# Supplementary material
Source: PubMed Central journal article supplement (PMC2640442)
Supplement: NIHMS88640-supplement-1_si_001.pdf [file NIHMS88640-supplement-1_si_001.pdf]

## Supporting Information

### Detailed Transition State Geometries from $^{13}\text{C}$ Isotope Effects. The Experimental Transition State and Mechanism of Epoxidation of Alkenes with Oxaziridines

Jennifer S. Hirschi,<sup>\*</sup> Tetsuya Takeya, Chao Hang, and Daniel A. Singleton<sup>\*</sup>

*Department of Chemistry, Texas A & M University*

College Station, Texas 77842

|                                                                    |    |
|--------------------------------------------------------------------|----|
| Figure of all B3LYP/6-31+G** Calculated Structures .....           | 6  |
| Technical Note on Frequency Calculations and KIE Predictions ..... | 9  |
| Calculational Results .....                                        | 10 |
| Sulfonyloxaziridine 1 (isomer-1) .....                             | 11 |
| B3LYP/6-31+G** .....                                               | 11 |
| B3LYP/6-31G* .....                                                 | 11 |
| MPW1K/6-31+G* .....                                                | 12 |
| B3LYP/6-31+G** (PCM).....                                          | 12 |
| MPW1K/6-31+G** (PCM).....                                          | 13 |
| B3PW91/6-31G* (gas phase).....                                     | 13 |
| BB1K/6-31G* (gas phase) .....                                      | 14 |
| BPW91/6-31G* (gas phase).....                                      | 14 |
| MPWLYP1M/6-31G* (gas phase) .....                                  | 15 |
| MPWB1K/6-31G* (gas phase).....                                     | 15 |
| MPW1B95/6-31G* (gas phase) .....                                   | 16 |
| MPWLYP1M/6-31G* (gas phase) .....                                  | 17 |
| PBELYP1W/6-31G* (gas phase) .....                                  | 18 |
| RHF/6-31G* (gas phase) .....                                       | 18 |
| TPSS1KCIS/6-31G* (gas phase).....                                  | 19 |
| TPSSLYP1W/6-31G* (gas phase) .....                                 | 19 |
| BP86/6-31G* (gas phase) .....                                      | 20 |
| Sulfonyloxaziridine 2 (isomer-2) .....                             | 21 |
| B3LYP/6-31+G** .....                                               | 21 |
| B3LYP/6-31G* .....                                                 | 21 |
| B3LYP/6-31+G** (PCM).....                                          | 22 |
| Sulfonyloxaziridine 3 (isomer-3) .....                             | 22 |
| B3LYP/6-31+G** .....                                               | 22 |
| B3LYP/6-31G* .....                                                 | 23 |
| B3LYP/6-31+G** (PCM).....                                          | 24 |
| trans-3-phenyl-2-methanesulfonyloxaziridine (isomer-1).....        | 24 |
| B3LYP/6-31+G** .....                                               | 24 |
| B3LYP/6-31G* .....                                                 | 25 |
| MPW1K/6-31+G* .....                                                | 26 |
| B3LYP/6-31+G** (PCM).....                                          | 27 |
| trans-3-phenyl-2-methanesulfonyloxaziridine (Isomer 2) .....       | 27 |
| B3LYP/6-31+G** .....                                               | 27 |
| B3LYP/6-31+G** (PCM).....                                          | 28 |
| trans-3-phenyl-2-methanesulfonyloxaziridine (Isomer 3) .....       | 29 |
| B3LYP/6-31+G** .....                                               | 29 |

|                                                             |    |
|-------------------------------------------------------------|----|
| B3LYP/6-31+G** (PCM).....                                   | 30 |
| cis-3-phenyl-2-methanesulfonyloxaziridine (Isomer 1) .....  | 31 |
| B3LYP/6-31+G** .....                                        | 31 |
| B3LYP/6-31G*.....                                           | 31 |
| B3LYP/6-31+G** (PCM).....                                   | 32 |
| cis-3-phenyl-2-methanesulfonyloxaziridine (Isomer 2) .....  | 33 |
| B3LYP/6-31+G** .....                                        | 33 |
| B3LYP/6-31+G** (PCM).....                                   | 34 |
| 2-methyl-2-butene .....                                     | 34 |
| B3LYP/6-31+G** .....                                        | 34 |
| mPW1K/6-31+G** .....                                        | 35 |
| B3LYP/6-31G*.....                                           | 35 |
| MPW1K/6-31+G* .....                                         | 36 |
| MP2/6-31G*.....                                             | 37 |
| HF/6-31G* .....                                             | 37 |
| BP86/6-31G*.....                                            | 38 |
| B3LYP/6-311+G** .....                                       | 38 |
| B3LYP/6-31+G** (PCM).....                                   | 39 |
| mPW1k/6-31+G** (PCM).....                                   | 40 |
| B3LYP/6-31+G** (onsager).....                               | 40 |
| mPW1k/6-31+G** (onsager).....                               | 41 |
| B3LYP/6-311+G** (PCM).....                                  | 41 |
| B3PW91/6-31G* (gas phase).....                              | 42 |
| BB1K/6-31G* (gas phase).....                                | 42 |
| BPW91/6-31G* (gas phase).....                               | 43 |
| MPW3LYP/6-31G* (gas phase).....                             | 43 |
| MPWB195/6-31G* (gas phase) .....                            | 44 |
| MPWLYP1M/6-31G* (gas phase).....                            | 45 |
| PBE1KCIS/6-31G* (gas phase) .....                           | 46 |
| PBELYP1W/6-31G* (gas phase).....                            | 47 |
| RHF/6-31G* (gas phase) .....                                | 47 |
| TPSSKCIS/6-31G* (gas phase) .....                           | 48 |
| TPSSLYP1W/6-31G* (gas phase) .....                          | 48 |
| TS for Oxaziridine Inversion B3LYP/6-31G*.....              | 49 |
| TS for 3-phenyl-2-methanesulfonyloxaziridine Inversion..... | 51 |
| B3LYP/6-31+G** (PCM).....                                   | 52 |
| Epoxidation TS Isomer 1 .....                               | 52 |
| B3LYP/6-31G*.....                                           | 52 |
| B3LYP/6-31G* (Onsager) .....                                | 54 |
| Epoxidation TS Isomer 2 .....                               | 55 |
| B3LYP/6-31+G** (PCM).....                                   | 55 |
| B3LYP/6-31+G** (gas phase).....                             | 56 |
| B3LYP/6-31+G** (onsager).....                               | 56 |
| B3LYP/6-31G* (gas phase).....                               | 57 |
| mPW1K/6-31+G** (PCM).....                                   | 58 |
| mPW1K/6-31+G** (gas phase) .....                            | 59 |
| mPW1K/6-31+G** (onsager).....                               | 59 |
| Epoxidation TS Isomer 3 .....                               | 60 |
| B3LYP/6-31+G** (PCM).....                                   | 60 |
| B3LYP/6-31+G** (gas phase).....                             | 61 |
| B3LYP/6-31+G** (onsager).....                               | 62 |
| mPW1K/6-31+G** (PCM).....                                   | 63 |

|                                   |     |
|-----------------------------------|-----|
| mPW1K/6-31+G** (gas phase) .....  | 64  |
| mPW1K/6-31+G** (onsager) .....    | 64  |
| B3LYP/6-31G* (gas phase) .....    | 65  |
| MPW1K/6-31+G* (gas phase) .....   | 66  |
| MPW1K/6-31+G* (Onsager) .....     | 67  |
| Epoxidation TS Isomer 4 .....     | 67  |
| B3LYP/6-31+G** (PCM) .....        | 67  |
| B3LYP/6-31+G** (gas phase) .....  | 69  |
| B3LYP/6-31+G** (onsager) .....    | 69  |
| mPW1K/6-31+G** (PCM) .....        | 70  |
| mPW1K/6-31+G** (gas phase) .....  | 71  |
| mPW1K/6-31+G** (onsager) .....    | 72  |
| B3LYP/6-31G* (gas phase) .....    | 72  |
| mPW1K/6-31+G** (gas phase) .....  | 73  |
| mPW1K/6-31+G** (onsager) .....    | 74  |
| Epoxidation TS Isomer 5 .....     | 75  |
| B3LYP/6-31+G** (PCM) .....        | 75  |
| B3LYP/6-31+G** (gas phase) .....  | 76  |
| B3LYP/6-31+G** (onsager) .....    | 76  |
| mPW1K/6-31+G** (PCM) .....        | 77  |
| mPW1K/6-31+G** (gas phase) .....  | 78  |
| mPW1K/6-31+G** (onsager) .....    | 79  |
| B3LYP/6-31G* (gas phase) .....    | 79  |
| B3LYP/6-31G* (Onsager) .....      | 80  |
| HF/6-31G* (gas phase) .....       | 81  |
| BP86/6-31G* (gas phase) .....     | 82  |
| MPW1K/6-31+G* (gas phase) .....   | 83  |
| MPW1K/6-31+G* (Onsager) .....     | 83  |
| Epoxidation TS Isomer 6 .....     | 84  |
| B3LYP/6-31+G** (PCM) .....        | 84  |
| B3LYP/6-31+G** (gas phase) .....  | 85  |
| B3LYP/6-31+G** (Onsager) .....    | 86  |
| mPW1K/6-31+G** (PCM) .....        | 87  |
| mPW1K/6-31+G** (gas phase) .....  | 87  |
| mPW1K/6-31+G** (onsager) .....    | 88  |
| B3LYP/6-31G* (gas phase) .....    | 89  |
| MPW1K/6-31+G* (gas phase) .....   | 90  |
| MPW1K/6-31+G* (gas phase) .....   | 90  |
| Epoxidation TS Isomer 7 .....     | 91  |
| B3LYP/6-31+G** (PCM) .....        | 91  |
| B3LYPL/6-31+G** (gas phase) ..... | 92  |
| B3LYP/6-31+G** (Onsager) .....    | 93  |
| mPW1K/6-31+G** (PCM) .....        | 94  |
| mPW1K/6-31+G** (gas phase) .....  | 94  |
| mPW1K/6-31+G** (Onsager) .....    | 95  |
| B3LYP/6-31G* (gas phase) .....    | 96  |
| B3LYLP/6-31G* (Onsager) .....     | 97  |
| BP86 (gas phase) .....            | 98  |
| MPW1K/6-31+G* (gas phase) .....   | 98  |
| MPW1K/6-31+G* (Onsager) .....     | 99  |
| Epoxidation TS Isomer 8 .....     | 100 |
| B3LYP/6-31+G** .....              | 100 |

|                                              |     |
|----------------------------------------------|-----|
| B3LYP/6-31+G** (gas phase) .....             | 101 |
| B3LYP/6-31+G** (Onsager) .....               | 102 |
| mPW1K/6-31+G** (PCM) .....                   | 102 |
| mPW1K/6-31+G** (gas phase) .....             | 103 |
| mPW1K/6-31+G** (Onsager) .....               | 104 |
| B3LYP/6-31G* (gas phase) .....               | 105 |
| B3LYP/6-31G* (Onsager) .....                 | 105 |
| B3LYP/6-311+G** (gas phase) .....            | 106 |
| BP86/6-31G* (gas phase) .....                | 107 |
| MPW1K/6-31+G* (gas phase) .....              | 108 |
| MPW1K/6-31+G* (Onsager) .....                | 109 |
| B3PW91/6-31G* (gas phase) .....              | 109 |
| BB1K/6-31G* (gas phase) .....                | 110 |
| BPW91/6-31G* (gas phase) .....               | 111 |
| MPW3LYP/6-31G* (gas phase) .....             | 111 |
| MPWB1K/6-31G* (gas phase) .....              | 112 |
| MPW1B95/6-31G* (gas phase) .....             | 113 |
| MPWLYP1M/6-31G* (gas phase) .....            | 114 |
| PBE1KCIS/6-31G* (gas phase) .....            | 114 |
| PBE1W/6-31G* (gas phase) .....               | 115 |
| PBELYP1W/6-31G* (gas phase) .....            | 116 |
| RHF/6-31G* (gas phase) .....                 | 117 |
| TPSS1KCIS/6-31G* (gas phase) .....           | 117 |
| TPSSLYP1W/6-31G* (gas phase) .....           | 118 |
| Epoxidation TS Isomer 9 .....                | 119 |
| B3LYP/6-31+G** (PCM) .....                   | 119 |
| B3LYP/6-31+G** (gas phase) .....             | 120 |
| B3LYP/6-31+G** (Onsager) .....               | 121 |
| MPW1K/6-31+G** (PCM) .....                   | 121 |
| MPW1K/6-31+G** (Onsager) .....               | 123 |
| B3LYP/6-31G* (gas phase) .....               | 123 |
| B3LYP/6-31G* (Onsager) .....                 | 124 |
| BP86/6-31* (gas phase) .....                 | 125 |
| MPW1K/6-31+G* (gas phase) .....              | 126 |
| MPW1K/6-31+G* (Onsager) .....                | 127 |
| Epoxidation TS Isomer 3 + trans-Phenyl ..... | 127 |
| B3LYP/6-31+G** (PCM) .....                   | 127 |
| B3LYP/6-31+G** (gas phase) .....             | 129 |
| Epoxidation TS Isomer 5 + trans-Phenyl ..... | 130 |
| B3LYP/6-31+G** (PCM) .....                   | 130 |
| B3LYP/6-31+G** (gas phase) .....             | 131 |
| B3LYP/6-31+G** (gas phase) .....             | 132 |
| B3LYP/6-31G* (Onsager) .....                 | 133 |
| Epoxidation TS Isomer 7 + trans-Phenyl ..... | 134 |
| B3LYP/6-31+G** (PCM) .....                   | 134 |
| B3LYP/6-31+G** (gas phase) .....             | 135 |
| Epoxidation TS Isomer 8 + trans-Phenyl ..... | 136 |
| B3LYP/6-31+G** (PCM) .....                   | 136 |
| B3LYP/6-31+G** (gas phase) .....             | 137 |
| B3LYP/6-311+G** (PCM) .....                  | 138 |
| B3LYP/6-31G* (gas phase) .....               | 139 |
| B3LYP/6-31G* (Onsager) .....                 | 140 |



|                                                                    |     |
|--------------------------------------------------------------------|-----|
| Epoxidation TS Isomer 9 + trans-Phenyl.....                        | 141 |
| B3LYP/6-31+G** (PCM).....                                          | 141 |
| B3LYP/6-31+G** (gas phase).....                                    | 142 |
| B3LYP/6-31G* (gas phase).....                                      | 143 |
| B3LYP/6-31G* (Onsager).....                                        | 144 |
| Epoxidation TS Isomer 3 + cis-Phenyl.....                          | 145 |
| B3LYP/6-31+G** (PCM).....                                          | 145 |
| B3LYP/6-31+G** (gas phase).....                                    | 146 |
| Epoxidation TS Isomer 5 + cis-Phenyl.....                          | 147 |
| B3LYP/6-31+G** (PCM).....                                          | 147 |
| B3LYP/6-31+G** (gas phase).....                                    | 148 |
| B3LYP/6-31G* (gas phase).....                                      | 149 |
| Epoxidation TS Isomer 7 + cis-Phenyl.....                          | 150 |
| B3LYP/6-31+G** (PCM).....                                          | 150 |
| B3LYP/6-31+G** (gas phase).....                                    | 151 |
| Epoxidation TS Isomer 8 + cis-Phenyl.....                          | 152 |
| B3LYP/6-31+G** (PCM).....                                          | 152 |
| B3LYP/6-31+G** (gas phase).....                                    | 153 |
| B3LYP/6-31G* (gas phase).....                                      | 154 |
| Epoxidation TS Isomer 9 + cis-Phenyl.....                          | 155 |
| B3LYP/6-31+G** (PCM).....                                          | 155 |
| B3LYP/6-31+G** (gas phase).....                                    | 156 |
| CCSDT Parent.....                                                  | 157 |
| B3LYP Parent.....                                                  | 158 |
| mPW1K Parent.....                                                  | 158 |
| Table of B3LYP/6-31+G** Energies.....                              | 159 |
| Table of Free Energy Barriers.....                                 | 160 |
| Table of KIEs and C-O Bond Distances.....                          | 160 |
| Plot of C-O Bond Distance versus KIEs for the Shi Epoxidation..... | 168 |
| Table of KIEs and C-O Bond Distances for the Shi Epoxidation.....  | 168 |
| Energies and Geometries of Non-Stationary Point Structures.....    | 169 |
| Grid Structure C3 fixed at 1.9 / C2 fixed at 1.9.....              | 169 |
| Grid Structure C3 fixed at 1.9 / C2 fixed at 2.0.....              | 170 |
| Grid Structure C3 fixed at 1.9 / C2 fixed at 2.1.....              | 171 |
| Grid Structure C3 fixed at 1.9 / C2 fixed at 2.2.....              | 171 |
| Grid Structure C3 fixed at 1.9 / C2 fixed at 2.3.....              | 172 |
| Grid Structure C3 fixed at 2.0 / C2 fixed at 1.9.....              | 173 |
| Grid Structure C3 fixed at 2.0 / C2 fixed at 2.0.....              | 173 |
| Grid Structure C3 fixed at 2.0 / C2 fixed at 2.1.....              | 174 |
| Grid Structure C3 fixed at 2.0 / C2 fixed at 2.2.....              | 175 |
| Grid Structure C3 fixed at 2.0 / C2 fixed at 2.3.....              | 176 |
| Grid Structure C3 fixed at 2.0 / C2 fixed at 2.4.....              | 176 |
| Grid Structure C3 fixed at 2.0 / C2 fixed at 2.5.....              | 177 |
| Grid Structure C3 fixed at 2.1 / C2 fixed at 1.9.....              | 178 |
| Grid Structure C3 fixed at 2.1 / C2 fixed at 2.0.....              | 178 |
| Grid Structure C3 fixed at 2.1 / C2 fixed at 2.1.....              | 179 |
| Grid Structure C3 fixed at 2.1 / C2 fixed at 2.2.....              | 180 |
| Grid Structure C3 fixed at 2.1 / C2 fixed at 2.3.....              | 181 |
| Grid Structure C3 fixed at 2.1 / C2 fixed at 2.4.....              | 181 |
| Grid Structure C3 fixed at 2.1 / C2 fixed at 2.5.....              | 182 |
| Grid Structure C3 fixed at 2.2 / C2 fixed at 1.9.....              | 183 |
| Grid Structure C3 fixed at 2.2 / C2 fixed at 2.0.....              | 183 |

|                                                            |     |
|------------------------------------------------------------|-----|
| Grid Structure C3 fixed at 2.2 / C2 fixed at 2.1 .....     | 184 |
| Grid Structure C3 fixed at 2.2 / C2 fixed at 2.2 .....     | 185 |
| Grid Structure C3 fixed at 2.2 / C2 fixed at 2.3 .....     | 186 |
| Grid Structure C3 fixed at 2.2 / C2 fixed at 2.4 .....     | 186 |
| Grid Structure C3 fixed at 2.2 / C2 fixed at 2.5 .....     | 187 |
| Grid Structure C3 fixed at 2.3 / C2 fixed at 1.9 .....     | 188 |
| Grid Structure C3 fixed at 2.3 / C2 fixed at 2.0 .....     | 188 |
| Grid Structure C3 fixed at 2.3 / C2 fixed at 2.1 .....     | 189 |
| Grid Structure C3 fixed at 2.3 / C2 fixed at 2.2 .....     | 190 |
| Grid Structure C3 fixed at 2.3 / C2 fixed at 2.3 .....     | 190 |
| Grid Structure C3 fixed at 2.3 / C2 fixed at 2.4 .....     | 191 |
| Grid Structure C3 fixed at 2.3 / C2 fixed at 2.5 .....     | 192 |
| Grid Structure C3 fixed at 2.4 / C2 fixed at 2.0 .....     | 193 |
| Grid Structure C3 fixed at 2.4 / C2 fixed at 2.1 .....     | 193 |
| Grid Structure C3 fixed at 2.4 / C2 fixed at 2.2 .....     | 194 |
| Grid Structure C3 fixed at 2.4 / C2 fixed at 2.3 .....     | 195 |
| Grid Structure C3 fixed at 2.4 / C2 fixed at 2.4 .....     | 195 |
| Interpolated Grid of Non-Stationary Point Structures ..... | 196 |
| Predicted KIE at C3 .....                                  | 196 |
| Predicted KIE at C2 .....                                  | 202 |
| Geometry Predictions from Non-Stationary Point Grid .....  | 208 |
| Experimental NMR Results .....                             | 209 |

## Figure of all B3LYP/6-31+G\*\* Calculated Structures

Transition structures for the epoxidation of 2-methyl-2-butene with 2-(methylsulfonyl)oxaziridine using B3LYP/6-31+G\*\*. Bond distances in angstroms from gas-phase calculations are shown in parentheses, from calculations using a PCM solvent model are shown without parentheses, and from calculations using an Onsager solvent model are shown in brackets.

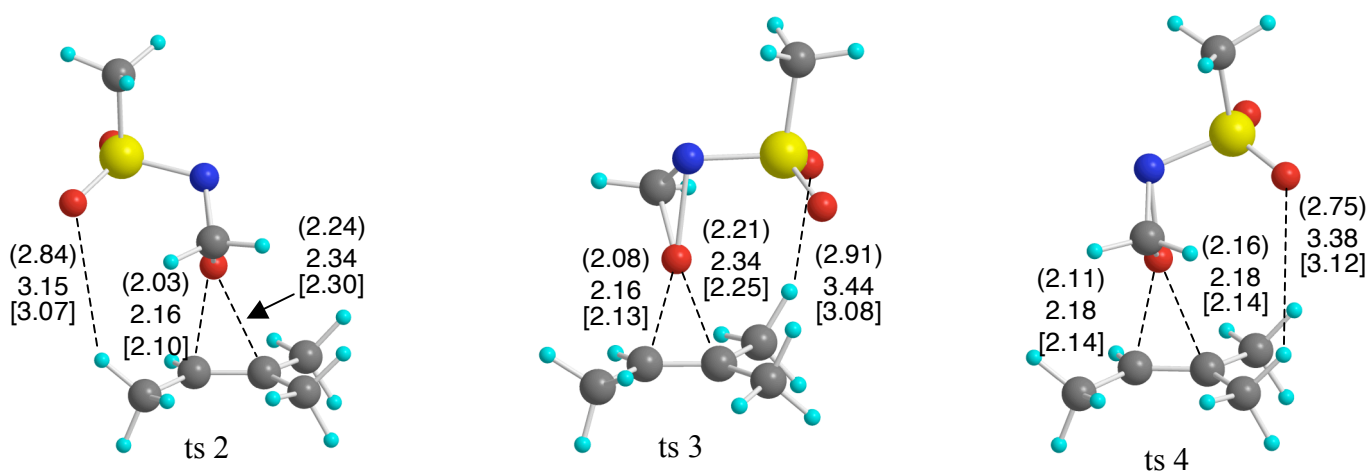

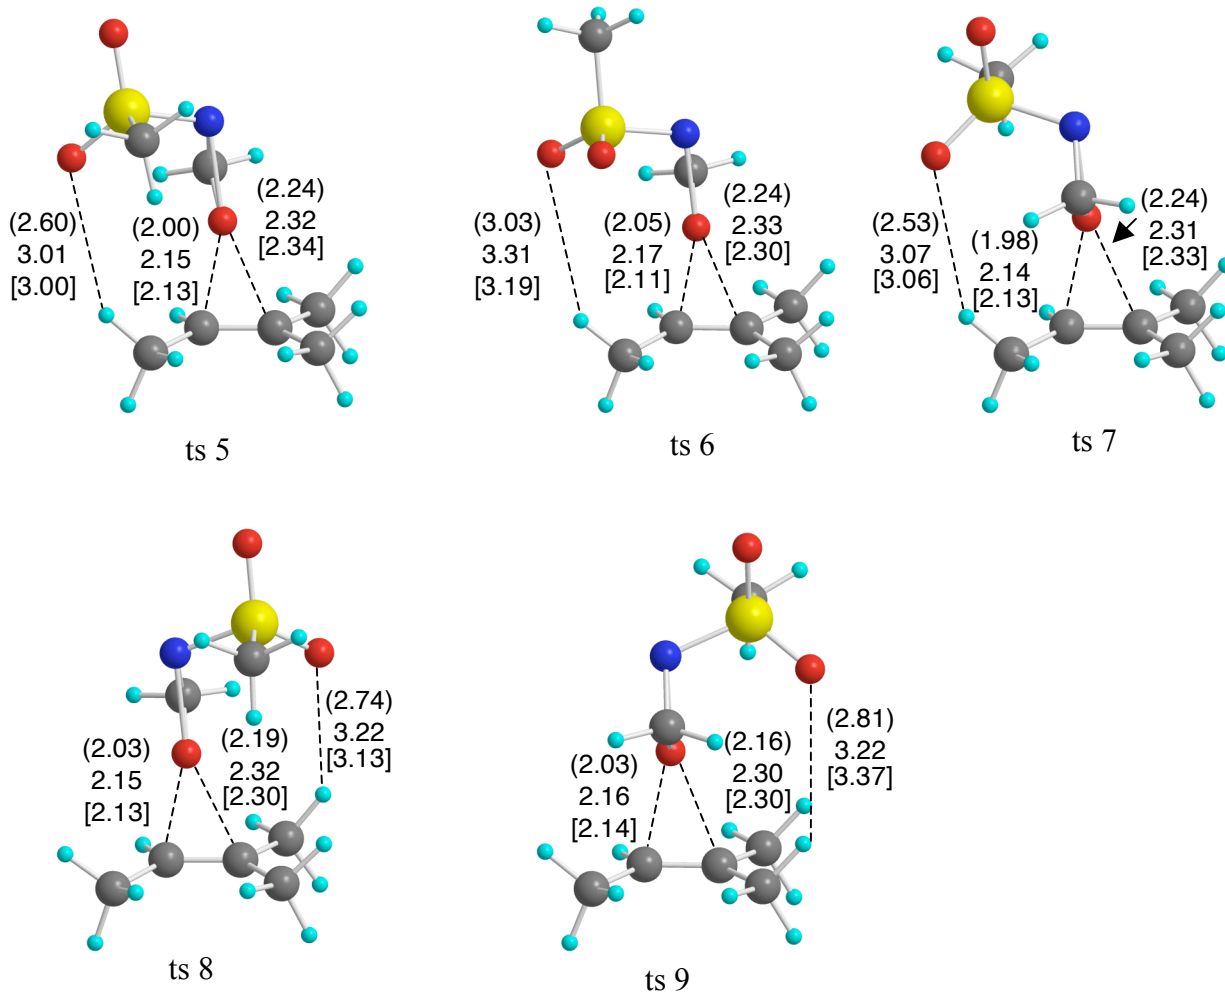

Transition structures for the epoxidation of 2-methyl-2-butene with *trans*- and *cis*-3-phenyl-2-methanesulfonyloxaziridine using B3LYP/6-31+G\*\*. Bond distances in angstroms from gas-phase calculations are shown in parentheses, and distances from calculations using a PCM solvent model are shown without parentheses.

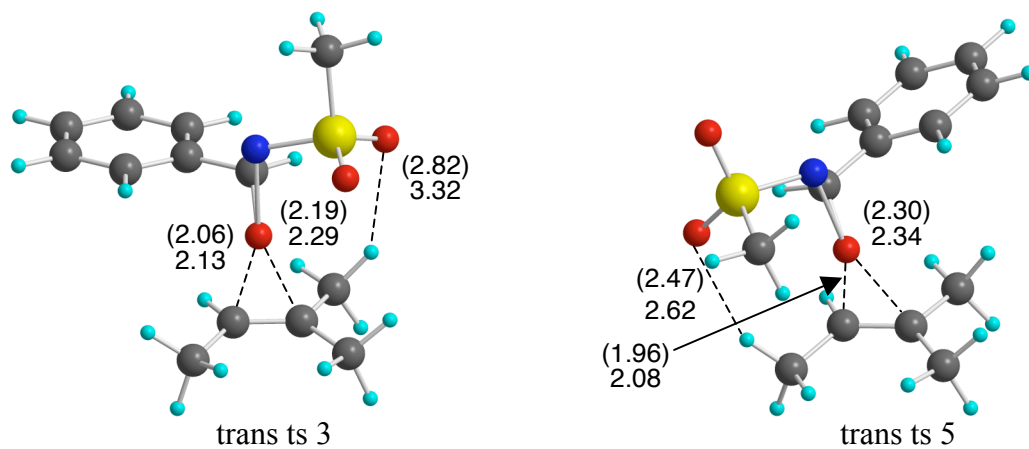

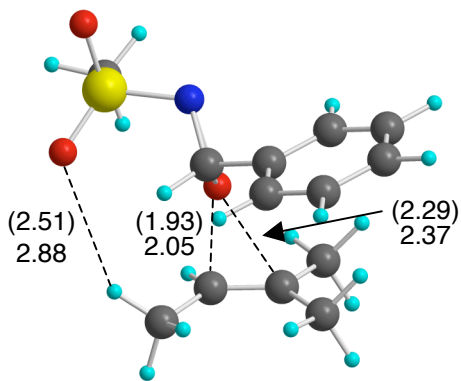

trans ts 7

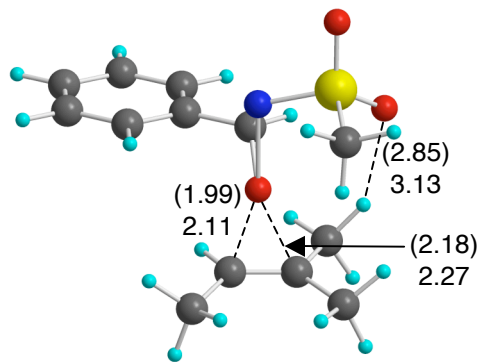

trans ts 8

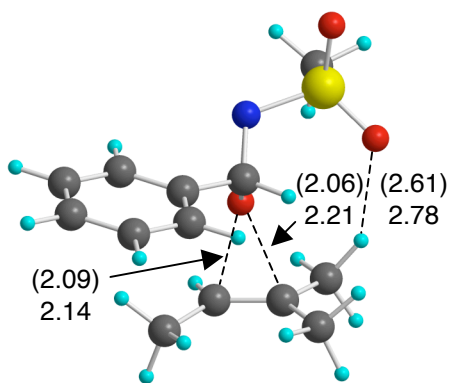

trans ts 9

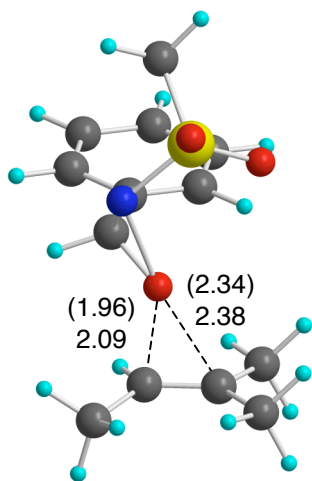

cis ts 3

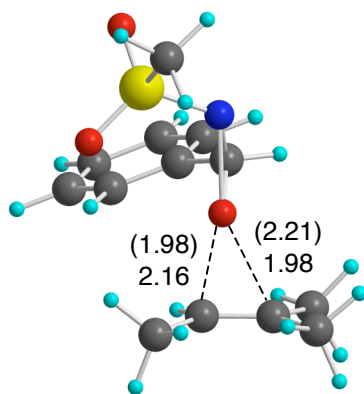

cis ts 5

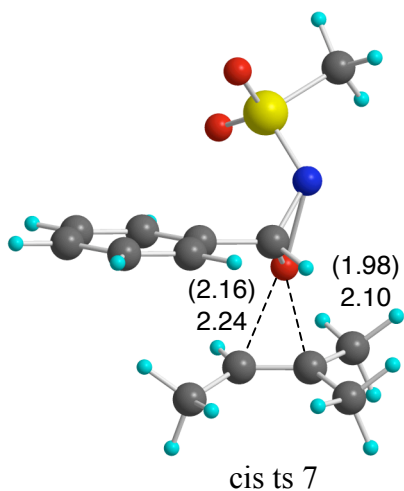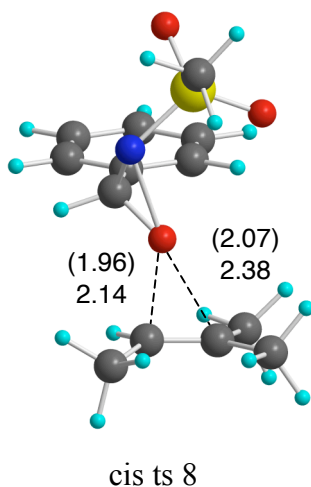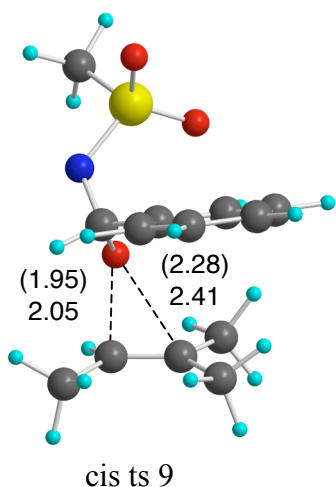

## Technical Note on Frequency Calculations and KIE Predictions

As described in the main text, the program QUIVER (reference 27) was employed here to calculate the isotope effects. QUIVER works by calculating the vibrational frequencies for isotopologues then using these frequencies in the Bigeleisen equation (reference 26). QUIVER calculates frequencies by diagonalizing the full mass-weighted Cartesian Hessian, and this process is subject to error because it does not first project out the rotational and translation degrees of freedom. The program ISOEFF98 used in the Schramm process (reference 11a) employs the same process. In contrast, programs such as Gaussian03 (reference 24a) employ a more accurate process of projecting out the rotational and translational modes. The difference between the processes usually makes no significant difference in the calculated high-energy modes, but the lowest-energy vibrational modes can be contaminated by rotational and translational modes if they are not first projected out.

At stationary points, the difference between frequencies calculated with versus without projecting out the rotational and translational modes is small. For a set of 29 of the transition structures here, the average absolute error in the lowest-two real frequencies was  $0.24 \text{ cm}^{-1}$ . At non-stationary points, the error is greater. For the 38 non-stationary points associated with the grid discussed in the main text, the average absolute error was  $3.4 \text{ cm}^{-1}$ . It should be noted that the frequency predictions at non-stationary points do not project out the gradients at these points.

We next examine how this issue and related problems with low-energy modes impact kinetic isotope effect predictions. This was done by comparing kinetic isotope effects predicted in three ways: Method A – based on QUIVER, using the frequencies obtained without projecting out the rotational and translation modes in the Bigeleisen equation; Method B – using frequencies obtained with projecting out the rotational and translational modes in the Bigeleisen equation; and Method C – based on free-energies of activation, using the harmonic free energy estimates from Gaussian03. (It

should be noted that Method C is subject to a significant round-off error when using the default digits from Gaussian03.)

In a comparison of the three methods for 14 stationary point transition structures (gas phase structures ts 2 through ts 9 and PCM structures ts 4 through ts 9 from the previous section), the predicted KIEs from the three methods are identical within the round-off error of Method C. The average absolute difference between predictions of carbon KIEs by Method A versus Method B at these stationary points was only 0.000018, essentially negligible. The agreement of Method A and Method B at stationary points is unsurprising, as it has long been known that the incorporation of the Redlich-Teller product rule into the Bigeleisen equation minimizes the importance of the low frequencies (and errors therein, see reference 31). The agreement of Methods A and B with Method C is unsurprising as this is essentially based on the Redlich-Teller product rule.

The situation is more complicated at non-stationary points. Out of 76 KIEs based on the 38 non-stationary points associated with the grid discussed in the main text, a difference of  $> 0.001$  between Method A and Method B is seen in 12 cases. The source of the discrepancy when it arises is a difference in the imaginary frequencies factored into the KIE prediction. In each of the 76 cases, there is a negligible difference between the reduced isotopic partition functions (as derived from the real frequencies and the Bigeleisen equation). However, the difference in the portion of the KIEs derived from the imaginary frequencies ranges up to 0.017 in the 12 bad cases. These bad cases have a common feature – the imaginary frequencies are all small, between  $-20$  and  $-50$   $\text{cm}^{-1}$ , and there is significant rotational contamination of these modes. For the 64 KIEs derived from structures with imaginary frequencies ranging from  $-50$  to  $-475$   $\text{cm}^{-1}$ , little rotational contamination of the imaginary frequency was apparent and Method A and Method B agreed within 0.0002 in all cases.

For the KIEs calculated at non-stationary points, Method C agreed (within round-off error) with Methods A and B in only 32 cases. The comparison failed uniformly when the structures exhibited two imaginary frequencies, and likewise failed when the lowest real frequency was below  $25^{-1}$ . The predictions of KIEs based on free energies are subject to particularly large errors – in one case a carbon KIE of 7% was predicted.

The problems with KIE predictions at non-stationary points are not surprising and the general lesson is that care should be taken in applying the Schramm process, particularly when the constrained structures involve very small frequencies. Nonetheless, as described in main text, the inaccuracies in the derived geometries in our test cases appear to be small.

## Calculational Results

Unless otherwise stated, structures were fully optimized in B3LYP calculations with a 6-31+G\*\* basis set. All structures and energies were obtained using standard procedures in Gaussian03<sup>1</sup>. Vibrational frequency analyses were carried out on all stationary points.

1. (this is the complete reference for 24a in the paper) Gaussian 03, Revision C.02, Frisch, M. J.; Trucks, G. W.; Schlegel, H. B.; Scuseria, G. E.; Robb, M. A.; Cheeseman, J. R.; Montgomery, Jr., J. A.; Vreven, T.; Kudin, K. N.; Burant, J. C.; Millam, J. M.; Iyengar, S. S.; Tomasi, J.; Barone, V.; Mennucci, B.; Cossi, M.; Scalmani, G.; Rega, N.; Petersson, G. A.; Nakatsuji, H.; Hada, M.; Ehara, M.; Toyota, K.; Fukuda, R.; Hasegawa, J.; Ishida, M.; Nakajima, T.; Honda, Y.; Kitao, O.; Nakai, H.; Klene, M.; Li, X.; Knox, J. E.; Hratchian, H. P.; Cross, J. B.; Bakken, V.; Adamo, C.; Jaramillo, J.; Gomperts, R.; Stratmann, R. E.; Yazyev, O.; Austin, A. J.; Cammi, R.; Pomelli, C.; Ochterski, J. W.; Ayala, P. Y.; Morokuma, K.; Voth, G. A.; Salvador, P.; Dannenberg, J. J.; Zakrzewski, V. G.; Dapprich, S.; Daniels, A. D.; Strain, M. C.; Farkas, O.; Malick, D. K.; Rabuck, A. D.; Raghavachari, K.; Foresman, J. B.; Ortiz, J. V.; Cui, Q.; Baboul, A. G.; Clifford, S.; Cioslowski, J.; Stefanov, B. B.; Liu, G.; Liashenko, A.; Piskorz, P.; Komaromi, I.; Martin, R. L.; Fox, D. J.; Keith, T.; Al-Laham, M. A.; Peng, C. Y.; Nanayakkara, A.; Challacombe, M.; Gill, P. M. W.; Johnson, B.; Chen, W.; Wong, M. W.; Gonzalez, C.; and Pople, J. A.; Gaussian, Inc., Wallingford CT, 2004.

# Sulfonyloxaziridine 1 (isomer-1)

B3LYP/6-31+G\*\*

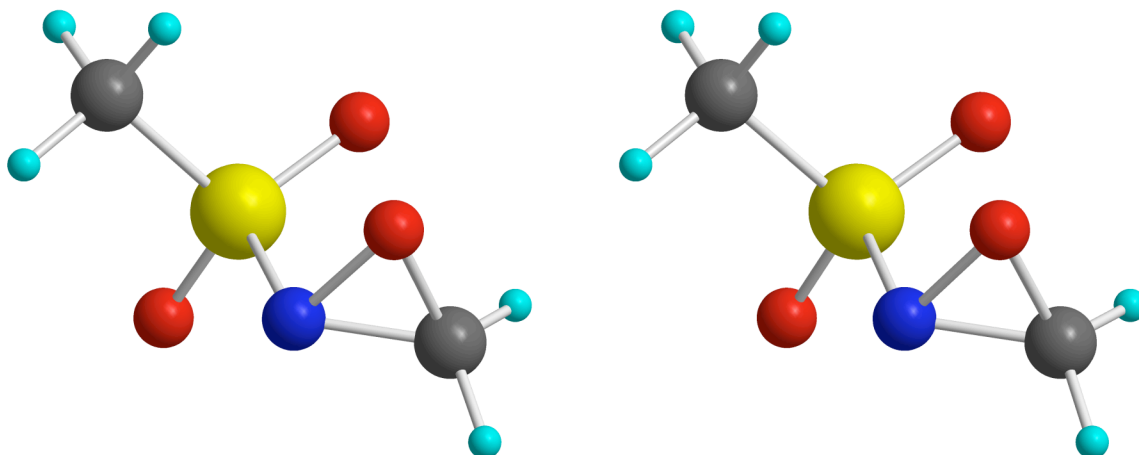

filename: oxazsm

E(RB+HF-LYP) = -757.691699168

|                                              |                             |
|----------------------------------------------|-----------------------------|
| Zero-point correction=                       | 0.082933 (Hartree/Particle) |
| Thermal correction to Energy=                | 0.090437                    |
| Thermal correction to Enthalpy=              | 0.091381                    |
| Thermal correction to Gibbs Free Energy=     | 0.050972                    |
| Sum of electronic and zero-point Energies=   | -757.608766                 |
| Sum of electronic and thermal Energies=      | -757.601262                 |
| Sum of electronic and thermal Enthalpies=    | -757.600318                 |
| Sum of electronic and thermal Free Energies= | -757.640727                 |

|       | E (Thermal) | CV             | S              |
|-------|-------------|----------------|----------------|
|       | KCal/Mol    | Cal/Mol-Kelvin | Cal/Mol-Kelvin |
| Total | 56.750      | 26.234         | 85.048         |

O,0,0.0510295943,-0.0631016628,0.551056526  
C,0,1.0659746458,0.1652402616,1.5026383323  
N,0,0.2048728469,1.2742926093,1.16762624  
S,0,-1.094790091,1.5032099844,2.386676419  
C,0,-2.4621150901,1.8385486661,1.2697825365  
O,0,-0.6967249473,2.7272990609,3.0853317425  
O,0,-1.3603136555,0.2614766713,3.1230503371  
H,0,2.0803873729,0.2445758007,1.1165486816  
H,0,0.9267347058,-0.3390582996,2.4580279768  
H,0,-3.327278103,2.0532692747,1.8998436992  
H,0,-2.6336452451,0.9493418598,0.6624631688  
H,0,-2.1988400338,2.7023867735,0.6591793405

B3LYP/6-31G\*

E(RB+HF-LYP) = -757.667456767

E (Cosmo, CHCl<sub>3</sub>) E(RB+HF-LYP) = -757.667550533

|                                            |                             |
|--------------------------------------------|-----------------------------|
| Zero-point correction=                     | 0.083602 (Hartree/Particle) |
| Thermal correction to Energy=              | 0.091041                    |
| Thermal correction to Enthalpy=            | 0.091985                    |
| Thermal correction to Gibbs Free Energy=   | 0.051732                    |
| Sum of electronic and zero-point Energies= | -757.583855                 |
| Sum of electronic and thermal Energies=    | -757.576416                 |
| Sum of electronic and thermal Enthalpies=  | -757.575471                 |

Sum of electronic and thermal Free Energies= -757.615724

|       | E (Thermal)<br>KCAL/MOL | CV<br>CAL/MOL-KELVIN | S<br>CAL/MOL-KELVIN |
|-------|-------------------------|----------------------|---------------------|
| TOTAL | 57.129                  | 26.017               | 84.719              |

Standard orientation:

| Center<br>Number | Atomic<br>Number | Atomic<br>Type |   | Coordinates (Angstroms) |           |           |
|------------------|------------------|----------------|---|-------------------------|-----------|-----------|
|                  |                  |                |   | X                       | Y         | Z         |
| 1                | 6                | 0              | C | 2.013609                | -0.501011 | -0.069320 |
| 2                | 8                | 0              | O | 1.781746                | 0.873103  | 0.116506  |
| 3                | 7                | 0              | N | 0.906620                | 0.085603  | -0.785959 |
| 4                | 16               | 0              | S | -0.649755               | -0.206362 | 0.053851  |
| 5                | 8                | 0              | O | -0.441562               | -0.476347 | 1.479520  |
| 6                | 8                | 0              | O | -1.335497               | -1.167760 | -0.809231 |
| 7                | 6                | 0              | C | -1.368658               | 1.430368  | -0.138918 |
| 8                | 1                | 0              | H | 1.808859                | -1.130883 | 0.795470  |
| 9                | 1                | 0              | H | 2.865690                | -0.770158 | -0.691766 |
| 10               | 1                | 0              | H | -1.419763               | 1.662899  | -1.203434 |
| 11               | 1                | 0              | H | -0.743418               | 2.145934  | 0.397069  |
| 12               | 1                | 0              | H | -2.368824               | 1.386665  | 0.297819  |

## MPW1K/6-31+G\*

E(RmPW+HF-PW91) = -757.552901408

|                                              |                             |
|----------------------------------------------|-----------------------------|
| Zero-point correction=                       | 0.087141 (Hartree/Particle) |
| Thermal correction to Energy=                | 0.094225                    |
| Thermal correction to Enthalpy=              | 0.095169                    |
| Thermal correction to Gibbs Free Energy=     | 0.055665                    |
| Sum of electronic and zero-point Energies=   | -757.465760                 |
| Sum of electronic and thermal Energies=      | -757.458677                 |
| Sum of electronic and thermal Enthalpies=    | -757.457732                 |
| Sum of electronic and thermal Free Energies= | -757.497236                 |

|       | E (Thermal)<br>KCAL/MOL | CV<br>CAL/MOL-KELVIN | S<br>CAL/MOL-KELVIN |
|-------|-------------------------|----------------------|---------------------|
| TOTAL | 59.127                  | 24.772               | 83.143              |

C,0,1.9781565355,-0.5068712977,-0.0718440475  
O,0,1.7384140003,0.8452185559,0.1232013037  
N,0,0.8802993346,0.08854669,-0.7522985666  
S,0,-0.6322404206,-0.193776241,0.0480146317  
O,0,-0.4277587449,-0.4614706488,1.4524787186  
O,0,-1.3015900402,-1.1496393682,-0.7974375596  
C,0,-1.3498695248,1.4046535387,-0.1432322189  
H,0,1.7822753933,-1.1364725363,0.78638809  
H,0,2.8187365646,-0.7580354094,-0.7032966835  
H,0,-1.4071929101,1.6345653233,-1.201667302  
H,0,-0.7382242896,2.1257018989,0.3889840204  
H,0,-2.3440871571,1.3552719919,0.2919656313

## B3LYP/6-31+G\*\* (PCM)

Filename: oxazsmaPCM

E(RB+HF-LYP) = -757.701663066



Zero-point correction= 0.082586 (Hartree/Particle)  
 Thermal correction to Energy= 0.090106  
 Thermal correction to Enthalpy= 0.091050  
 Thermal correction to Gibbs Free Energy= 0.050608  
 Sum of electronic and zero-point Energies= -757.619077  
 Sum of electronic and thermal Energies= -757.611557  
 Sum of electronic and thermal Enthalpies= -757.610613  
 Sum of electronic and thermal Free Energies= -757.651055

|       | E (Thermal)<br>KCal/Mol | CV<br>Cal/Mol-Kelvin | S<br>Cal/Mol-Kelvin |
|-------|-------------------------|----------------------|---------------------|
| Total | 56.542                  | 26.319               | 85.117              |

O,0,-1.8062755333,0.8616262667,0.1496599331  
 C,0,-2.0277700743,-0.5158308305,-0.0784592386  
 N,0,-0.9164856919,0.1090517677,-0.7592679321  
 S,0,0.6460137463,-0.1837411535,0.0634270608  
 C,0,1.3966937924,1.4302350065,-0.1509899463  
 O,0,1.3013100682,-1.1755925821,-0.8002232666  
 O,0,0.4608128646,-0.4599871182,1.4959230036  
 H,0,-2.8694393858,-0.7689022736,-0.7212637174  
 H,0,-1.829310362,-1.1652776526,0.7738164406  
 H,0,2.4030395811,1.3590608539,0.2684784827  
 H,0,0.7982729484,2.1614623144,0.3948618055  
 H,0,1.4311740463,1.6498754014,-1.2189996253

### MPW1K/6-31+G\*\* (PCM)

Filename: mpBBoxazsmPCM

E(RmPW-PW91) = -757.683169025

Zero-point correction= 0.082004 (Hartree/Particle)  
 Thermal correction to Energy= 0.088474  
 Thermal correction to Enthalpy= 0.089419  
 Thermal correction to Gibbs Free Energy= 0.051117  
 Sum of electronic and zero-point Energies= -757.601165  
 Sum of electronic and thermal Energies= -757.594695  
 Sum of electronic and thermal Enthalpies= -757.593750  
 Sum of electronic and thermal Free Energies= -757.632052

|       | E (Thermal)<br>KCal/Mol | CV<br>Cal/Mol-Kelvin | S<br>Cal/Mol-Kelvin |
|-------|-------------------------|----------------------|---------------------|
| Total | 55.519                  | 22.767               | 80.612              |

O,0,-1.7468448939,0.8483593551,0.1461559456  
 C,0,-1.990533982,-0.5037152042,-0.0727040867  
 N,0,-0.8876059875,0.1070309983,-0.7365710847  
 S,0,0.6252094929,-0.1743329415,0.0507666544  
 C,0,1.3642142541,1.4074775652,-0.1507659542  
 O,0,1.2751075884,-1.1531246958,-0.792183783  
 O,0,0.434901224,-0.4493337624,1.4589692947  
 H,0,-2.8281254773,-0.7425693622,-0.7140490802  
 H,0,-1.8001404177,-1.1490810646,0.7759787475  
 H,0,2.3608701579,1.3418313936,0.2770497884  
 H,0,0.7669073004,2.1379243509,0.3853174892  
 H,0,1.4140777405,1.6315123677,-1.211001931

### B3PW91/6-31G\* (gas phase)

E(RB+HF-PW91) = -757.487217816

|                                              |                             |
|----------------------------------------------|-----------------------------|
| Zero-point correction=                       | 0.084121 (Hartree/Particle) |
| Thermal correction to Energy=                | 0.091491                    |
| Thermal correction to Enthalpy=              | 0.092435                    |
| Thermal correction to Gibbs Free Energy=     | 0.052324                    |
| Sum of electronic and zero-point Energies=   | -757.403097                 |
| Sum of electronic and thermal Energies=      | -757.395727                 |
| Sum of electronic and thermal Enthalpies=    | -757.394783                 |
| Sum of electronic and thermal Free Energies= | -757.434894                 |

|       | E (Thermal)<br>KCal/Mol | CV<br>Cal/Mol-Kelvin | S<br>Cal/Mol-Kelvin |
|-------|-------------------------|----------------------|---------------------|
| Total | 57.411                  | 25.761               | 84.421              |

O,0,-1.7716766501,0.8685495412,0.131962634  
 C,0,-2.0033817581,-0.4975856174,-0.0699806019  
 N,0,-0.9053390121,0.1061225667,-0.7745130141  
 S,0,0.6394633125,-0.2021219516,0.0524744096  
 C,0,1.3740569123,1.4137569593,-0.1461881716  
 O,0,1.3069743792,-1.1716178602,-0.8084795337  
 O,0,0.432829649,-0.4637422942,1.4753043663  
 H,0,-2.8553136676,-0.7590294783,-0.695948213  
 H,0,-1.7937854336,-1.138197997,0.786401006  
 H,0,2.3768284482,1.3586744175,0.2836920125  
 H,0,0.7645194609,2.1406519986,0.3932525711  
 H,0,1.4228603591,1.6465197153,-1.2110144653

### BB1K/6-31G\* (gas phase)

E(RB+HF-B95) = -757.546275417

|                                              | E (Thermal)<br>KCal/Mol | CV<br>Cal/Mol-Kelvin        | S<br>Cal/Mol-Kelvin |
|----------------------------------------------|-------------------------|-----------------------------|---------------------|
| Total                                        | 92.200                  | 23.293                      | 78.787              |
| Zero-point correction=                       |                         | 0.087091 (Hartree/Particle) |                     |
| Thermal correction to Energy=                |                         | 0.094120                    |                     |
| Thermal correction to Enthalpy=              |                         | 0.095064                    |                     |
| Thermal correction to Gibbs Free Energy=     |                         | 0.055757                    |                     |
| Sum of electronic and zero-point Energies=   |                         | -757.459184                 |                     |
| Sum of electronic and thermal Energies=      |                         | -757.452155                 |                     |
| Sum of electronic and thermal Enthalpies=    |                         | -757.451211                 |                     |
| Sum of electronic and thermal Free Energies= |                         | -757.490518                 |                     |

|       | E (Thermal)<br>KCal/Mol | CV<br>Cal/Mol-Kelvin | S<br>Cal/Mol-Kelvin |
|-------|-------------------------|----------------------|---------------------|
| Total | 59.061                  | 24.725               | 82.729              |

O,0,-1.7077348974,0.8645345123,0.1223202686  
 C,0,-1.9730151384,-0.4826593944,-0.0606116642  
 N,0,-0.879126293,0.0874384197,-0.7704347672  
 S,0,0.6295243764,-0.2030131957,0.0348399862  
 C,0,1.3434861421,1.3979576586,-0.1445077505  
 O,0,1.3061549667,-1.1561829224,-0.805785909  
 O,0,0.4044831673,-0.4691010856,1.4353732632  
 H,0,-2.8306962696,-0.725327718,-0.6724906517  
 H,0,-1.7677511797,-1.11211701,0.7955496977  
 H,0,2.3318429666,1.3549731,0.303029357  
 H,0,0.7190818235,2.112931832,0.3806465684  
 H,0,1.4117863355,1.6325458036,-1.2009653984

### BPW91/6-31G\* (gas phase)

E(RB-PW91) = -757.653205225

Zero-point correction= 0.080914 (Hartree/Particle)  
Thermal correction to Energy= 0.088658  
Thermal correction to Enthalpy= 0.089602  
Thermal correction to Gibbs Free Energy= 0.048671  
Sum of electronic and zero-point Energies= -757.572291  
Sum of electronic and thermal Energies= -757.564547  
Sum of electronic and thermal Enthalpies= -757.563603  
Sum of electronic and thermal Free Energies= -757.604534

|       | E (Thermal)<br>KCal/Mol | CV<br>Cal/Mol-Kelvin | S<br>Cal/Mol-Kelvin |
|-------|-------------------------|----------------------|---------------------|
| Total | 55.634                  | 26.942               | 86.147              |

O,0,-1.8231618254,0.8774926257,0.1356261667  
C,0,-2.0298525203,-0.5067676112,-0.0756053747  
N,0,-0.9377367654,0.1247396839,-0.7980203366  
S,0,0.6524123874,-0.2087963145,0.0627548157  
C,0,1.4005087371,1.4269789542,-0.1454196826  
O,0,1.3232165381,-1.190579981,-0.8159007817  
O,0,0.4486488122,-0.4639328552,1.5079528165  
H,0,-2.8892132353,-0.7859725734,-0.6974860014  
H,0,-1.7984572011,-1.1543954986,0.7798813359  
H,0,2.4113453531,1.3683820016,0.2808799636  
H,0,0.789633967,2.1577577643,0.3999431148  
H,0,1.4406917525,1.6570738043,-1.2176430362

### MPWLYP1M/6-31G\* (gas phase)

E(RmPW+HF-LYP) = -757.671368410

Zero-point correction= 0.083646 (Hartree/Particle)  
Thermal correction to Energy= 0.091073  
Thermal correction to Enthalpy= 0.092018  
Thermal correction to Gibbs Free Energy= 0.051797  
Sum of electronic and zero-point Energies= -757.587722  
Sum of electronic and thermal Energies= -757.580295  
Sum of electronic and thermal Enthalpies= -757.579351  
Sum of electronic and thermal Free Energies= -757.619572

|       | E (Thermal)<br>KCal/Mol | CV<br>Cal/Mol-Kelvin | S<br>Cal/Mol-Kelvin |
|-------|-------------------------|----------------------|---------------------|
| Total | 57.149                  | 25.993               | 84.652              |

O,0,-1.7650904369,0.8824946068,0.1120572889  
C,0,-2.0113600005,-0.4901580821,-0.0643672856  
N,0,-0.9033615119,0.0820583443,-0.7900799249  
S,0,0.6518159719,-0.2162197067,0.0457471276  
C,0,1.3723197375,1.4188514756,-0.1426671308  
O,0,1.3348535262,-1.1767371537,-0.8193957477  
O,0,0.4428045719,-0.4890782133,1.4702535634  
H,0,-2.8697048213,-0.7539742791,-0.6800158093  
H,0,-1.8067138549,-1.116162437,0.8030889296  
H,0,2.371745116,1.3743986435,0.295349014  
H,0,0.7460161754,2.1331962751,0.3935871358  
H,0,1.4247115265,1.6533105264,-1.2065941609

### MPWB1K/6-31G\* (gas phase)

E(RmPW+HF-B95) = -757.545147172

|                                              |                             |
|----------------------------------------------|-----------------------------|
| Zero-point correction=                       | 0.087374 (Hartree/Particle) |
| Thermal correction to Energy=                | 0.094381                    |
| Thermal correction to Enthalpy=              | 0.095325                    |
| Thermal correction to Gibbs Free Energy=     | 0.056059                    |
| Sum of electronic and zero-point Energies=   | -757.457773                 |
| Sum of electronic and thermal Energies=      | -757.450766                 |
| Sum of electronic and thermal Enthalpies=    | -757.449822                 |
| Sum of electronic and thermal Free Energies= | -757.489088                 |

|       | E (Thermal)<br>KCal/Mol | CV<br>Cal/Mol-Kelvin | S<br>Cal/Mol-Kelvin |
|-------|-------------------------|----------------------|---------------------|
| Total | 59.225                  | 24.633               | 82.643              |

O,0,-1.7005167334,0.8648264001,0.1202813309  
C,0,-1.9698253106,-0.4804419831,-0.0594376691  
N,0,-0.8760974873,0.0849418008,-0.7702414467  
S,0,0.629074011,-0.2036450041,0.032870295  
C,0,1.339794981,1.3960885069,-0.144185724  
O,0,1.3068568854,-1.1546823004,-0.8060809426  
O,0,0.4027439357,-0.4705972908,1.4312428768  
H,0,-2.8281032035,-0.721306316,-0.6697767775  
H,0,-1.7653449455,-1.1082770795,0.7972151416  
H,0,2.3265042112,1.3550848635,0.3055204988  
H,0,0.7128932885,2.1091281951,0.3793497045  
H,0,1.4100563676,1.6308602073,-1.1997942876

### MPW1B95/6-31G\* (gas phase)

E(RmPW+HF-B95) = -757.574510652

|                                              |             |
|----------------------------------------------|-------------|
| Thermal correction to Energy=                | 0.092738    |
| Thermal correction to Enthalpy=              | 0.093682    |
| Thermal correction to Gibbs Free Energy=     | 0.054104    |
| Sum of electronic and zero-point Energies=   | -757.488935 |
| Sum of electronic and thermal Energies=      | -757.481773 |
| Sum of electronic and thermal Enthalpies=    | -757.480829 |
| Sum of electronic and thermal Free Energies= | -757.520407 |

|       | E (Thermal)<br>KCal/Mol | CV<br>Cal/Mol-Kelvin | S<br>Cal/Mol-Kelvin |
|-------|-------------------------|----------------------|---------------------|
| Total | 58.194                  | 25.208               | 83.298              |

O,0,-1.715932445,0.8727951558,0.1188413942  
C,0,-1.9798979123,-0.4818313279,-0.0599676523  
N,0,-0.8858165293,0.0876713929,-0.783696495  
S,0,0.6361051069,-0.2097734375,0.0355492682  
C,0,1.3481377829,1.401725092,-0.1434977591  
O,0,1.3177652235,-1.1648486229,-0.8121261961  
O,0,0.4086162089,-0.4766179827,1.4437043859  
H,0,-2.8439326629,-0.7293944351,-0.6673864804  
H,0,-1.7679697327,-1.1109843003,0.7994718201  
H,0,2.3385266988,1.36209545,0.3068876998  
H,0,0.7164293588,2.1144853015,0.38221486  
H,0,1.4160049024,1.6366577142,-1.2030318453

## MPWLYP1M/6-31G\* (gas phase)

E(RmPW+HF-LYP) = -757.566197933

|                                              |                             |
|----------------------------------------------|-----------------------------|
| Zero-point correction=                       | 0.080988 (Hartree/Particle) |
| Thermal correction to Energy=                | 0.088725                    |
| Thermal correction to Enthalpy=              | 0.089669                    |
| Thermal correction to Gibbs Free Energy=     | 0.048792                    |
| Sum of electronic and zero-point Energies=   | -757.485210                 |
| Sum of electronic and thermal Energies=      | -757.477473                 |
| Sum of electronic and thermal Enthalpies=    | -757.476529                 |
| Sum of electronic and thermal Free Energies= | -757.517406                 |

|       | E (Thermal)<br>KCal/Mol | CV<br>Cal/Mol-Kelvin | S<br>Cal/Mol-Kelvin |
|-------|-------------------------|----------------------|---------------------|
| Total | 55.676                  | 26.989               | 86.033              |

O,0,-1.7977697477,0.8971127316,0.1033322238  
C,0,-2.0344114234,-0.491882615,-0.0645594832  
N,0,-0.9270121285,0.0835686117,-0.8180631274  
S,0,0.6683617819,-0.2294508003,0.049515987  
C,0,1.389758918,1.4309526071,-0.140116968  
O,0,1.3619618626,-1.1940076229,-0.8310272652  
O,0,0.4592456088,-0.5031836484,1.4913992994  
H,0,-2.9026917386,-0.770037857,-0.6713531972  
H,0,-1.8139217298,-1.1167761218,0.8077132033  
H,0,2.3929258731,1.3904562579,0.3023567005  
H,0,0.7513845441,2.1413927903,0.3975645886  
H,0,1.4402041795,1.6638356667,-1.2097989615

## PBE1KCIS/6-31G\* (gas phase)

E(RPBE+HF-KCIS) = -757.175662918

|                                              |                             |
|----------------------------------------------|-----------------------------|
| Zero-point correction=                       | 0.084163 (Hartree/Particle) |
| Thermal correction to Energy=                | 0.091481                    |
| Thermal correction to Enthalpy=              | 0.092425                    |
| Thermal correction to Gibbs Free Energy=     | 0.052446                    |
| Sum of electronic and zero-point Energies=   | -757.091500                 |
| Sum of electronic and thermal Energies=      | -757.084182                 |
| Sum of electronic and thermal Enthalpies=    | -757.083237                 |
| Sum of electronic and thermal Free Energies= | -757.123217                 |

|       | E (Thermal)<br>KCal/Mol | CV<br>Cal/Mol-Kelvin | S<br>Cal/Mol-Kelvin |
|-------|-------------------------|----------------------|---------------------|
| Total | 57.405                  | 25.669               | 84.143              |

O,0,-1.7685861902,0.8688769686,0.129418888  
C,0,-2.0008113927,-0.4959303702,-0.0701646302  
N,0,-0.904586183,0.1079834768,-0.7714645986  
S,0,0.6391819194,-0.2013685146,0.0518319492  
C,0,1.3709638584,1.4103627871,-0.1459382956  
O,0,1.3053800406,-1.1702009513,-0.8108704672  
O,0,0.4359037637,-0.4635153494,1.4751813793  
H,0,-2.853052158,-0.759481265,-0.6967260836  
H,0,-1.7935029103,-1.1360833691,0.7883904484  
H,0,2.3735452133,1.3577575691,0.28584652  
H,0,0.7609608969,2.1387249698,0.3921261228  
H,0,1.4226391418,1.6448540482,-1.2106682327

## PBE1W/6-31G\* (gas phase)

E(RPBE+HF-PBE) = -809.235346079

Zero-point correction= 0.128924 (Hartree/Particle)  
 Thermal correction to Energy= 0.134531  
 Thermal correction to Enthalpy= 0.135475  
 Thermal correction to Gibbs Free Energy= 0.099134  
 Sum of electronic and zero-point Energies= -809.106422  
 Sum of electronic and thermal Energies= -809.100815  
 Sum of electronic and thermal Enthalpies= -809.099871  
 Sum of electronic and thermal Free Energies= -809.136212

|       | E (Thermal)<br>KCal/Mol | CV<br>Cal/Mol-Kelvin | S<br>Cal/Mol-Kelvin |
|-------|-------------------------|----------------------|---------------------|
| Total | 84.419                  | 18.684               | 76.486              |

O,0,-1.5164177096,0.7457977907,0.1221151658  
 C,0,-1.7306664358,-0.4023858917,-0.072235177  
 N,0,-0.7628712184,0.1309850992,-0.5729385686  
 S,0,0.5205705122,-0.0971244143,0.0291554529  
 C,0,1.1656335455,1.251995731,-0.1441350945  
 O,0,1.0741428171,-0.9477688989,-0.6959641324  
 O,0,0.3699012038,-0.3289848412,1.2483567763  
 H,0,-2.4245586412,-0.6055429865,-0.6397036693  
 H,0,-1.6034366854,-0.9584336087,0.6501329827  
 H,0,2.0096753389,1.1847160334,0.2151714833  
 H,0,0.6743881629,1.8774026233,0.3165811408  
 H,0,1.21167511,1.4513233638,-1.03957336

### PBELYP1W/6-31G\* (gas phase)

E(RPBE+HF-V5LYP) = -795.032006542

Zero-point correction= 0.118909 (Hartree/Particle)  
 Thermal correction to Energy= 0.124733  
 Thermal correction to Enthalpy= 0.125677  
 Thermal correction to Gibbs Free Energy= 0.088848  
 Sum of electronic and zero-point Energies= -794.913098  
 Sum of electronic and thermal Energies= -794.907273  
 Sum of electronic and thermal Enthalpies= -794.906329  
 Sum of electronic and thermal Free Energies= -794.943158

|       | E (Thermal)<br>KCal/Mol | CV<br>Cal/Mol-Kelvin | S<br>Cal/Mol-Kelvin |
|-------|-------------------------|----------------------|---------------------|
| Total | 78.271                  | 19.604               | 77.513              |

O,0,-1.545532779,0.7747362958,0.1094123433  
 C,0,-1.788135855,-0.4176867757,-0.0652395644  
 N,0,-0.7810523459,0.1014375613,-0.6164939928  
 S,0,0.5494081326,-0.1262949495,0.0234260139  
 C,0,1.2008739434,1.2858882221,-0.1424958558  
 O,0,1.1404369936,-0.99141025,-0.7252402687  
 O,0,0.3815824134,-0.3751829616,1.2788522392  
 H,0,-2.5193689026,-0.6253722058,-0.6390426728  
 H,0,-1.6547031863,-0.978557372,0.6943928293  
 H,0,2.074097572,1.231187386,0.2414005129  
 H,0,0.6733020035,1.9265592715,0.3292815806  
 H,0,1.2571280103,1.4966757779,-1.0712901645

### RHF/6-31G\* (gas phase)

E(RHF) = -755.005421421

Zero-point correction= 0.091519 (Hartree/Particle)  
 Thermal correction to Energy= 0.098258  
 Thermal correction to Enthalpy= 0.099202  
 Thermal correction to Gibbs Free Energy= 0.060398  
 Sum of electronic and zero-point Energies= -754.913902  
 Sum of electronic and thermal Energies= -754.907163  
 Sum of electronic and thermal Enthalpies= -754.906219  
 Sum of electronic and thermal Free Energies= -754.945023

|       | E (Thermal)<br>KCal/Mol | CV<br>Cal/Mol-Kelvin | S<br>Cal/Mol-Kelvin |
|-------|-------------------------|----------------------|---------------------|
| Total | 61.658                  | 23.489               | 81.670              |

O,0,-1.7297821441,0.8383020502,0.1386037649  
 C,0,-1.991491587,-0.4968554966,-0.0678168216  
 N,0,-0.8722882947,0.0740846645,-0.7175584012  
 S,0,0.628323131,-0.1877777585,0.0453365441  
 C,0,1.3570161984,1.4071894454,-0.1514082297  
 O,0,1.2890325263,-1.139379122,-0.7870735742  
 O,0,0.4418434641,-0.4565120805,1.4360452404  
 H,0,-2.819854389,-0.7241883715,-0.7123178186  
 H,0,-1.8360899523,-1.1343602207,0.7820299886  
 H,0,2.3510575995,1.3488311666,0.2712230816  
 H,0,0.7630213303,2.1325469368,0.3844212319  
 H,0,1.4072481175,1.6400987864,-1.204522006

### TPSS1KCIS/6-31G\* (gas phase)

E(RTPSS+HF-KCIS) = -757.709022254

Zero-point correction= 0.083893 (Hartree/Particle)  
 Thermal correction to Energy= 0.091347  
 Thermal correction to Enthalpy= 0.092291  
 Thermal correction to Gibbs Free Energy= 0.052021  
 Sum of electronic and zero-point Energies= -757.625129  
 Sum of electronic and thermal Energies= -757.617675  
 Sum of electronic and thermal Enthalpies= -757.616731  
 Sum of electronic and thermal Free Energies= -757.657001

|       | E (Thermal)<br>KCal/Mol | CV<br>Cal/Mol-Kelvin | S<br>Cal/Mol-Kelvin |
|-------|-------------------------|----------------------|---------------------|
| Total | 57.321                  | 26.004               | 84.755              |

O,0,-1.7696099804,0.879214646,0.1211147622  
 C,0,-2.0064460411,-0.4936699933,-0.0672360128  
 N,0,-0.9070661397,0.0948494535,-0.7904785495  
 S,0,0.6467844849,-0.2119806429,0.0487384637  
 C,0,1.3730556959,1.4168442451,-0.1435653925  
 O,0,1.3258308865,-1.1773758859,-0.8182801829  
 O,0,0.4342607246,-0.4776080997,1.4765340071  
 H,0,-2.8636347252,-0.7559206708,-0.6814324106  
 H,0,-1.7931399659,-1.1229110607,0.79376008  
 H,0,2.371686967,1.3681897416,0.2917447833  
 H,0,0.752237197,2.1336221998,0.3925148734  
 H,0,1.4240768963,1.6487260675,-1.2064514216

### TPSSLYP1W/6-31G\* (gas phase)

E(RTPSS+HF-V5LYP) = -809.827205703

|                                              |                             |
|----------------------------------------------|-----------------------------|
| Zero-point correction=                       | 0.129909 (Hartree/Particle) |
| Thermal correction to Energy=                | 0.135525                    |
| Thermal correction to Enthalpy=              | 0.136469                    |
| Thermal correction to Gibbs Free Energy=     | 0.100106                    |
| Sum of electronic and zero-point Energies=   | -809.697297                 |
| Sum of electronic and thermal Energies=      | -809.691681                 |
| Sum of electronic and thermal Enthalpies=    | -809.690737                 |
| Sum of electronic and thermal Free Energies= | -809.727099                 |

|       | E (Thermal)<br>KCal/Mol | CV<br>Cal/Mol-Kelvin | S<br>Cal/Mol-Kelvin |
|-------|-------------------------|----------------------|---------------------|
| Total | 85.043                  | 18.689               | 76.531              |

O,0,-1.5052568812,0.7535611574,0.110767914  
C,0,-1.7363302011,-0.3979372138,-0.0680671803  
N,0,-0.7558600801,0.1090880849,-0.5811664324  
S,0,0.5288057752,-0.108183776,0.0238589932  
C,0,1.1629664167,1.2557620296,-0.1420049006  
O,0,1.0962477119,-0.9500440701,-0.7009267141  
O,0,0.3737107744,-0.346698698,1.241528813  
H,0,-2.4332330769,-0.5960069264,-0.6279728047  
H,0,-1.6169894095,-0.9427164365,0.6595571321  
H,0,2.0035000105,1.1975836225,0.2213238889  
H,0,0.6601666118,1.8713897732,0.3149366476  
H,0,1.2103083483,1.4561824531,-1.0348723568

## BP86/6-31G\* (gas phase)

E(RB-P86) = -757.720514557

|                                              |                             |
|----------------------------------------------|-----------------------------|
| Zero-point correction=                       | 0.132948 (Hartree/Particle) |
| Thermal correction to Energy=                | 0.139904                    |
| Thermal correction to Enthalpy=              | 0.140849                    |
| Thermal correction to Gibbs Free Energy=     | 0.103135                    |
| Sum of electronic and zero-point Energies=   | -196.395054                 |
| Sum of electronic and thermal Energies=      | -196.388098                 |
| Sum of electronic and thermal Enthalpies=    | -196.387154                 |
| Sum of electronic and thermal Free Energies= | -196.424867                 |

|       | E (Thermal)<br>KCal/Mol | CV<br>Cal/Mol-Kelvin | S<br>Cal/Mol-Kelvin |
|-------|-------------------------|----------------------|---------------------|
| Total | 87.791                  | 24.265               | 79.374              |

C,0,1.2819616616,0.050005017,-0.9182584002  
C,0,0.0901423395,0.1712741934,-0.0063676226  
C,0,0.0369062392,0.0164948498,1.336449644  
C,0,-1.2714235648,0.1811302623,2.0804998677  
C,0,1.2213190565,-0.3233431679,2.2132858135  
H,0,1.0425366657,-1.2659505147,2.7678180305  
H,0,2.1620238797,-0.4384001989,1.6514790044  
H,0,1.3806017477,0.4604625925,2.9802689071  
H,0,-1.2026857771,0.9835444548,2.842241796  
H,0,-2.1046260643,0.428148383,1.4001688538  
H,0,-1.5409682961,-0.7434118325,2.6295074057  
H,0,1.1171701932,-0.7330053928,-1.6845073234  
H,0,1.4554347584,0.9937344136,-1.4720462193  
H,0,2.2140980887,-0.1982975725,-0.3843047544  
H,0,-0.8536929278,0.4188355128,-0.5163890027



## Sulfonyloxaziridine 2 (isomer-2)

B3LYP/6-31+G\*\*

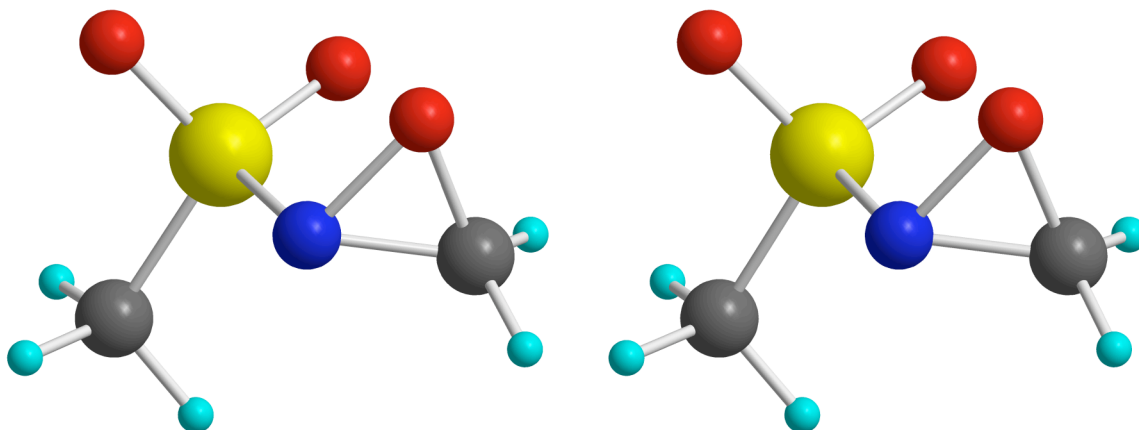

Filename: oxazsmb

E(RB+HF-LYP) = -757.686780445

|                                              |                             |
|----------------------------------------------|-----------------------------|
| Zero-point correction=                       | 0.082777 (Hartree/Particle) |
| Thermal correction to Energy=                | 0.090345                    |
| Thermal correction to Enthalpy=              | 0.091289                    |
| Thermal correction to Gibbs Free Energy=     | 0.050542                    |
| Sum of electronic and zero-point Energies=   | -757.604003                 |
| Sum of electronic and thermal Energies=      | -757.596436                 |
| Sum of electronic and thermal Enthalpies=    | -757.595491                 |
| Sum of electronic and thermal Free Energies= | -757.636238                 |

|       | E (Thermal) | CV             | S              |
|-------|-------------|----------------|----------------|
|       | KCal/Mol    | Cal/Mol-Kelvin | Cal/Mol-Kelvin |
| Total | 56.692      | 26.285         | 85.758         |

O,0,1.4507635538,1.4353719409,-0.0641396064  
S,0,0.8005504522,0.132505253,0.0520511878  
O,0,0.5942575935,-0.4997975131,1.3637783803  
N,0,-0.7545752759,0.2481830137,-0.8572205316  
C,0,-1.9025180001,-0.1665859158,-0.0841509807  
O,0,-1.6138236211,1.2121650468,-0.1488842427  
C,0,1.6016878532,-1.0415871254,-1.0529816988  
H,0,-2.7501087019,-0.5089747687,-0.6762284744  
H,0,-1.7380158935,-0.6343874342,0.8852971064  
H,0,2.6040106776,-1.1975978871,-0.6492090614  
H,0,1.0385565232,-1.9758821856,-1.0486896639  
H,0,1.6471558391,-0.6020514246,-2.0492984146

B3LYP/6-31G\*

E(RB+HF-LYP) = -757.662692619

E (Cosmo, CHCl<sub>3</sub>) E(RB+HF-LYP) = -757.664493634

|                                              |                             |
|----------------------------------------------|-----------------------------|
| Zero-point correction=                       | 0.083417 (Hartree/Particle) |
| Thermal correction to Energy=                | 0.090939                    |
| Thermal correction to Enthalpy=              | 0.091883                    |
| Thermal correction to Gibbs Free Energy=     | 0.051215                    |
| Sum of electronic and zero-point Energies=   | -757.579275                 |
| Sum of electronic and thermal Energies=      | -757.571754                 |
| Sum of electronic and thermal Enthalpies=    | -757.570810                 |
| Sum of electronic and thermal Free Energies= | -757.611477                 |

|       |             |                |                |
|-------|-------------|----------------|----------------|
|       | E (Thermal) | CV             | S              |
|       | KCAL/MOL    | CAL/MOL-KELVIN | CAL/MOL-KELVIN |
| TOTAL | 57.065      | 26.082         | 85.592         |

Standard orientation:

| Center Number | Atomic Number | Atomic Type | Coordinates (Angstroms) |           |           |
|---------------|---------------|-------------|-------------------------|-----------|-----------|
|               |               |             | X                       | Y         | Z         |
| 1             | 6             | 0           | 1.957079                | -0.674503 | 0.172367  |
| 2             | 8             | 0           | 1.936076                | 0.653067  | -0.292488 |
| 3             | 7             | 0           | 0.892307                | -0.296792 | -0.726659 |
| 4             | 16            | 0           | -0.625158               | 0.158330  | 0.129087  |
| 5             | 8             | 0           | -0.986264               | 1.493087  | -0.336650 |
| 6             | 8             | 0           | -0.531566               | -0.149567 | 1.561801  |
| 7             | 6             | 0           | -1.682236               | -1.063187 | -0.667813 |
| 8             | 1             | 0           | 1.727036                | -0.810141 | 1.228137  |
| 9             | 1             | 0           | 2.710963                | -1.329100 | -0.264464 |
| 10            | 1             | 0           | -1.338434               | -2.064426 | -0.401249 |
| 11            | 1             | 0           | -1.647517               | -0.905142 | -1.746297 |
| 12            | 1             | 0           | -2.690691               | -0.893479 | -0.283547 |

### B3LYP/6-31+G\*\* (PCM)

Filename: oxazsmbPCM

E(RB+HF-LYP) = -757.698209050

|                                              |                             |
|----------------------------------------------|-----------------------------|
| Zero-point correction=                       | 0.082484 (Hartree/Particle) |
| Thermal correction to Energy=                | 0.090043                    |
| Thermal correction to Enthalpy=              | 0.090987                    |
| Thermal correction to Gibbs Free Energy=     | 0.050352                    |
| Sum of electronic and zero-point Energies=   | -757.615725                 |
| Sum of electronic and thermal Energies=      | -757.608166                 |
| Sum of electronic and thermal Enthalpies=    | -757.607222                 |
| Sum of electronic and thermal Free Energies= | -757.647857                 |

|       |             |                |                |
|-------|-------------|----------------|----------------|
|       | E (Thermal) | CV             | S              |
|       | KCal/Mol    | Cal/Mol-Kelvin | Cal/Mol-Kelvin |
| Total | 56.503      | 26.347         | 85.524         |

O,0,1.4851011133,1.4605253236,-0.1096171595  
S,0,0.8131381304,0.1658134024,0.0417011232  
O,0,0.6155657564,-0.4036719927,1.3851514864  
N,0,-0.7452420981,0.3266250787,-0.8377946414  
C,0,-1.8834393462,-0.1982106648,-0.1171365405  
O,0,-1.6215834859,1.1887436685,-0.0256246375  
C,0,1.5726893268,-1.0527048496,-1.0356434245  
H,0,-2.7240661776,-0.487497385,-0.7465880439  
H,0,-1.7128549899,-0.7647348198,0.7974486682  
H,0,2.5813462468,-1.2125774941,-0.6464652161  
H,0,0.9919524081,-1.9758858028,-0.9881268746  
H,0,1.6053341158,-0.6450634645,-2.0469807396

### Sulfonyloxaziridine 3 (isomer-3)

B3LYP/6-31+G\*\*

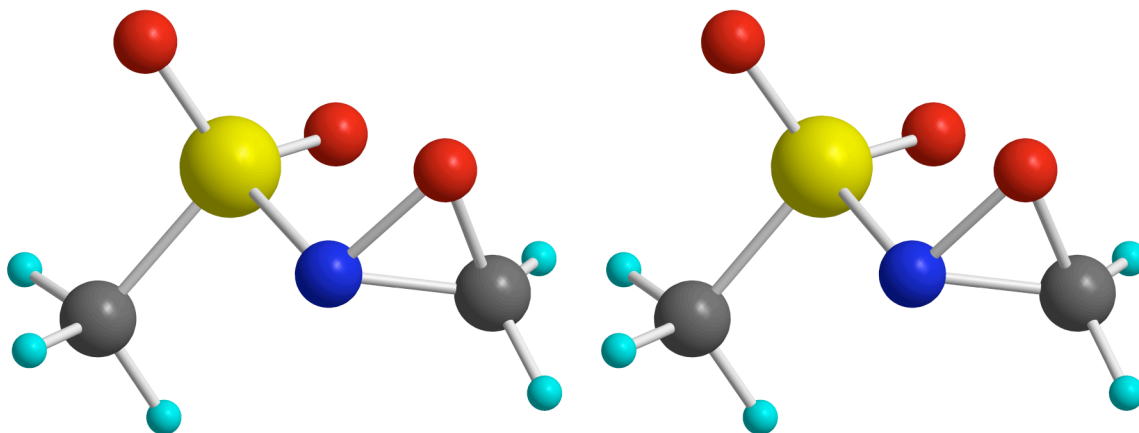

oxazsmc

E(RB+HF-LYP) = -757.683377244

|                                              |                             |
|----------------------------------------------|-----------------------------|
| Zero-point correction=                       | 0.082630 (Hartree/Particle) |
| Thermal correction to Energy=                | 0.090274                    |
| Thermal correction to Enthalpy=              | 0.091218                    |
| Thermal correction to Gibbs Free Energy=     | 0.049883                    |
| Sum of electronic and zero-point Energies=   | -757.600747                 |
| Sum of electronic and thermal Energies=      | -757.593104                 |
| Sum of electronic and thermal Enthalpies=    | -757.592159                 |
| Sum of electronic and thermal Free Energies= | -757.633494                 |

|       | E (Thermal)<br>KCal/Mol | CV<br>Cal/Mol-Kelvin | S<br>Cal/Mol-Kelvin |
|-------|-------------------------|----------------------|---------------------|
| Total | 56.648                  | 26.428               | 86.995              |

O,0,-2.5832063288,1.957104767,1.3412005613  
 S,0,-1.4020732098,1.5524258672,2.0960669195  
 C,0,-1.7990596278,0.0306505267,2.9899133627  
 N,0,-0.183692772,1.117405536,0.847638495  
 C,0,0.9329875196,0.3528767541,1.3237395162  
 O,0,-0.1032714287,-0.3489527733,0.6637565156  
 O,0,-0.7034959743,2.4810544309,2.9913740753  
 H,0,1.8569971101,0.486889989,0.7639717441  
 H,0,1.0431232222,0.1587195439,2.3905923012  
 H,0,-0.9147180502,-0.3561448557,3.495577236  
 H,0,-2.5467327141,0.3389318078,3.7237549063  
 H,0,-2.2139577461,-0.6933875936,2.2905703668

### B3LYP/6-31G\*

E(RB+HF-LYP) = -757.659048503

E (Cosmo, CHCl<sub>3</sub>) E(RB+HF-LYP) = -757.660376666

|                                              |                             |
|----------------------------------------------|-----------------------------|
| Zero-point correction=                       | 0.083379 (Hartree/Particle) |
| Thermal correction to Energy=                | 0.090919                    |
| Thermal correction to Enthalpy=              | 0.091863                    |
| Thermal correction to Gibbs Free Energy=     | 0.050980                    |
| Sum of electronic and zero-point Energies=   | -757.575669                 |
| Sum of electronic and thermal Energies=      | -757.568130                 |
| Sum of electronic and thermal Enthalpies=    | -757.567185                 |
| Sum of electronic and thermal Free Energies= | -757.608069                 |

|       | E (Thermal)<br>KCAL/MOL | CV<br>CAL/MOL-KELVIN | S<br>CAL/MOL-KELVIN |
|-------|-------------------------|----------------------|---------------------|
| TOTAL | 57.053                  | 26.182               | 86.046              |

Standard orientation:

| Center<br>Number | Atomic<br>Number | Atomic<br>Type | Coordinates (Angstroms) |           |           |
|------------------|------------------|----------------|-------------------------|-----------|-----------|
|                  |                  |                | X                       | Y         | Z         |
| 1                | 6                | 0              | -1.951858               | -0.436367 | -0.401462 |
| 2                | 8                | 0              | -1.825178               | 0.649534  | 0.490187  |
| 3                | 7                | 0              | -0.941534               | -0.535172 | 0.612801  |
| 4                | 16               | 0              | 0.720429                | -0.147605 | 0.043107  |
| 5                | 8                | 0              | 1.024322                | -1.153328 | -0.977660 |
| 6                | 8                | 0              | 1.513366                | -0.022206 | 1.259145  |
| 7                | 6                | 0              | 0.615124                | 1.483595  | -0.733327 |
| 8                | 1                | 0              | -1.662913               | -0.253044 | -1.437058 |
| 9                | 1                | 0              | -2.816881               | -1.082532 | -0.257912 |
| 10               | 1                | 0              | 0.301274                | 2.215321  | 0.009889  |
| 11               | 1                | 0              | -0.069257               | 1.463915  | -1.582052 |
| 12               | 1                | 0              | 1.631964                | 1.688850  | -1.076817 |

### B3LYP/6-31+G\*\* (PCM)

Filename: oxazsmcPCM

E(RB+HF-LYP) = -757.698208830

|                                              |                             |
|----------------------------------------------|-----------------------------|
| Zero-point correction=                       | 0.082483 (Hartree/Particle) |
| Thermal correction to Energy=                | 0.090042                    |
| Thermal correction to Enthalpy=              | 0.090986                    |
| Thermal correction to Gibbs Free Energy=     | 0.050351                    |
| Sum of electronic and zero-point Energies=   | -757.615726                 |
| Sum of electronic and thermal Energies=      | -757.608167                 |
| Sum of electronic and thermal Enthalpies=    | -757.607223                 |
| Sum of electronic and thermal Free Energies= | -757.647857                 |

|                                               | E (Thermal)<br>KCal/Mol | CV<br>Cal/Mol-Kelvin | S<br>Cal/Mol-Kelvin |
|-----------------------------------------------|-------------------------|----------------------|---------------------|
| Total                                         | 56.502                  | 26.348               | 85.523              |
| O,0,1.4863353053,1.4599522414,-0.1098993244   |                         |                      |                     |
| S,0,0.8137012285,0.1655049747,0.0413325305    |                         |                      |                     |
| O,0,0.6168002592,-0.4046837293,1.3845840422   |                         |                      |                     |
| N,0,-0.7453627592,0.3280018666,-0.8367712897  |                         |                      |                     |
| C,0,-1.8829311997,-0.1975567106,-0.115622594  |                         |                      |                     |
| O,0,-1.6206161455,1.1892257479,-0.0225120311  |                         |                      |                     |
| C,0,1.5715658281,-1.0530197992,-1.0371938512  |                         |                      |                     |
| H,0,-2.7242519706,-0.4857966286,-0.7446175388 |                         |                      |                     |
| H,0,-1.7115384111,-0.7654030642,0.7979843848  |                         |                      |                     |
| H,0,2.579640157,-1.2155394692,-0.6476494822   |                         |                      |                     |
| H,0,0.9890181196,-1.9751572322,-0.991313353   |                         |                      |                     |
| H,0,1.6055805883,-0.6441671974,-2.0479974931  |                         |                      |                     |

### *trans-3-phenyl-2-methanesulfonyloxaziridine (isomer-1)*

B3LYP/6-31+G\*\*

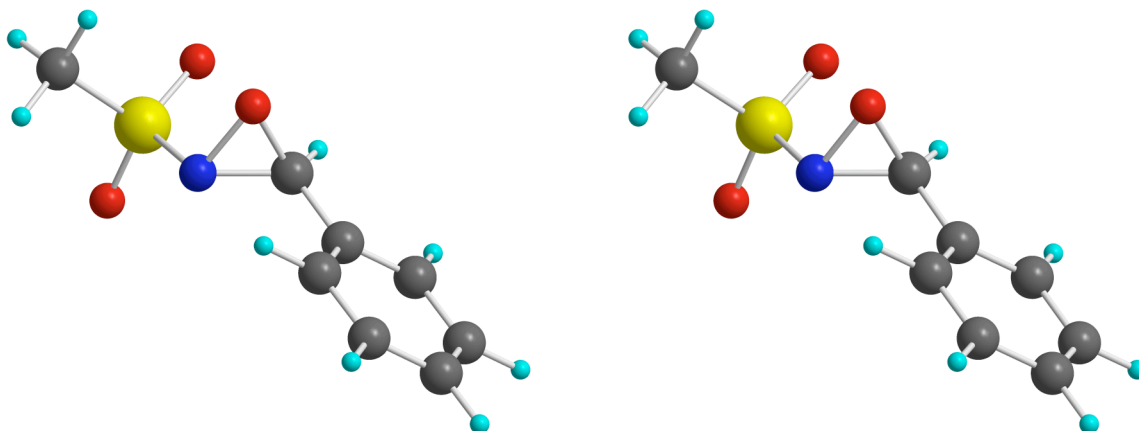

Filename: b3BBoxsmtransa  
 E(RB+HF-LYP) = -988.767780998

|                                              |                             |
|----------------------------------------------|-----------------------------|
| Zero-point correction=                       | 0.163589 (Hartree/Particle) |
| Thermal correction to Energy=                | 0.175721                    |
| Thermal correction to Enthalpy=              | 0.176665                    |
| Thermal correction to Gibbs Free Energy=     | 0.123718                    |
| Sum of electronic and zero-point Energies=   | -988.604192                 |
| Sum of electronic and thermal Energies=      | -988.592060                 |
| Sum of electronic and thermal Enthalpies=    | -988.591116                 |
| Sum of electronic and thermal Free Energies= | -988.644063                 |

|       | E (Thermal) | CV             | S              |
|-------|-------------|----------------|----------------|
|       | KCal/Mol    | Cal/Mol-Kelvin | Cal/Mol-Kelvin |
| Total | 110.267     | 45.299         | 111.436        |

C,0,-2.3477575362,-0.4687138084,-1.1536662221  
 C,0,-1.7342456481,-0.3428417621,0.0914442543  
 C,0,-2.4369012551,-0.6893010526,1.2541886049  
 C,0,-3.7522937098,-1.1590076734,1.1599360206  
 C,0,-4.3640220545,-1.2871579776,-0.0895075172  
 C,0,-3.6620357182,-0.9420584215,-1.2464000816  
 C,0,-1.8126824954,-0.5637137713,2.5964958148  
 O,0,-0.8904217932,0.4888125217,2.8341241585  
 N,0,-0.405277992,-0.9032659844,2.7493224904  
 S,0,-0.0149325456,-1.4880020791,4.4019258807  
 O,0,0.2288591478,-2.920576211,4.2170077926  
 O,0,-0.9920059228,-1.007640864,5.3874656482  
 C,0,1.5400300712,-0.6172912177,4.6421174421  
 H,0,-2.4575060566,-0.7737179579,3.4500989589  
 H,0,1.9143497446,-0.9236637253,5.6207123277  
 H,0,1.3379418464,0.4540573852,4.6209656719  
 H,0,2.225360578,-0.9170545464,3.8491861994  
 H,0,-4.2974939017,-1.4246909329,2.0620310602  
 H,0,-5.3840539434,-1.6529546423,-0.1572853518  
 H,0,-4.1363100166,-1.0396216378,-2.2185760707  
 H,0,-1.8027037571,-0.1993638762,-2.0534252958  
 H,0,-0.7161920419,0.0235232348,0.1725282141

### B3LYP/6-31G\*

E(RB+HF-LYP) = -988.729652244  
 E (Cosmo, CHCl3) E(RB+HF-LYP) = -988.727489141

|                                          |                             |
|------------------------------------------|-----------------------------|
| Zero-point correction=                   | 0.164511 (Hartree/Particle) |
| Thermal correction to Energy=            | 0.176548                    |
| Thermal correction to Enthalpy=          | 0.177492                    |
| Thermal correction to Gibbs Free Energy= | 0.124909                    |

Sum of electronic and zero-point Energies= -988.565141  
 Sum of electronic and thermal Energies= -988.553104  
 Sum of electronic and thermal Enthalpies= -988.552160  
 Sum of electronic and thermal Free Energies= -988.604744

|       | E (Thermal)<br>KCAL/MOL | CV<br>CAL/MOL-KELVIN | S<br>CAL/MOL-KELVIN |
|-------|-------------------------|----------------------|---------------------|
| TOTAL | 110.786                 | 45.018               | 110.672             |

Standard orientation:

| Center<br>Number | Atomic<br>Number | Atomic<br>Type |   | Coordinates (Angstroms) |           |           |
|------------------|------------------|----------------|---|-------------------------|-----------|-----------|
|                  |                  |                |   | X                       | Y         | Z         |
| 1                | 6                | 0              | C | -0.123327               | -0.216316 | -0.597181 |
| 2                | 8                | 0              | O | 0.529902                | 0.880662  | -1.208324 |
| 3                | 7                | 0              | N | 0.842728                | 0.533238  | 0.195214  |
| 4                | 16               | 0              | S | 2.445917                | -0.263936 | 0.240188  |
| 5                | 8                | 0              | O | 2.635223                | -1.156506 | -0.908059 |
| 6                | 8                | 0              | O | 2.554457                | -0.760945 | 1.612027  |
| 7                | 6                | 0              | C | 3.476027                | 1.195125  | 0.021125  |
| 8                | 6                | 0              | C | -1.563743               | -0.098107 | -0.255765 |
| 9                | 6                | 0              | C | -2.362681               | -1.245854 | -0.265839 |
| 10               | 6                | 0              | C | -3.716774               | -1.160078 | 0.060165  |
| 11               | 6                | 0              | C | -4.274778               | 0.074836  | 0.392060  |
| 12               | 6                | 0              | C | -3.478481               | 1.224530  | 0.397578  |
| 13               | 6                | 0              | C | -2.126636               | 1.141165  | 0.075469  |
| 14               | 1                | 0              | H | 0.206901                | -1.184510 | -0.974082 |
| 15               | 1                | 0              | H | 3.265346                | 1.893286  | 0.832252  |
| 16               | 1                | 0              | H | 3.248100                | 1.632160  | -0.952247 |
| 17               | 1                | 0              | H | 4.513317                | 0.855203  | 0.059128  |
| 18               | 1                | 0              | H | -1.924898               | -2.206251 | -0.527828 |
| 19               | 1                | 0              | H | -4.332735               | -2.054788 | 0.052207  |
| 20               | 1                | 0              | H | -5.329420               | 0.143900  | 0.644431  |
| 21               | 1                | 0              | H | -3.914221               | 2.186342  | 0.653297  |
| 22               | 1                | 0              | H | -1.500445               | 2.027487  | 0.072509  |

### MPW1K/6-31+G\*

E(RmPW+HF-PW91) = -988.556345263

Zero-point correction= 0.170493 (Hartree/Particle)  
 Thermal correction to Energy= 0.182066  
 Thermal correction to Enthalpy= 0.183010  
 Thermal correction to Gibbs Free Energy= 0.131347  
 Sum of electronic and zero-point Energies= -988.385852  
 Sum of electronic and thermal Energies= -988.374280  
 Sum of electronic and thermal Enthalpies= -988.373336  
 Sum of electronic and thermal Free Energies= -988.424999

|       | E (Thermal)<br>KCAL/MOL | CV<br>CAL/MOL-KELVIN | S<br>CAL/MOL-KELVIN |
|-------|-------------------------|----------------------|---------------------|
| TOTAL | 114.248                 | 43.161               | 108.734             |

C,0,-0.1064574627,-0.2528239486,-0.5836175316  
 O,0,0.5406681916,0.8122389902,-1.2093131184  
 N,0,0.8466302826,0.5125890068,0.1638534865  
 S,0,2.4091093967,-0.2326726364,0.2452583347  
 O,0,2.6039239917,-1.1451176858,-0.8580529629  
 O,0,2.5136054491,-0.689831911,1.6079923704  
 C,0,3.4120669521,1.196354921,-0.002851901  
 C,0,-1.5374168597,-0.1202267009,-0.2463718356

C,0,-2.3485027481,-1.2452747285,-0.2903108258  
 C,0,-3.6957022969,-1.1433663644,0.02284592  
 C,0,-4.2301404429,0.0849830039,0.3764482845  
 C,0,-3.4186688911,1.212174738,0.4180075131  
 C,0,-2.0744202338,1.1119322974,0.1089836222  
 H,0,0.222102224,-1.2230959735,-0.9373788433  
 H,0,3.1976546507,1.9121898911,0.7832547804  
 H,0,3.1967935449,1.6047190589,-0.9848078151  
 H,0,4.4454926273,0.865595354,0.0518796576  
 H,0,-1.9285906461,-2.2022199327,-0.5690560538  
 H,0,-4.3243803545,-2.0209529368,-0.0111763485  
 H,0,-5.2796911153,0.1669879492,0.6193827813  
 H,0,-3.837012358,2.1692266609,0.6934938495  
 H,0,-1.4346600593,1.981354609,0.1394904428

### B3LYP/6-31+G\*\* (PCM)

E(RB+HF-LYP) = -988.780890618

|                                              |                             |
|----------------------------------------------|-----------------------------|
| Zero-point correction=                       | 0.162652 (Hartree/Particle) |
| Thermal correction to Energy=                | 0.174800                    |
| Thermal correction to Enthalpy=              | 0.175745                    |
| Thermal correction to Gibbs Free Energy=     | 0.122835                    |
| Sum of electronic and zero-point Energies=   | -988.618239                 |
| Sum of electronic and thermal Energies=      | -988.606090                 |
| Sum of electronic and thermal Enthalpies=    | -988.605146                 |
| Sum of electronic and thermal Free Energies= | -988.658055                 |

|                                               | E (Thermal)<br>KCal/Mol | CV<br>Cal/Mol-Kelvin | S<br>Cal/Mol-Kelvin |
|-----------------------------------------------|-------------------------|----------------------|---------------------|
| Total                                         | 109.689                 | 45.429               | 111.357             |
| C,0,3.4670188439,1.2483947734,0.3791480003    |                         |                      |                     |
| C,0,2.1142370119,1.1384631451,0.0582689849    |                         |                      |                     |
| C,0,1.5700623429,-0.1179938551,-0.247904479   |                         |                      |                     |
| C,0,2.3856731759,-1.2569323574,-0.2320900102  |                         |                      |                     |
| C,0,3.7403444383,-1.1435834599,0.0930996492   |                         |                      |                     |
| C,0,4.281069363,0.1083869341,0.3985544054     |                         |                      |                     |
| C,0,0.1357885721,-0.2750083483,-0.5989507226  |                         |                      |                     |
| O,0,-0.5203491891,0.7674692294,-1.3122771385  |                         |                      |                     |
| N,0,-0.8500243951,0.5373659061,0.1051001475   |                         |                      |                     |
| S,0,-2.4579709854,-0.2390521761,0.2171808886  |                         |                      |                     |
| O,0,-2.5248033594,-0.6950758624,1.6132471827  |                         |                      |                     |
| O,0,-2.6844986583,-1.1931345686,-0.879939053  |                         |                      |                     |
| C,0,-3.4963611036,1.2042677704,-0.02126893    |                         |                      |                     |
| H,0,-0.1775642751,-1.2760393174,-0.9029938353 |                         |                      |                     |
| H,0,-4.5285874993,0.8585898181,0.0724694046   |                         |                      |                     |
| H,0,-3.3081496987,1.5991781111,-1.0210114643  |                         |                      |                     |
| H,0,-3.2531013235,1.931258865,0.7547438045    |                         |                      |                     |
| H,0,1.9620499981,-2.2306817113,-0.4739774075  |                         |                      |                     |
| H,0,4.3701440015,-2.0304656552,0.1050218128   |                         |                      |                     |
| H,0,5.3359390895,0.1984825064,0.6501111027    |                         |                      |                     |
| H,0,3.8887309683,2.2230662629,0.6153132533    |                         |                      |                     |
| H,0,1.4804206525,2.0216520751,0.04134625      |                         |                      |                     |

### *trans*-3-phenyl-2-methanesulfonyloxaziridine (Isomer 2)

B3LYP/6-31+G\*\*

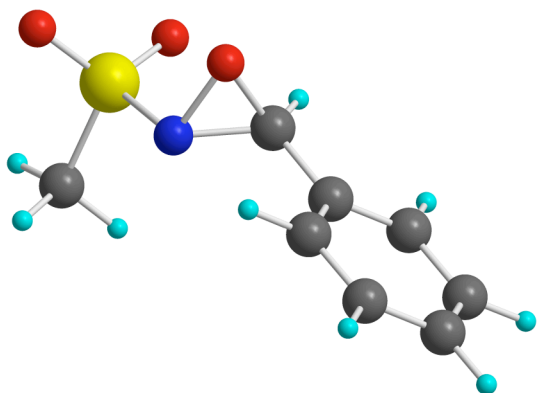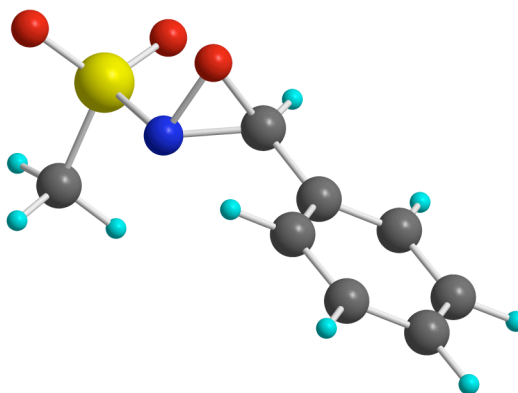

Filename: b3BBoxazsmtransisb  
 E(RB+HF-LYP) = -988.725677463

|                                              |                             |
|----------------------------------------------|-----------------------------|
| Zero-point correction=                       | 0.164417 (Hartree/Particle) |
| Thermal correction to Energy=                | 0.176491                    |
| Thermal correction to Enthalpy=              | 0.177435                    |
| Thermal correction to Gibbs Free Energy=     | 0.124741                    |
| Sum of electronic and zero-point Energies=   | -988.561261                 |
| Sum of electronic and thermal Energies=      | -988.549187                 |
| Sum of electronic and thermal Enthalpies=    | -988.548243                 |
| Sum of electronic and thermal Free Energies= | -988.600936                 |

|                                               | E (Thermal)<br>KCal/Mol | CV<br>Cal/Mol-Kelvin | S<br>Cal/Mol-Kelvin |
|-----------------------------------------------|-------------------------|----------------------|---------------------|
| Total                                         | 110.749                 | 45.054               | 110.902             |
| C,0,4.2824310038,0.0769839778,0.4037466668    |                         |                      |                     |
| C,0,3.4673666895,1.2122730183,0.455817421     |                         |                      |                     |
| C,0,2.1208309598,1.1242668432,0.1125256091    |                         |                      |                     |
| C,0,1.5819896994,-0.1061068276,-0.2861296345  |                         |                      |                     |
| C,0,2.4002464896,-1.2390673137,-0.3436468401  |                         |                      |                     |
| C,0,3.7488557105,-1.1485486611,0.003332086    |                         |                      |                     |
| C,0,0.1469978706,-0.2284650867,-0.6487030793  |                         |                      |                     |
| N,0,-0.8377217916,0.4513508517,0.1849538239   |                         |                      |                     |
| S,0,-2.4673162581,-0.3068755553,0.1412076364  |                         |                      |                     |
| O,0,-3.4135818895,0.74791343,-0.2112308411    |                         |                      |                     |
| O,0,-0.5227632194,0.8984138553,-1.1825166986  |                         |                      |                     |
| C,0,-2.5795583271,-0.6511550561,1.9065106879  |                         |                      |                     |
| O,0,-2.442098745,-1.5782321446,-0.5944302178  |                         |                      |                     |
| H,0,-0.1674193345,-1.1770359971,-1.0838463728 |                         |                      |                     |
| H,0,1.9821751254,-2.1911173652,-0.6627784605  |                         |                      |                     |
| H,0,4.3802220777,-2.0313127242,-0.0436699792  |                         |                      |                     |
| H,0,5.3330802389,0.1504421073,0.6711485668    |                         |                      |                     |
| H,0,3.8848453651,2.1673701152,0.7622422651    |                         |                      |                     |
| H,0,1.4806483233,2.0001875501,0.1416924315    |                         |                      |                     |
| H,0,-3.5641458237,-1.0947854038,2.0712375709  |                         |                      |                     |
| H,0,-1.7936736575,-1.3558965446,2.1848731321  |                         |                      |                     |
| H,0,-2.481509507,0.2877709311,2.4524862265    |                         |                      |                     |

### B3LYP/6-31+G\*\* (PCM)

E(RB+HF-LYP) = -988.777909821

|                                              |                             |
|----------------------------------------------|-----------------------------|
| Zero-point correction=                       | 0.162577 (Hartree/Particle) |
| Thermal correction to Energy=                | 0.174753                    |
| Thermal correction to Enthalpy=              | 0.175697                    |
| Thermal correction to Gibbs Free Energy=     | 0.122733                    |
| Sum of electronic and zero-point Energies=   | -988.615333                 |
| Sum of electronic and thermal Energies=      | -988.603157                 |
| Sum of electronic and thermal Enthalpies=    | -988.602213                 |
| Sum of electronic and thermal Free Energies= | -988.655177                 |



|       | E (Thermal)<br>KCal/Mol | CV<br>Cal/Mol-Kelvin | S<br>Cal/Mol-Kelvin |
|-------|-------------------------|----------------------|---------------------|
| Total | 109.659                 | 45.452               | 111.473             |

```

C,0,4.2810651976,0.0915018153,0.4082195934
C,0,3.4589537863,1.2252555046,0.4466254829
C,0,2.109201164,1.1248801619,0.1097158081
C,0,1.5763396347,-0.1166931104,-0.2701231234
C,0,2.4004701495,-1.2490008971,-0.3132872011
C,0,3.7519778161,-1.1450154439,0.0277093777
C,0,0.1448567714,-0.263967095,-0.635745559
N,0,-0.8492274417,0.4793936853,0.1334616873
S,0,-2.4873075688,-0.2536269433,0.1492331187
O,0,-3.4185825472,0.8457484872,-0.1309731432
O,0,-0.5259277764,0.8273307921,-1.2568665306
C,0,-2.5436259737,-0.679656867,1.8925297925
O,0,-2.5441061237,-1.4782626647,-0.6681299245
H,0,-0.1623760145,-1.2395802207,-1.0174233221
H,0,1.9868462213,-2.2096120127,-0.6176262518
H,0,4.388855636,-2.0262167864,-0.0083184904
H,0,5.3337622473,0.1749239226,0.67104798
H,0,3.8724557276,2.1883423103,0.7385052066
H,0,1.4691908254,2.0036424828,0.1344714854
H,0,-3.5334830234,-1.1087699487,2.0666522732
H,0,-1.7640037203,-1.4149129848,2.1008499799
H,0,-2.4054339875,0.2326698127,2.4742937606

```

### *trans*-3-phenyl-2-methanesulfonyloxaziridine (Isomer 3)

B3LYP/6-31+G\*\*

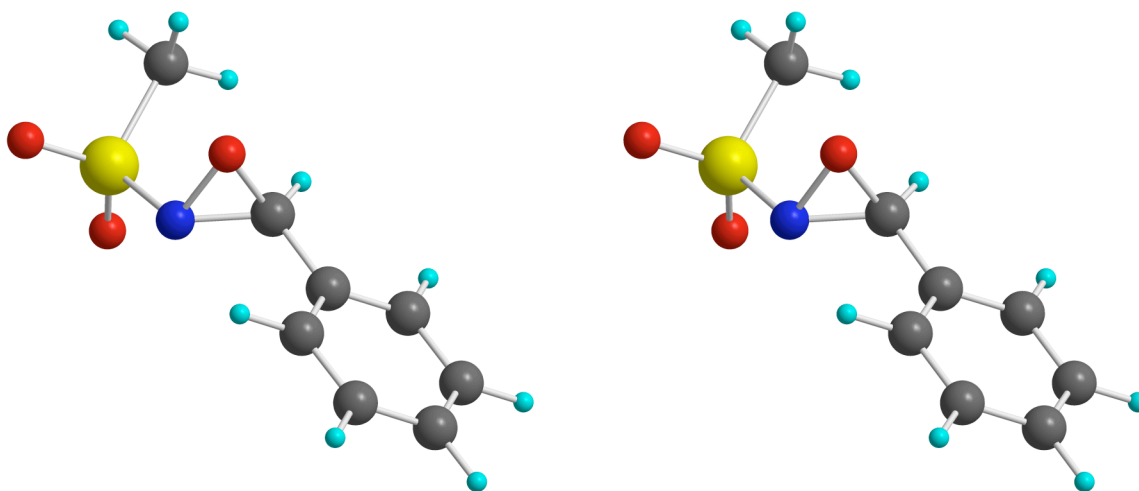

b3BBoxazsmtransisc  
E(RB+HF-LYP) = -988.760076529

|                                              |                             |
|----------------------------------------------|-----------------------------|
| Zero-point correction=                       | 0.163415 (Hartree/Particle) |
| Thermal correction to Energy=                | 0.175632                    |
| Thermal correction to Enthalpy=              | 0.176576                    |
| Thermal correction to Gibbs Free Energy=     | 0.123060                    |
| Sum of electronic and zero-point Energies=   | -988.596661                 |
| Sum of electronic and thermal Energies=      | -988.584445                 |
| Sum of electronic and thermal Enthalpies=    | -988.583501                 |
| Sum of electronic and thermal Free Energies= | -988.637017                 |

E (Thermal)

CV

S

|                                               | KCal/Mol | Cal/Mol-Kelvin | Cal/Mol-Kelvin |
|-----------------------------------------------|----------|----------------|----------------|
| Total                                         | 110.211  | 45.425         | 112.635        |
| C,0,4.3111090541,0.1933617643,0.4000429459    |          |                |                |
| C,0,3.4615220277,1.2990403625,0.2748096521    |          |                |                |
| C,0,2.1132922435,1.1171382753,-0.027629583    |          |                |                |
| C,0,1.6091625568,-0.1785385888,-0.2092782031  |          |                |                |
| C,0,2.4598631297,-1.2832199608,-0.0853455708  |          |                |                |
| C,0,3.8102465955,-1.0978538304,0.2206432271   |          |                |                |
| C,0,0.1765782729,-0.3995680751,-0.5350428586  |          |                |                |
| N,0,-0.8140757588,0.4796912174,0.0421564322   |          |                |                |
| S,0,-2.4398807421,-0.2184429687,0.3248256987  |          |                |                |
| O,0,-3.3336980723,0.932896568,0.4136300574    |          |                |                |
| O,0,-0.4862716774,0.5260696535,-1.3953083489  |          |                |                |
| O,0,-2.2593747105,-1.1411518789,1.4503467273  |          |                |                |
| C,0,-2.885799699,-1.1504519737,-1.1617325618  |          |                |                |
| H,0,-0.1035124751,-1.4410665581,-0.6975903882 |          |                |                |
| H,0,2.0679419062,-2.2877555526,-0.2248631445  |          |                |                |
| H,0,4.4661672204,-1.9575978451,0.3175488981   |          |                |                |
| H,0,5.3607500938,0.3399873564,0.6372386171    |          |                |                |
| H,0,3.8515748828,2.3025276316,0.4157907283    |          |                |                |
| H,0,1.4466720105,1.9677896594,-0.123295055    |          |                |                |
| H,0,-3.9045948979,-1.4921177196,-0.9678361073 |          |                |                |
| H,0,-2.8570075188,-0.4826103147,-2.0213771496 |          |                |                |
| H,0,-2.2216144419,-2.0050512219,-1.2884810134 |          |                |                |

### B3LYP/6-31+G\*\* (PCM)

E(RB+HF-LYP) = -988.774902412

|                                              |                             |
|----------------------------------------------|-----------------------------|
| Zero-point correction=                       | 0.162505 (Hartree/Particle) |
| Thermal correction to Energy=                | 0.174746                    |
| Thermal correction to Enthalpy=              | 0.175690                    |
| Thermal correction to Gibbs Free Energy=     | 0.122271                    |
| Sum of electronic and zero-point Energies=   | -988.612398                 |
| Sum of electronic and thermal Energies=      | -988.600157                 |
| Sum of electronic and thermal Enthalpies=    | -988.599213                 |
| Sum of electronic and thermal Free Energies= | -988.652631                 |

|       | E (Thermal) | CV             | S              |
|-------|-------------|----------------|----------------|
|       | KCal/Mol    | Cal/Mol-Kelvin | Cal/Mol-Kelvin |
| Total | 109.655     | 45.554         | 112.428        |

|                                               |
|-----------------------------------------------|
| C,0,4.3081073035,0.1722423074,0.4046050381    |
| C,0,3.463057866,1.2876917165,0.3384896821     |
| C,0,2.1134988206,1.1278889763,0.0254981185    |
| C,0,1.6049209512,-0.1553555737,-0.2262107656  |
| C,0,2.45099257,-1.2702034523,-0.1631738811    |
| C,0,3.8022136123,-1.1062401756,0.1541564087   |
| C,0,0.1744289989,-0.3621367669,-0.5662608537  |
| N,0,-0.8204343669,0.4858281774,0.0623582759   |
| S,0,-2.4574510347,-0.1748056949,0.2944475009  |
| O,0,-3.3374743026,0.9968143734,0.2341272691   |
| O,0,-0.494993748,0.6168190136,-1.3661578482   |
| O,0,-2.3577511932,-0.9671149443,1.5283126387  |
| C,0,-2.8515094427,-1.2443965985,-1.1036526391 |
| H,0,-0.1015147697,-1.3922515263,-0.7970005156 |
| H,0,2.054616995,-2.2652546615,-0.3613395156   |
| H,0,4.456067095,-1.9742281583,0.2035529401    |
| H,0,5.3602334419,0.3020158516,0.6504013623    |
| H,0,3.8577585341,2.282661336,0.5330653734     |
| H,0,1.4554536307,1.9918786266,-0.0257336804   |
| H,0,-3.9003362903,-1.5136439115,-0.9551733976 |

H,0,-2.7253232805,-0.6782449089,-2.0268760847  
H,0,-2.2255113905,-2.1368880063,-1.0781824261

## cis-3-phenyl-2-methanesulfonyloxaziridine (Isomer 1)

### B3LYP/6-31+G\*\*

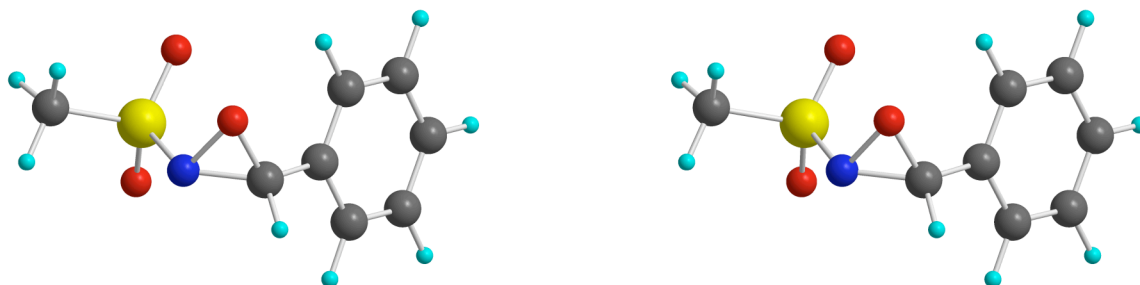

b3BBoxazsmcisisb

E(RB+HF-LYP) = -988.757855848

|                                              |                             |
|----------------------------------------------|-----------------------------|
| Zero-point correction=                       | 0.163511 (Hartree/Particle) |
| Thermal correction to Energy=                | 0.175586                    |
| Thermal correction to Enthalpy=              | 0.176530                    |
| Thermal correction to Gibbs Free Energy=     | 0.123944                    |
| Sum of electronic and zero-point Energies=   | -988.594345                 |
| Sum of electronic and thermal Energies=      | -988.582270                 |
| Sum of electronic and thermal Enthalpies=    | -988.581325                 |
| Sum of electronic and thermal Free Energies= | -988.633912                 |

|                        | E (Thermal) | CV                          | S              |
|------------------------|-------------|-----------------------------|----------------|
|                        | KCal/Mol    | Cal/Mol-Kelvin              | Cal/Mol-Kelvin |
| Total                  | 110.182     | 45.355                      | 110.678        |
| Zero-point correction= |             | 0.162637 (Hartree/Particle) |                |

C,0,3.1126753765,-3.9781463527,-1.5889125085  
C,0,3.296047926,-3.4912121895,-0.288851802  
C,0,4.4640627652,-3.8114650362,0.4178474206  
C,0,5.42865286,-4.6379198254,-0.1581285574  
C,0,5.2408892734,-5.1292974344,-1.4533703404  
C,0,4.0865436285,-4.7942978783,-2.1663037468  
C,0,2.3218903725,-2.5617165352,0.3574077992  
O,0,1.1556094052,-2.1662331844,-0.3341088143  
N,0,1.0271749581,-2.8999911529,0.939475798  
S,0,0.4011779689,-4.5622371023,0.7161573176  
O,0,1.0985673997,-5.3506776962,1.7374389906  
O,0,0.3595007136,-4.9811251027,-0.6868752879  
C,0,-1.2808985569,-4.2337313755,1.2657306326  
H,0,2.7908728118,-1.7619248317,0.9348202234  
H,0,4.6143967868,-3.4210735301,1.4213093761  
H,0,6.3250859709,-4.8924645145,0.3991447582  
H,0,5.9936910982,-5.7679726008,-1.9062102424  
H,0,3.940219982,-5.1717042017,-3.1738461473  
H,0,2.2091148753,-3.7283845301,-2.1318450801  
H,0,-1.802899678,-5.1918856953,1.2290761348  
H,0,-1.2443553177,-3.8439416788,2.2825795883  
H,0,-1.7355026202,-3.5198845511,0.5776574877

### B3LYP/6-31G\*

E(RB+HF-LYP) = -988.720366144

E (Cosmo, CHCl3) E(RB+HF-LYP) = -988.664369180

Zero-point correction= 0.164421 (Hartree/Particle)  
 Thermal correction to Energy= 0.176420  
 Thermal correction to Enthalpy= 0.177364  
 Thermal correction to Gibbs Free Energy= 0.125017  
 Sum of electronic and zero-point Energies= -988.555945  
 Sum of electronic and thermal Energies= -988.543947  
 Sum of electronic and thermal Enthalpies= -988.543002  
 Sum of electronic and thermal Free Energies= -988.595349

|       | E (Thermal) | CV             | S              |
|-------|-------------|----------------|----------------|
|       | KCAL/MOL    | CAL/MOL-KELVIN | CAL/MOL-KELVIN |
| TOTAL | 110.705     | 45.075         | 110.174        |

Standard orientation:

| Center<br>Number | Atomic<br>Number | Atomic<br>Type | Coordinates (Angstroms) |           |           |
|------------------|------------------|----------------|-------------------------|-----------|-----------|
|                  |                  |                | X                       | Y         | Z         |
| 1                | 6                | 0              | -0.005453               | 1.598521  | 0.074951  |
| 2                | 8                | 0              | 0.854266                | 1.709867  | -1.036889 |
| 3                | 7                | 0              | 1.385703                | 1.195069  | 0.241559  |
| 4                | 16               | 0              | 1.760858                | -0.549835 | 0.163692  |
| 5                | 8                | 0              | 1.294768                | -1.185163 | -1.068917 |
| 6                | 8                | 0              | 1.398083                | -1.059694 | 1.487628  |
| 7                | 6                | 0              | 3.549660                | -0.370880 | 0.063874  |
| 8                | 6                | 0              | -1.200535               | 0.705665  | 0.012377  |
| 9                | 6                | 0              | -2.037659               | 0.643227  | 1.133826  |
| 10               | 6                | 0              | -3.190123               | -0.139158 | 1.104907  |
| 11               | 6                | 0              | -3.521899               | -0.846660 | -0.052626 |
| 12               | 6                | 0              | -2.697431               | -0.771596 | -1.176834 |
| 13               | 6                | 0              | -1.537144               | 0.000924  | -1.148694 |
| 14               | 1                | 0              | -0.183936               | 2.541763  | 0.597074  |
| 15               | 1                | 0              | 3.898621                | 0.181613  | 0.936694  |
| 16               | 1                | 0              | 3.796110                | 0.153448  | -0.861063 |
| 17               | 1                | 0              | 3.961988                | -1.382466 | 0.052094  |
| 18               | 1                | 0              | -1.783081               | 1.203005  | 2.030877  |
| 19               | 1                | 0              | -3.829951               | -0.192100 | 1.981187  |
| 20               | 1                | 0              | -4.423725               | -1.452336 | -0.078989 |
| 21               | 1                | 0              | -2.956363               | -1.317352 | -2.079713 |
| 22               | 1                | 0              | -0.886752               | 0.055966  | -2.013405 |

### B3LYP/6-31+G\*\* (PCM)

E(RB+HF-LYP) = -988.770552935

Zero-point correction= 0.162637 (Hartree/Particle)  
 Thermal correction to Energy= 0.174717  
 Thermal correction to Enthalpy= 0.175661  
 Thermal correction to Gibbs Free Energy= 0.123112  
 Sum of electronic and zero-point Energies= -988.607916  
 Sum of electronic and thermal Energies= -988.595836  
 Sum of electronic and thermal Enthalpies= -988.594892  
 Sum of electronic and thermal Free Energies= -988.647441

|       | E (Thermal) | CV             | S              |
|-------|-------------|----------------|----------------|
|       | KCal/Mol    | Cal/Mol-Kelvin | Cal/Mol-Kelvin |
| Total | 109.636     | 45.442         | 110.599        |

C,0,3.133906729,-3.9432699102,-1.6244419285  
 C,0,3.2887122086,-3.493334842,-0.3070744507  
 C,0,4.4337391732,-3.8455956244,0.4229763175  
 C,0,5.4019901151,-4.6722614956,-0.1491962995  
 C,0,5.2430096264,-5.1281606139,-1.4623803777

```

C,0,4.1132119377,-4.7571107767,-2.1984877476
C,0,2.3151790485,-2.5580141944,0.3309252195
O,0,1.1285778335,-2.1985278845,-0.3534221651
N,0,1.0306569946,-2.8991402718,0.9401673099
S,0,0.4088798847,-4.5626819013,0.770899514
O,0,1.1033554001,-5.3111872481,1.8297030056
O,0,0.4046046848,-5.0508821142,-0.6130296871
C,0,-1.2819609444,-4.2327280111,1.278126963
H,0,2.7789341147,-1.7344215976,0.8822967122
H,0,4.564781253,-3.4770764314,1.439570642
H,0,6.2820044494,-4.9525707681,0.4256509324
H,0,6.0011829519,-5.7657677164,-1.9126541102
H,0,3.9910602131,-5.1035060712,-3.222574495
H,0,2.2519069198,-3.6612959138,-2.1910281354
H,0,-1.7974319717,-5.1959309414,1.2611961365
H,0,-1.2659196787,-3.8111122913,2.2835200857
H,0,-1.7278629435,-3.5427103808,0.5594495586

```

### *cis-3-phenyl-2-methanesulfonyloxaziridine (Isomer 2)*

**B3LYP/6-31+G\*\***

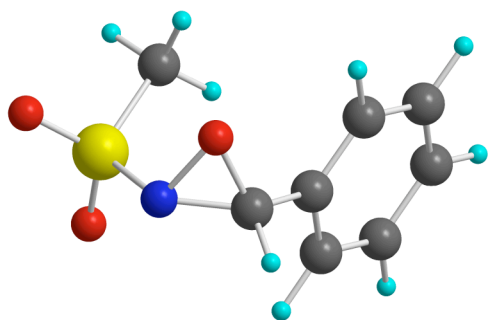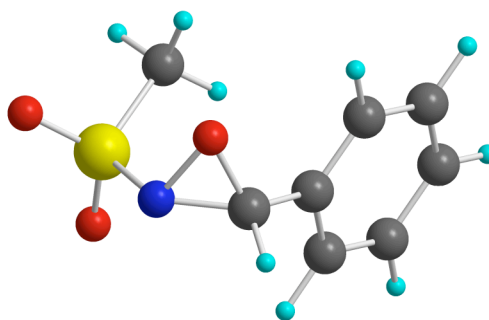

b3BBoxazsmcisisc  
E(RB+HF-LYP) = -988.751621168

```

Zero-point correction= 0.163578 (Hartree/Particle)
Thermal correction to Energy= 0.175633
Thermal correction to Enthalpy= 0.176577
Thermal correction to Gibbs Free Energy= 0.124400
Sum of electronic and zero-point Energies= -988.588043
Sum of electronic and thermal Energies= -988.575988
Sum of electronic and thermal Enthalpies= -988.575044
Sum of electronic and thermal Free Energies= -988.627221

```

|       | E (Thermal)<br>KCal/Mol | CV<br>Cal/Mol-Kelvin | S<br>Cal/Mol-Kelvin |
|-------|-------------------------|----------------------|---------------------|
| Total | 110.211                 | 45.351               | 109.816             |

```

C,0,3.553787426,-3.667132354,-1.6399833367
C,0,3.4962012157,-3.0963821004,-0.3619372037
C,0,4.131543115,-3.7291058514,0.7153349166
C,0,4.7984252581,-4.9395200665,0.515867979
C,0,4.8491963646,-5.5131156361,-0.7585149224
C,0,4.2292269282,-4.8741660309,-1.8361128825
C,0,2.8513973008,-1.7587958553,-0.1745064827
O,0,1.7328395056,-1.4129405474,-0.9779647733
N,0,1.6010149548,-1.4752431255,0.4929296447
S,0,0.5051317245,-2.7585916851,1.0686429003
C,0,0.4195997534,-4.1035945776,-0.1370166964
O,0,-0.8035494231,-2.1103677463,1.0810448495
O,0,1.1410756429,-3.2255864439,2.3047709561
H,0,3.5548552824,-0.9350329857,-0.0283840473
H,0,4.0829405747,-3.2907701398,1.7074407883

```

H,0,5.2756652966,-5.4345028916,1.3561180717  
H,0,5.3714960379,-6.4529429755,-0.9108488299  
H,0,4.2707943853,-5.3135696399,-2.8283025922  
H,0,3.0680846873,-3.1690048188,-2.4736884998  
H,0,-0.4417877757,-4.693540784,0.1837757317  
H,0,0.2432410413,-3.6758340637,-1.1237529746  
H,0,1.3355297037,-4.6889766805,-0.1041185963

## B3LYP/6-31+G\*\* (PCM)

E(RB+HF-LYP) = -988.766629937

|                                              |                             |
|----------------------------------------------|-----------------------------|
| Zero-point correction=                       | 0.162703 (Hartree/Particle) |
| Thermal correction to Energy=                | 0.174731                    |
| Thermal correction to Enthalpy=              | 0.175676                    |
| Thermal correction to Gibbs Free Energy=     | 0.123527                    |
| Sum of electronic and zero-point Energies=   | -988.603927                 |
| Sum of electronic and thermal Energies=      | -988.591899                 |
| Sum of electronic and thermal Enthalpies=    | -988.590954                 |
| Sum of electronic and thermal Free Energies= | -988.643103                 |

|       | E (Thermal)<br>KCal/Mol | CV<br>Cal/Mol-Kelvin | S<br>Cal/Mol-Kelvin |
|-------|-------------------------|----------------------|---------------------|
| Total | 109.646                 | 45.414               | 109.756             |

C,0,3.5070346922,-3.6692398876,-1.6220677144  
C,0,3.5047533836,-3.0917208697,-0.3455254746  
C,0,4.1843454733,-3.7165412525,0.7102130077  
C,0,4.8355655234,-4.9330084637,0.4933717652  
C,0,4.8291803231,-5.5164187457,-0.7786978385  
C,0,4.1695409193,-4.8813247969,-1.8357102605  
C,0,2.8751819874,-1.7539934278,-0.1280478857  
O,0,1.7705317107,-1.3683411087,-0.9383072378  
N,0,1.6068092915,-1.4815372019,0.5227010133  
S,0,0.4667325117,-2.746203701,1.0164193806  
C,0,0.4577710986,-4.1379820587,-0.1310256867  
O,0,-0.836273199,-2.0813284345,0.9064306452  
O,0,0.9747484272,-3.1664753904,2.3296709559  
H,0,3.5798941264,-0.9392332684,0.0686523565  
H,0,4.1942556159,-3.261309104,1.6990714926  
H,0,5.3491689863,-5.4233920992,1.3175267728  
H,0,5.3412125177,-6.4618296609,-0.9458273086  
H,0,4.1695753003,-5.3279771987,-2.8277546029  
H,0,2.9927171365,-3.1736480811,-2.4427985986  
H,0,-0.4202314542,-4.7199679208,0.1619847062  
H,0,0.3413805064,-3.7531370497,-1.1445956956  
H,0,1.3728141217,-4.7141072781,-0.0148897922

## 2-methyl-2-butene

### B3LYP/6-31+G\*\*

b3BBgassml

E(RB+HF-LYP) = -196.564442449

|                                            |                             |
|--------------------------------------------|-----------------------------|
| Zero-point correction=                     | 0.135787 (Hartree/Particle) |
| Thermal correction to Energy=              | 0.142700                    |
| Thermal correction to Enthalpy=            | 0.143644                    |
| Thermal correction to Gibbs Free Energy=   | 0.105915                    |
| Sum of electronic and zero-point Energies= | -196.428655                 |
| Sum of electronic and thermal Energies=    | -196.421743                 |
| Sum of electronic and thermal Enthalpies=  | -196.420798                 |

Sum of electronic and thermal Free Energies= -196.458528

|       | E (Thermal)<br>KCal/Mol | CV<br>Cal/Mol-Kelvin | S<br>Cal/Mol-Kelvin |
|-------|-------------------------|----------------------|---------------------|
| Total | 89.545                  | 23.867               | 79.408              |

C,0,1.281173637,0.0498317609,-0.9134809796  
C,0,0.0906984563,0.1704043374,-0.0019835532  
C,0,0.0373073543,0.016731378,1.3325516874  
C,0,-1.2670696654,0.1805374912,2.0785472407  
C,0,1.2183796602,-0.3226361701,2.210294032  
H,0,1.0358362145,-1.2569079589,2.7581246555  
H,0,2.151257366,-0.437980225,1.655190508  
H,0,1.3723723812,0.4571417807,2.9681831662  
H,0,-1.193454096,0.9772319833,2.8313496747  
H,0,-2.0940151587,0.4251311512,1.4053925413  
H,0,-1.5295315415,-0.7379256536,2.6210750781  
H,0,1.1147216205,-0.7271747466,-1.6711257403  
H,0,1.4495372609,0.9870102794,-1.4602202041  
H,0,2.2055576881,-0.1956460031,-0.3852302755  
H,0,-0.8439721773,0.4154725952,-0.5088228313

### mPW1K/6-31+G\*\*

mpBBgassml

E(RmPW+HF-PW91) = -196.512416150

|                                              |                             |
|----------------------------------------------|-----------------------------|
| Zero-point correction=                       | 0.139640 (Hartree/Particle) |
| Thermal correction to Energy=                | 0.146473                    |
| Thermal correction to Enthalpy=              | 0.147417                    |
| Thermal correction to Gibbs Free Energy=     | 0.109820                    |
| Sum of electronic and zero-point Energies=   | -196.372776                 |
| Sum of electronic and thermal Energies=      | -196.365943                 |
| Sum of electronic and thermal Enthalpies=    | -196.364999                 |
| Sum of electronic and thermal Free Energies= | -196.402596                 |

|       | E (Thermal)<br>KCal/Mol | CV<br>Cal/Mol-Kelvin | S<br>Cal/Mol-Kelvin |
|-------|-------------------------|----------------------|---------------------|
| Total | 91.913                  | 23.387               | 79.130              |

C,0,1.2739378348,0.0489152973,-0.8960023934  
C,0,0.0908762048,0.1697380582,0.0047481617  
C,0,0.0394597382,0.0168869741,1.3286479859  
C,0,-1.2529961737,0.1787839109,2.0700670237  
C,0,1.2108743156,-0.3194941659,2.1980443902  
H,0,1.0277837237,-1.2481200646,2.7408164902  
H,0,2.1379847299,-0.4334222071,1.6459707701  
H,0,1.3618914083,0.4563863177,2.9501588974  
H,0,-1.1772430272,0.9703081182,2.8175569491  
H,0,-2.0753429386,0.4220623436,1.401743689  
H,0,-1.5112390567,-0.7351056735,2.6077486675  
H,0,1.1090490277,-0.7241045001,-1.6474595484  
H,0,1.4427464399,0.9802791316,-1.4377613475  
H,0,2.1902881135,-0.1955563226,-0.3671167478  
H,0,-0.8392723403,0.4136637821,-0.4973169877

### B3LYP/6-31G\*

E(RB+HF-LYP) = -196.543583745

|                                 |                             |
|---------------------------------|-----------------------------|
| Zero-point correction=          | 0.134493 (Hartree/Particle) |
| Thermal correction to Energy=   | 0.142040                    |
| Thermal correction to Enthalpy= | 0.142984                    |

Thermal correction to Gibbs Free Energy= 0.103815  
 Sum of electronic and zero-point Energies= -196.409091  
 Sum of electronic and thermal Energies= -196.401544  
 Sum of electronic and thermal Enthalpies= -196.400600  
 Sum of electronic and thermal Free Energies= -196.439769

|       | E (Thermal)<br>KCAL/MOL | CV<br>CAL/MOL-KELVIN | S<br>CAL/MOL-KELVIN |
|-------|-------------------------|----------------------|---------------------|
| TOTAL | 89.131                  | 25.076               | 82.438              |

Standard orientation:

| Center<br>Number | Atomic<br>Number |   | Coordinates (Angstroms) |           |           |
|------------------|------------------|---|-------------------------|-----------|-----------|
|                  |                  |   | X                       | Y         | Z         |
| 1                | 6                | C | 0.734302                | -0.671522 | -0.000002 |
| 2                | 6                | C | -0.449608               | -0.040352 | -0.000003 |
| 3                | 6                | C | -0.629993               | 1.458176  | 0.000000  |
| 4                | 6                | C | 2.115263                | -0.077846 | 0.000000  |
| 5                | 1                | H | 0.714160                | -1.762813 | 0.000002  |
| 6                | 6                | C | -1.741324               | -0.824199 | 0.000000  |
| 7                | 1                | H | -1.205424               | 1.779740  | -0.879540 |
| 8                | 1                | H | -1.205280               | 1.779752  | 0.879630  |
| 9                | 1                | H | 0.313768                | 2.008357  | -0.000083 |
| 10               | 1                | H | -1.563937               | -1.904444 | 0.000030  |
| 11               | 1                | H | -2.353788               | -0.580559 | -0.879961 |
| 12               | 1                | H | -2.353810               | -0.580515 | 0.879935  |
| 13               | 1                | H | 2.683510                | -0.410228 | 0.879861  |
| 14               | 1                | H | 2.115417                | 1.015466  | -0.000043 |
| 15               | 1                | H | 2.683543                | -0.410297 | -0.879813 |

### MPW1K/6-31+G\*

E(RmPW+HF-PW91) = -196.495886934

Zero-point correction= 0.140385 (Hartree/Particle)  
 Thermal correction to Energy= 0.147199  
 Thermal correction to Enthalpy= 0.148143  
 Thermal correction to Gibbs Free Energy= 0.110576  
 Sum of electronic and zero-point Energies= -196.355502  
 Sum of electronic and thermal Energies= -196.348688  
 Sum of electronic and thermal Enthalpies= -196.347744  
 Sum of electronic and thermal Free Energies= -196.385311

|       | E (Thermal)<br>KCAL/MOL | CV<br>CAL/MOL-KELVIN | S<br>CAL/MOL-KELVIN |
|-------|-------------------------|----------------------|---------------------|
| TOTAL | 92.369                  | 23.258               | 79.065              |

C,0,-0.1975509345,-0.063112104,0.9684390342  
 C,0,-0.2583931984,0.088259349,-0.3551860693  
 C,0,0.990100254,-0.3859539872,1.8121255407  
 C,0,0.9052063516,-0.0422347963,-1.2882819494  
 C,0,-1.5559123039,0.4147690668,-1.030693869  
 H,0,-1.1234812885,0.0612645302,1.5206744534  
 H,0,1.1616519299,0.3966579254,2.5533070775  
 H,0,1.9051781321,-0.5016277588,1.2376939211  
 H,0,0.828919794,-1.3116853774,2.3675034211  
 H,0,0.7158031292,-0.8220784746,-2.0287783277  
 H,0,1.8372447184,-0.2812906448,-0.7851295655  
 H,0,1.0544164026,0.885280612,-1.8449035842  
 H,0,-1.4846927402,1.3552018262,-1.581441681  
 H,0,-2.3736690512,0.502006813,-0.3180603027  
 H,0,-1.8220720391,-0.3540946208,-1.7592815352



## MP2/6-31G\*

EUMP2= -0.19579496015743D+03

Zero-point correction= 0.139534 (Hartree/Particle)  
Thermal correction to Energy= 0.146471  
Thermal correction to Enthalpy= 0.147415  
Thermal correction to Gibbs Free Energy= 0.109447  
Sum of electronic and zero-point Energies= -195.655426  
Sum of electronic and thermal Energies= -195.648489  
Sum of electronic and thermal Enthalpies= -195.647545  
Sum of electronic and thermal Free Energies= -195.685514

|       | E (Thermal)<br>KCAL/MOL | CV<br>CAL/MOL-KELVIN | S<br>CAL/MOL-KELVIN |
|-------|-------------------------|----------------------|---------------------|
| TOTAL | 91.912                  | 23.473               | 79.911              |

Standard orientation:

| Center<br>Number | Atomic<br>Number | Atomic<br>Type | Coordinates (Angstroms) |           |           |
|------------------|------------------|----------------|-------------------------|-----------|-----------|
|                  |                  |                | X                       | Y         | Z         |
| 1                | 6                | 0              | 0.735969                | -0.675499 | 0.000000  |
| 2                | 6                | 0              | 0.000000                | 0.451358  | 0.000000  |
| 3                | 6                | 0              | -1.503765               | 0.504132  | 0.000000  |
| 4                | 6                | 0              | 0.257823                | -2.097251 | 0.000000  |
| 5                | 1                | 0              | 1.820710                | -0.559766 | 0.000000  |
| 6                | 6                | 0              | 0.667195                | 1.801440  | 0.000000  |
| 7                | 1                | 0              | -1.865236               | 1.049177  | 0.879975  |
| 8                | 1                | 0              | -1.865236               | 1.049177  | -0.879975 |
| 9                | 1                | 0              | -1.969367               | -0.482220 | 0.000000  |
| 10               | 1                | 0              | 1.756846                | 1.711502  | 0.000000  |
| 11               | 1                | 0              | 0.371085                | 2.384230  | 0.880498  |
| 12               | 1                | 0              | 0.371085                | 2.384230  | -0.880498 |
| 13               | 1                | 0              | 0.633501                | -2.631229 | -0.880021 |
| 14               | 1                | 0              | -0.830215               | -2.178949 | 0.000000  |
| 15               | 1                | 0              | 0.633501                | -2.631229 | 0.880021  |

## HF/6-31G\*

E(RHF) = -195.145768089

Zero-point correction= 0.145805 (Hartree/Particle)  
Thermal correction to Energy= 0.152444  
Thermal correction to Enthalpy= 0.153388  
Thermal correction to Gibbs Free Energy= 0.116105  
Sum of electronic and zero-point Energies= -194.999963  
Sum of electronic and thermal Energies= -194.993324  
Sum of electronic and thermal Enthalpies= -194.992380  
Sum of electronic and thermal Free Energies= -195.029663

|       | E (Thermal)<br>KCAL/MOL | CV<br>CAL/MOL-KELVIN | S<br>CAL/MOL-KELVIN |
|-------|-------------------------|----------------------|---------------------|
| TOTAL | 95.660                  | 22.361               | 78.469              |

Standard orientation:

| Center<br>Number | Atomic<br>Number | Atomic<br>Type | Coordinates (Angstroms) |           |          |
|------------------|------------------|----------------|-------------------------|-----------|----------|
|                  |                  |                | X                       | Y         | Z        |
| 1                | 6                | 0              | 0.731264                | -0.661217 | 0.000000 |

|    |   |   |           |           |           |
|----|---|---|-----------|-----------|-----------|
| 2  | 6 | 0 | 0.000000  | 0.443471  | 0.000000  |
| 3  | 6 | 0 | -1.508819 | 0.493200  | 0.000000  |
| 4  | 6 | 0 | 0.277045  | -2.095671 | 0.000000  |
| 5  | 1 | 0 | 1.804077  | -0.542333 | 0.000000  |
| 6  | 6 | 0 | 0.655555  | 1.804655  | 0.000000  |
| 7  | 1 | 0 | -1.868830 | 1.032923  | 0.872944  |
| 8  | 1 | 0 | -1.868830 | 1.032923  | -0.872944 |
| 9  | 1 | 0 | -1.971745 | -0.483407 | 0.000000  |
| 10 | 1 | 0 | 1.736766  | 1.732621  | 0.000000  |
| 11 | 1 | 0 | 0.355358  | 2.379606  | 0.873344  |
| 12 | 1 | 0 | 0.355358  | 2.379606  | -0.873344 |
| 13 | 1 | 0 | 0.663267  | -2.616267 | -0.873015 |
| 14 | 1 | 0 | -0.798959 | -2.206026 | 0.000000  |
| 15 | 1 | 0 | 0.663267  | -2.616267 | 0.873015  |

### BP86/6-31G\*

E(RB-P86) = -196.527990360

|                                              |                             |
|----------------------------------------------|-----------------------------|
| Zero-point correction=                       | 0.132898 (Hartree/Particle) |
| Thermal correction to Energy=                | 0.139864                    |
| Thermal correction to Enthalpy=              | 0.140808                    |
| Thermal correction to Gibbs Free Energy=     | 0.103077                    |
| Sum of electronic and zero-point Energies=   | -196.395093                 |
| Sum of electronic and thermal Energies=      | -196.388127                 |
| Sum of electronic and thermal Enthalpies=    | -196.387183                 |
| Sum of electronic and thermal Free Energies= | -196.424913                 |

|       |             |                |                |
|-------|-------------|----------------|----------------|
|       | E (Thermal) | CV             | S              |
|       | KCAL/MOL    | CAL/MOL-KELVIN | CAL/MOL-KELVIN |
| TOTAL | 87.766      | 24.292         | 79.411         |

Standard orientation:

| Center Number | Atomic Number | Atomic Type | Coordinates (Angstroms) |           |           |
|---------------|---------------|-------------|-------------------------|-----------|-----------|
|               |               |             | X                       | Y         | Z         |
| 1             | 6             | 0           | 0.738333                | -0.677805 | 0.000000  |
| 2             | 6             | 0           | 0.000000                | 0.455544  | 0.000000  |
| 3             | 6             | 0           | -1.511844               | 0.500590  | 0.000000  |
| 4             | 6             | 0           | 0.263242                | -2.106635 | 0.000000  |
| 5             | 1             | 0           | 1.832943                | -0.559002 | 0.000000  |
| 6             | 6             | 0           | 0.669639                | 1.813413  | 0.000000  |
| 7             | 1             | 0           | -1.888381               | 1.049400  | 0.886033  |
| 8             | 1             | 0           | -1.888381               | 1.049400  | -0.886033 |
| 9             | 1             | 0           | -1.979308               | -0.497034 | 0.000000  |
| 10            | 1             | 0           | 1.770195                | 1.730648  | 0.000000  |
| 11            | 1             | 0           | 0.371532                | 2.408712  | 0.886308  |
| 12            | 1             | 0           | 0.371532                | 2.408712  | -0.886308 |
| 13            | 1             | 0           | 0.644545                | -2.651176 | -0.886236 |
| 14            | 1             | 0           | -0.835440               | -2.199119 | 0.000000  |
| 15            | 1             | 0           | 0.644545                | -2.651176 | 0.886236  |

### B3LYP/6-311+G\*\*

E(RB+HF-LYP) = -196.600890884

|                                 |                             |
|---------------------------------|-----------------------------|
| Zero-point correction=          | 0.135233 (Hartree/Particle) |
| Thermal correction to Energy=   | 0.142170                    |
| Thermal correction to Enthalpy= | 0.143115                    |

Thermal correction to Gibbs Free Energy= 0.105324  
 Sum of electronic and zero-point Energies= -196.465658  
 Sum of electronic and thermal Energies= -196.458720  
 Sum of electronic and thermal Enthalpies= -196.457776  
 Sum of electronic and thermal Free Energies= -196.495567

|       | E (Thermal)<br>KCAL/MOL | CV<br>CAL/MOL-KELVIN | S<br>CAL/MOL-KELVIN |
|-------|-------------------------|----------------------|---------------------|
| TOTAL | 89.213                  | 23.924               | 79.538              |

Standard orientation:

| Center<br>Number | Atomic<br>Number | Atomic<br>Type |   | Coordinates (Angstroms) |           |           |
|------------------|------------------|----------------|---|-------------------------|-----------|-----------|
|                  |                  |                |   | X                       | Y         | Z         |
| 1                | 6                | 0              | C | 0.737583                | -0.667280 | 0.000000  |
| 2                | 6                | 0              | C | 0.000000                | 0.450525  | 0.000000  |
| 3                | 6                | 0              | C | -1.507532               | 0.488390  | 0.000000  |
| 4                | 6                | 0              | C | 0.272348                | -2.095574 | 0.000000  |
| 5                | 1                | 0              | H | 1.819896                | -0.544698 | 0.000000  |
| 6                | 6                | 0              | C | 0.656109                | 1.810013  | 0.000000  |
| 7                | 1                | 0              | H | -1.877811               | 1.030376  | 0.878305  |
| 8                | 1                | 0              | H | -1.877811               | 1.030376  | -0.878305 |
| 9                | 1                | 0              | H | -1.965186               | -0.500421 | 0.000000  |
| 10               | 1                | 0              | H | 1.745402                | 1.735025  | 0.000000  |
| 11               | 1                | 0              | H | 0.354133                | 2.392335  | 0.878856  |
| 12               | 1                | 0              | H | 0.354133                | 2.392335  | -0.878856 |
| 13               | 1                | 0              | H | 0.654969                | -2.628501 | -0.878106 |
| 14               | 1                | 0              | H | -0.813739               | -2.194774 | 0.000000  |
| 15               | 1                | 0              | H | 0.654969                | -2.628501 | 0.878106  |

## B3LYP/6-31+G\*\* (PCM)

b3BBpcmsml

E(RB+HF-LYP) = -196.565413359

Zero-point correction= 0.135524 (Hartree/Particle)  
 Thermal correction to Energy= 0.142437  
 Thermal correction to Enthalpy= 0.143381  
 Thermal correction to Gibbs Free Energy= 0.105656  
 Sum of electronic and zero-point Energies= -196.429889  
 Sum of electronic and thermal Energies= -196.422976  
 Sum of electronic and thermal Enthalpies= -196.422032  
 Sum of electronic and thermal Free Energies= -196.459758

|       | E (Thermal)<br>KCal/Mol | CV<br>Cal/Mol-Kelvin | S<br>Cal/Mol-Kelvin |
|-------|-------------------------|----------------------|---------------------|
| Total | 89.381                  | 23.896               | 79.400              |

C,0,1.281864642,0.0496491806,-0.9140792386  
 C,0,0.0902577949,0.1707152675,-0.0031265418  
 C,0,0.0372370738,0.0167487062,1.3323929634  
 C,0,-1.2671473053,0.180419384,2.0793085333  
 C,0,1.2182376559,-0.3225553854,2.2106855238  
 H,0,1.0347765864,-1.2566080371,2.7588129871  
 H,0,2.1517704635,-0.437719254,1.6563701709  
 H,0,1.3709489953,0.4572369069,2.9690703298  
 H,0,-1.1926650207,0.9765230788,2.8328287942  
 H,0,-2.0946384272,0.425126832,1.4064358393

H,0,-1.5284993516,-0.7382672381,2.6222706618  
H,0,1.115054752,-0.726888968,-1.672384843  
H,0,1.4502957192,0.9866350563,-1.461406583  
H,0,2.2063934161,-0.1962384694,-0.3858261108  
H,0,-0.8450889944,0.4164439397,-0.5115064865

## mPW1k/6-31+G\*\* (PCM)

mpBBPCMSm

E(RmPW+HF-PW91) = -196.513563299

|                                              |                             |
|----------------------------------------------|-----------------------------|
| Zero-point correction=                       | 0.139364 (Hartree/Particle) |
| Thermal correction to Energy=                | 0.146197                    |
| Thermal correction to Enthalpy=              | 0.147141                    |
| Thermal correction to Gibbs Free Energy=     | 0.109548                    |
| Sum of electronic and zero-point Energies=   | -196.374199                 |
| Sum of electronic and thermal Energies=      | -196.367366                 |
| Sum of electronic and thermal Enthalpies=    | -196.366422                 |
| Sum of electronic and thermal Free Energies= | -196.404015                 |

|       | E (Thermal) | CV             | S              |
|-------|-------------|----------------|----------------|
|       | KCal/Mol    | Cal/Mol-Kelvin | Cal/Mol-Kelvin |
| Total | 91.740      | 23.415         | 79.122         |

C,0,1.2745748936,0.0488636388,-0.8966117963  
C,0,0.0903210638,0.1699483218,0.0036031332  
C,0,0.0392781353,0.0169139186,1.3285684439  
C,0,-1.2529955609,0.178710361,2.0707541493  
C,0,1.2106137898,-0.3195119864,2.1986015729  
H,0,1.0265986166,-1.2478354292,2.7418579321  
H,0,2.1383255748,-0.4336096285,1.6472347625  
H,0,1.3605917247,0.4563087085,2.951187837  
H,0,-1.1761263156,0.9697474179,2.8188330384  
H,0,-2.0758985933,0.4220851166,1.4026533373  
H,0,-1.5100808845,-0.7352883123,2.6090691646  
H,0,1.1097587899,-0.723675248,-1.648837097  
H,0,1.4432940341,0.9799730343,-1.4391941418  
H,0,2.191198512,-0.1956559704,-0.3678217955  
H,0,-0.84065578,0.4142460573,-0.5000525407

## B3LYP/6-31+G\*\* (onsager)

b3BBonssm

E(RB+HF-LYP) = -196.564448855

|                                              |                             |
|----------------------------------------------|-----------------------------|
| Zero-point correction=                       | 0.135775 (Hartree/Particle) |
| Thermal correction to Energy=                | 0.142688                    |
| Thermal correction to Enthalpy=              | 0.143632                    |
| Thermal correction to Gibbs Free Energy=     | 0.105902                    |
| Sum of electronic and zero-point Energies=   | -196.428674                 |
| Sum of electronic and thermal Energies=      | -196.421761                 |
| Sum of electronic and thermal Enthalpies=    | -196.420817                 |
| Sum of electronic and thermal Free Energies= | -196.458547                 |

|       | E (Thermal) | CV             | S              |
|-------|-------------|----------------|----------------|
|       | KCal/Mol    | Cal/Mol-Kelvin | Cal/Mol-Kelvin |
| Total | 89.538      | 23.871         | 79.410         |

C,0,1.281174,0.049832,-0.913481  
C,0,0.090698,0.170404,-0.001984  
C,0,0.037307,0.016731,1.332552  
C,0,-1.26707,0.180537,2.078547

C,0,1.21838,-0.322636,2.210294  
H,0,1.035836,-1.256908,2.758125  
H,0,2.151257,-0.43798,1.655191  
H,0,1.372372,0.457142,2.968183  
H,0,-1.193454,0.977232,2.83135  
H,0,-2.094015,0.425131,1.405393  
H,0,-1.529532,-0.737926,2.621075  
H,0,1.114722,-0.727175,-1.671126  
H,0,1.449537,0.98701,-1.46022  
H,0,2.205558,-0.195646,-0.38523  
H,0,-0.843972,0.415473,-0.508823

### mPW1k/6-31+G\*\* (onsager)

mpBBonssm

E(RmPW+HF-PW91) = -196.512422621

|                                              |                             |
|----------------------------------------------|-----------------------------|
| Zero-point correction=                       | 0.139628 (Hartree/Particle) |
| Thermal correction to Energy=                | 0.146462                    |
| Thermal correction to Enthalpy=              | 0.147406                    |
| Thermal correction to Gibbs Free Energy=     | 0.109808                    |
| Sum of electronic and zero-point Energies=   | -196.372795                 |
| Sum of electronic and thermal Energies=      | -196.365961                 |
| Sum of electronic and thermal Enthalpies=    | -196.365017                 |
| Sum of electronic and thermal Free Energies= | -196.402615                 |

|       | E (Thermal)<br>KCal/Mol | CV<br>Cal/Mol-Kelvin | S<br>Cal/Mol-Kelvin |
|-------|-------------------------|----------------------|---------------------|
| Total | 91.906                  | 23.391               | 79.132              |

C,0,1.273938,0.048915,-0.896002  
C,0,0.090876,0.169738,0.004748  
C,0,0.03946,0.016887,1.328648  
C,0,-1.252996,0.178784,2.070067  
C,0,1.210874,-0.319494,2.198044  
H,0,1.027784,-1.24812,2.740816  
H,0,2.137985,-0.433422,1.645971  
H,0,1.361891,0.456386,2.950159  
H,0,-1.177243,0.970308,2.817557  
H,0,-2.075343,0.422062,1.401744  
H,0,-1.511239,-0.735106,2.607749  
H,0,1.109049,-0.724105,-1.64746  
H,0,1.442746,0.980279,-1.437761  
H,0,2.190288,-0.195556,-0.367117  
H,0,-0.839272,0.413664,-0.497317

### B3LYP/6-311+G\*\* (PCM)

E(RB+HF-LYP) = -196.601942835

|                                              |                             |
|----------------------------------------------|-----------------------------|
| Zero-point correction=                       | 0.134986 (Hartree/Particle) |
| Thermal correction to Energy=                | 0.141932                    |
| Thermal correction to Enthalpy=              | 0.142876                    |
| Thermal correction to Gibbs Free Energy=     | 0.105043                    |
| Sum of electronic and zero-point Energies=   | -196.466957                 |
| Sum of electronic and thermal Energies=      | -196.460011                 |
| Sum of electronic and thermal Enthalpies=    | -196.459067                 |
| Sum of electronic and thermal Free Energies= | -196.496900                 |

|       | E (Thermal)<br>KCal/Mol | CV<br>Cal/Mol-Kelvin | S<br>Cal/Mol-Kelvin |
|-------|-------------------------|----------------------|---------------------|
| Total | 89.064                  | 23.942               | 79.626              |

C,0,1.2803710245,0.0492798883,-0.9089243198  
 C,0,0.0900458354,0.1704180326,0.0003264173  
 C,0,0.0377003568,0.0169581716,1.3307180847  
 C,0,-1.2647711101,0.1802491098,2.0768923456  
 C,0,1.2174265384,-0.3219358739,2.2071777465  
 H,0,1.0335452273,-1.2543357832,2.7542440738  
 H,0,2.1489447446,-0.4366721806,1.6534850005  
 H,0,1.3690948364,0.4567153288,2.9642520319  
 H,0,-1.1895227829,0.9749439934,2.8290671489  
 H,0,-2.0899007956,0.4244829207,1.4044194046  
 H,0,-1.5247928275,-0.7372919801,2.6186183881  
 H,0,1.113296835,-0.7257362089,-1.6661154493  
 H,0,1.4480843964,0.9846479556,-1.4556118891  
 H,0,2.2029901871,-0.196206838,-0.3815268617  
 H,0,-0.8437144658,0.4157044638,-0.5071761221

### B3PW91/6-31G\* (gas phase)

E(RB+HF-PW91) = -196.470833317

|                                              |                             |
|----------------------------------------------|-----------------------------|
| Zero-point correction=                       | 0.137061 (Hartree/Particle) |
| Thermal correction to Energy=                | 0.143923                    |
| Thermal correction to Enthalpy=              | 0.144868                    |
| Thermal correction to Gibbs Free Energy=     | 0.107285                    |
| Sum of electronic and zero-point Energies=   | -196.333772                 |
| Sum of electronic and thermal Energies=      | -196.326910                 |
| Sum of electronic and thermal Enthalpies=    | -196.325966                 |
| Sum of electronic and thermal Free Energies= | -196.363548                 |

|       | E (Thermal)<br>KCal/Mol | CV<br>Cal/Mol-Kelvin | S<br>Cal/Mol-Kelvin |
|-------|-------------------------|----------------------|---------------------|
| Total | 90.313                  | 23.682               | 79.098              |

C,0,1.2769559226,0.049776088,-0.9078337885  
 C,0,0.0921102799,0.169926714,0.0012253378  
 C,0,0.0395426411,0.0163536661,1.3327951034  
 C,0,-1.2616044151,0.1799907637,2.0739807798  
 C,0,1.2160574818,-0.3216617777,2.2074074636  
 H,0,1.0354054672,-1.2564942047,2.7561056454  
 H,0,2.1502518172,-0.4365975409,1.6525867761  
 H,0,1.3713264995,0.4574827964,2.9666491901  
 H,0,-1.1913121314,0.9766610651,2.8281230632  
 H,0,-2.0885614114,0.424865789,1.3997712649  
 H,0,-1.5270981987,-0.7380293357,2.6172157657  
 H,0,1.1103376898,-0.7272156996,-1.6665192308  
 H,0,1.4460207076,0.9870553905,-1.4555621875  
 H,0,2.2027602523,-0.196371947,-0.3807252325  
 H,0,-0.8433946024,0.4154792327,-0.5053739506

### BB1K/6-31G\* (gas phase)

E(RB+HF-B95) = -196.417036669

|                                              |                             |
|----------------------------------------------|-----------------------------|
| Zero-point correction=                       | 0.140146 (Hartree/Particle) |
| Thermal correction to Energy=                | 0.146930                    |
| Thermal correction to Enthalpy=              | 0.147874                    |
| Thermal correction to Gibbs Free Energy=     | 0.110440                    |
| Sum of electronic and zero-point Energies=   | -196.276891                 |
| Sum of electronic and thermal Energies=      | -196.270107                 |
| Sum of electronic and thermal Enthalpies=    | -196.269163                 |
| Sum of electronic and thermal Free Energies= | -196.306597                 |

|                                              | E (Thermal) | CV             | S              |
|----------------------------------------------|-------------|----------------|----------------|
|                                              | KCal/Mol    | Cal/Mol-Kelvin | Cal/Mol-Kelvin |
| Total                                        | 92.200      | 23.293         | 78.787         |
| C,0,1.2713390221,0.0492249314,-0.8939775406  |             |                |                |
| C,0,0.0913689914,0.1692543091,0.0078306844   |             |                |                |
| C,0,0.0412906085,0.0164364869,1.3291416033   |             |                |                |
| C,0,-1.2510987643,0.1787383301,2.0673329582  |             |                |                |
| C,0,1.2112137706,-0.3195721464,2.1977338338  |             |                |                |
| H,0,1.0294984114,-1.2483068426,2.7417498004  |             |                |                |
| H,0,2.1385865315,-0.4336717901,1.6450606706  |             |                |                |
| H,0,1.3637306135,0.4557625114,2.9508063052   |             |                |                |
| H,0,-1.1790730141,0.9707573314,2.8154426015  |             |                |                |
| H,0,-2.071361972,0.4218447258,1.3956446133   |             |                |                |
| H,0,-1.5128465073,-0.7342194066,2.6059806109 |             |                |                |
| H,0,1.1065165618,-0.7236173493,-1.6464261318 |             |                |                |
| H,0,1.4401532466,0.9806812632,-1.4366777746  |             |                |                |
| H,0,2.1887668893,-0.195311853,-0.3662205027  |             |                |                |
| H,0,-0.8392863891,0.4132204988,-0.4935757319 |             |                |                |

### BPW91/6-31G\* (gas phase)

E(RB-PW91) = -196.501309862

|                                              |                             |
|----------------------------------------------|-----------------------------|
| Zero-point correction=                       | 0.133575 (Hartree/Particle) |
| Thermal correction to Energy=                | 0.140534                    |
| Thermal correction to Enthalpy=              | 0.141478                    |
| Thermal correction to Gibbs Free Energy=     | 0.103732                    |
| Sum of electronic and zero-point Energies=   | -196.367735                 |
| Sum of electronic and thermal Energies=      | -196.360776                 |
| Sum of electronic and thermal Enthalpies=    | -196.359831                 |
| Sum of electronic and thermal Free Energies= | -196.397578                 |

|                                              | E (Thermal) | CV             | S              |
|----------------------------------------------|-------------|----------------|----------------|
|                                              | KCal/Mol    | Cal/Mol-Kelvin | Cal/Mol-Kelvin |
| Total                                        | 88.187      | 24.203         | 79.444         |
| C,0,1.2812528853,0.0502576621,-0.9188264109  |             |                |                |
| C,0,0.0921091315,0.1706806043,-0.004779528   |             |                |                |
| C,0,0.0382649845,0.0161072032,1.3371032636   |             |                |                |
| C,0,-1.2704938138,0.181071471,2.079403199    |             |                |                |
| C,0,1.2209369932,-0.3235464289,2.2151943027  |             |                |                |
| H,0,1.0416501213,-1.2641630494,2.7684136742  |             |                |                |
| H,0,2.1605263276,-0.4389090653,1.6562195293  |             |                |                |
| H,0,1.3792796843,0.4591214768,2.980256975    |             |                |                |
| H,0,-1.2026503753,0.9823810484,2.8390683588  |             |                |                |
| H,0,-2.1015954648,0.4274685185,1.3999541795  |             |                |                |
| H,0,-1.5402823342,-0.741563898,2.6268936496  |             |                |                |
| H,0,1.1140818128,-0.7307740025,-1.6834748922 |             |                |                |
| H,0,1.4516383901,0.9927472104,-1.4713899509  |             |                |                |
| H,0,2.2136950522,-0.1974263071,-0.3900679335 |             |                |                |
| H,0,-0.8496153946,0.4177685565,-0.5141224162 |             |                |                |

### MPW3LYP/6-31G\* (gas phase)

E(RmPW+HF-LYP) = -196.538789991

|                                 |                             |
|---------------------------------|-----------------------------|
| Zero-point correction=          | 0.136962 (Hartree/Particle) |
| Thermal correction to Energy=   | 0.143791                    |
| Thermal correction to Enthalpy= | 0.144736                    |

Thermal correction to Gibbs Free Energy= 0.107243  
 Sum of electronic and zero-point Energies= -196.401828  
 Sum of electronic and thermal Energies= -196.394999  
 Sum of electronic and thermal Enthalpies= -196.394054  
 Sum of electronic and thermal Free Energies= -196.431547

|       | E (Thermal)<br>KCal/Mol | CV<br>Cal/Mol-Kelvin | S<br>Cal/Mol-Kelvin |
|-------|-------------------------|----------------------|---------------------|
| Total | 90.230                  | 23.621               | 78.910              |

C,0,1.2788994426,0.0498388004,-0.9113024445  
 C,0,0.0910969893,0.1702192583,0.0005051554  
 C,0,0.0387403197,0.016645675,1.3317690291  
 C,0,-1.2647825263,0.1803779267,2.0758644653  
 C,0,1.2179403818,-0.3222701114,2.2092279369  
 H,0,1.0366118495,-1.2567388664,2.7583325028  
 H,0,2.1519499679,-0.4373008901,1.6547637787  
 H,0,1.3725434309,0.4567398913,2.9687488814  
 H,0,-1.1938470767,0.9766930866,2.830313941  
 H,0,-2.0917222832,0.4251672221,1.4019197419  
 H,0,-1.5295083776,-0.7375907909,2.6195451066  
 H,0,1.1122117054,-0.7270065644,-1.6700339495  
 H,0,1.447797395,0.9870354767,-1.4591014032  
 H,0,2.2041393882,-0.1962250452,-0.3837150496  
 H,0,-0.8432726064,0.4156359313,-0.5069916923

### mpwb1k/6-31G\* (gas phase)

E(RmPW+HF-B95) = -196.413423684

Zero-point correction= 0.140507 (Hartree/Particle)  
 Thermal correction to Energy= 0.147276  
 Thermal correction to Enthalpy= 0.148220  
 Thermal correction to Gibbs Free Energy= 0.110819  
 Sum of electronic and zero-point Energies= -196.272917  
 Sum of electronic and thermal Energies= -196.266148  
 Sum of electronic and thermal Enthalpies= -196.265204  
 Sum of electronic and thermal Free Energies= -196.302604

|       | E (Thermal)<br>KCal/Mol | CV<br>Cal/Mol-Kelvin | S<br>Cal/Mol-Kelvin |
|-------|-------------------------|----------------------|---------------------|
| Total | 92.417                  | 23.238               | 78.717              |

C,0,1.2706690057,0.0491087276,-0.8919318431  
 C,0,0.0910239324,0.1692657722,0.0083000157  
 C,0,0.0412478441,0.016537987,1.3283912772  
 C,0,-1.2495885307,0.1785304042,2.0666116881  
 C,0,1.2103071619,-0.319182397,2.1959790997  
 H,0,1.0283599581,-1.2472325242,2.7395879878  
 H,0,2.1370214797,-0.4331995411,1.6435299707  
 H,0,1.3623976248,0.4557315353,2.948488522  
 H,0,-1.1769074533,0.9699062118,2.8142528771  
 H,0,-2.0695506553,0.4214719768,1.3956628364  
 H,0,-1.5104523714,-0.7339746646,2.6049472958  
 H,0,1.1065081815,-0.7233663534,-1.6437468837  
 H,0,1.4399269774,0.9798424346,-1.4341321041  
 H,0,2.1868677675,-0.1952834473,-0.3633738069  
 H,0,-0.8390329222,0.4130648781,-0.4927209326

### MPWB195/6-31G\* (gas phase)

E(RmPW+HF-B95) = -196.411756375



```

Zero-point correction= 0.138408 (Hartree/Particle)
Thermal correction to Energy= 0.145232
Thermal correction to Enthalpy= 0.146176
Thermal correction to Gibbs Free Energy= 0.108684
Sum of electronic and zero-point Energies= -196.273348
Sum of electronic and thermal Energies= -196.266524
Sum of electronic and thermal Enthalpies= -196.265580
Sum of electronic and thermal Free Energies= -196.303073

```

|       | E (Thermal) | CV             | S              |
|-------|-------------|----------------|----------------|
|       | KCal/Mol    | Cal/Mol-Kelvin | Cal/Mol-Kelvin |
| Total | 91.134      | 23.533         | 78.909         |

```

C,0,1.2729447262,0.0493627109,-0.8978140249
C,0,0.090982323,0.1696621569,0.0051453441
C,0,0.040494904,0.0164246744,1.3305948031
C,0,-1.2543479729,0.1791099099,2.0695277072
C,0,1.2129122193,-0.3201673815,2.2000155329
H,0,1.0316999989,-1.2514626163,2.7462410812
H,0,2.1427756172,-0.4344265646,1.6453585753
H,0,1.3666436462,0.4566959728,2.9559008434
H,0,-1.1829712604,0.9730702448,2.820346119
H,0,-2.0767497405,0.422949489,1.395699589
H,0,-1.517588879,-0.7360238044,2.6102918841
H,0,1.1085933595,-0.7254336576,-1.652983668
H,0,1.4430752886,0.9830254346,-1.4427301495
H,0,2.1928758055,-0.1959056052,-0.368226949
H,0,-0.8425420357,0.4143400361,-0.4975206879

```

## MPWLYP1M/6-31G\* (gas phase)

E(RmPW+HF-LYP) = -196.402310024

```

Zero-point correction= 0.134116 (Hartree/Particle)
Thermal correction to Energy= 0.141022
Thermal correction to Enthalpy= 0.141966
Thermal correction to Gibbs Free Energy= 0.104340
Sum of electronic and zero-point Energies= -196.268194
Sum of electronic and thermal Energies= -196.261288
Sum of electronic and thermal Enthalpies= -196.260344
Sum of electronic and thermal Free Energies= -196.297970

```

|       | E (Thermal) | CV             | S              |
|-------|-------------|----------------|----------------|
|       | KCal/Mol    | Cal/Mol-Kelvin | Cal/Mol-Kelvin |
| Total | 88.492      | 24.026         | 79.190         |

```

C,0,1.2834393229,0.0501753475,-0.921089999
C,0,0.0904286932,0.1709850765,-0.0049354639
C,0,0.0370831564,0.0165612198,1.33462026
C,0,-1.2733789116,0.181393051,2.0812644389
C,0,1.2225241479,-0.3239760092,2.2156095283
H,0,1.0419603701,-1.2631315279,2.7685852444
H,0,2.1610003497,-0.4395180667,1.6577291714
H,0,1.379452402,0.4581466756,2.9798474487
H,0,-1.2037118803,0.9815227522,2.8402947482
H,0,-2.104334457,0.4273682832,1.4036885866
H,0,-1.5408944434,-0.7405325103,2.6286856917
H,0,1.116422002,-0.7301041694,-1.6846910453
H,0,1.4535182058,0.9917541094,-1.4727443092
H,0,2.2139043513,-0.1971518122,-0.3915990795
H,0,-0.8486153088,0.4177285804,-0.5154192211

```

## PBE1KCIS/6-31G\* (gas phase)

E(RPBE+HF-KCIS) = -196.265451800

|                                              |                             |
|----------------------------------------------|-----------------------------|
| Zero-point correction=                       | 0.137043 (Hartree/Particle) |
| Thermal correction to Energy=                | 0.143840                    |
| Thermal correction to Enthalpy=              | 0.144784                    |
| Thermal correction to Gibbs Free Energy=     | 0.107416                    |
| Sum of electronic and zero-point Energies=   | -196.128409                 |
| Sum of electronic and thermal Energies=      | -196.121612                 |
| Sum of electronic and thermal Enthalpies=    | -196.120668                 |
| Sum of electronic and thermal Free Energies= | -196.158036                 |

|       | E (Thermal)<br>KCal/Mol | CV<br>Cal/Mol-Kelvin | S<br>Cal/Mol-Kelvin |
|-------|-------------------------|----------------------|---------------------|
| Total | 90.261                  | 23.663               | 78.647              |

C,0,1.2755619175,0.0498341809,-0.9061491009  
C,0,0.0928883683,0.1697788953,0.0012030319  
C,0,0.0394214747,0.01640248,1.3326347901  
C,0,-1.2592565922,0.1796881326,2.0727175429  
C,0,1.2140480116,-0.3210479004,2.2056730494  
H,0,1.0339774147,-1.2553807828,2.7556520178  
H,0,2.1494271025,-0.4364004442,1.6526321887  
H,0,1.3695712961,0.4571058495,2.9660518736  
H,0,-1.1896253086,0.9756144268,2.8278976433  
H,0,-2.0875190834,0.424646563,1.4000139071  
H,0,-1.5251434413,-0.7376736936,2.6171374264  
H,0,1.1105539749,-0.726618305,-1.6658418476  
H,0,1.4459855278,0.9862636391,-1.4550525619  
H,0,2.202299746,-0.1963674298,-0.3801954177  
H,0,-0.8433924085,0.4153753886,-0.5045285431

## PBE1W/6-31G\* (gas phase)

E(RPBE+HF-PBE) = -219.042651887

|                                              |                             |
|----------------------------------------------|-----------------------------|
| Zero-point correction=                       | 0.204598 (Hartree/Particle) |
| Thermal correction to Energy=                | 0.210222                    |
| Thermal correction to Enthalpy=              | 0.211166                    |
| Thermal correction to Gibbs Free Energy=     | 0.176386                    |
| Sum of electronic and zero-point Energies=   | -218.838054                 |
| Sum of electronic and thermal Energies=      | -218.832430                 |
| Sum of electronic and thermal Enthalpies=    | -218.831486                 |
| Sum of electronic and thermal Free Energies= | -218.866265                 |

|       | E (Thermal)<br>KCal/Mol | CV<br>Cal/Mol-Kelvin | S<br>Cal/Mol-Kelvin |
|-------|-------------------------|----------------------|---------------------|
| Total | 131.916                 | 18.349               | 73.200              |

C,0,1.14782813,0.0416006425,-0.6359230473  
C,0,0.1224817908,0.1469632,0.1396677467  
C,0,0.0775216831,0.0148331207,1.2848739208  
C,0,-1.0387787587,0.1547122257,1.9247395193  
C,0,1.0924600034,-0.2758362243,2.0317736258  
H,0,0.9404224729,-1.0615199565,2.4875957593  
H,0,1.8724589001,-0.3704829598,1.5578890626  
H,0,1.2229949538,0.3802976378,2.6647317959  
H,0,-0.9724815435,0.8240748747,2.5539745497  
H,0,-1.7353096322,0.3603601238,1.3617213197  
H,0,-1.2549179592,-0.6182866874,2.3765526922  
H,0,1.0089440409,-0.6129847859,-1.2686467412

H,0,1.2913690389,0.8291581221,-1.0911811743  
H,0,1.9179542558,-0.1651138669,-0.1816848366  
H,0,-0.6641493761,0.3534455336,-0.2862381927

## PBELYP1W/6-31G\* (gas phase)

E(RPBE+HF-V5LYP) = -212.754028832

|                                              |                             |
|----------------------------------------------|-----------------------------|
| Zero-point correction=                       | 0.188890 (Hartree/Particle) |
| Thermal correction to Energy=                | 0.194731                    |
| Thermal correction to Enthalpy=              | 0.195676                    |
| Thermal correction to Gibbs Free Energy=     | 0.160349                    |
| Sum of electronic and zero-point Energies=   | -212.565138                 |
| Sum of electronic and thermal Energies=      | -212.559297                 |
| Sum of electronic and thermal Enthalpies=    | -212.558353                 |
| Sum of electronic and thermal Free Energies= | -212.593680                 |

|       | E (Thermal) | CV             | S              |
|-------|-------------|----------------|----------------|
|       | KCal/Mol    | Cal/Mol-Kelvin | Cal/Mol-Kelvin |
| Total | 122.196     | 19.119         | 74.351         |

C,0,1.177600496,0.0431335189,-0.6958324605  
C,0,0.1130497067,0.1525947703,0.1086215945  
C,0,0.0677692581,0.0157720285,1.2925754781  
C,0,-1.0886827679,0.1602442296,1.9593857722  
C,0,1.1199103556,-0.2857803789,2.068910828  
H,0,0.9605313469,-1.1023151214,2.5432414756  
H,0,1.9313065446,-0.38436763,1.5777330915  
H,0,1.2541578864,0.3964092724,2.727487738  
H,0,-1.0187160827,0.855802618,2.6140867214  
H,0,-1.8127900914,0.3740529987,1.3742031093  
H,0,-1.3123738264,-0.6435979189,2.4296257104  
H,0,1.034497864,-0.6375171924,-1.3538027171  
H,0,1.3280369967,0.8615762072,-1.169336904  
H,0,1.9773980183,-0.1717240834,-0.2224437832  
H,0,-0.7028977048,0.3669376814,-0.3346096541

## RHF/6-31G\* (gas phase)

E(RHF) = -195.145768043

|                                              |                             |
|----------------------------------------------|-----------------------------|
| Zero-point correction=                       | 0.145810 (Hartree/Particle) |
| Thermal correction to Energy=                | 0.152439                    |
| Thermal correction to Enthalpy=              | 0.153384                    |
| Thermal correction to Gibbs Free Energy=     | 0.116135                    |
| Sum of electronic and zero-point Energies=   | -194.999958                 |
| Sum of electronic and thermal Energies=      | -194.993329                 |
| Sum of electronic and thermal Enthalpies=    | -194.992384                 |
| Sum of electronic and thermal Free Energies= | -195.029633                 |

|       | E (Thermal) | CV             | S              |
|-------|-------------|----------------|----------------|
|       | KCal/Mol    | Cal/Mol-Kelvin | Cal/Mol-Kelvin |
| Total | 95.657      | 22.352         | 78.396         |

C,0,1.2781933496,0.0498665473,-0.9104265738  
C,0,0.0936048567,0.1686026658,0.0096627408  
C,0,0.0426565631,0.0167331275,1.324716443  
C,0,-1.2602686267,0.1799902603,2.0718329441  
C,0,1.2163064673,-0.322246434,2.2116693498  
H,0,1.0270336751,-1.247429243,2.7513571392  
H,0,2.1451389681,-0.4379458683,1.6711839031

H,0,1.3604657451,0.4535737953,2.9602527377  
H,0,-1.1841536432,0.9699725791,2.8159210061  
H,0,-2.0804026515,0.4224998503,1.4062880451  
H,0,-1.5174579614,-0.7318603566,2.6065391992  
H,0,1.1025697049,-0.7198304036,-1.6582087724  
H,0,1.4356224112,0.9813594656,-1.4489364307  
H,0,2.1988336736,-0.1934955086,-0.3972509436  
H,0,-0.829344532,0.411430523,-0.4947547877

## TPSSKCIS/6-31G\* (gas phase)

E(RTPSS+HF-KCIS) = -196.532042290

|                                              |                             |
|----------------------------------------------|-----------------------------|
| Zero-point correction=                       | 0.137414 (Hartree/Particle) |
| Thermal correction to Energy=                | 0.144240                    |
| Thermal correction to Enthalpy=              | 0.145184                    |
| Thermal correction to Gibbs Free Energy=     | 0.107749                    |
| Sum of electronic and zero-point Energies=   | -196.394628                 |
| Sum of electronic and thermal Energies=      | -196.387803                 |
| Sum of electronic and thermal Enthalpies=    | -196.386858                 |
| Sum of electronic and thermal Free Energies= | -196.424293                 |

|       | E (Thermal)<br>KCal/Mol | CV<br>Cal/Mol-Kelvin | S<br>Cal/Mol-Kelvin |
|-------|-------------------------|----------------------|---------------------|
| Total | 90.512                  | 23.648               | 78.788              |

C,0,1.2786085741,0.0497641338,-0.9102088454  
C,0,0.0908838352,0.1702700981,0.0003732718  
C,0,0.0390722672,0.0163762076,1.3333884259  
C,0,-1.2647955107,0.1803902765,2.0757943542  
C,0,1.2186462731,-0.3224120165,2.2092345874  
H,0,1.0376054605,-1.2561425726,2.7566288815  
H,0,2.1501519,-0.4367081436,1.6526946508  
H,0,1.3733277404,0.4562295808,2.9669019696  
H,0,-1.1938630841,0.9763430417,2.8284079214  
H,0,-2.0887823631,0.4247854536,1.400320803  
H,0,-1.5293098485,-0.7368087159,2.6177978867  
H,0,1.1114774052,-0.7264595363,-1.6673430081  
H,0,1.4467751538,0.9862022092,-1.4565741007  
H,0,2.2016743386,-0.1960207444,-0.3813550465  
H,0,-0.8426741416,0.4154117278,-0.5062157517

## TPSSLYP1W/6-31G\* (gas phase)

E(RTPSS+HF-V5LYP) = -219.319217973

|                                              |                             |
|----------------------------------------------|-----------------------------|
| Zero-point correction=                       | 0.207054 (Hartree/Particle) |
| Thermal correction to Energy=                | 0.212617                    |
| Thermal correction to Enthalpy=              | 0.213561                    |
| Thermal correction to Gibbs Free Energy=     | 0.178927                    |
| Sum of electronic and zero-point Energies=   | -219.112164                 |
| Sum of electronic and thermal Energies=      | -219.106601                 |
| Sum of electronic and thermal Enthalpies=    | -219.105657                 |
| Sum of electronic and thermal Free Energies= | -219.140291                 |

|       | E (Thermal)<br>KCal/Mol | CV<br>Cal/Mol-Kelvin | S<br>Cal/Mol-Kelvin |
|-------|-------------------------|----------------------|---------------------|
| Total | 133.419                 | 18.204               | 72.893              |

C,0,1.1507153979,0.0412441608,-0.6377723334  
C,0,0.1191856411,0.147669491,0.1390934502

C,0,0.0760740129,0.015304241,1.2833833727  
 C,0,-1.0432279757,0.1552162929,1.9277846216  
 C,0,1.0957473413,-0.2765064354,2.0321128727  
 H,0,0.9426316318,-1.0612239628,2.485842838  
 H,0,1.8718339576,-0.3699391746,1.5552698515  
 H,0,1.2249146331,0.3795747454,2.6629601711  
 H,0,-0.9741788222,0.8236691413,2.5552307652  
 H,0,-1.7370233212,0.3604460913,1.3641245971  
 H,0,-1.2564359842,-0.6175926275,2.377889542  
 H,0,1.0117802675,-0.6131643887,-1.268152988  
 H,0,1.2940547687,0.8281165598,-1.0907842148  
 H,0,1.9158859707,-0.1651038768,-0.1787341078  
 H,0,-0.6631595193,0.3535107421,-0.2884024381

### BP86/6-31G\* (gas phase)

E(RB-P86) = -196.528002219

|                                              |                             |
|----------------------------------------------|-----------------------------|
| Zero-point correction=                       | 0.132948 (Hartree/Particle) |
| Thermal correction to Energy=                | 0.139904                    |
| Thermal correction to Enthalpy=              | 0.140849                    |
| Thermal correction to Gibbs Free Energy=     | 0.103135                    |
| Sum of electronic and zero-point Energies=   | -196.395054                 |
| Sum of electronic and thermal Energies=      | -196.388098                 |
| Sum of electronic and thermal Enthalpies=    | -196.387154                 |
| Sum of electronic and thermal Free Energies= | -196.424867                 |

|       | E (Thermal)<br>KCal/Mol | CV<br>Cal/Mol-Kelvin | S<br>Cal/Mol-Kelvin |
|-------|-------------------------|----------------------|---------------------|
| Total | 87.791                  | 24.265               | 79.374              |

C,0,1.2819616616,0.050005017,-0.9182584002  
 C,0,0.0901423395,0.1712741934,-0.0063676226  
 C,0,0.0369062392,0.0164948498,1.336449644  
 C,0,-1.2714235648,0.1811302623,2.0804998677  
 C,0,1.2213190565,-0.3233431679,2.2132858135  
 H,0,1.0425366657,-1.2659505147,2.7678180305  
 H,0,2.1620238797,-0.4384001989,1.6514790044  
 H,0,1.3806017477,0.4604625925,2.9802689071  
 H,0,-1.2026857771,0.9835444548,2.842241796  
 H,0,-2.1046260643,0.428148383,1.4001688538  
 H,0,-1.5409682961,-0.7434118325,2.6295074057  
 H,0,1.1171701932,-0.7330053928,-1.6845073234  
 H,0,1.4554347584,0.9937344136,-1.4720462193  
 H,0,2.2140980887,-0.1982975725,-0.3843047544  
 H,0,-0.8536929278,0.4188355128,-0.5163890027

### TS for Oxaziridine Inversion B3LYP/6-31G\*

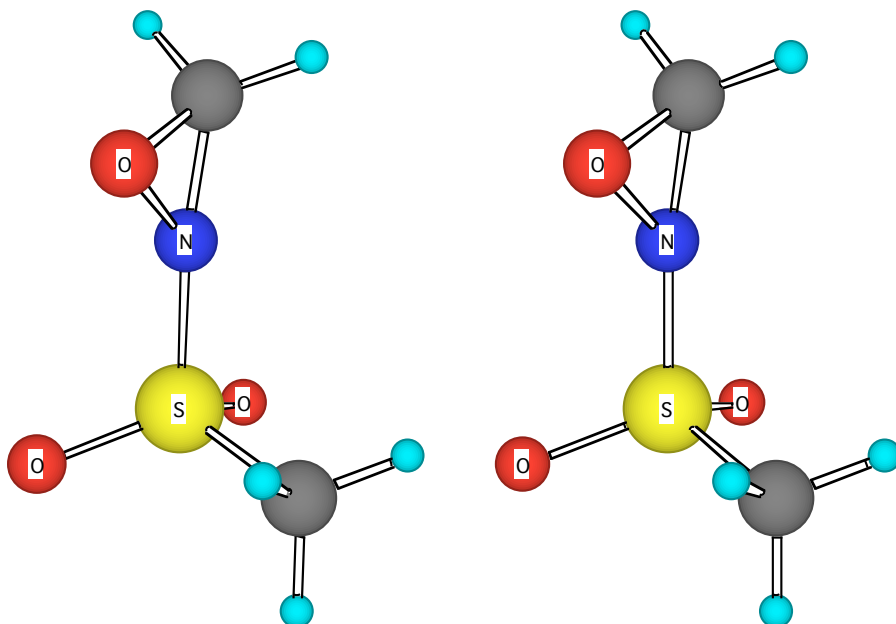

E(RB+HF-LYP) = -757.621010976

Zero-point correction= 0.083079 (Hartree/Particle)  
 Thermal correction to Energy= 0.090185  
 Thermal correction to Enthalpy= 0.091129  
 Thermal correction to Gibbs Free Energy= 0.051331  
 Sum of electronic and zero-point Energies= -757.537932  
 Sum of electronic and thermal Energies= -757.530826  
 Sum of electronic and thermal Enthalpies= -757.529882  
 Sum of electronic and thermal Free Energies= -757.569680

|       | E (Thermal) | CV             | S              |
|-------|-------------|----------------|----------------|
|       | KCAL/MOL    | CAL/MOL-KELVIN | CAL/MOL-KELVIN |
| TOTAL | 56.592      | 24.430         | 83.763         |

Standard orientation:

| Center Number | Atomic Number | Atomic Type | Coordinates (Angstroms) |           |           |
|---------------|---------------|-------------|-------------------------|-----------|-----------|
|               |               |             | X                       | Y         | Z         |
| 1             | 8             | 0           | 1.971300                | -0.792031 | 0.349943  |
| 2             | 6             | 0           | 2.236374                | 0.435547  | -0.357399 |
| 3             | 7             | 0           | 0.914332                | 0.136182  | -0.057977 |
| 4             | 16            | 0           | -0.721450               | 0.153335  | 0.129848  |
| 5             | 8             | 0           | -1.103439               | 1.485113  | -0.332206 |
| 6             | 8             | 0           | -1.048885               | -0.346694 | 1.457497  |
| 7             | 6             | 0           | -1.308923               | -1.069820 | -1.056467 |
| 8             | 1             | 0           | 2.576818                | 0.319066  | -1.388097 |
| 9             | 1             | 0           | 2.728188                | 1.215118  | 0.226013  |
| 10            | 1             | 0           | -2.392823               | -1.146287 | -0.941270 |
| 11            | 1             | 0           | -0.835355               | -2.026046 | -0.825289 |
| 12            | 1             | 0           | -1.050479               | -0.733947 | -2.061764 |

## TS for 3-phenyl-2-methanesulfonyloxaziridine Inversion

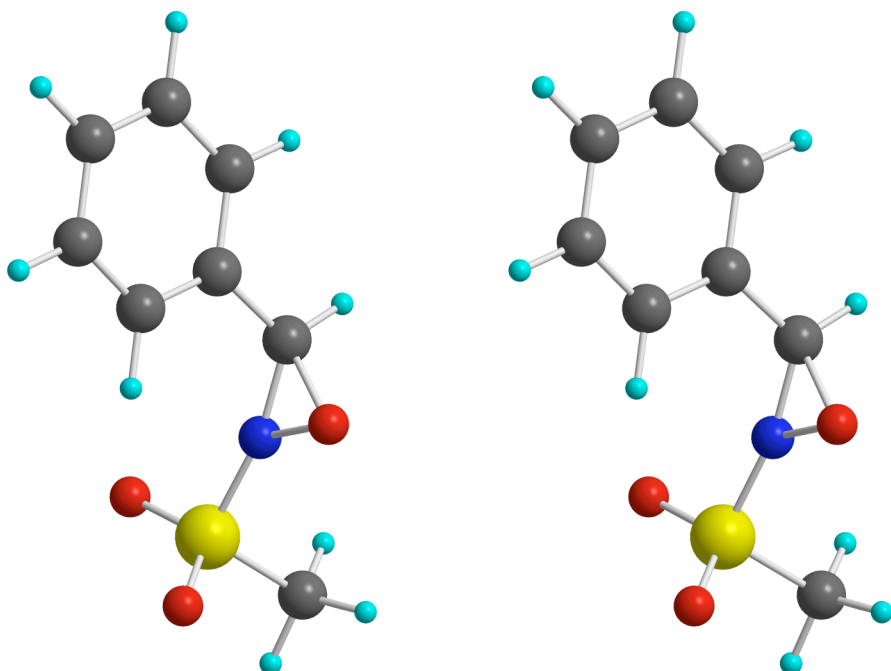

E(RB+HF-LYP) = -988.724386105

|                                              |                             |
|----------------------------------------------|-----------------------------|
| Zero-point correction=                       | 0.163098 (Hartree/Particle) |
| Thermal correction to Energy=                | 0.174779                    |
| Thermal correction to Enthalpy=              | 0.175723                    |
| Thermal correction to Gibbs Free Energy=     | 0.123906                    |
| Sum of electronic and zero-point Energies=   | -988.561288                 |
| Sum of electronic and thermal Energies=      | -988.549607                 |
| Sum of electronic and thermal Enthalpies=    | -988.548663                 |
| Sum of electronic and thermal Free Energies= | -988.600480                 |

|       | E (Thermal) | CV             | S              |
|-------|-------------|----------------|----------------|
|       | KCal/Mol    | Cal/Mol-Kelvin | Cal/Mol-Kelvin |
| Total | 109.676     | 43.731         | 109.058        |

C,0,3.7200125257,-5.1370570039,-1.7539592083  
 C,0,2.8606724929,-4.2517292179,-1.107993817  
 C,0,3.3521857692,-3.4258415088,-0.0867226142  
 C,0,4.7004664613,-3.4954774845,0.2823970681  
 C,0,5.5597255259,-4.3870506604,-0.3652988215  
 C,0,5.0691773389,-5.2068975986,-1.3833670792  
 C,0,2.4687386203,-2.4512077415,0.602125926  
 N,0,1.0860612843,-2.6440693648,0.6873991792  
 S,0,-0.430324308,-3.196107642,1.0219260169  
 C,0,-1.1789589171,-1.8842515213,2.007196693  
 O,0,1.5841757282,-1.6203664826,-0.222922406  
 O,0,-0.1966981104,-4.3611289256,1.875803847  
 O,0,-1.1854079099,-3.2794118656,-0.2253361184  
 H,0,2.9321539277,-1.8926107725,1.417590582  
 H,0,5.0787877063,-2.8548491461,1.0752467791  
 H,0,6.6045557778,-4.4403646851,-0.0749766278  
 H,0,5.7340016176,-5.9024355227,-1.8872185332  
 H,0,3.3398803344,-5.7774357206,-2.5440630205  
 H,0,1.8124332996,-4.1939276206,-1.3835831809  
 H,0,-2.2108803396,-2.1804643011,2.2062741821  
 H,0,-0.6137190514,-1.7874268678,2.9343434186  
 H,0,-1.1511527736,-0.963534346,1.422239735

## B3LYP/6-31+G\*\* (PCM)

E(RB+HF-LYP) = -988.738451758

|                                              |                             |
|----------------------------------------------|-----------------------------|
| Zero-point correction=                       | 0.162241 (Hartree/Particle) |
| Thermal correction to Energy=                | 0.173940                    |
| Thermal correction to Enthalpy=              | 0.174885                    |
| Thermal correction to Gibbs Free Energy=     | 0.122956                    |
| Sum of electronic and zero-point Energies=   | -988.576210                 |
| Sum of electronic and thermal Energies=      | -988.564511                 |
| Sum of electronic and thermal Enthalpies=    | -988.563567                 |
| Sum of electronic and thermal Free Energies= | -988.615496                 |

|       | E (Thermal)<br>KCal/Mol | CV<br>Cal/Mol-Kelvin | S<br>Cal/Mol-Kelvin |
|-------|-------------------------|----------------------|---------------------|
| Total | 109.149                 | 43.858               | 109.294             |

C,0,3.7247020027,-5.1520943098,-1.7480404856  
C,0,2.8628562733,-4.2540587577,-1.1215931347  
C,0,3.3475195958,-3.4178458932,-0.1042432325  
C,0,4.6923746879,-3.4890657081,0.2817083296  
C,0,5.5536104961,-4.3939032835,-0.3461168481  
C,0,5.0699608489,-5.2242251371,-1.3603339459  
C,0,2.4716913256,-2.4301547842,0.5711006629  
N,0,1.0833034499,-2.6145459499,0.6740575039  
S,0,-0.4236685718,-3.1664771429,1.005304792  
C,0,-1.1752207111,-1.9028590709,2.0427129413  
O,0,1.5697574091,-1.6148810965,-0.2628398404  
O,0,-0.1950602615,-4.3726123049,1.8100507317  
O,0,-1.1898094981,-3.2202290362,-0.2431894665  
H,0,2.9371372066,-1.8518125785,1.373269459  
H,0,5.0649959621,-2.8388632429,1.0720363857  
H,0,6.5968218832,-4.4488657851,-0.0428694851  
H,0,5.737952744,-5.9304694654,-1.8494116817  
H,0,3.3494225241,-5.8004672164,-2.5368495267  
H,0,1.8190445792,-4.1977041907,-1.4171421662  
H,0,-2.1992432971,-2.2221068584,2.250756756  
H,0,-0.5917684882,-1.8276281299,2.9612242608  
H,0,-1.1704921604,-0.9627780574,1.4875099907

## Epoxidation TS Isomer 1

B3LYP/6-31G\*



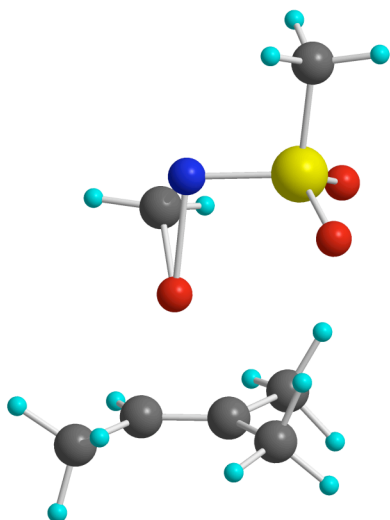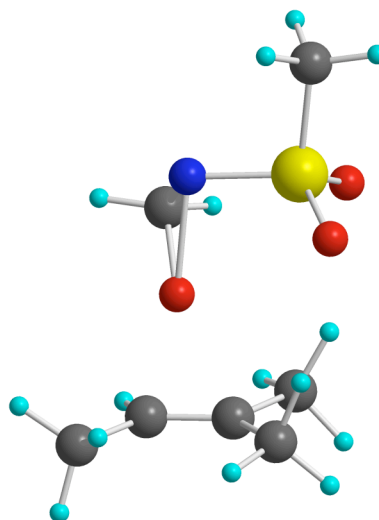

E(RB+HF-LYP) = -954.183237966

|                                              |                             |
|----------------------------------------------|-----------------------------|
| Zero-point correction=                       | 0.221013 (Hartree/Particle) |
| Thermal correction to Energy=                | 0.236268                    |
| Thermal correction to Enthalpy=              | 0.237212                    |
| Thermal correction to Gibbs Free Energy=     | 0.178334                    |
| Sum of electronic and zero-point Energies=   | -953.962225                 |
| Sum of electronic and thermal Energies=      | -953.946970                 |
| Sum of electronic and thermal Enthalpies=    | -953.946026                 |
| Sum of electronic and thermal Free Energies= | -954.004904                 |

|       | E (Thermal) | CV             | S              |
|-------|-------------|----------------|----------------|
|       | KCAL/MOL    | CAL/MOL-KELVIN | CAL/MOL-KELVIN |
| TOTAL | 148.260     | 53.729         | 123.920        |

Standard orientation:

| Center Number | Atomic Number | Atomic Type |   | Coordinates (Angstroms) |           |           |
|---------------|---------------|-------------|---|-------------------------|-----------|-----------|
|               |               |             |   | X                       | Y         | Z         |
| 1             | 6             | 0           | C | 2.678581                | -0.569886 | -0.329174 |
| 2             | 6             | 0           | C | 2.232722                | 0.723894  | -0.119572 |
| 3             | 8             | 0           | O | 0.661504                | -0.777185 | -0.006249 |
| 4             | 6             | 0           | C | -0.138995               | -1.171253 | -1.116749 |
| 5             | 7             | 0           | N | -1.192441               | -1.333954 | -0.186565 |
| 6             | 16            | 0           | S | -1.966755               | 0.144393  | 0.165154  |
| 7             | 8             | 0           | O | -1.807827               | 1.113911  | -0.941968 |
| 8             | 8             | 0           | O | -1.658010               | 0.587565  | 1.533190  |
| 9             | 6             | 0           | C | 3.260752                | -1.511483 | 0.680400  |
| 10            | 6             | 0           | C | 2.109642                | 1.350540  | 1.238147  |
| 11            | 6             | 0           | C | 1.842035                | 1.598690  | -1.276294 |
| 12            | 6             | 0           | C | -3.672160               | -0.442364 | 0.161605  |
| 13            | 1             | 0           | H | 2.771583                | -0.885112 | -1.368048 |
| 14            | 1             | 0           | H | 0.167541                | -2.130956 | -1.548587 |
| 15            | 1             | 0           | H | -0.240335               | -0.386136 | -1.875091 |
| 16            | 1             | 0           | H | 2.951810                | -2.537666 | 0.458001  |
| 17            | 1             | 0           | H | 2.948500                | -1.281372 | 1.700533  |
| 18            | 1             | 0           | H | 4.359116                | -1.484681 | 0.639956  |
| 19            | 1             | 0           | H | 2.583401                | 2.340257  | 1.240182  |
| 20            | 1             | 0           | H | 2.555197                | 0.751121  | 2.033419  |
| 21            | 1             | 0           | H | 1.047173                | 1.491775  | 1.472949  |
| 22            | 1             | 0           | H | 0.800978                | 1.928259  | -1.169124 |
| 23            | 1             | 0           | H | 1.951336                | 1.090211  | -2.238759 |
| 24            | 1             | 0           | H | 2.468288                | 2.501041  | -1.291120 |

|    |   |   |   |           |           |           |
|----|---|---|---|-----------|-----------|-----------|
| 25 | 1 | 0 | H | -4.297365 | 0.405220  | 0.452306  |
| 26 | 1 | 0 | H | -3.760792 | -1.251576 | 0.887763  |
| 27 | 1 | 0 | H | -3.932061 | -0.786163 | -0.840856 |

### B3LYP/6-31G\* (Onsager)

E(RB+HF-LYP) = -954.184915292

|                                              |                             |
|----------------------------------------------|-----------------------------|
| Zero-point correction=                       | 0.220941 (Hartree/Particle) |
| Thermal correction to Energy=                | 0.236269                    |
| Thermal correction to Enthalpy=              | 0.237214                    |
| Thermal correction to Gibbs Free Energy=     | 0.177978                    |
| Sum of electronic and zero-point Energies=   | -953.963974                 |
| Sum of electronic and thermal Energies=      | -953.948646                 |
| Sum of electronic and thermal Enthalpies=    | -953.947702                 |
| Sum of electronic and thermal Free Energies= | -954.006938                 |

|       |             |                |                |
|-------|-------------|----------------|----------------|
|       | E (Thermal) | CV             | S              |
|       | KCAL/MOL    | CAL/MOL-KELVIN | CAL/MOL-KELVIN |
| TOTAL | 148.261     | 53.812         | 124.673        |

Standard orientation:

| Center Number | Atomic Number | Atomic Type | Coordinates (Angstroms) |           |           |           |
|---------------|---------------|-------------|-------------------------|-----------|-----------|-----------|
|               |               |             | X                       | Y         | Z         |           |
| 1             | 6             | 0           | C                       | 2.718071  | -0.558822 | -0.341007 |
| 2             | 6             | 0           | C                       | 2.244016  | 0.720828  | -0.125750 |
| 3             | 8             | 0           | O                       | 0.645135  | -0.759130 | 0.026718  |
| 4             | 6             | 0           | C                       | -0.132951 | -1.188132 | -1.078997 |
| 5             | 7             | 0           | N                       | -1.184313 | -1.328621 | -0.136414 |
| 6             | 16            | 0           | S                       | -1.984018 | 0.144561  | 0.165960  |
| 7             | 8             | 0           | O                       | -1.803447 | 1.109542  | -0.940657 |
| 8             | 8             | 0           | O                       | -1.739669 | 0.600748  | 1.542689  |
| 9             | 6             | 0           | C                       | 3.318678  | -1.499058 | 0.656898  |
| 10            | 6             | 0           | C                       | 2.129759  | 1.349665  | 1.232488  |
| 11            | 6             | 0           | C                       | 1.836901  | 1.593724  | -1.279362 |
| 12            | 6             | 0           | C                       | -3.682874 | -0.463980 | 0.099308  |
| 13            | 1             | 0           | H                       | 2.795860  | -0.874848 | -1.381020 |
| 14            | 1             | 0           | H                       | 0.177220  | -2.158985 | -1.481064 |
| 15            | 1             | 0           | H                       | -0.241086 | -0.426334 | -1.859278 |
| 16            | 1             | 0           | H                       | 2.998742  | -2.525088 | 0.448646  |
| 17            | 1             | 0           | H                       | 3.043035  | -1.261268 | 1.685801  |
| 18            | 1             | 0           | H                       | 4.415155  | -1.481267 | 0.580054  |
| 19            | 1             | 0           | H                       | 2.661577  | 2.309763  | 1.246004  |
| 20            | 1             | 0           | H                       | 2.526690  | 0.723842  | 2.032925  |
| 21            | 1             | 0           | H                       | 1.074126  | 1.552344  | 1.449707  |
| 22            | 1             | 0           | H                       | 0.793763  | 1.913697  | -1.166611 |
| 23            | 1             | 0           | H                       | 1.946772  | 1.087794  | -2.243011 |
| 24            | 1             | 0           | H                       | 2.455878  | 2.500901  | -1.298024 |
| 25            | 1             | 0           | H                       | -4.328578 | 0.380243  | 0.353341  |
| 26            | 1             | 0           | H                       | -3.793086 | -1.266614 | 0.829759  |
| 27            | 1             | 0           | H                       | -3.897337 | -0.821447 | -0.909163 |

\*\*Optimizations of this transition state structure using B3LYP/6-31+G\*\* and mPW1K/6-31+G\*\* give isomer 3.

## Epoxidation TS Isomer 2

B3LYP/6-31+G\*\* (PCM)

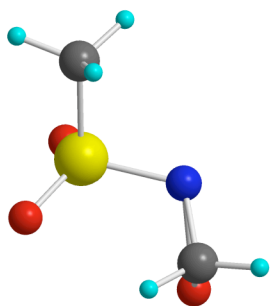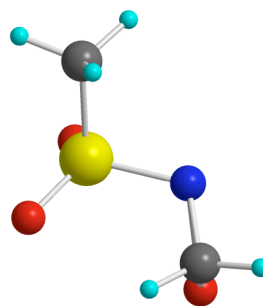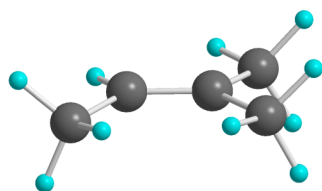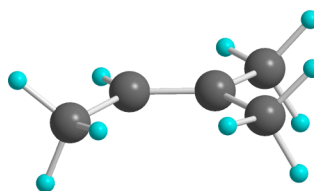

filename: b3BBPCmts2  
E(RB+HF-LYP) = -954.239856537

|                                              |                             |
|----------------------------------------------|-----------------------------|
| Zero-point correction=                       | 0.218593 (Hartree/Particle) |
| Thermal correction to Energy=                | 0.234145                    |
| Thermal correction to Enthalpy=              | 0.235089                    |
| Thermal correction to Gibbs Free Energy=     | 0.174778                    |
| Sum of electronic and zero-point Energies=   | -954.021264                 |
| Sum of electronic and thermal Energies=      | -954.005712                 |
| Sum of electronic and thermal Enthalpies=    | -954.004768                 |
| Sum of electronic and thermal Free Energies= | -954.065078                 |

|       | E (Thermal) | CV             | S              |
|-------|-------------|----------------|----------------|
|       | KCal/Mol    | Cal/Mol-Kelvin | Cal/Mol-Kelvin |
| Total | 146.928     | 54.401         | 126.935        |
| 1     | 6           | 0              | -2.171250      |
| 2     | 6           | 0              | 0.751228       |
| 3     | 8           | 0              | -0.270235      |
| 4     | 6           | 0              | -0.455922      |
| 5     | 7           | 0              | -0.057943      |
| 6     | 16          | 0              | -0.138322      |
| 7     | 8           | 0              | 1.202706       |
| 8     | 8           | 0              | 0.710056       |
| 9     | 6           | 0              | 2.257658       |
| 10    | 6           | 0              | 0.001947       |
| 11    | 6           | 0              | 2.035508       |
| 12    | 6           | 0              | 1.462193       |
| 13    | 1           | 0              | 2.379588       |
| 14    | 1           | 0              | -0.576652      |
| 15    | 1           | 0              | 2.145349       |
| 16    | 1           | 0              | -1.947910      |
| 17    | 1           | 0              | 2.145349       |
| 18    | 1           | 0              | -3.437585      |
| 19    | 1           | 0              | -0.180349      |
| 20    | 1           | 0              | -3.153707      |
| 21    | 1           | 0              | -1.543300      |
| 22    | 1           | 0              | 3.749843       |
| 23    | 1           | 0              | -0.422025      |
| 24    | 1           | 0              | 0.725031       |
| 25    | 1           | 0              | -1.874131      |
|       |             |                | 0.582505       |
|       |             |                | -1.808885      |
|       |             |                | -0.479590      |
|       |             |                | 2.461132       |
|       |             |                | -0.479590      |
|       |             |                | 2.269785       |
|       |             |                | 0.791674       |
|       |             |                | -0.820236      |
|       |             |                | 2.835454       |
|       |             |                | -0.184017      |
|       |             |                | 1.163401       |
|       |             |                | -3.136982      |
|       |             |                | 0.715776       |
|       |             |                | 1.770327       |
|       |             |                | -3.160144      |
|       |             |                | -1.061719      |
|       |             |                | 1.816170       |
|       |             |                | -2.835153      |
|       |             |                | -2.415411      |
|       |             |                | -0.318248      |
|       |             |                | -2.657526      |
|       |             |                | -1.573316      |
|       |             |                | -1.873360      |
|       |             |                | -4.236796      |
|       |             |                | -1.642525      |
|       |             |                | -1.057739      |
|       |             |                | -0.465485      |
|       |             |                | -0.630990      |
|       |             |                | 2.048145       |
|       |             |                | 0.182253       |
|       |             |                | 0.933628       |
|       |             |                | 1.360097       |
|       |             |                | 4.579642       |
|       |             |                | 0.053456       |
|       |             |                | 0.196156       |

|    |   |   |          |           |          |
|----|---|---|----------|-----------|----------|
| 26 | 1 | 0 | 3.860086 | -1.507136 | 0.723067 |
| 27 | 1 | 0 | 3.664301 | -0.032510 | 1.740562 |

### B3LYP/6-31+G\*\* (gas phase)

Filename:b3BBgasts2

E(RB+HF-LYP) = -954.224838655

|                                              |                             |
|----------------------------------------------|-----------------------------|
| Zero-point correction=                       | 0.219271 (Hartree/Particle) |
| Thermal correction to Energy=                | 0.234668                    |
| Thermal correction to Enthalpy=              | 0.235612                    |
| Thermal correction to Gibbs Free Energy=     | 0.175961                    |
| Sum of electronic and zero-point Energies=   | -954.005568                 |
| Sum of electronic and thermal Energies=      | -953.990171                 |
| Sum of electronic and thermal Enthalpies=    | -953.989226                 |
| Sum of electronic and thermal Free Energies= | -954.048877                 |

|       | E (Thermal) | CV             | S              |
|-------|-------------|----------------|----------------|
|       | KCal/Mol    | Cal/Mol-Kelvin | Cal/Mol-Kelvin |
| Total | 147.256     | 54.178         | 125.546        |

C,0,-0.3442667198,-2.5257887593,0.1249227148  
 C,0,1.0323156212,-2.6514179864,0.0380501049  
 O,0,0.2034725262,-0.5739393854,0.0416812057  
 C,0,0.3244453371,0.1923029956,1.2395671248  
 N,0,0.0450374579,1.3214367107,0.4330063251  
 S,0,-1.6317836538,1.5719966694,0.1972506482  
 O,0,-2.4316022457,0.8732736292,1.2307156552  
 O,0,-1.9857768873,1.3858884621,-1.2170556339  
 C,0,-1.2209585059,-2.7125640689,1.324948684  
 C,0,1.9308017566,-2.8697217753,1.22159967  
 C,0,1.7069312723,-2.6493001859,-1.3041095812  
 C,0,-1.6876906866,3.3429664776,0.5399014616  
 H,0,-0.8797941371,-2.4580390456,-0.8185102581  
 H,0,-1.9871873249,-1.9310333542,1.3530405229  
 H,0,-0.6774005952,-2.706893356,2.2720949654  
 H,0,-1.7430305921,-3.6752267956,1.2437207052  
 H,0,2.3910786236,-3.8651411138,1.1545393599  
 H,0,1.4155304128,-2.8032099424,2.1808174804  
 H,0,2.7559413356,-2.1475549848,1.2157797467  
 H,0,2.5370331827,-1.9345490782,-1.3211275981  
 H,0,1.0141846862,-2.3906746729,-2.1072414468  
 H,0,2.1314612521,-3.6415610433,-1.5127259782  
 H,0,1.346944658,0.2206400061,1.6308613264  
 H,0,-0.4148320534,-0.0852885601,1.9989472724  
 H,0,-2.7165402433,3.6570507317,0.3519805163  
 H,0,-0.9995545184,3.8446626534,-0.1407126686  
 H,0,-1.413759959,3.5156857721,1.5810576752

### B3LYP/6-31+G\*\* (onsager)

Filename: b3BBonsts2

E(RB+HF-LYP) = -954.228198248

|                                              |                             |
|----------------------------------------------|-----------------------------|
| Zero-point correction=                       | 0.219132 (Hartree/Particle) |
| Thermal correction to Energy=                | 0.234626                    |
| Thermal correction to Enthalpy=              | 0.235570                    |
| Thermal correction to Gibbs Free Energy=     | 0.175316                    |
| Sum of electronic and zero-point Energies=   | -954.009066                 |
| Sum of electronic and thermal Energies=      | -953.993572                 |
| Sum of electronic and thermal Enthalpies=    | -953.992628                 |
| Sum of electronic and thermal Free Energies= | -954.052882                 |

|                                               | E (Thermal)<br>KCal/Mol | CV<br>Cal/Mol-Kelvin | S<br>Cal/Mol-Kelvin |
|-----------------------------------------------|-------------------------|----------------------|---------------------|
| Total                                         | 147.230                 | 54.285               | 126.815             |
| C,0,-0.3390557227,-2.6246669423,0.156062536   |                         |                      |                     |
| C,0,1.0369661781,-2.6789381818,0.0546511354   |                         |                      |                     |
| O,0,0.1017905267,-0.5784590818,-0.0155803086  |                         |                      |                     |
| C,0,0.224001123,0.1866638728,1.1709912296     |                         |                      |                     |
| N,0,-0.0032051722,1.2962132226,0.3112388358   |                         |                      |                     |
| S,0,-1.6536793135,1.662027211,0.0767360611    |                         |                      |                     |
| O,0,-2.5387576464,0.9105823611,0.9942364778   |                         |                      |                     |
| O,0,-1.9639820198,1.6750534329,-1.3610853419  |                         |                      |                     |
| C,0,-1.184339423,-2.8113606006,1.3787799911   |                         |                      |                     |
| C,0,1.9603312361,-2.8224979623,1.2298571801   |                         |                      |                     |
| C,0,1.6965988304,-2.6748379724,-1.2948139882  |                         |                      |                     |
| C,0,-1.6180285961,3.3838340391,0.6304736515   |                         |                      |                     |
| H,0,-0.8901882773,-2.6066854909,-0.7808356451 |                         |                      |                     |
| H,0,-2.0040756222,-2.085873697,1.3852307763   |                         |                      |                     |
| H,0,-0.6286404024,-2.7226916314,2.3145275321  |                         |                      |                     |
| H,0,-1.6380370004,-3.8113264315,1.3577472383  |                         |                      |                     |
| H,0,2.4461490717,-3.8070948017,1.1945655328   |                         |                      |                     |
| H,0,1.4613155943,-2.7337464591,2.1955937109   |                         |                      |                     |
| H,0,2.7671922175,-2.0820133824,1.1800473766   |                         |                      |                     |
| H,0,2.4728199627,-1.9033242505,-1.3444747816  |                         |                      |                     |
| H,0,0.9798260017,-2.4968610621,-2.0991537798  |                         |                      |                     |
| H,0,2.1919337061,-3.6393648372,-1.4718905217  |                         |                      |                     |
| H,0,1.2366451466,0.1990646054,1.5865952897    |                         |                      |                     |
| H,0,-0.5434805491,-0.0445945915,1.9174537598  |                         |                      |                     |
| H,0,-2.6217875472,3.7798618499,0.4610343813   |                         |                      |                     |
| H,0,-0.8813003143,3.9221415254,0.0338617784   |                         |                      |                     |
| H,0,-1.3660119882,3.4128952562,1.6911498923   |                         |                      |                     |

### B3LYP/6-31G\* (gas phase)

At this level isomer 2 is a second order saddle point (NImag=2).  
E(RB+HF-LYP) = -954.179209699

|                                              |                             |
|----------------------------------------------|-----------------------------|
| Zero-point correction=                       | 0.221052 (Hartree/Particle) |
| Thermal correction to Energy=                | 0.235483                    |
| Thermal correction to Enthalpy=              | 0.236427                    |
| Thermal correction to Gibbs Free Energy=     | 0.179535                    |
| Sum of electronic and zero-point Energies=   | -953.958158                 |
| Sum of electronic and thermal Energies=      | -953.943727                 |
| Sum of electronic and thermal Enthalpies=    | -953.942783                 |
| Sum of electronic and thermal Free Energies= | -953.999675                 |

|       | E (Thermal)<br>KCAL/MOL | CV<br>CAL/MOL-KELVIN | S<br>CAL/MOL-KELVIN |
|-------|-------------------------|----------------------|---------------------|
| TOTAL | 147.768                 | 51.694               | 119.740             |

Standard orientation:

| Center<br>Number | Atomic<br>Number | Atomic<br>Type |   | Coordinates (Angstroms) |           |           |
|------------------|------------------|----------------|---|-------------------------|-----------|-----------|
|                  |                  |                |   | X                       | Y         | Z         |
| 1                | 6                | 0              | C | -2.012648               | 0.642481  | -0.825914 |
| 2                | 6                | 0              | C | -2.855092               | -0.239908 | -0.166367 |
| 3                | 8                | 0              | O | -0.640618               | -0.526293 | -0.046413 |
| 4                | 6                | 0              | C | -0.014489               | -0.160810 | 1.176354  |
| 5                | 7                | 0              | N | 1.113668                | -0.899921 | 0.743928  |
| 6                | 16               | 0              | S | 2.253653                | 0.078578  | -0.046356 |
| 7                | 8                | 0              | O | 2.776993                | 1.060512  | 0.923822  |

|    |   |   |   |           |           |           |
|----|---|---|---|-----------|-----------|-----------|
| 8  | 8 | 0 | O | 1.796153  | 0.577697  | -1.355119 |
| 9  | 6 | 0 | C | -1.698118 | 2.062326  | -0.462217 |
| 10 | 6 | 0 | C | -3.504930 | 0.050005  | 1.155644  |
| 11 | 6 | 0 | C | -3.203747 | -1.558128 | -0.794929 |
| 12 | 6 | 0 | C | 3.516201  | -1.171489 | -0.329394 |
| 13 | 1 | 0 | H | -1.715887 | 0.366381  | -1.833570 |
| 14 | 1 | 0 | H | -0.641780 | 2.265625  | -0.665316 |
| 15 | 1 | 0 | H | -1.912045 | 2.308650  | 0.581013  |
| 16 | 1 | 0 | H | -2.287366 | 2.741247  | -1.093665 |
| 17 | 1 | 0 | H | -4.597101 | 0.074195  | 1.027634  |
| 18 | 1 | 0 | H | -3.199926 | 1.001255  | 1.595699  |
| 19 | 1 | 0 | H | -3.299389 | -0.750782 | 1.877268  |
| 20 | 1 | 0 | H | -3.022447 | -2.380924 | -0.093078 |
| 21 | 1 | 0 | H | -2.617215 | -1.744534 | -1.697454 |
| 22 | 1 | 0 | H | -4.271383 | -1.589204 | -1.056701 |
| 23 | 1 | 0 | H | -0.493617 | -0.612643 | 2.053105  |
| 24 | 1 | 0 | H | 0.098948  | 0.923479  | 1.302353  |
| 25 | 1 | 0 | H | 4.345924  | -0.671606 | -0.833800 |
| 26 | 1 | 0 | H | 3.099201  | -1.958267 | -0.959554 |
| 27 | 1 | 0 | H | 3.836680  | -1.572876 | 0.632901  |

## mPW1K/6-31+G\*\* (PCM)

filename: mpBBPCMts2

E(RmpW+HF-PW91) = -954.047406116

|                                              |                             |
|----------------------------------------------|-----------------------------|
| Zero-point correction=                       | 0.226233 (Hartree/Particle) |
| Thermal correction to Energy=                | 0.241133                    |
| Thermal correction to Enthalpy=              | 0.242077                    |
| Thermal correction to Gibbs Free Energy=     | 0.183642                    |
| Sum of electronic and zero-point Energies=   | -953.821174                 |
| Sum of electronic and thermal Energies=      | -953.806274                 |
| Sum of electronic and thermal Enthalpies=    | -953.805329                 |
| Sum of electronic and thermal Free Energies= | -953.863764                 |

|       | E (Thermal)<br>KCal/Mol | CV<br>Cal/Mol-Kelvin | S<br>Cal/Mol-Kelvin |
|-------|-------------------------|----------------------|---------------------|
| Total | 151.313                 | 52.543               | 122.987             |

C,0,-0.3648045373,-2.5998182339,0.1617801306  
C,0,0.9987826602,-2.621485764,0.0559355198  
O,0,0.1009515926,-0.583306526,0.0051552767  
C,0,0.2297920084,0.1352714135,1.1970590791  
N,0,0.0292194351,1.2254821215,0.3321001269  
S,0,-1.5631452601,1.6059746407,0.0643076886  
O,0,-2.4625201328,0.8322912844,0.9137968726  
O,0,-1.8222786571,1.6109572498,-1.3655784555  
C,0,-1.1872252301,-2.7785939108,1.3863515212  
C,0,1.923762777,-2.7356993592,1.2179958852  
C,0,1.6482211563,-2.6162894978,-1.2849228409  
C,0,-1.582804543,3.2847505953,0.6175704  
H,0,-0.9216776548,-2.595856151,-0.7676678129  
H,0,-2.0002041726,-2.0550899822,1.4000608386  
H,0,-0.6230689167,-2.6904621027,2.309848248  
H,0,-1.6436142317,-3.769569639,1.3696522253  
H,0,2.4101287412,-3.7127806537,1.1938413944  
H,0,1.4327580396,-2.6327071391,2.1797936951  
H,0,2.7189813984,-1.9938863129,1.1471244945  
H,0,2.4035475086,-1.8338261033,-1.3428287126  
H,0,0.9281295293,-2.4640477774,-2.0831562331  
H,0,2.1576130568,-3.5672809127,-1.4517829354  
H,0,1.2320719509,0.122038188,1.6167776444

H,0,-0.5495716298,-0.0854452062,1.923377552  
H,0,-2.582609664,3.6657129945,0.4269053763  
H,0,-0.8478455261,3.8454515037,0.0502744154  
H,0,-1.3615906983,3.3122182804,1.6792286059

## mPW1K/6-31+G\*\* (gas phase)

filename: mpBBgasts2

E(RmPW+HF-PW91) = -954.031679331

|                                              |                             |
|----------------------------------------------|-----------------------------|
| Zero-point correction=                       | 0.226873 (Hartree/Particle) |
| Thermal correction to Energy=                | 0.241660                    |
| Thermal correction to Enthalpy=              | 0.242604                    |
| Thermal correction to Gibbs Free Energy=     | 0.184593                    |
| Sum of electronic and zero-point Energies=   | -953.804807                 |
| Sum of electronic and thermal Energies=      | -953.790019                 |
| Sum of electronic and thermal Enthalpies=    | -953.789075                 |
| Sum of electronic and thermal Free Energies= | -953.847087                 |

|       | E (Thermal) | CV             | S              |
|-------|-------------|----------------|----------------|
|       | KCal/Mol    | Cal/Mol-Kelvin | Cal/Mol-Kelvin |
| Total | 151.644     | 52.346         | 122.096        |

C,0,-0.367704,-2.496616,0.136783  
C,0,0.997845,-2.597237,0.046784  
O,0,0.19677,-0.590913,0.03769  
C,0,0.337414,0.150512,1.225658  
N,0,0.072925,1.250844,0.405772  
S,0,-1.553747,1.500665,0.152756  
O,0,-2.354155,0.753776,1.117724  
O,0,-1.869917,1.371962,-1.253446  
C,0,-1.228156,-2.65423,1.337554  
C,0,1.897246,-2.783437,1.219848  
C,0,1.662017,-2.601314,-1.287192  
C,0,-1.655391,3.219521,0.563153  
H,0,-0.905054,-2.444524,-0.80015  
H,0,-1.967074,-1.854825,1.366735  
H,0,-0.676215,-2.65928,2.272389  
H,0,-1.772303,-3.596736,1.266283  
H,0,2.348235,-3.776455,1.176624  
H,0,1.39099,-2.688577,2.174384  
H,0,2.719162,-2.068893,1.18647  
H,0,2.467934,-1.87,-1.316858  
H,0,0.963602,-2.371689,-2.08559  
H,0,2.104974,-3.580331,-1.480302  
H,0,1.35513,0.15915,1.608272  
H,0,-0.405797,-0.111996,1.976805  
H,0,-2.679262,3.524746,0.368819  
H,0,-0.968926,3.765029,-0.074278  
H,0,-1.409544,3.354851,1.610313

## mPW1K/6-31+G\*\* (onsager)

filename: mpBBonsts2

E(RmPW+HF-PW91) = -954.034879393

|                                 |                             |
|---------------------------------|-----------------------------|
| Zero-point correction=          | 0.226752 (Hartree/Particle) |
| Thermal correction to Energy=   | 0.241631                    |
| Thermal correction to Enthalpy= | 0.242576                    |

Thermal correction to Gibbs Free Energy= 0.183972  
 Sum of electronic and zero-point Energies= -953.808128  
 Sum of electronic and thermal Energies= -953.793248  
 Sum of electronic and thermal Enthalpies= -953.792304  
 Sum of electronic and thermal Free Energies= -953.850907

|       | E (Thermal)<br>KCal/Mol | CV<br>Cal/Mol-Kelvin | S<br>Cal/Mol-Kelvin |
|-------|-------------------------|----------------------|---------------------|
| Total | 151.626                 | 52.434               | 123.341             |

C,0,-0.3603389983,-2.5609804452,0.1570913209  
 C,0,1.0051702246,-2.6201647809,0.0615854169  
 O,0,0.1215868591,-0.6012161721,-0.0211406934  
 C,0,0.2635842781,0.1481628005,1.1536574976  
 N,0,0.0315864036,1.2310184064,0.2940342335  
 S,0,-1.5752202869,1.5722177945,0.0579388086  
 O,0,-2.4355586816,0.7769390464,0.9250315904  
 O,0,-1.8680926786,1.6156483943,-1.3598617488  
 C,0,-1.2028014236,-2.711278426,1.3721612693  
 C,0,1.9173200091,-2.7441234134,1.232294179  
 C,0,1.6631560498,-2.6391026975,-1.2748984641  
 C,0,-1.6082668876,3.243786276,0.6497449073  
 H,0,-0.9051968361,-2.5582517349,-0.7769983978  
 H,0,-1.9888201047,-1.9582652122,1.373752676  
 H,0,-0.6449573657,-2.6400839037,2.300618158  
 H,0,-1.6884346767,-3.6877880289,1.3542237048  
 H,0,2.3855735011,-3.7298580242,1.2210726891  
 H,0,1.4199424579,-2.6260086741,2.1886754241  
 H,0,2.7279535103,-2.0194239049,1.1646989221  
 H,0,2.4342922071,-1.872801132,-1.3329303806  
 H,0,0.9521095298,-2.4728541458,-2.0780521562  
 H,0,2.1529510941,-3.6014475249,-1.4335591449  
 H,0,1.2750371898,0.1483226468,1.5513886226  
 H,0,-0.4961637215,-0.0801842529,1.8989819329  
 H,0,-2.615288771,3.6141766892,0.4814877948  
 H,0,-0.8879108956,3.8235490477,0.0839734209  
 H,0,-1.3722129866,3.2540143716,1.7080284172

### Epoxidation TS Isomer 3

B3LYP/6-31+G\*\* (PCM)

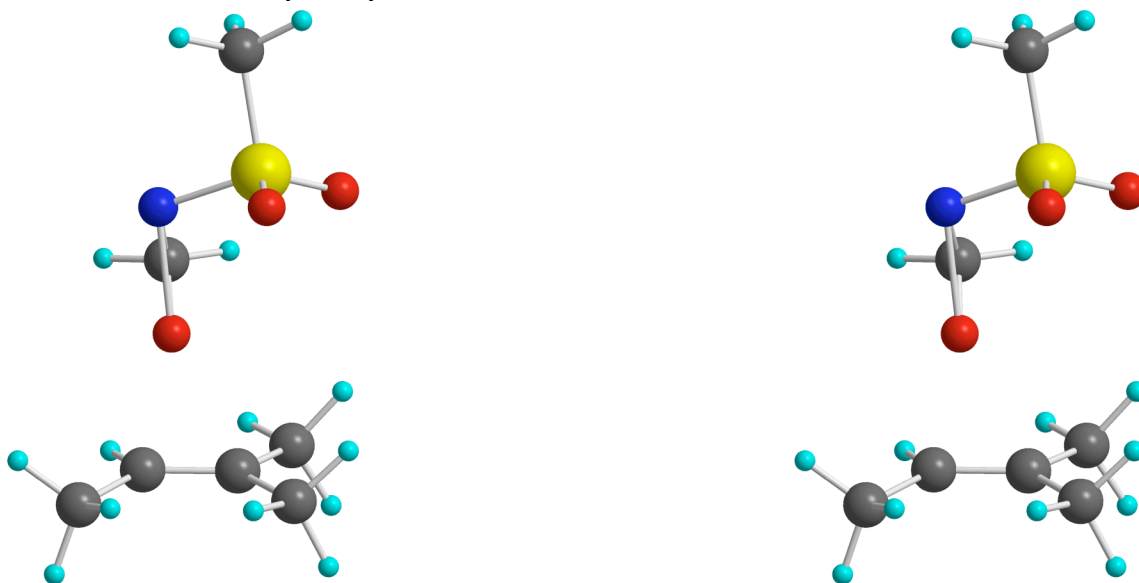



filename: b3BBpcmfreqts3  
 E(RB+HF-LYP) = -954.240209492

Zero-point correction= 0.218465 (Hartree/Particle)  
 Thermal correction to Energy= 0.234124  
 Thermal correction to Enthalpy= 0.235068  
 Thermal correction to Gibbs Free Energy= 0.174414  
 Sum of electronic and zero-point Energies= -954.021744  
 Sum of electronic and thermal Energies= -954.006086  
 Sum of electronic and thermal Enthalpies= -954.005142  
 Sum of electronic and thermal Free Energies= -954.065795

|       | E (Thermal) |   | CV             |           | S              |
|-------|-------------|---|----------------|-----------|----------------|
|       | KCal/Mol    |   | Cal/Mol-Kelvin |           | Cal/Mol-Kelvin |
| Total | 146.915     |   | 54.448         |           | 127.656        |
| 1     | 6           | 0 | 2.716519       | -0.683723 | -0.390018      |
| 2     | 6           | 0 | 2.502665       | 0.616619  | 0.008441       |
| 3     | 8           | 0 | 0.559501       | -0.663987 | -0.206959      |
| 4     | 6           | 0 | -0.171784      | -0.517727 | -1.406782      |
| 5     | 7           | 0 | -1.222399      | -1.057405 | -0.607949      |
| 6     | 16          | 0 | -2.123931      | 0.111729  | 0.254398       |
| 7     | 8           | 0 | -1.805185      | 1.496240  | -0.165479      |
| 8     | 8           | 0 | -2.075349      | -0.208315 | 1.693025       |
| 9     | 6           | 0 | 3.043032       | -1.861097 | 0.476149       |
| 10    | 6           | 0 | 2.444788       | 1.054446  | 1.442148       |
| 11    | 6           | 0 | 2.385210       | 1.717970  | -1.008466      |
| 12    | 6           | 0 | -3.773003      | -0.299032 | -0.345304      |
| 13    | 1           | 0 | 2.805983       | -0.856921 | -1.463745      |
| 14    | 1           | 0 | 0.130740       | -1.204889 | -2.203693      |
| 15    | 1           | 0 | -0.268704      | 0.519459  | -1.742909      |
| 16    | 1           | 0 | 2.558894       | -2.762238 | 0.087724       |
| 17    | 1           | 0 | 2.732900       | -1.728108 | 1.514182       |
| 18    | 1           | 0 | 4.126569       | -2.043711 | 0.464643       |
| 19    | 1           | 0 | 3.327809       | 1.665538  | 1.675844       |
| 20    | 1           | 0 | 2.408272       | 0.223637  | 2.146896       |
| 21    | 1           | 0 | 1.566473       | 1.688132  | 1.607217       |
| 22    | 1           | 0 | 1.463420       | 2.292366  | -0.858878      |
| 23    | 1           | 0 | 2.409341       | 1.342208  | -2.034907      |
| 24    | 1           | 0 | 3.216743       | 2.425282  | -0.884771      |
| 25    | 1           | 0 | -4.465965      | 0.350710  | 0.195148       |
| 26    | 1           | 0 | -3.970642      | -1.347954 | -0.121075      |
| 27    | 1           | 0 | -3.818440      | -0.105571 | -1.418094      |

### B3LYP/6-31+G\*\* (gas phase)

Filename: b3BBgasts3  
 E(RB+HF-LYP) = -954.226564654

Zero-point correction= 0.218975 (Hartree/Particle)  
 Thermal correction to Energy= 0.234559  
 Thermal correction to Enthalpy= 0.235503  
 Thermal correction to Gibbs Free Energy= 0.174774  
 Sum of electronic and zero-point Energies= -954.007590  
 Sum of electronic and thermal Energies= -953.992006  
 Sum of electronic and thermal Enthalpies= -953.991062  
 Sum of electronic and thermal Free Energies= -954.051791

|       | E (Thermal) |  | CV             |  | S              |
|-------|-------------|--|----------------|--|----------------|
|       | KCal/Mol    |  | Cal/Mol-Kelvin |  | Cal/Mol-Kelvin |
| Total | 147.188     |  | 54.290         |  | 127.815        |

C,0,-1.4789574629,-2.0771300378,-1.1689888233  
 C,0,-0.2462763687,-2.3223654214,-0.5894509574  
 O,0,-0.9233642464,-0.2325371338,-0.3889771487  
 C,0,-0.5331769701,0.7839849678,-1.3083193678  
 N,0,-0.6351592442,1.6710276821,-0.2094097196  
 S,0,0.7811504188,1.6977650691,0.7520477865  
 O,0,1.9547687788,1.1979652697,-0.0025712425  
 O,0,0.5099714608,1.1339065092,2.0830349405  
 C,0,-2.8323589566,-2.2779358795,-0.5589248971  
 C,0,-0.063598984,-2.7068192923,0.8481140905  
 C,0,1.0136038394,-2.2555610582,-1.4051232662  
 C,0,0.9479326752,3.4834378042,0.9436019388  
 H,0,-1.4751812735,-1.8685516321,-2.2383479172  
 H,0,-1.2942151336,0.9952823781,-2.0673066326  
 H,0,0.4610915776,0.6143892108,-1.7368853538  
 H,0,-3.522711964,-1.5065029139,-0.9121947834  
 H,0,-2.8142690653,-2.2383130308,0.5309818607  
 H,0,-3.2442923108,-3.2503451518,-0.8624365415  
 H,0,0.3734397246,-3.712711521,0.9070813912  
 H,0,-0.9909222902,-2.698513893,1.4200298249  
 H,0,0.6390577985,-2.0171167929,1.3280231132  
 H,0,1.713726093,-1.5339574026,-0.9678631739  
 H,0,0.8229760649,-1.9798673314,-2.4457433654  
 H,0,1.5135080497,-3.2331083611,-1.3957753153  
 H,0,1.7984530716,3.6409918231,1.6101187447  
 H,0,0.0299332163,3.866371439,1.3898318315  
 H,0,1.1321845012,3.9318327006,-0.0330990166

### B3LYP/6-31+G\*\* (onsager)

Filename: b3BBonsts3  
 E(RB+HF-LYP) = -954.228622521

|                                              |                             |
|----------------------------------------------|-----------------------------|
| Zero-point correction=                       | 0.219019 (Hartree/Particle) |
| Thermal correction to Energy=                | 0.234595                    |
| Thermal correction to Enthalpy=              | 0.235539                    |
| Thermal correction to Gibbs Free Energy=     | 0.174989                    |
| Sum of electronic and zero-point Energies=   | -954.009603                 |
| Sum of electronic and thermal Energies=      | -953.994027                 |
| Sum of electronic and thermal Enthalpies=    | -953.993083                 |
| Sum of electronic and thermal Free Energies= | -954.053634                 |

|       | E (Thermal) | CV             | S              |
|-------|-------------|----------------|----------------|
|       | KCal/Mol    | Cal/Mol-Kelvin | Cal/Mol-Kelvin |
| Total | 147.211     | 54.330         | 127.439        |

C,0,-1.4812220564,-2.0781914159,-1.171300172  
 C,0,-0.2462225242,-2.3636150654,-0.6254689063  
 O,0,-0.87861155,-0.2253681534,-0.315431978  
 C,0,-0.4733512278,0.7786432044,-1.2304901218  
 N,0,-0.6455506175,1.6545480572,-0.1254681876  
 S,0,0.7366438042,1.7736706429,0.8731209566  
 O,0,1.9384196994,1.1865875171,0.2390326061  
 O,0,0.39615278,1.3819325212,2.2492889413  
 C,0,-2.8275205708,-2.269818903,-0.5452022938  
 C,0,-0.0468845265,-2.8140577225,0.7915620642  
 C,0,0.9990948479,-2.302923828,-1.4647846849  
 C,0,0.9213958436,3.5716303472,0.8580049774  
 H,0,-1.4932560338,-1.8241075978,-2.2306731943  
 H,0,-1.2056063354,0.9759546053,-2.0203491694  
 H,0,0.5424949726,0.63252749,-1.6133044604  
 H,0,-3.4996585127,-1.4579956945,-0.8381159437  
 H,0,-2.7889759757,-2.3012429847,0.5446174828

H,0,-3.2756806066,-3.2075537056,-0.9010873828  
H,0,0.254447795,-3.8706529113,0.8020824359  
H,0,-0.9394640643,-2.7053680777,1.4073147788  
H,0,0.7623174613,-2.2401682418,1.2549016783  
H,0,1.7327364782,-1.6235146004,-1.0155269099  
H,0,0.7972384345,-1.9828239018,-2.4902852968  
H,0,1.4664070151,-3.2957607171,-1.5053775777  
H,0,1.7463183172,3.7993202919,1.5366966907  
H,0,-0.0086521551,4.0154821405,1.2137114528  
H,0,1.1543053078,3.8984857032,-0.1560187856

## mPW1K/6-31+G\*\* (PCM)

Filename: mpBBgasPCMts3 (PCM)

E(RmPW+HF-PW91) = -954.048055898

|                                              |                             |
|----------------------------------------------|-----------------------------|
| Zero-point correction=                       | 0.225993 (Hartree/Particle) |
| Thermal correction to Energy=                | 0.241063                    |
| Thermal correction to Enthalpy=              | 0.242007                    |
| Thermal correction to Gibbs Free Energy=     | 0.182748                    |
| Sum of electronic and zero-point Energies=   | -953.822063                 |
| Sum of electronic and thermal Energies=      | -953.806993                 |
| Sum of electronic and thermal Enthalpies=    | -953.806049                 |
| Sum of electronic and thermal Free Energies= | -953.865307                 |

|       | E (Thermal) | CV             | S              |
|-------|-------------|----------------|----------------|
|       | KCal/Mol    | Cal/Mol-Kelvin | Cal/Mol-Kelvin |
| Total | 151.269     | 52.629         | 124.721        |

C,0,-1.4696444824,-2.0320408714,-1.1599846283  
C,0,-0.2379759161,-2.3249206181,-0.643359173  
O,0,-0.8561408374,-0.227617262,-0.3088080686  
C,0,-0.4166242129,0.7355705226,-1.2204798873  
N,0,-0.6579222863,1.5864819655,-0.1282603569  
S,0,0.6202871139,1.7458658412,0.918356476  
O,0,1.8143330888,1.0599694294,0.4359094494  
O,0,0.1674274226,1.4521478216,2.2670413878  
C,0,-2.7892114047,-2.2127029058,-0.5012698505  
C,0,-0.0129808884,-2.786298569,0.7528367119  
C,0,0.9808968651,-2.2619279915,-1.4995137036  
C,0,0.9028030152,3.4881567137,0.8163307102  
H,0,-1.5038766062,-1.7715393595,-2.2133132269  
H,0,-1.1049110725,0.910215945,-2.0436011893  
H,0,0.6147720539,0.5952820777,-1.5367267067  
H,0,-3.4601018355,-1.4023667216,-0.7769992353  
H,0,-2.7209996427,-2.2414307981,0.581058663  
H,0,-3.2481933903,-3.1435715647,-0.838914454  
H,0,0.2897432814,-3.8350959168,0.7435348036  
H,0,-0.8891324272,-2.6895642468,1.3831342951  
H,0,0.8008171213,-2.2205203842,1.2029637226  
H,0,1.7307131632,-1.6116407195,-1.0498520388  
H,0,0.7632625532,-1.9155373408,-2.5065357715  
H,0,1.4274031508,-3.2551707372,-1.5707733658  
H,0,1.6932111698,3.7195271527,1.5255131085  
H,0,-0.0124736152,4.0039779608,1.0856846383  
H,0,1.2118316189,3.7403685767,-0.1925243099

## mPW1K/6-31+G\*\* (gas phase)

filename: mpBBgasPCMTs3

E(RmPW+HF-PW91) = -954.033662090

|                                              |                             |
|----------------------------------------------|-----------------------------|
| Zero-point correction=                       | 0.226465 (Hartree/Particle) |
| Thermal correction to Energy=                | 0.241491                    |
| Thermal correction to Enthalpy=              | 0.242435                    |
| Thermal correction to Gibbs Free Energy=     | 0.183229                    |
| Sum of electronic and zero-point Energies=   | -953.807197                 |
| Sum of electronic and thermal Energies=      | -953.792171                 |
| Sum of electronic and thermal Enthalpies=    | -953.791227                 |
| Sum of electronic and thermal Free Energies= | -953.850433                 |

|       | E (Thermal) | CV             | S              |
|-------|-------------|----------------|----------------|
|       | KCal/Mol    | Cal/Mol-Kelvin | Cal/Mol-Kelvin |
| Total | 151.538     | 52.496         | 124.611        |

C,0,-1.4583224934,-2.0430998243,-1.1719626385  
C,0,-0.2361382697,-2.255142651,-0.5855751647  
O,0,-0.9217289286,-0.2478451096,-0.375299529  
C,0,-0.5671946393,0.75582441,-1.2930063972  
N,0,-0.6600379814,1.5998101382,-0.1826665594  
S,0,0.7199646909,1.6033210804,0.7482925564  
O,0,1.8491765164,1.0398098233,0.0146457462  
O,0,0.436178432,1.0844856134,2.0701522152  
C,0,-2.7997453772,-2.2560792103,-0.5680439866  
C,0,-0.0581692763,-2.624186407,0.8439645884  
C,0,1.0208372581,-2.1522470549,-1.3789373881  
C,0,0.9740185823,3.3470095614,0.905738104  
H,0,-1.4493994243,-1.8373720996,-2.2360811139  
H,0,-1.3424452659,0.9586371249,-2.0280996363  
H,0,0.4166130659,0.5985454819,-1.7327784661  
H,0,-3.4952737361,-1.501400744,-0.9268831757  
H,0,-2.7824299555,-2.2024318665,0.5147856742  
H,0,-3.1950997164,-3.230577584,-0.8595257091  
H,0,0.4310030933,-3.5968479511,0.9101309863  
H,0,-0.9888882895,-2.6671694731,1.3963302727  
H,0,0.5910528263,-1.8960015413,1.3277120071  
H,0,1.6761020253,-1.3980431889,-0.9422932441  
H,0,0.8342228695,-1.903101266,-2.4203077631  
H,0,1.5546797214,-3.1026677953,-1.3454199065  
H,0,1.8282395176,3.4790902428,1.5630407071  
H,0,0.0845387877,3.7835110465,1.3455336657  
H,0,1.1755589668,3.7697872442,-0.0719978449

## mPW1K/6-31+G\*\* (onsager)

Filename: mpBBonsts3

E(RmPW+HF-PW91) = -954.035816188

|                                              |                             |
|----------------------------------------------|-----------------------------|
| Zero-point correction=                       | 0.226570 (Hartree/Particle) |
| Thermal correction to Energy=                | 0.241575                    |
| Thermal correction to Enthalpy=              | 0.242520                    |
| Thermal correction to Gibbs Free Energy=     | 0.183333                    |
| Sum of electronic and zero-point Energies=   | -953.809246                 |
| Sum of electronic and thermal Energies=      | -953.794241                 |
| Sum of electronic and thermal Enthalpies=    | -953.793297                 |
| Sum of electronic and thermal Free Energies= | -953.852483                 |

|                                               | E (Thermal)<br>KCal/Mol | CV<br>Cal/Mol-Kelvin | S<br>Cal/Mol-Kelvin |
|-----------------------------------------------|-------------------------|----------------------|---------------------|
| Total                                         | 151.591                 | 52.512               | 124.568             |
| C,0,-1.4649886457,-2.0383082998,-1.1736755729 |                         |                      |                     |
| C,0,-0.2339717406,-2.2817584861,-0.6249742165 |                         |                      |                     |
| O,0,-0.8959905812,-0.2492845877,-0.3184290865 |                         |                      |                     |
| C,0,-0.4987248665,0.7463469111,-1.2195346013  |                         |                      |                     |
| N,0,-0.6789265183,1.5835400614,-0.1106054165  |                         |                      |                     |
| S,0,0.6484535331,1.6727903655,0.88362992      |                         |                      |                     |
| O,0,1.8045223899,0.9966956901,0.3074663244    |                         |                      |                     |
| O,0,0.2655360222,1.3524578387,2.2432399028    |                         |                      |                     |
| C,0,-2.7946269047,-2.2530411369,-0.5471611064 |                         |                      |                     |
| C,0,-0.0272845083,-2.7078983691,0.7854205933  |                         |                      |                     |
| C,0,1.0036840617,-2.1898368217,-1.4504191688  |                         |                      |                     |
| C,0,0.9534059387,3.4179106782,0.8224665697    |                         |                      |                     |
| H,0,-1.479756292,-1.7953838957,-2.2297650786  |                         |                      |                     |
| H,0,-1.2268346585,0.9388827478,-2.0034851355  |                         |                      |                     |
| H,0,0.5141121317,0.6040428834,-1.5921163578   |                         |                      |                     |
| H,0,-3.4792350649,-1.4607573627,-0.8398320558 |                         |                      |                     |
| H,0,-2.7493973575,-2.2740933331,0.5361066575  |                         |                      |                     |
| H,0,-3.2212128977,-3.1960681482,-0.8923996757 |                         |                      |                     |
| H,0,0.3074224413,-3.7464936557,0.8049081773   |                         |                      |                     |
| H,0,-0.9205574771,-2.6230440759,1.3924519539  |                         |                      |                     |
| H,0,0.7545556322,-2.1022381358,1.2395200308   |                         |                      |                     |
| H,0,1.7027423164,-1.4837508033,-1.0028933985  |                         |                      |                     |
| H,0,0.7990903022,-1.892717307,-2.4755443457   |                         |                      |                     |
| H,0,1.4994354733,-3.1612333608,-1.4734861536  |                         |                      |                     |
| H,0,1.7754077703,3.6148796301,1.5044474431    |                         |                      |                     |
| H,0,0.0566982788,3.9344892797,1.1452784891    |                         |                      |                     |
| H,0,1.2237572213,3.6994886933,-0.1891656919   |                         |                      |                     |

### B3LYP/6-31G\* (gas phase)

E(RB+HF-LYP) = -954.180726424

|                                              |                             |
|----------------------------------------------|-----------------------------|
| Zero-point correction=                       | 0.220947 (Hartree/Particle) |
| Thermal correction to Energy=                | 0.236352                    |
| Thermal correction to Enthalpy=              | 0.237297                    |
| Thermal correction to Gibbs Free Energy=     | 0.177298                    |
| Sum of electronic and zero-point Energies=   | -953.959780                 |
| Sum of electronic and thermal Energies=      | -953.944374                 |
| Sum of electronic and thermal Enthalpies=    | -953.943430                 |
| Sum of electronic and thermal Free Energies= | -954.003428                 |

|       | E (Thermal)<br>KCAL/MOL | CV<br>CAL/MOL-KELVIN | S<br>CAL/MOL-KELVIN |
|-------|-------------------------|----------------------|---------------------|
| TOTAL | 148.313                 | 53.710               | 126.278             |

Standard orientation:

| Center<br>Number | Atomic<br>Number | Atomic<br>Type |   | Coordinates (Angstroms) |           |           |
|------------------|------------------|----------------|---|-------------------------|-----------|-----------|
|                  |                  |                |   | X                       | Y         | Z         |
| 1                | 6                | 0              | C | -2.581460               | 0.585001  | -0.448706 |
| 2                | 6                | 0              | C | -2.296543               | -0.740626 | -0.165825 |
| 3                | 8                | 0              | O | -0.669640               | 0.672881  | 0.224500  |
| 4                | 6                | 0              | C | 0.138627                | 1.374663  | -0.714499 |
| 5                | 7                | 0              | N | 1.191240                | 1.305888  | 0.222886  |
| 6                | 16               | 0              | S | 2.022385                | -0.179402 | 0.145407  |
| 7                | 8                | 0              | O | 1.664574                | -0.951126 | -1.066351 |
| 8                | 8                | 0              | O | 1.977506                | -0.850177 | 1.450373  |

|    |   |   |   |           |           |           |
|----|---|---|---|-----------|-----------|-----------|
| 9  | 6 | 0 | C | -3.276636 | 1.595425  | 0.411134  |
| 10 | 6 | 0 | C | -2.468479 | -1.346347 | 1.193402  |
| 11 | 6 | 0 | C | -1.768471 | -1.658155 | -1.229358 |
| 12 | 6 | 0 | C | 3.695407  | 0.457461  | -0.096474 |
| 13 | 1 | 0 | H | -2.451825 | 0.882202  | -1.489393 |
| 14 | 1 | 0 | H | -0.193533 | 2.409577  | -0.862392 |
| 15 | 1 | 0 | H | 0.248992  | 0.833136  | -1.661591 |
| 16 | 1 | 0 | H | -2.801581 | 2.574932  | 0.291876  |
| 17 | 1 | 0 | H | -3.257616 | 1.339422  | 1.471617  |
| 18 | 1 | 0 | H | -4.324302 | 1.703024  | 0.097473  |
| 19 | 1 | 0 | H | -3.206382 | -2.159016 | 1.148400  |
| 20 | 1 | 0 | H | -2.789128 | -0.627886 | 1.948443  |
| 21 | 1 | 0 | H | -1.518805 | -1.787230 | 1.518542  |
| 22 | 1 | 0 | H | -0.739864 | -1.957471 | -0.992381 |
| 23 | 1 | 0 | H | -1.765504 | -1.191894 | -2.218489 |
| 24 | 1 | 0 | H | -2.376735 | -2.571390 | -1.275634 |
| 25 | 1 | 0 | H | 4.361904  | -0.407688 | -0.134605 |
| 26 | 1 | 0 | H | 3.950790  | 1.104511  | 0.743660  |
| 27 | 1 | 0 | H | 3.732556  | 1.007823  | -1.038452 |

### MPW1K/6-31+G\* (gas phase)

E(RmpW+HF-PW91) = -954.006577465

|                                              |                             |
|----------------------------------------------|-----------------------------|
| Zero-point correction=                       | 0.227643 (Hartree/Particle) |
| Thermal correction to Energy=                | 0.242616                    |
| Thermal correction to Enthalpy=              | 0.243561                    |
| Thermal correction to Gibbs Free Energy=     | 0.184629                    |
| Sum of electronic and zero-point Energies=   | -953.778934                 |
| Sum of electronic and thermal Energies=      | -953.763961                 |
| Sum of electronic and thermal Enthalpies=    | -953.763017                 |
| Sum of electronic and thermal Free Energies= | -953.821948                 |

|       | E (Thermal) | CV             | S              |
|-------|-------------|----------------|----------------|
|       | KCAL/MOL    | CAL/MOL-KELVIN | CAL/MOL-KELVIN |
| TOTAL | 152.244     | 52.298         | 124.032        |

C,0,-1.4023970111,-2.0217591272,-1.1683400356  
 C,0,-0.1771919187,-2.2445870456,-0.5930514701  
 O,0,-0.8555991996,-0.2320767101,-0.3765780343  
 C,0,-0.4841516712,0.7663617243,-1.2921261424  
 N,0,-0.5996065289,1.616692741,-0.1893700063  
 S,0,0.7624016453,1.6344362259,0.7673597929  
 O,0,1.9067385524,1.0639409367,0.0641417011  
 O,0,0.4525351007,1.1356432278,2.0906623998  
 C,0,-2.7413636337,-2.2242164618,-0.5546051243  
 C,0,0.0121833308,-2.6157806251,0.834835958  
 C,0,1.0732279543,-2.1580105044,-1.3994435167  
 C,0,1.0098631008,3.3819521095,0.9040121362  
 H,0,-1.4025336348,-1.8157406703,-2.2327789119  
 H,0,-1.2451640571,0.9630580835,-2.0434996395  
 H,0,0.5075813762,0.6068475575,-1.712136272  
 H,0,-3.4326460021,-1.4598067231,-0.9033795533  
 H,0,-2.716322113,-2.1784593419,0.5290972759  
 H,0,-3.1497072798,-3.1934660213,-0.8490370085  
 H,0,0.4438777127,-3.6168661083,0.8970543965  
 H,0,-0.9064484731,-2.6009829149,1.4098959879  
 H,0,0.7148579938,-1.9265754097,1.3015954152  
 H,0,1.7473551696,-1.4168418313,-0.9684806759  
 H,0,0.8808541582,-1.9024770973,-2.439172059  
 H,0,1.5934765834,-3.1174186305,-1.3757344675  
 H,0,1.8529290333,3.5280253241,1.5740146778

H,0,0.1126820911,3.8252277862,1.3226140739  
H,0,1.2276102849,3.7938271425,-0.0757192466

## MPW1K/6-31+G\* (Onsager)

E(RmPW+HF-PW91) = -954.008495653

|                                              |                             |
|----------------------------------------------|-----------------------------|
| Zero-point correction=                       | 0.227753 (Hartree/Particle) |
| Thermal correction to Energy=                | 0.242689                    |
| Thermal correction to Enthalpy=              | 0.243633                    |
| Thermal correction to Gibbs Free Energy=     | 0.184741                    |
| Sum of electronic and zero-point Energies=   | -953.780743                 |
| Sum of electronic and thermal Energies=      | -953.765807                 |
| Sum of electronic and thermal Enthalpies=    | -953.764863                 |
| Sum of electronic and thermal Free Energies= | -953.823755                 |

|       | E (Thermal) | CV             | S              |
|-------|-------------|----------------|----------------|
|       | KCAL/MOL    | CAL/MOL-KELVIN | CAL/MOL-KELVIN |
| TOTAL | 152.290     | 52.297         | 123.950        |

C,0,-1.3892963971,-2.0345192647,-1.2110365569  
C,0,-0.1572333407,-2.2819329314,-0.6662988682  
O,0,-0.8180661374,-0.2465990264,-0.37240611  
C,0,-0.4136451189,0.7450614854,-1.2744565337  
N,0,-0.5980331493,1.588635929,-0.1720581473  
S,0,0.7203628747,1.6720195185,0.835028612  
O,0,1.8837412311,1.0077787235,0.2602892337  
O,0,0.3281362413,1.3344869089,2.187494475  
C,0,-2.7183295786,-2.2384421243,-0.5782011673  
C,0,0.0552591439,-2.6970623903,0.7467742252  
C,0,1.077183055,-2.2025992759,-1.4985344675  
C,0,1.0162343539,3.4198041773,0.795501268  
H,0,-1.4087505392,-1.7990117798,-2.269060751  
H,0,-1.1373504338,0.9345032543,-2.0631501543  
H,0,0.6001952558,0.5982635373,-1.6419321841  
H,0,-3.4024390867,-1.447543499,-0.8786461141  
H,0,-2.6712853136,-2.2459983352,0.5058502886  
H,0,-3.1492813892,-3.185314875,-0.9101557452  
H,0,0.3906190225,-3.7362431254,0.7748456878  
H,0,-0.835217883,-2.6076177828,1.3585521389  
H,0,0.8391229675,-2.087938758,1.1946094459  
H,0,1.7864678583,-1.5011712026,-1.0584543121  
H,0,0.8705356654,-1.9064122439,-2.5244956424  
H,0,1.5659687428,-3.1785831167,-1.5221785248  
H,0,1.8327859496,3.6160143619,1.4855112182  
H,0,0.1151748167,3.9304148438,1.1180902819  
H,0,1.2923570322,3.7166840168,-0.2109445812

## Epoxidation TS Isomer 4

### B3LYP/6-31+G\*\* (PCM)

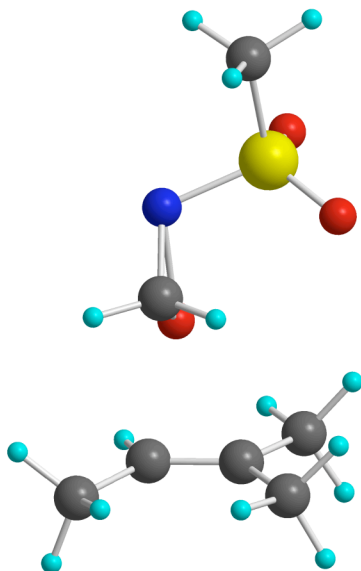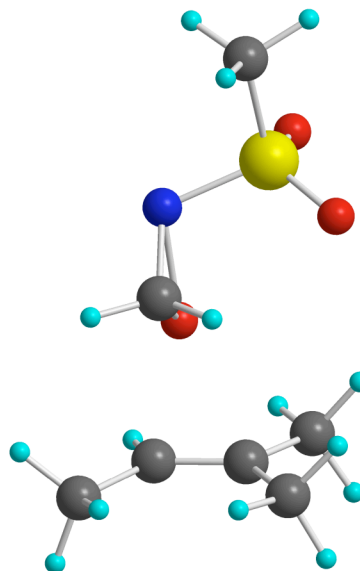

Filename: b3BBgasPCMts4

E(RB+HF-LYP) = -954.240143389

|                                              |                             |
|----------------------------------------------|-----------------------------|
| Zero-point correction=                       | 0.218672 (Hartree/Particle) |
| Thermal correction to Energy=                | 0.234179                    |
| Thermal correction to Enthalpy=              | 0.235124                    |
| Thermal correction to Gibbs Free Energy=     | 0.175155                    |
| Sum of electronic and zero-point Energies=   | -954.021471                 |
| Sum of electronic and thermal Energies=      | -954.005964                 |
| Sum of electronic and thermal Enthalpies=    | -954.005020                 |
| Sum of electronic and thermal Free Energies= | -954.064988                 |

|       | E (Thermal) | CV             | S              |
|-------|-------------|----------------|----------------|
|       | KCal/Mol    | Cal/Mol-Kelvin | Cal/Mol-Kelvin |
| Total | 146.950     | 54.393         | 126.214        |

C,0,2.6764215717,-0.302790058,-0.6468396567  
 C,0,2.3127254885,0.811556606,0.076774785  
 O,0,0.4997681317,-0.4543703974,-0.621962522  
 C,0,-0.0651452356,-1.32251885,0.3401197528  
 N,0,-1.2104212791,-1.2195790508,-0.5034899528  
 S,0,-2.2227490177,0.1111978546,-0.1484075351  
 O,0,-2.3580516921,0.9510799027,-1.3530500859  
 O,0,-1.8603534855,0.7709933968,1.1275484097  
 C,0,3.2311579625,-1.5944510247,-0.1289607524  
 C,0,2.323529078,0.8839593866,1.5769615927  
 C,0,1.9574688507,2.089116836,-0.628778496  
 C,0,-3.7786596277,-0.7672771859,0.0860885745  
 H,0,2.6974297562,-0.1939588911,-1.730646403  
 H,0,-0.1309165151,-0.8881065327,1.3426859636  
 H,0,0.3521685922,-2.3340224824,0.3338205646  
 H,0,2.8003906775,-2.442482706,-0.6724569456  
 H,0,3.0709045762,-1.7469853772,0.9407485004  
 H,0,4.3143144151,-1.6254809066,-0.31051334  
 H,0,3.1125569966,1.5765476375,1.9009428513  
 H,0,2.5011540885,-0.0766349091,2.0629913502  
 H,0,1.3770697751,1.2964943892,1.9445420916  
 H,0,0.9906640858,2.4674756269,-0.2791083338  
 H,0,1.9108379207,1.95949161,-1.7123677424  
 H,0,2.7064826404,2.8600817889,-0.4007880539  
 H,0,-4.5396491189,-0.0012453736,0.2549050196  
 H,0,-3.6897426906,-1.421993208,0.9543016835  
 H,0,-3.9948789451,-1.3348200814,-0.8198993198



## B3LYP/6-31+G\*\* (gas phase)

Filename: b3BBgasPCMTs4 (gas)

E(RB+HF-LYP) = -954.225688536

|                                              |                             |
|----------------------------------------------|-----------------------------|
| Zero-point correction=                       | 0.219055 (Hartree/Particle) |
| Thermal correction to Energy=                | 0.234520                    |
| Thermal correction to Enthalpy=              | 0.235464                    |
| Thermal correction to Gibbs Free Energy=     | 0.175711                    |
| Sum of electronic and zero-point Energies=   | -954.006634                 |
| Sum of electronic and thermal Energies=      | -953.991169                 |
| Sum of electronic and thermal Enthalpies=    | -953.990225                 |
| Sum of electronic and thermal Free Energies= | -954.049977                 |

|       | E (Thermal) | CV             | S              |
|-------|-------------|----------------|----------------|
|       | KCal/Mol    | Cal/Mol-Kelvin | Cal/Mol-Kelvin |
| Total | 147.163     | 54.320         | 125.760        |

C,0,2.7035315681,-0.3300777255,-0.6222471285  
C,0,2.1968045312,0.7883707721,0.0190745177  
O,0,0.6049067689,-0.4988386928,-0.6713387014  
C,0,0.0108261367,-1.4982172037,0.1553611859  
N,0,-1.1943667735,-1.2232522044,-0.5354324772  
S,0,-2.0233202993,0.1285487389,0.1041125827  
O,0,-2.0161755361,1.2463917895,-0.8524483324  
O,0,-1.6130388656,0.3975009854,1.5035570037  
C,0,3.2929653143,-1.558649126,0.0007650914  
C,0,2.055499177,0.9219914004,1.5073941477  
C,0,1.8208326719,2.0042244569,-0.7785901301  
C,0,-3.6911843676,-0.55719894,0.1211893084  
H,0,2.8174329682,-0.2578119556,-1.7008214288  
H,0,0.0533947651,-1.2512255748,1.2224471011  
H,0,0.3737511143,-2.5079106026,-0.0623338375  
H,0,2.966539544,-2.4559075484,-0.5358152207  
H,0,3.0430154291,-1.6754180601,1.0572013513  
H,0,4.3879503607,-1.5261271322,-0.0821481224  
H,0,2.6756409967,1.7571934358,1.8579806083  
H,0,2.3498765677,0.0273523865,2.058000979  
H,0,1.0167354973,1.1644867515,1.760679277  
H,0,0.7928931828,2.3050646312,-0.5521756815  
H,0,1.8968490774,1.8279735199,-1.8535480693  
H,0,2.4796273562,2.8413345783,-0.5110377521  
H,0,-4.3499217894,0.2490965577,0.4503011071  
H,0,-3.7259017173,-1.3956637508,0.8173617768  
H,0,-3.9406866787,-0.8719534874,-0.8923271563

## B3LYP/6-31+G\*\* (onsager)

Filename: b3BBonsts4

E(RB+HF-LYP) = -954.228302223

|                                              |                             |
|----------------------------------------------|-----------------------------|
| Zero-point correction=                       | 0.219204 (Hartree/Particle) |
| Thermal correction to Energy=                | 0.234655                    |
| Thermal correction to Enthalpy=              | 0.235599                    |
| Thermal correction to Gibbs Free Energy=     | 0.175626                    |
| Sum of electronic and zero-point Energies=   | -954.009099                 |
| Sum of electronic and thermal Energies=      | -953.993647                 |
| Sum of electronic and thermal Enthalpies=    | -953.992703                 |
| Sum of electronic and thermal Free Energies= | -954.052676                 |

|                                               | E (Thermal) | CV             | S              |
|-----------------------------------------------|-------------|----------------|----------------|
|                                               | KCal/Mol    | Cal/Mol-Kelvin | Cal/Mol-Kelvin |
| Total                                         | 147.248     | 54.274         | 126.223        |
| C,0,2.6859756649,-0.3139906923,-0.6344025502  |             |                |                |
| C,0,2.2694727686,0.7937214946,0.0774190543    |             |                |                |
| O,0,0.5545967862,-0.4495048102,-0.6518498856  |             |                |                |
| C,0,-0.04571177,-1.3458191361,0.2679109428    |             |                |                |
| N,0,-1.1970931567,-1.204945725,-0.5535641473  |             |                |                |
| S,0,-2.1599223703,0.1464649681,-0.1530550527  |             |                |                |
| O,0,-2.3452492628,0.9965330881,-1.3393674419  |             |                |                |
| O,0,-1.747238513,0.7771280591,1.1209852196    |             |                |                |
| C,0,3.2518049673,-1.5935886814,-0.1006847414  |             |                |                |
| C,0,2.2217624575,0.8654984365,1.576551653     |             |                |                |
| C,0,1.9134206448,2.0635278915,-0.6421063345   |             |                |                |
| C,0,-3.723947474,-0.7140504219,0.1360479417   |             |                |                |
| H,0,2.7425682694,-0.2007032456,-1.71414142    |             |                |                |
| H,0,-0.0953900713,-0.9494148971,1.2877150153  |             |                |                |
| H,0,0.3583197862,-2.3618520057,0.2212367243   |             |                |                |
| H,0,2.8551386105,-2.4498016453,-0.6563794573  |             |                |                |
| H,0,3.0625008445,-1.7492487286,0.9632973164   |             |                |                |
| H,0,4.3401078388,-1.6036337958,-0.2479746725  |             |                |                |
| H,0,2.9572008302,1.6009888961,1.9291139994    |             |                |                |
| H,0,2.4379919876,-0.0835193159,2.0688568479   |             |                |                |
| H,0,1.2376619954,1.2186708408,1.9045729657    |             |                |                |
| H,0,0.9338933652,2.4271923678,-0.3145886078   |             |                |                |
| H,0,1.88770305,1.9261901203,-1.7251949097     |             |                |                |
| H,0,2.6500982858,2.8433354729,-0.4046565149   |             |                |                |
| H,0,-4.467510153,0.0616108708,0.332185158     |             |                |                |
| H,0,-3.6162775776,-1.3717827055,0.9993062238  |             |                |                |
| H,0,-3.9774018044,-1.2777287002,-0.7620703265 |             |                |                |

## mPW1K/6-31+G\*\* (PCM)

Filename: mpBBgasPCMts4

E(RmPW+HF-PW91) = -954.047890663

|                                              |                             |
|----------------------------------------------|-----------------------------|
| Zero-point correction=                       | 0.226238 (Hartree/Particle) |
| Thermal correction to Energy=                | 0.241122                    |
| Thermal correction to Enthalpy=              | 0.242066                    |
| Thermal correction to Gibbs Free Energy=     | 0.183615                    |
| Sum of electronic and zero-point Energies=   | -953.821653                 |
| Sum of electronic and thermal Energies=      | -953.806769                 |
| Sum of electronic and thermal Enthalpies=    | -953.805825                 |
| Sum of electronic and thermal Free Energies= | -953.864276                 |

|       | E (Thermal) | CV             | S              |
|-------|-------------|----------------|----------------|
|       | KCal/Mol    | Cal/Mol-Kelvin | Cal/Mol-Kelvin |
| Total | 151.306     | 52.547         | 123.021        |

```

C,0,2.6346615244,-0.3083831031,-0.6383393953
C,0,2.2361325261,0.781914862,0.0854329423
O,0,0.5429579214,-0.441825777,-0.636448107
C,0,-0.0189646435,-1.3053991179,0.3076257003
N,0,-1.1347131559,-1.1891407902,-0.5398958966
S,0,-2.108054657,0.1164120141,-0.2197873408
O,0,-2.3014382522,0.8738939178,-1.444263922
O,0,-1.6785920521,0.8421472552,0.9708431737
C,0,3.1799923137,-1.5906047204,-0.1210028206
C,0,2.2011045288,0.833640155,1.5735527217
C,0,1.8771720182,2.0513805921,-0.605823949

```

C,0,-3.6310099041,-0.7024434334,0.1489703523  
 H,0,2.690626066,-0.1817208664,-1.7130925519  
 H,0,-0.0895735918,-0.871855145,1.3027591918  
 H,0,0.4013119347,-2.3072313074,0.2979999126  
 H,0,2.7758491734,-2.4303879025,-0.6839169825  
 H,0,2.987027972,-1.7542249095,0.9350060225  
 H,0,4.2613722696,-1.609221557,-0.2665215239  
 H,0,2.9533070663,1.5431672459,1.9229611517  
 H,0,2.3964654661,-0.1209749606,2.050382827  
 H,0,1.2359245878,1.2083788045,1.9119440212  
 H,0,0.8972192147,2.3951328703,-0.2788960788  
 H,0,1.863882178,1.9364510085,-1.6854808209  
 H,0,2.5978422632,2.8287678712,-0.3459282031  
 H,0,-4.3730673734,0.0746828105,0.3121555126  
 H,0,-3.5057164512,-1.3020673166,1.0443298086  
 H,0,-3.9072419432,-1.3192105001,-0.6994037459

## mPW1K/6-31+G\*\* (gas phase)

Filename: mpBBgasPCMts4

E(RmPW+HF-PW91) = -954.032906119

|                                              |                             |
|----------------------------------------------|-----------------------------|
| Zero-point correction=                       | 0.226722 (Hartree/Particle) |
| Thermal correction to Energy=                | 0.241521                    |
| Thermal correction to Enthalpy=              | 0.242465                    |
| Thermal correction to Gibbs Free Energy=     | 0.184565                    |
| Sum of electronic and zero-point Energies=   | -953.806184                 |
| Sum of electronic and thermal Energies=      | -953.791385                 |
| Sum of electronic and thermal Enthalpies=    | -953.790441                 |
| Sum of electronic and thermal Free Energies= | -953.848341                 |

|       | E (Thermal) | CV             | S              |
|-------|-------------|----------------|----------------|
|       | KCal/Mol    | Cal/Mol-Kelvin | Cal/Mol-Kelvin |
| Total | 151.557     | 52.439         | 121.861        |

C,0,2.658124324,-0.329132619,-0.6182625616  
 C,0,2.1500852044,0.7688873138,0.0299171263  
 O,0,0.6061402297,-0.4827319748,-0.6668940213  
 C,0,0.042103169,-1.4703670297,0.1593147453  
 N,0,-1.1315191739,-1.1940124234,-0.5492672185  
 S,0,-1.9408737276,0.1378219716,0.0326062241  
 O,0,-1.9777202162,1.1874750787,-0.9645660532  
 O,0,-1.4834542472,0.4822895929,1.3759937129  
 C,0,3.2317957171,-1.5577067611,-0.0078662391  
 C,0,1.9947102277,0.8808485405,1.506216741  
 C,0,1.7658210779,1.9805234941,-0.7469138181  
 C,0,-3.5727858791,-0.5338899689,0.1561352359  
 H,0,2.7799093071,-0.2416066132,-1.6890002229  
 H,0,0.0718582822,-1.2064041722,1.2157488813  
 H,0,0.4167174839,-2.4694417875,-0.0475504718  
 H,0,2.9193116286,-2.4409770168,-0.5619761635  
 H,0,2.9598879164,-1.6899432602,1.0347347797  
 H,0,4.320926568,-1.5224799445,-0.0651991085  
 H,0,2.5796105563,1.7283090093,1.8651074622  
 H,0,2.3152596875,-0.0031543854,2.0470939003  
 H,0,0.950702254,1.0844116519,1.7463795509  
 H,0,0.737726068,2.2583102763,-0.5221259537  
 H,0,1.8481228063,1.8194014723,-1.8172206137  
 H,0,2.4072188547,2.8170686426,-0.4659742679  
 H,0,-4.2214946376,0.2792583931,0.4677279573  
 H,0,-3.5779555602,-1.3301839509,0.8917778621  
 H,0,-3.8657509212,-0.9012955296,-0.8207754655

## mPW1K/6-31+G\*\* (onsager)

Filename: mpBBonsts4

E(RmPW+HF-PW91) = -954.035584179

|                                              |                             |
|----------------------------------------------|-----------------------------|
| Zero-point correction=                       | 0.226770 (Hartree/Particle) |
| Thermal correction to Energy=                | 0.241609                    |
| Thermal correction to Enthalpy=              | 0.242553                    |
| Thermal correction to Gibbs Free Energy=     | 0.184026                    |
| Sum of electronic and zero-point Energies=   | -953.808814                 |
| Sum of electronic and thermal Energies=      | -953.793975                 |
| Sum of electronic and thermal Enthalpies=    | -953.793031                 |
| Sum of electronic and thermal Free Energies= | -953.851559                 |

|       | E (Thermal) | CV             | S              |
|-------|-------------|----------------|----------------|
|       | KCal/Mol    | Cal/Mol-Kelvin | Cal/Mol-Kelvin |
| Total | 151.612     | 52.439         | 123.182        |

C,0,2.648778929,-0.3188130711,-0.6226289913  
C,0,2.199946434,0.7681087647,0.0802598214  
O,0,0.580269922,-0.4406647715,-0.66874732  
C,0,-0.0055722744,-1.3416685798,0.2282627869  
N,0,-1.1289800139,-1.1714954599,-0.5935321345  
S,0,-2.050940741,0.1517474518,-0.203606779  
O,0,-2.2857755974,0.9507716314,-1.388882826  
O,0,-1.5706035194,0.8168277243,1.0016144037  
C,0,3.1999460148,-1.5880030615,-0.0807019969  
C,0,2.1055664415,0.828548387,1.5651844373  
C,0,1.8402002427,2.025659067,-0.6329545515  
C,0,-3.5802870381,-0.6521390529,0.1960358361  
H,0,2.7396624023,-0.1947984681,-1.6929857515  
H,0,-0.054544462,-0.9576497212,1.2455529308  
H,0,0.3992637415,-2.3478980369,0.1634919304  
H,0,2.8347771343,-2.4379315857,-0.6541768279  
H,0,2.9696439559,-1.751055813,0.9674370452  
H,0,4.2861166015,-1.5874277663,-0.1823757391  
H,0,2.8027901479,1.5805746773,1.9374541561  
H,0,2.3375769881,-0.1098504095,2.0569006608  
H,0,1.1059009055,1.1474037671,1.8578282789  
H,0,0.8475331,2.3551564518,-0.3317078326  
H,0,1.8494835772,1.8971922756,-1.7109220547  
H,0,2.5462986106,2.8142008327,-0.3674316193  
H,0,-4.300690421,0.1334010397,0.4047766983  
H,0,-3.4387560084,-1.2783007018,1.0699932002  
H,0,-3.8931290731,-1.2406185711,-0.6589737616

## B3LYP/6-31G\* (gas phase)

E(RB+HF-LYP) = -954.181279558

|                                              |                             |
|----------------------------------------------|-----------------------------|
| Zero-point correction=                       | 0.220961 (Hartree/Particle) |
| Thermal correction to Energy=                | 0.236239                    |
| Thermal correction to Enthalpy=              | 0.237183                    |
| Thermal correction to Gibbs Free Energy=     | 0.177626                    |
| Sum of electronic and zero-point Energies=   | -953.960318                 |
| Sum of electronic and thermal Energies=      | -953.945041                 |
| Sum of electronic and thermal Enthalpies=    | -953.944097                 |
| Sum of electronic and thermal Free Energies= | -954.003654                 |

|       |             |                |                |
|-------|-------------|----------------|----------------|
|       | E (Thermal) | CV             | S              |
|       | KCAL/MOL    | CAL/MOL-KELVIN | CAL/MOL-KELVIN |
| TOTAL | 148.242     | 53.789         | 125.348        |

Standard orientation:

| Center Number | Atomic Number | Atomic Type |   | Coordinates (Angstroms) |           |           |
|---------------|---------------|-------------|---|-------------------------|-----------|-----------|
|               |               |             |   | X                       | Y         | Z         |
| 1             | 6             | 0           | C | 2.723630                | -0.362510 | -0.584189 |
| 2             | 6             | 0           | C | 2.206344                | 0.782318  | 0.004218  |
| 3             | 8             | 0           | O | 0.665285                | -0.484933 | -0.688017 |
| 4             | 6             | 0           | C | 0.005891                | -1.516247 | 0.054517  |
| 5             | 7             | 0           | N | -1.175742               | -1.171220 | -0.638911 |
| 6             | 16            | 0           | S | -1.997486               | 0.123090  | 0.099147  |
| 7             | 8             | 0           | O | -1.730170               | 1.409116  | -0.567648 |
| 8             | 8             | 0           | O | -1.853944               | 0.063087  | 1.570491  |
| 9             | 6             | 0           | C | 3.300962                | -1.563571 | 0.100259  |
| 10            | 6             | 0           | C | 2.048370                | 0.978944  | 1.483774  |
| 11            | 6             | 0           | C | 1.834839                | 1.960551  | -0.850488 |
| 12            | 6             | 0           | C | -3.677010               | -0.358005 | -0.343980 |
| 13            | 1             | 0           | H | 2.871883                | -0.328729 | -1.660319 |
| 14            | 1             | 0           | H | 0.028246                | -1.353958 | 1.138891  |
| 15            | 1             | 0           | H | 0.352934                | -2.519096 | -0.219353 |
| 16            | 1             | 0           | H | 2.949171                | -2.485493 | -0.376523 |
| 17            | 1             | 0           | H | 3.063901                | -1.614202 | 1.165355  |
| 18            | 1             | 0           | H | 4.395539                | -1.556834 | -0.001062 |
| 19            | 1             | 0           | H | 2.626300                | 1.859154  | 1.796481  |
| 20            | 1             | 0           | H | 2.381263                | 0.127102  | 2.079733  |
| 21            | 1             | 0           | H | 0.998053                | 1.184177  | 1.723524  |
| 22            | 1             | 0           | H | 0.791751                | 2.239505  | -0.666173 |
| 23            | 1             | 0           | H | 1.945608                | 1.741003  | -1.915286 |
| 24            | 1             | 0           | H | 2.468526                | 2.822574  | -0.600424 |
| 25            | 1             | 0           | H | -4.340324               | 0.411733  | 0.057231  |
| 26            | 1             | 0           | H | -3.905142               | -1.331218 | 0.092918  |
| 27            | 1             | 0           | H | -3.745264               | -0.393655 | -1.432228 |

### mPW1K/6-31+G\*\* (gas phase)

E(RmPW+HF-PW91) = -954.005797625

|                                              |                             |
|----------------------------------------------|-----------------------------|
| Zero-point correction=                       | 0.227819 (Hartree/Particle) |
| Thermal correction to Energy=                | 0.242619                    |
| Thermal correction to Enthalpy=              | 0.243564                    |
| Thermal correction to Gibbs Free Energy=     | 0.185440                    |
| Sum of electronic and zero-point Energies=   | -953.777979                 |
| Sum of electronic and thermal Energies=      | -953.763178                 |
| Sum of electronic and thermal Enthalpies=    | -953.762234                 |
| Sum of electronic and thermal Free Energies= | -953.820357                 |

|       |             |                |                |
|-------|-------------|----------------|----------------|
|       | E (Thermal) | CV             | S              |
|       | KCAL/MOL    | CAL/MOL-KELVIN | CAL/MOL-KELVIN |
| TOTAL | 152.246     | 52.267         | 122.331        |

C,0,-1.4152299006,-2.244391407,-0.6886026638  
C,0,-0.0460824983,-2.2097576057,-0.6021471662  
O,0,-0.8883334337,-0.2835204031,-0.3999066043  
C,0,-1.152621734,0.2524081816,0.8718683453  
N,0,-0.8699361871,1.477732944,0.2612002063  
S,0,0.759710825,1.7978898713,0.1681388136  
O,0,1.1843599068,1.8730713641,-1.2140724727  
O,0,1.5157974609,0.9396694128,1.0752052341  
C,0,-2.3824130743,-2.6533369219,0.3648517532

C,0,0.7297800838,-2.4955575535,0.6362289128  
 C,0,0.7705132176,-1.9278326522,-1.816091186  
 C,0,0.7768004403,3.4442759043,0.8181814117  
 H,0,-1.8399455281,-2.0885033092,-1.6708522825  
 H,0,-0.463427971,-0.1079693068,1.6341599079  
 H,0,-2.1969418139,0.1736795166,1.1621805439  
 H,0,-3.2562974475,-2.003182841,0.3538101461  
 H,0,-1.9613354353,-2.6474087055,1.3662291345  
 H,0,-2.7426159876,-3.6642927704,0.1626644076  
 H,0,1.3809197353,-3.3542620643,0.4625450148  
 H,0,0.1104569069,-2.7140627083,1.5006372279  
 H,0,1.3737947163,-1.6465684734,0.8684790087  
 H,0,1.4549989574,-1.1024229428,-1.6259222564  
 H,0,0.1529910579,-1.6663501038,-2.6707123223  
 H,0,1.3695220211,-2.8045751456,-2.0707738902  
 H,0,1.8014078555,3.7993154096,0.7470266105  
 H,0,0.4515716288,3.4272933329,1.8529991026  
 H,0,0.1200107334,4.0603308989,0.2133614848

### mPW1K/6-31+G\*\* (onsager)

E(RmPW+HF-PW91) = -954.008165436

|                                              |                             |
|----------------------------------------------|-----------------------------|
| Zero-point correction=                       | 0.227946 (Hartree/Particle) |
| Thermal correction to Energy=                | 0.242723                    |
| Thermal correction to Enthalpy=              | 0.243668                    |
| Thermal correction to Gibbs Free Energy=     | 0.185443                    |
| Sum of electronic and zero-point Energies=   | -953.780219                 |
| Sum of electronic and thermal Energies=      | -953.765442                 |
| Sum of electronic and thermal Enthalpies=    | -953.764498                 |
| Sum of electronic and thermal Free Energies= | -953.822723                 |

|       | E (Thermal) | CV             | S              |
|-------|-------------|----------------|----------------|
|       | KCAL/MOL    | CAL/MOL-KELVIN | CAL/MOL-KELVIN |
| TOTAL | 152.311     | 52.228         | 122.545        |

C,0,-1.3957302161,-2.28226092,-0.6389462508  
 C,0,-0.031400523,-2.3026276419,-0.514598334  
 O,0,-0.8422529515,-0.31304615,-0.3599620916  
 C,0,-1.0165725014,0.2068072256,0.9281412618  
 N,0,-0.8604191267,1.4377588628,0.2770305077  
 S,0,0.7230336986,1.8867122091,0.0633365917  
 O,0,0.9616046946,2.1988439412,-1.3306218203  
 O,0,1.6423336042,0.9813608383,0.7420401877  
 C,0,-2.4094851039,-2.6505534796,0.384214854  
 C,0,0.6944273885,-2.6261461409,0.7451007646  
 C,0,0.8330987895,-2.061993074,-1.7041525825  
 C,0,0.7210881736,3.4226517196,0.9503866666  
 H,0,-1.7861260768,-2.1098533952,-1.6327487089  
 H,0,-0.2388353586,-0.1069375345,1.6216899986  
 H,0,-2.0223963901,0.0759637778,1.3175694288  
 H,0,-3.2516240175,-1.9605484715,0.3522997976  
 H,0,-2.0190520414,-2.6738591022,1.3975806728  
 H,0,-2.8102621133,-3.6418863339,0.1635120083  
 H,0,1.2554899264,-3.5529061242,0.608422938  
 H,0,0.0447088851,-2.7572856147,1.6045677703  
 H,0,1.4208929174,-1.8440187051,0.9654158075  
 H,0,1.5674710981,-1.288118405,-1.4849091037  
 H,0,0.2556392437,-1.7524584691,-2.570824953  
 H,0,1.3789845011,-2.9740962846,-1.9551500133  
 H,0,1.7080607526,3.8600834603,0.8241625774  
 H,0,0.5238011685,3.2331450103,2.0004269303  
 H,0,-0.0383966083,4.0685336365,0.5228573425

# Epoxidation TS Isomer 5

B3LYP/6-31+G\*\* (PCM)

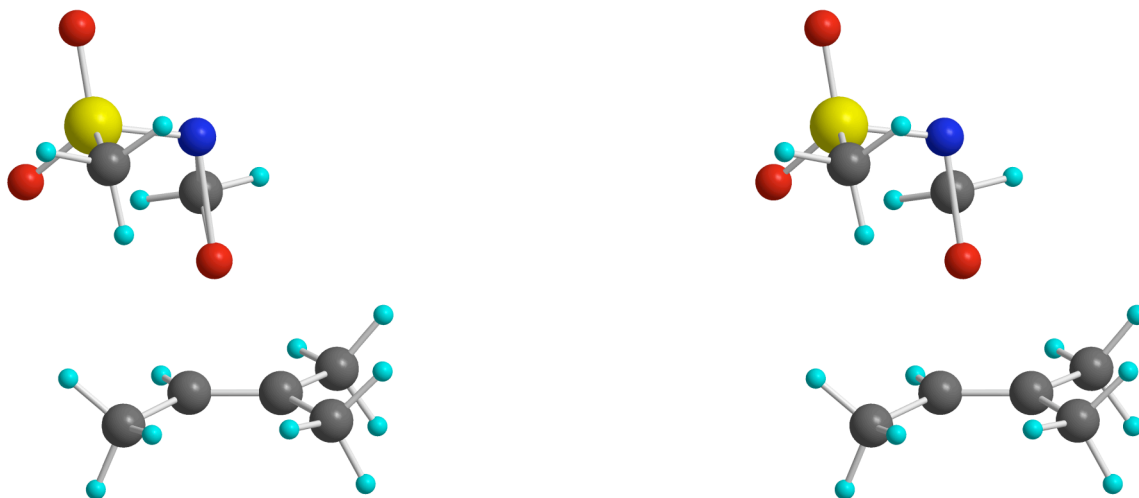

Filename: b3BBgasPCMts5

E(RB+HF-LYP) = -954.242998697

|                                              |                             |
|----------------------------------------------|-----------------------------|
| Zero-point correction=                       | 0.218724 (Hartree/Particle) |
| Thermal correction to Energy=                | 0.234261                    |
| Thermal correction to Enthalpy=              | 0.235205                    |
| Thermal correction to Gibbs Free Energy=     | 0.175171                    |
| Sum of electronic and zero-point Energies=   | -954.024275                 |
| Sum of electronic and thermal Energies=      | -954.008738                 |
| Sum of electronic and thermal Enthalpies=    | -954.007794                 |
| Sum of electronic and thermal Free Energies= | -954.067828                 |

|       | E (Thermal) | CV             | S              |
|-------|-------------|----------------|----------------|
|       | KCal/Mol    | Cal/Mol-Kelvin | Cal/Mol-Kelvin |
| Total | 147.001     | 54.342         | 126.352        |

C,0,0.1108120154,-2.3054608131,0.2337770058  
C,0,1.4871808984,-2.3299871963,0.2997817695  
O,0,0.5853582784,-0.2361418914,-0.1081486489  
C,0,0.3902072652,0.1924042233,-1.4409811288  
N,0,0.3986514147,1.4920979415,-0.8504667037  
S,0,-1.1302607713,2.0439940159,-0.3493607514  
O,0,-2.1993182785,1.029752722,-0.4851120101  
O,0,-1.3193619968,3.3379877992,-1.0427265788  
C,0,-0.8631982324,-2.1787255197,1.3620929244  
C,0,2.2690121541,-2.1144373783,1.5619387702  
C,0,2.3041189586,-2.653965012,-0.9195951607  
C,0,-0.8673172415,2.3767289234,1.3956671488  
H,0,-0.3351625223,-2.5466058134,-0.7323575846  
H,0,-0.5466051242,-0.1635357901,-1.8829728964  
H,0,1.2547943955,0.0394377572,-2.0939448212  
H,0,-1.6669962996,-1.4902721378,1.0810271993  
H,0,-0.4078903809,-1.8220969125,2.2879863146  
H,0,-1.3255623526,-3.1542897396,1.564870034  
H,0,2.7443239018,-3.0574341654,1.8659219454  
H,0,1.6609643463,-1.7573515587,2.3935545031  
H,0,3.0768276416,-1.3947908199,1.3874840657

H,0,3.0418718092,-1.8664165299,-1.1165194872  
H,0,1.6868762022,-2.7931292925,-1.8111563021  
H,0,2.8734075302,-3.5780256218,-0.7504541589  
H,0,-1.7818050172,2.8443130942,1.7675054407  
H,0,-0.0177153421,3.0545515548,1.4879368771  
H,0,-0.6742362522,1.4293041612,1.8979442342

### B3LYP/6-31+G\*\* (gas phase)

Filename: b3BBgasPCMTs5

E(RB+HF-LYP) = -954.227845538

|                                              |                             |
|----------------------------------------------|-----------------------------|
| Zero-point correction=                       | 0.219272 (Hartree/Particle) |
| Thermal correction to Energy=                | 0.234710                    |
| Thermal correction to Enthalpy=              | 0.235654                    |
| Thermal correction to Gibbs Free Energy=     | 0.175914                    |
| Sum of electronic and zero-point Energies=   | -954.008573                 |
| Sum of electronic and thermal Energies=      | -953.993136                 |
| Sum of electronic and thermal Enthalpies=    | -953.992191                 |
| Sum of electronic and thermal Free Energies= | -954.051931                 |

|       | E (Thermal)<br>KCal/Mol | CV<br>Cal/Mol-Kelvin | S<br>Cal/Mol-Kelvin |
|-------|-------------------------|----------------------|---------------------|
| Total | 147.283                 | 54.122               | 125.733             |

C,0,0.131908584,-2.2345190426,0.1912259126  
C,0,1.509866642,-2.3634996096,0.276097853  
O,0,0.6411132347,-0.3210048176,-0.0515762454  
C,0,0.4324508683,0.2171776336,-1.3593354031  
N,0,0.3685179708,1.4937439248,-0.7537876542  
S,0,-1.2019002715,1.9511990518,-0.2922660929  
O,0,-2.1383713364,0.8093895773,-0.2052774299  
O,0,-1.5683596076,3.0947293842,-1.1467186134  
C,0,-0.8590397553,-2.1408329299,1.3086706674  
C,0,2.2777468182,-2.240329006,1.5576354855  
C,0,2.324794059,-2.6829180148,-0.9446584964  
C,0,-0.9017761963,2.5724129074,1.3691052308  
H,0,-0.3073089816,-2.4313041731,-0.7858158789  
H,0,-0.4781260666,-0.1764595583,-1.8269515584  
H,0,1.309008098,0.1188555773,-2.0078025587  
H,0,-1.623523594,-1.4012822506,1.0499016375  
H,0,-0.4056330073,-1.8542931492,2.2594660435  
H,0,-1.3572358617,-3.1097423234,1.445512569  
H,0,2.6955881153,-3.2180734928,1.8362670252  
H,0,1.6718862075,-1.8796531616,2.3887979289  
H,0,3.1252978453,-1.5584303534,1.4265882045  
H,0,3.1061834475,-1.9293499207,-1.1008509884  
H,0,1.714800285,-2.7500791442,-1.8491032222  
H,0,2.8403689761,-3.6434987112,-0.8090898144  
H,0,-1.8461843496,2.9908003358,1.722405814  
H,0,-0.1334648507,3.3434613303,1.3088366672  
H,0,-0.5796302731,1.7414059366,1.9964149172

### B3LYP/6-31+G\*\* (onsager)

Filename: b3BBonsts5

E(RB+HF-LYP) = -954.234256412



|                                              |                             |
|----------------------------------------------|-----------------------------|
| Zero-point correction=                       | 0.219069 (Hartree/Particle) |
| Thermal correction to Energy=                | 0.234629                    |
| Thermal correction to Enthalpy=              | 0.235573                    |
| Thermal correction to Gibbs Free Energy=     | 0.175341                    |
| Sum of electronic and zero-point Energies=   | -954.015187                 |
| Sum of electronic and thermal Energies=      | -953.999627                 |
| Sum of electronic and thermal Enthalpies=    | -953.998683                 |
| Sum of electronic and thermal Free Energies= | -954.058915                 |

|       | E (Thermal)<br>KCal/Mol | CV<br>Cal/Mol-Kelvin | S<br>Cal/Mol-Kelvin |
|-------|-------------------------|----------------------|---------------------|
| Total | 147.232                 | 54.291               | 126.768             |

C,0,0.1230589575,-2.2761485955,0.228550411  
 C,0,1.4989341223,-2.3228592835,0.3100927535  
 O,0,0.5741314673,-0.2238634011,-0.1336967285  
 C,0,0.3518270107,0.1998597304,-1.4625419675  
 N,0,0.3696331505,1.508061536,-0.8967904038  
 S,0,-1.1511755239,2.0542355788,-0.3582019184  
 O,0,-2.2220281868,1.0447879901,-0.4947047933  
 O,0,-1.3460375006,3.3741849497,-0.9915886135  
 C,0,-0.8643554327,-2.1461838386,1.345160717  
 C,0,2.2679406489,-2.1112317014,1.5794000169  
 C,0,2.3238645444,-2.6627214241,-0.8986024558  
 C,0,-0.8413345172,2.324613073,1.3946961281  
 H,0,-0.3113851819,-2.5235813189,-0.7392071301  
 H,0,-0.5943674989,-0.1617692611,-1.8808395861  
 H,0,1.2032846184,0.0371129528,-2.1309013397  
 H,0,-1.6730148146,-1.4708104287,1.0471477268  
 H,0,-0.4190950975,-1.7715925557,2.2687580853  
 H,0,-1.3130592945,-3.1247709621,1.561466978  
 H,0,2.7252300139,-3.0586726348,1.8955168141  
 H,0,1.6553890016,-1.7417432097,2.4018418407  
 H,0,3.0893949702,-1.4059136068,1.4121821421  
 H,0,3.0743512664,-1.8863327739,-1.090116664  
 H,0,1.7153444455,-2.7991967869,-1.7963942091  
 H,0,2.8792840643,-3.5928962628,-0.7205622217  
 H,0,-1.7408003877,2.7874303927,1.8054946575  
 H,0,0.0184422789,2.9884093522,1.4876068144  
 H,0,-0.6444801245,1.35949949,1.8599259462

## mPW1K/6-31+G\*\* (PCM)

Filename: mpBBgasPCMts5

E(RmPW+HF-PW91) = -954.050491961

|                                              |                             |
|----------------------------------------------|-----------------------------|
| Zero-point correction=                       | 0.226284 (Hartree/Particle) |
| Thermal correction to Energy=                | 0.241215                    |
| Thermal correction to Enthalpy=              | 0.242159                    |
| Thermal correction to Gibbs Free Energy=     | 0.183728                    |
| Sum of electronic and zero-point Energies=   | -953.824208                 |
| Sum of electronic and thermal Energies=      | -953.809277                 |
| Sum of electronic and thermal Enthalpies=    | -953.808333                 |
| Sum of electronic and thermal Free Energies= | -953.866764                 |

|       | E (Thermal)<br>KCal/Mol | CV<br>Cal/Mol-Kelvin | S<br>Cal/Mol-Kelvin |
|-------|-------------------------|----------------------|---------------------|
| Total | 151.365                 | 52.521               | 122.980             |

C,0,0.0858908911,-2.2458389567,0.2279766731  
 C,0,1.4524581792,-2.2586880371,0.2955072873  
 O,0,0.5838047492,-0.2642849699,-0.1090109986

C,0,0.4052578401,0.1438320592,-1.433850518  
 N,0,0.4151321632,1.4222941162,-0.8481537414  
 S,0,-1.0670392238,1.9561028724,-0.3353484795  
 O,0,-2.1146928131,0.9559584684,-0.50294184  
 O,0,-1.2732471735,3.2536148687,-0.9649028919  
 C,0,-0.8797516545,-2.0967380866,1.3449762896  
 C,0,2.2247369676,-2.0168836848,1.5439228413  
 C,0,2.2657699367,-2.5949205038,-0.907438387  
 C,0,-0.8120873111,2.2217371491,1.388371377  
 H,0,-0.3541764246,-2.5083505353,-0.72886483  
 H,0,-0.5263893271,-0.2107203488,-1.8706612324  
 H,0,1.2701267291,-0.0233895285,-2.0699526364  
 H,0,-1.665754519,-1.4012893448,1.0556868686  
 H,0,-0.4217348671,-1.741002365,2.2621635451  
 H,0,-1.353322823,-3.056993926,1.5540247085  
 H,0,2.696343582,-2.9475789855,1.8649359225  
 H,0,1.6171337721,-1.6456137637,2.3610784811  
 H,0,3.0250985576,-1.3030929391,1.3553171102  
 H,0,2.9965584685,-1.8122034527,-1.111641544  
 H,0,1.6537179323,-2.7496326296,-1.7920750179  
 H,0,2.8326991941,-3.5087678974,-0.72204711  
 H,0,-1.7210501085,2.6694632282,1.7797363737  
 H,0,0.0289985735,2.8958044999,1.5095382203  
 H,0,-0.6155042911,1.2650886934,1.8573455288

## mpW1K/6-31+G\*\* (gas phase)

Filename: mpBBgasPCMts5

E(RmPW+HF-PW91) = -954.033993454

|                                              |                             |
|----------------------------------------------|-----------------------------|
| Zero-point correction=                       | 0.226828 (Hartree/Particle) |
| Thermal correction to Energy=                | 0.241693                    |
| Thermal correction to Enthalpy=              | 0.242638                    |
| Thermal correction to Gibbs Free Energy=     | 0.184343                    |
| Sum of electronic and zero-point Energies=   | -953.807166                 |
| Sum of electronic and thermal Energies=      | -953.792300                 |
| Sum of electronic and thermal Enthalpies=    | -953.791356                 |
| Sum of electronic and thermal Free Energies= | -953.849650                 |

|       | E (Thermal) | CV             | S              |
|-------|-------------|----------------|----------------|
|       | KCal/Mol    | Cal/Mol-Kelvin | Cal/Mol-Kelvin |
| Total | 151.665     | 52.353         | 122.691        |

C,0,0.0960920267,-2.2128138404,0.1936093736  
 C,0,1.4652167278,-2.2826882169,0.2783591771  
 O,0,0.6249717018,-0.3340297778,-0.0683471735  
 C,0,0.4317872638,0.1584987107,-1.3760650171  
 N,0,0.3955418523,1.4177654696,-0.777569488  
 S,0,-1.1209587135,1.881671132,-0.2898510648  
 O,0,-2.0570260801,0.764699922,-0.2687519311  
 O,0,-1.478327358,3.061417254,-1.0526890807  
 C,0,-0.8890472808,-2.0884666945,1.2960102246  
 C,0,2.2240717375,-2.1012093456,1.5446342932  
 C,0,2.2837592862,-2.6074322999,-0.9240555428  
 C,0,-0.8133121466,2.3848097879,1.3744112879  
 H,0,-0.3340591338,-2.4380681865,-0.7749733249  
 H,0,-0.4845849039,-0.2230260632,-1.8252806226  
 H,0,1.3021661128,0.0278162628,-2.0141715309  
 H,0,-1.6282452207,-1.3362076255,1.0246512668  
 H,0,-0.4359882561,-1.8063970858,2.2406669074  
 H,0,-1.4078579408,-3.0372150218,1.4367139013  
 H,0,2.6733329354,-3.0503036114,1.8429572604

H,0,1.6094298092,-1.7437467472,2.3622104977  
H,0,3.0380290282,-1.3944685612,1.3927943164  
H,0,3.0419363499,-1.8432104289,-1.0933136406  
H,0,1.6798474954,-2.709340435,-1.821549083  
H,0,2.8159576235,-3.5467136661,-0.7649650654  
H,0,-1.7430904172,2.7917900866,1.7594063577  
H,0,-0.0404790417,3.1448605198,1.3616772267  
H,0,-0.5001864573,1.5199144623,1.9471724746

## mpPW1K/6-31+G\*\* (onsager)

Filename: mpBBonsts5  
E(RmpPW+HF-PW91) = -954.039594722

|                                              |                             |
|----------------------------------------------|-----------------------------|
| Zero-point correction=                       | 0.226727 (Hartree/Particle) |
| Thermal correction to Energy=                | 0.241653                    |
| Thermal correction to Enthalpy=              | 0.242597                    |
| Thermal correction to Gibbs Free Energy=     | 0.184108                    |
| Sum of electronic and zero-point Energies=   | -953.812868                 |
| Sum of electronic and thermal Energies=      | -953.797941                 |
| Sum of electronic and thermal Enthalpies=    | -953.796997                 |
| Sum of electronic and thermal Free Energies= | -953.855487                 |

|       | E (Thermal)<br>KCal/Mol | CV<br>Cal/Mol-Kelvin | S<br>Cal/Mol-Kelvin |
|-------|-------------------------|----------------------|---------------------|
| Total | 151.640                 | 52.434               | 123.101             |

C,0,0.0974254632,-2.2186958761,0.2125859998  
C,0,1.4640428506,-2.2552215396,0.300917556  
O,0,0.5835612894,-0.2698348835,-0.1224547507  
C,0,0.3726670496,0.1478209906,-1.441458603  
N,0,0.3828763194,1.4306586968,-0.8765958244  
S,0,-1.0961686826,1.9443564982,-0.3288190534  
O,0,-2.1225642552,0.9179069933,-0.447978053  
O,0,-1.3462040049,3.2379543099,-0.940666198  
C,0,-0.8883494574,-2.073229243,1.3123758706  
C,0,2.2185695311,-2.0240638512,1.5610091198  
C,0,2.2900220414,-2.5996127681,-0.8903016102  
C,0,-0.7764992873,2.2156595141,1.3875130425  
H,0,-0.3270577483,-2.4804852116,-0.7493590534  
H,0,-0.5658350407,-0.2189160189,-1.8545722863  
H,0,1.2247605136,-0.0212444307,-2.0947474238  
H,0,-1.664006816,-1.3707973754,1.011658067  
H,0,-0.4422809876,-1.7250123625,2.2381526317  
H,0,-1.365986535,-3.0333256057,1.5104788529  
H,0,2.6761017593,-2.9592243897,1.8882002138  
H,0,1.601269172,-1.6498346047,2.3690157663  
H,0,3.0286808754,-1.3178822804,1.3879633019  
H,0,3.0341249726,-1.8266867158,-1.0812164798  
H,0,1.6897859333,-2.7446281901,-1.7843453001  
H,0,2.8415719498,-3.5214422868,-0.7005265322  
H,0,-1.6749379954,2.6503545853,1.8144060114  
H,0,0.0598187055,2.9000467949,1.4728909625  
H,0,-0.5464086156,1.2632842506,1.8495617721

## B3LYP/6-31G\* (gas phase)

E(RB+HF-LYP) = -954.182691841

|                               |                             |
|-------------------------------|-----------------------------|
| Zero-point correction=        | 0.221188 (Hartree/Particle) |
| Thermal correction to Energy= | 0.236491                    |

Thermal correction to Enthalpy= 0.237435  
 Thermal correction to Gibbs Free Energy= 0.177442  
 Sum of electronic and zero-point Energies= -953.961503  
 Sum of electronic and thermal Energies= -953.946201  
 Sum of electronic and thermal Enthalpies= -953.945256  
 Sum of electronic and thermal Free Energies= -954.005250

|       | E (Thermal) | CV             | S              |
|-------|-------------|----------------|----------------|
|       | KCAL/MOL    | CAL/MOL-KELVIN | CAL/MOL-KELVIN |
| TOTAL | 148.401     | 53.568         | 126.267        |

Standard orientation:

| Center Number | Atomic Number | Atomic Type | Coordinates (Angstroms) |           |           |           |
|---------------|---------------|-------------|-------------------------|-----------|-----------|-----------|
|               |               |             | X                       | Y         | Z         |           |
| 1             | 6             | 0           | C                       | -1.960999 | 0.585401  | -0.781160 |
| 2             | 6             | 0           | C                       | -2.883078 | -0.092111 | -0.001880 |
| 3             | 8             | 0           | O                       | -0.619763 | -0.249275 | 0.398056  |
| 4             | 6             | 0           | C                       | 0.061087  | -1.346267 | -0.186802 |
| 5             | 7             | 0           | N                       | 1.148107  | -1.030666 | 0.666045  |
| 6             | 16            | 0           | S                       | 2.284823  | -0.020991 | -0.083546 |
| 7             | 8             | 0           | O                       | 1.679249  | 1.020512  | -0.934726 |
| 8             | 8             | 0           | O                       | 3.307829  | -0.894765 | -0.683779 |
| 9             | 6             | 0           | C                       | -1.564695 | 2.027216  | -0.695500 |
| 10            | 6             | 0           | C                       | -3.532618 | 0.493734  | 1.215785  |
| 11            | 6             | 0           | C                       | -3.320306 | -1.481963 | -0.369610 |
| 12            | 6             | 0           | C                       | 2.997723  | 0.764392  | 1.366860  |
| 13            | 1             | 0           | H                       | -1.660150 | 0.093853  | -1.705241 |
| 14            | 1             | 0           | H                       | 0.198980  | -1.231976 | -1.270596 |
| 15            | 1             | 0           | H                       | -0.383773 | -2.317815 | 0.057175  |
| 16            | 1             | 0           | H                       | -0.485914 | 2.105973  | -0.861014 |
| 17            | 1             | 0           | H                       | -1.804401 | 2.479487  | 0.269469  |
| 18            | 1             | 0           | H                       | -2.075894 | 2.601433  | -1.479982 |
| 19            | 1             | 0           | H                       | -4.604181 | 0.653093  | 1.022807  |
| 20            | 1             | 0           | H                       | -3.099046 | 1.447969  | 1.517396  |
| 21            | 1             | 0           | H                       | -3.466552 | -0.200396 | 2.062177  |
| 22            | 1             | 0           | H                       | -3.152383 | -2.179114 | 0.461588  |
| 23            | 1             | 0           | H                       | -2.800413 | -1.862340 | -1.253344 |
| 24            | 1             | 0           | H                       | -4.400196 | -1.499412 | -0.575682 |
| 25            | 1             | 0           | H                       | 3.798048  | 1.417423  | 1.011924  |
| 26            | 1             | 0           | H                       | 3.397117  | -0.012703 | 2.019952  |
| 27            | 1             | 0           | H                       | 2.223635  | 1.340851  | 1.875212  |

### B3LYP/6-31G\* (Onsager)

E(RB+HF-LYP) = -954.188848791

Zero-point correction= 0.221157 (Hartree/Particle)  
 Thermal correction to Energy= 0.236431  
 Thermal correction to Enthalpy= 0.237375  
 Thermal correction to Gibbs Free Energy= 0.178220  
 Sum of electronic and zero-point Energies= -953.967691  
 Sum of electronic and thermal Energies= -953.952418  
 Sum of electronic and thermal Enthalpies= -953.951474  
 Sum of electronic and thermal Free Energies= -954.010629

|       | E (Thermal) | CV             | S              |
|-------|-------------|----------------|----------------|
|       | KCAL/MOL    | CAL/MOL-KELVIN | CAL/MOL-KELVIN |
| TOTAL | 148.363     | 53.662         | 124.502        |

|   |   |   |   |           |          |           |
|---|---|---|---|-----------|----------|-----------|
| 1 | 6 | 0 | C | -2.038785 | 0.563913 | -0.882810 |
|---|---|---|---|-----------|----------|-----------|

|    |    |   |   |           |           |           |
|----|----|---|---|-----------|-----------|-----------|
| 2  | 6  | 0 | C | -2.811827 | -0.070151 | 0.070358  |
| 3  | 8  | 0 | O | -0.561826 | -0.348965 | 0.223142  |
| 4  | 6  | 0 | C | 0.098264  | -1.404796 | -0.451084 |
| 5  | 7  | 0 | N | 1.153138  | -1.198548 | 0.477747  |
| 6  | 16 | 0 | S | 2.283660  | -0.038804 | -0.023227 |
| 7  | 8  | 0 | O | 1.890318  | 0.677629  | -1.253116 |
| 8  | 8  | 0 | O | 3.596996  | -0.706010 | 0.009697  |
| 9  | 6  | 0 | C | -1.549510 | 1.977730  | -0.893352 |
| 10 | 6  | 0 | C | -3.181531 | 0.543002  | 1.387357  |
| 11 | 6  | 0 | C | -3.381886 | -1.434090 | -0.195907 |
| 12 | 6  | 0 | C | 2.220502  | 1.124325  | 1.349903  |
| 13 | 1  | 0 | H | -1.909870 | 0.034258  | -1.826034 |
| 14 | 1  | 0 | H | 0.292219  | -1.183288 | -1.507079 |
| 15 | 1  | 0 | H | -0.377437 | -2.381938 | -0.312211 |
| 16 | 1  | 0 | H | -0.507658 | 1.997947  | -1.231377 |
| 17 | 1  | 0 | H | -1.608415 | 2.458625  | 0.085725  |
| 18 | 1  | 0 | H | -2.144259 | 2.573750  | -1.598864 |
| 19 | 1  | 0 | H | -4.262964 | 0.736811  | 1.417554  |
| 20 | 1  | 0 | H | -2.663979 | 1.481932  | 1.588367  |
| 21 | 1  | 0 | H | -2.963366 | -0.154846 | 2.204172  |
| 22 | 1  | 0 | H | -3.095100 | -2.138917 | 0.594508  |
| 23 | 1  | 0 | H | -3.065424 | -1.838639 | -1.161640 |
| 24 | 1  | 0 | H | -4.479735 | -1.389820 | -0.189472 |
| 25 | 1  | 0 | H | 3.000643  | 1.869789  | 1.178511  |
| 26 | 1  | 0 | H | 2.405715  | 0.576546  | 2.274941  |
| 27 | 1  | 0 | H | 1.233832  | 1.587656  | 1.365740  |

## HF/6-31G\* (gas phase)

E(RHF) = -950.073474341

|                                              |                             |
|----------------------------------------------|-----------------------------|
| Zero-point correction=                       | 0.237797 (Hartree/Particle) |
| Thermal correction to Energy=                | 0.252040                    |
| Thermal correction to Enthalpy=              | 0.252984                    |
| Thermal correction to Gibbs Free Energy=     | 0.196042                    |
| Sum of electronic and zero-point Energies=   | -949.835677                 |
| Sum of electronic and thermal Energies=      | -949.821434                 |
| Sum of electronic and thermal Enthalpies=    | -949.820490                 |
| Sum of electronic and thermal Free Energies= | -949.877432                 |

|       | E (Thermal) | CV             | S              |
|-------|-------------|----------------|----------------|
|       | KCAL/MOL    | CAL/MOL-KELVIN | CAL/MOL-KELVIN |
| TOTAL | 158.158     | 50.161         | 119.844        |

Standard orientation:

| Center Number | Atomic Number | Atomic Type | Coordinates (Angstroms) |           |           |
|---------------|---------------|-------------|-------------------------|-----------|-----------|
|               |               |             | X                       | Y         | Z         |
| 1             | 6             | 0           | -1.982067               | 0.649585  | -0.853506 |
| 2             | 6             | 0           | -2.723884               | -0.085141 | 0.025062  |
| 3             | 8             | 0           | -0.617693               | -0.250602 | 0.281346  |
| 4             | 6             | 0           | 0.066399                | -1.410792 | -0.232488 |
| 5             | 7             | 0           | 1.099499                | -1.063986 | 0.605220  |
| 6             | 16            | 0           | 2.230522                | -0.073611 | -0.047774 |
| 7             | 8             | 0           | 1.736634                | 0.580999  | -1.237159 |
| 8             | 8             | 0           | 3.471696                | -0.788134 | -0.151230 |
| 9             | 6             | 0           | -1.540372               | 2.076264  | -0.737192 |
| 10            | 6             | 0           | -3.179292               | 0.404801  | 1.370256  |
| 11            | 6             | 0           | -3.248016               | -1.440600 | -0.369304 |
| 12            | 6             | 0           | 2.425756                | 1.149581  | 1.212994  |
| 13            | 1             | 0           | -1.792923               | 0.205081  | -1.815143 |
| 14            | 1             | 0           | 0.197787                | -1.330744 | -1.300040 |

|    |   |   |           |           |           |
|----|---|---|-----------|-----------|-----------|
| 15 | 1 | 0 | -0.436269 | -2.316346 | 0.065977  |
| 16 | 1 | 0 | -0.507978 | 2.150863  | -1.055382 |
| 17 | 1 | 0 | -1.623408 | 2.463552  | 0.268209  |
| 18 | 1 | 0 | -2.143139 | 2.698836  | -1.393257 |
| 19 | 1 | 0 | -4.251381 | 0.586104  | 1.345521  |
| 20 | 1 | 0 | -2.686709 | 1.313500  | 1.679228  |
| 21 | 1 | 0 | -2.994819 | -0.354391 | 2.122023  |
| 22 | 1 | 0 | -3.011100 | -2.183730 | 0.384805  |
| 23 | 1 | 0 | -2.856175 | -1.771653 | -1.322865 |
| 24 | 1 | 0 | -4.331764 | -1.400100 | -0.446507 |
| 25 | 1 | 0 | 3.213667  | 1.816900  | 0.890166  |
| 26 | 1 | 0 | 2.705200  | 0.659072  | 2.133604  |
| 27 | 1 | 0 | 1.497916  | 1.688448  | 1.332913  |

## BP86/6-31G\* (gas phase)

E(RB-P86) = -954.232449721

|                                              |                             |
|----------------------------------------------|-----------------------------|
| Zero-point correction=                       | 0.214083 (Hartree/Particle) |
| Thermal correction to Energy=                | 0.229789                    |
| Thermal correction to Enthalpy=              | 0.230733                    |
| Thermal correction to Gibbs Free Energy=     | 0.170236                    |
| Sum of electronic and zero-point Energies=   | -954.018366                 |
| Sum of electronic and thermal Energies=      | -954.002660                 |
| Sum of electronic and thermal Enthalpies=    | -954.001716                 |
| Sum of electronic and thermal Free Energies= | -954.062214                 |

|       | E (Thermal)<br>KCAL/MOL | CV<br>CAL/MOL-KELVIN | S<br>CAL/MOL-KELVIN |
|-------|-------------------------|----------------------|---------------------|
| TOTAL | 144.195                 | 55.177               | 127.328             |

Standard orientation:

| Center<br>Number | Atomic<br>Number | Atomic<br>Type | Coordinates (Angstroms) |           |           |
|------------------|------------------|----------------|-------------------------|-----------|-----------|
|                  |                  |                | X                       | Y         | Z         |
| 1                | 6                | 0              | -1.968122               | 0.571492  | -0.836760 |
| 2                | 6                | 0              | -2.870049               | -0.067606 | 0.008702  |
| 3                | 8                | 0              | -0.582914               | -0.300166 | 0.354820  |
| 4                | 6                | 0              | 0.075635                | -1.423247 | -0.213835 |
| 5                | 7                | 0              | 1.148087                | -1.093317 | 0.681311  |
| 6                | 16               | 0              | 2.295466                | -0.045687 | -0.064412 |
| 7                | 8                | 0              | 1.764806                | 0.699674  | -1.241782 |
| 8                | 8                | 0              | 3.525469                | -0.867059 | -0.225823 |
| 9                | 6                | 0              | -1.506122               | 1.997971  | -0.785465 |
| 10               | 6                | 0              | -3.401529               | 0.545011  | 1.274589  |
| 11               | 6                | 0              | -3.393132               | -1.439011 | -0.330188 |
| 12               | 6                | 0              | 2.567627                | 1.137362  | 1.278912  |
| 13               | 1                | 0              | -1.726805               | 0.047591  | -1.772521 |
| 14               | 1                | 0              | 0.254741                | -1.322944 | -1.302608 |
| 15               | 1                | 0              | -0.382248               | -2.397232 | 0.042586  |
| 16               | 1                | 0              | -0.436228               | 2.039279  | -1.053679 |
| 17               | 1                | 0              | -1.640576               | 2.458474  | 0.206563  |
| 18               | 1                | 0              | -2.065972               | 2.606248  | -1.522768 |
| 19               | 1                | 0              | -4.483440               | 0.764175  | 1.168442  |
| 20               | 1                | 0              | -2.890862               | 1.479998  | 1.548902  |
| 21               | 1                | 0              | -3.305503               | -0.162941 | 2.118240  |
| 22               | 1                | 0              | -3.187849               | -2.157971 | 0.485772  |
| 23               | 1                | 0              | -2.960877               | -1.835289 | -1.264257 |
| 24               | 1                | 0              | -4.495120               | -1.412421 | -0.448889 |
| 25               | 1                | 0              | 3.375551                | 1.811748  | 0.954993  |
| 26               | 1                | 0              | 2.862211                | 0.580529  | 2.180132  |

### MPW1K/6-31+G\* (gas phase)

E(RmPW+HF-PW91) = -954.006944332

|                                              |                             |
|----------------------------------------------|-----------------------------|
| Zero-point correction=                       | 0.227969 (Hartree/Particle) |
| Thermal correction to Energy=                | 0.242801                    |
| Thermal correction to Enthalpy=              | 0.243745                    |
| Thermal correction to Gibbs Free Energy=     | 0.185520                    |
| Sum of electronic and zero-point Energies=   | -953.778975                 |
| Sum of electronic and thermal Energies=      | -953.764143                 |
| Sum of electronic and thermal Enthalpies=    | -953.763199                 |
| Sum of electronic and thermal Free Energies= | -953.821424                 |

|       | E (Thermal)<br>KCAL/MOL | CV<br>CAL/MOL-KELVIN | S<br>CAL/MOL-KELVIN |
|-------|-------------------------|----------------------|---------------------|
| TOTAL | 152.360                 | 52.162               | 122.545             |

C,0,0.094803248,-2.2105402933,0.1977319831  
 C,0,1.463745754,-2.2861068245,0.2775874953  
 O,0,0.6212287647,-0.3330134284,-0.0615588268  
 C,0,0.4412794812,0.1605290005,-1.3696887539  
 N,0,0.4002017734,1.4191818076,-0.7706661233  
 S,0,-1.1198975917,1.8866921505,-0.2978975553  
 O,0,-2.0598573026,0.7734831778,-0.2866055683  
 O,0,-1.4648693255,3.0688388642,-1.0624799149  
 C,0,-0.8861416696,-2.0894449586,1.3051345371  
 C,0,2.229551829,-2.1096183169,1.5407229168  
 C,0,2.2773121594,-2.6077820334,-0.9293990036  
 C,0,-0.8259985995,2.3872558432,1.3705661231  
 H,0,-0.3412149197,-2.4322365353,-0.7692964313  
 H,0,-0.4697456594,-0.2207479697,-1.8293475709  
 H,0,1.3181864825,0.0294445398,-1.9985148655  
 H,0,-1.6401191262,-1.3520961967,1.0325813939  
 H,0,-0.4324094708,-1.7901291041,2.2449948815  
 H,0,-1.3899509149,-3.0452233116,1.4599828906  
 H,0,2.6814265103,-3.0600479289,1.8342019514  
 H,0,1.6203108327,-1.755219261,2.3646564306  
 H,0,3.0436154288,-1.4018071466,1.3883195681  
 H,0,3.0352464454,-1.8427496287,-1.1015127109  
 H,0,1.6699477789,-2.707725203,-1.8258888694  
 H,0,2.8115482404,-3.5479443175,-0.7763602012  
 H,0,-1.7577934611,2.7973440174,1.7497291946  
 H,0,-0.0505593162,3.1457943351,1.3686090031  
 H,0,-0.5208701037,1.5217732392,1.9480917757

### MPW1K/6-31+G\* (Onsager)

E(RmPW+HF-PW91) = -954.013090273

|                                              |                             |
|----------------------------------------------|-----------------------------|
| Zero-point correction=                       | 0.227852 (Hartree/Particle) |
| Thermal correction to Energy=                | 0.242746                    |
| Thermal correction to Enthalpy=              | 0.243690                    |
| Thermal correction to Gibbs Free Energy=     | 0.185301                    |
| Sum of electronic and zero-point Energies=   | -953.785238                 |
| Sum of electronic and thermal Energies=      | -953.770344                 |
| Sum of electronic and thermal Enthalpies=    | -953.769400                 |
| Sum of electronic and thermal Free Energies= | -953.827790                 |

|       | E (Thermal) | CV             | S              |
|-------|-------------|----------------|----------------|
|       | KCAL/MOL    | CAL/MOL-KELVIN | CAL/MOL-KELVIN |
| TOTAL | 152.325     | 52.254         | 122.891        |

```

C,0,0.0919871522,-2.2584282026,0.2359217998
C,0,1.4583222077,-2.2946141877,0.3192702559
O,0,0.5713237483,-0.3011744846,-0.1016027724
C,0,0.3709976379,0.1116020504,-1.4216586243
N,0,0.3833716912,1.3951811815,-0.8572893151
S,0,-1.0956216478,1.9207446945,-0.3211589094
O,0,-2.133675648,0.9092807852,-0.4596473023
O,0,-1.3221686733,3.2227370524,-0.9247322738
C,0,-0.8896046423,-2.1160335607,1.3407084288
C,0,2.2191642621,-2.0638174698,1.5760042597
C,0,2.2805630677,-2.6357469456,-0.8758718723
C,0,-0.7917493485,2.1753916029,1.4015695543
H,0,-0.3377729555,-2.5195289861,-0.7241934765
H,0,-0.5655845765,-0.2519085635,-1.8412256463
H,0,1.2270137831,-0.0619369941,-2.06838277
H,0,-1.6810278797,-1.4311102413,1.0390352396
H,0,-0.4441759599,-1.7489385966,2.2603386867
H,0,-1.350122638,-3.0822142843,1.554583267
H,0,2.6800516152,-2.9990194264,1.9013113426
H,0,1.6066631034,-1.6907449801,2.3892365274
H,0,3.0288237961,-1.3564022702,1.4005445857
H,0,3.0214793469,-1.8596871647,-1.0713019592
H,0,1.6773759936,-2.7832991888,-1.7686474873
H,0,2.837714394,-3.5559903574,-0.6900087119
H,0,-1.6881752203,2.6215292567,1.8230846684
H,0,0.0541301999,2.8467146725,1.5040777867
H,0,-0.5819659131,1.2174871961,1.8633116778

```

## Epoxidation TS Isomer 6

B3LYP/6-31+G\*\* (PCM)

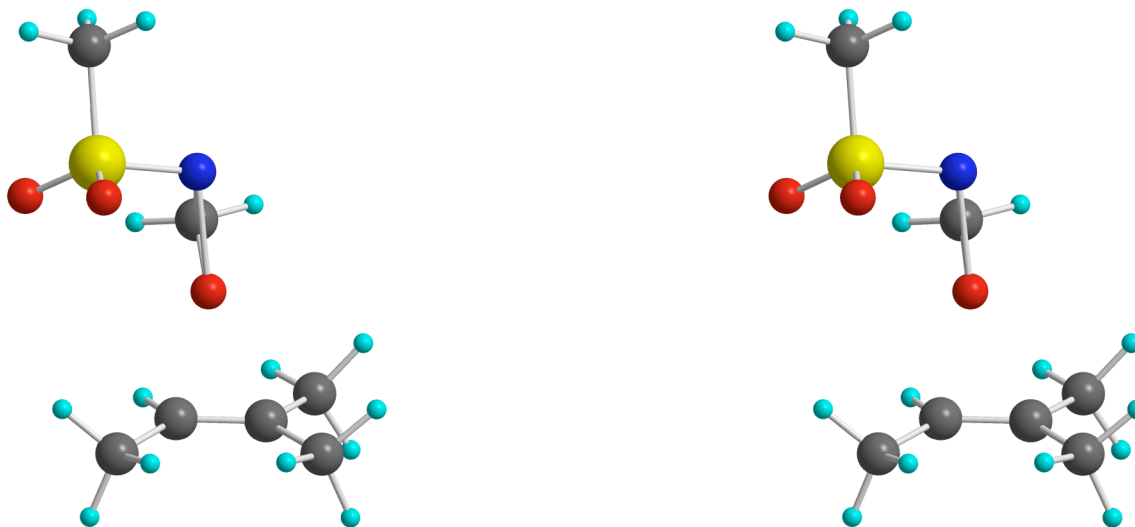

Filename: b3BBgasPCMTs6 (PCM)

E(RB+HF-LYP) = -954.240463788

Zero-point correction=

Thermal correction to Energy=

0.218506 (Hartree/Particle)

0.234125



Thermal correction to Enthalpy= 0.235069  
 Thermal correction to Gibbs Free Energy= 0.174589  
 Sum of electronic and zero-point Energies= -954.021958  
 Sum of electronic and thermal Energies= -954.006339  
 Sum of electronic and thermal Enthalpies= -954.005395  
 Sum of electronic and thermal Free Energies= -954.065875

|       | E (Thermal) | CV             | S              |
|-------|-------------|----------------|----------------|
|       | KCal/Mol    | Cal/Mol-Kelvin | Cal/Mol-Kelvin |
| Total | 146.915     | 54.434         | 127.290        |

C,0,0.6398449124,-2.2670126429,-0.2721608932  
 C,0,1.9804781418,-1.9909381082,-0.1282854494  
 O,0,0.605195674,-0.1100532856,-0.0064619684  
 C,0,0.3909080899,0.6309895408,-1.1898166179  
 N,0,0.0407687076,1.6513502233,-0.2576619711  
 S,0,-1.597416172,1.6226616076,0.2329043102  
 O,0,-1.6560779127,1.5334055303,1.7033366229  
 O,0,-2.4109133922,0.6723732809,-0.5600427705  
 C,0,-0.3282307175,-2.6851328678,0.7901589614  
 C,0,2.6910988556,-1.9638798116,1.1934410562  
 C,0,2.84903635,-1.7722295393,-1.3363017095  
 C,0,-2.0636822209,3.2988943139,-0.2369952001  
 H,0,0.2600814457,-2.3267843531,-1.2934172198  
 H,0,-0.4015239256,0.2241022576,-1.8271380861  
 H,0,1.3041581492,0.8790492155,-1.7395460224  
 H,0,-1.2941712807,-2.1968931676,0.6303524693  
 H,0,0.011998474,-2.4485032563,1.7997846557  
 H,0,-0.4964259418,-3.7694873927,0.7319979174  
 H,0,3.3418871632,-2.8453546378,1.2800890433  
 H,0,2.0126444475,-1.9564197714,2.0468408893  
 H,0,3.3395238309,-1.0831166464,1.2586629779  
 H,0,3.3861577412,-0.8182955552,-1.2660979374  
 H,0,2.2777910632,-1.7914162011,-2.2682788255  
 H,0,3.6161740033,-2.5567166133,-1.3898097648  
 H,0,-3.0973644589,3.4323444509,0.0918392573  
 H,0,-1.9871721515,3.3979730205,-1.3208607084  
 H,0,-1.4011818758,3.9983014091,0.2744139834

### B3LYP/6-31+G\*\* (gas phase)

Filename: b3BBgasPCMTs6 (gas)

E(RB+HF-LYP) = -954.226181066

Zero-point correction= 0.219050 (Hartree/Particle)  
 Thermal correction to Energy= 0.234576  
 Thermal correction to Enthalpy= 0.235520  
 Thermal correction to Gibbs Free Energy= 0.175268  
 Sum of electronic and zero-point Energies= -954.007131  
 Sum of electronic and thermal Energies= -953.991605  
 Sum of electronic and thermal Enthalpies= -953.990661  
 Sum of electronic and thermal Free Energies= -954.050913

|       | E (Thermal) | CV             | S              |
|-------|-------------|----------------|----------------|
|       | KCal/Mol    | Cal/Mol-Kelvin | Cal/Mol-Kelvin |
| Total | 147.199     | 54.247         | 126.813        |

C,0,0.6235330199,-2.1735661367,-0.2821284312  
 C,0,1.982066789,-1.9693288856,-0.1254848462  
 O,0,0.6980173822,-0.1312872258,-0.081814653  
 C,0,0.4263674608,0.63356962,-1.2529415136  
 N,0,0.0636242624,1.6671049282,-0.3571243736

S,0,-1.5455716066,1.5295134544,0.2144191882  
O,0,-1.5454825657,1.3645723418,1.6743673296  
O,0,-2.3401691959,0.5938057819,-0.6134594163  
C,0,-0.3815788523,-2.5252152502,0.7696981827  
C,0,2.6665959764,-1.9308184281,1.2086492406  
C,0,2.877809501,-1.834211614,-1.3251703607  
C,0,-2.1027002195,3.2094839329,-0.1405115069  
H,0,0.2638480594,-2.2545943239,-1.3073867471  
H,0,-0.3636757533,0.1918167567,-1.8717550988  
H,0,1.3250610258,0.8909675024,-1.8235261931  
H,0,-1.3246583453,-2.0100442,0.5671765346  
H,0,-0.0578518346,-2.2543485508,1.7754953071  
H,0,-0.5785898034,-3.6058908668,0.7482481633  
H,0,3.259273285,-2.8459585531,1.3487268518  
H,0,1.970321985,-1.8427099605,2.0423625745  
H,0,3.3637168669,-1.087355724,1.2527625993  
H,0,3.4524153452,-0.901235503,-1.2804375525  
H,0,2.3211925241,-1.8618475,-2.2656531433  
H,0,3.6111275011,-2.6519969508,-1.3393105966  
H,0,-3.118918334,3.2820472322,0.2527759587  
H,0,-2.0931283705,3.3705202612,-1.2189620072  
H,0,-1.4390591031,3.9062188618,0.3719315097

### B3LYP/6-31+G\*\* (Onsager)

b3BBonsts6

E(RB+HF-LYP) = -954.228987424

|                                              |                             |
|----------------------------------------------|-----------------------------|
| Zero-point correction=                       | 0.218981 (Hartree/Particle) |
| Thermal correction to Energy=                | 0.234575                    |
| Thermal correction to Enthalpy=              | 0.235520                    |
| Thermal correction to Gibbs Free Energy=     | 0.174923                    |
| Sum of electronic and zero-point Energies=   | -954.010007                 |
| Sum of electronic and thermal Energies=      | -953.994412                 |
| Sum of electronic and thermal Enthalpies=    | -953.993468                 |
| Sum of electronic and thermal Free Energies= | -954.054065                 |

|       | E (Thermal)<br>KCal/Mol | CV<br>Cal/Mol-Kelvin | S<br>Cal/Mol-Kelvin |
|-------|-------------------------|----------------------|---------------------|
| Total | 147.198                 | 54.331               | 127.537             |

C,0,0.6347865109,-2.2251905115,-0.2742281536  
C,0,1.9857332411,-1.9862061092,-0.133800452  
O,0,0.6278336261,-0.1306129363,-0.0048227781  
C,0,0.4026474982,0.6375155738,-1.1726166409  
N,0,0.0417721532,1.6532486459,-0.2462912111  
S,0,-1.593600932,1.5886069461,0.2469622791  
O,0,-1.6666827204,1.5201023269,1.7140156946  
O,0,-2.3909353928,0.6362013892,-0.5565915418  
C,0,-0.3436581192,-2.6284665966,0.7850374824  
C,0,2.6951837404,-1.9702265331,1.1880174409  
C,0,2.8563914528,-1.7890240996,-1.3430591013  
C,0,-2.0762670038,3.2629420798,-0.2365609197  
H,0,0.2572233592,-2.2813535441,-1.2945454693  
H,0,-0.3845600984,0.2272035903,-1.8153438164  
H,0,1.3157507102,0.8938556438,-1.7190714954  
H,0,-1.2987793742,-2.1216032654,0.6201645635  
H,0,-0.0016258769,-2.390186462,1.7934246303  
H,0,-0.5256302549,-3.7105325145,0.7301175628  
H,0,3.3286776772,-2.8635264667,1.2782416769  
H,0,2.0144458245,-1.944930202,2.0388752243  
H,0,3.3593401334,-1.1016837733,1.2512831268  
H,0,3.4130778798,-0.8465498367,-1.2764435241

H,0,2.2855698643,-1.7994501838,-2.2750398104  
H,0,3.6075776377,-2.5881711868,-1.3972859523  
H,0,-3.1090853739,3.3902942264,0.0952389016  
H,0,-2.0054384474,3.3568534234,-1.3208200315  
H,0,-1.4161607151,3.9701003759,0.2660893146

### mPW1K/6-31+G\*\* (PCM)

Filename: mpBBgasPCMts6

E(RmPW+HF-PW91) = -954.048261701

|                                              |                             |
|----------------------------------------------|-----------------------------|
| Zero-point correction=                       | 0.226045 (Hartree/Particle) |
| Thermal correction to Energy=                | 0.241079                    |
| Thermal correction to Enthalpy=              | 0.242023                    |
| Thermal correction to Gibbs Free Energy=     | 0.182983                    |
| Sum of electronic and zero-point Energies=   | -953.822217                 |
| Sum of electronic and thermal Energies=      | -953.807182                 |
| Sum of electronic and thermal Enthalpies=    | -953.806238                 |
| Sum of electronic and thermal Free Energies= | -953.865279                 |

|       | E (Thermal) | CV             | S              |
|-------|-------------|----------------|----------------|
|       | KCal/Mol    | Cal/Mol-Kelvin | Cal/Mol-Kelvin |
| Total | 151.279     | 52.606         | 124.262        |

C,0,0.6054638376,-2.2104448343,-0.293192748  
C,0,1.9362254208,-1.9378424686,-0.1388571494  
O,0,0.6244118264,-0.1493433824,-0.0030500281  
C,0,0.4172712582,0.5955334411,-1.1663288607  
N,0,0.0882964263,1.5891723269,-0.228965875  
S,0,-1.4933269245,1.5675853522,0.2744720344  
O,0,-1.5276906609,1.5418741861,1.7263537666  
O,0,-2.2867512961,0.5772531126,-0.4448873293  
C,0,-0.3625576494,-2.6197340844,0.7556168556  
C,0,2.6295763245,-1.9137246654,1.1777663289  
C,0,2.8070475442,-1.7184989978,-1.3291252899  
C,0,-2.012360533,3.175754153,-0.2456169312  
H,0,0.2371538883,-2.2697696373,-1.3126364019  
H,0,-0.3790208442,0.2004534519,-1.7947903324  
H,0,1.3270656501,0.8296026553,-1.7124941485  
H,0,-1.309170224,-2.106655157,0.6031708956  
H,0,-0.0170325167,-2.4043666695,1.7610547487  
H,0,-0.5528526236,-3.6917743477,0.6824139483  
H,0,3.2616542817,-2.7989874373,1.2720154764  
H,0,1.9467820833,-1.8916543705,2.0191150097  
H,0,3.2838419574,-1.0459843616,1.241926506  
H,0,3.3425709963,-0.7722821294,-1.2493738486  
H,0,2.2468780078,-1.7339759211,-2.2604071495  
H,0,3.566237842,-2.5011409035,-1.3765125273  
H,0,-3.0371200116,3.2992044812,0.0947129489  
H,0,-1.9620838105,3.2340142489,-1.3277451824  
H,0,-1.3669232507,3.9149429586,0.2163122833

### mPW1K/6-31+G\*\* (gas phase)

Filename: mpBBgasPCMts6

E(RmPW+HF-PW91) = -954.033081677

|                                 |                             |
|---------------------------------|-----------------------------|
| Zero-point correction=          | 0.226524 (Hartree/Particle) |
| Thermal correction to Energy=   | 0.241537                    |
| Thermal correction to Enthalpy= | 0.242481                    |

Thermal correction to Gibbs Free Energy= 0.183394  
 Sum of electronic and zero-point Energies= -953.806558  
 Sum of electronic and thermal Energies= -953.791544  
 Sum of electronic and thermal Enthalpies= -953.790600  
 Sum of electronic and thermal Free Energies= -953.849687

|       | E (Thermal)<br>KCal/Mol | CV<br>Cal/Mol-Kelvin | S<br>Cal/Mol-Kelvin |
|-------|-------------------------|----------------------|---------------------|
| Total | 151.567                 | 52.477               | 124.359             |

C,0,0.5948565742,-2.1479575631,-0.3041629011  
 C,0,1.9357581503,-1.9183967355,-0.1337656344  
 O,0,0.7044013123,-0.1545456348,-0.0864450559  
 C,0,0.443342206,0.5947891259,-1.2476751912  
 N,0,0.1111844368,1.6047847206,-0.3429434468  
 S,0,-1.4394467472,1.4784811229,0.251102486  
 O,0,-1.4060987708,1.3619774245,1.6928848348  
 O,0,-2.2200400608,0.5107023672,-0.5109394664  
 C,0,-0.412926731,-2.4840764742,0.7325089332  
 C,0,2.5979266427,-1.8627786396,1.1977174532  
 C,0,2.8368430195,-1.7772234738,-1.3133919061  
 C,0,-2.0404142059,3.0981040688,-0.1362133392  
 H,0,0.2497782603,-2.2345879123,-1.3279620033  
 H,0,-0.3564284262,0.1643720758,-1.8496961918  
 H,0,1.3374517038,0.8324390045,-1.8190377287  
 H,0,-1.336292116,-1.9466529655,0.5297104495  
 H,0,-0.0887220462,-2.2276027365,1.734852927  
 H,0,-0.631345523,-3.5526762194,0.7019825039  
 H,0,3.1709174519,-2.7775679947,1.3619198585  
 H,0,1.894018474,-1.7480909229,2.0133601856  
 H,0,3.2987344746,-1.0311972395,1.2333621272  
 H,0,3.3930141959,-0.8413267613,-1.2641836578  
 H,0,2.295810643,-1.8180075159,-2.2551114231  
 H,0,3.5757991081,-2.5801656184,-1.3120804197  
 H,0,-3.0436759283,3.1629390156,0.2743832236  
 H,0,-2.0608835234,3.2263138079,-1.2125894059  
 H,0,-1.3899755744,3.8271626738,0.3333597889

## mPW1K/6-31+G\*\* (onsager)

Filename: mpBBonsts6

E(RmPW+HF-PW91) = -954.036022137

Zero-point correction= 0.226533 (Hartree/Particle)  
 Thermal correction to Energy= 0.241557  
 Thermal correction to Enthalpy= 0.242501  
 Thermal correction to Gibbs Free Energy= 0.183376  
 Sum of electronic and zero-point Energies= -953.809489  
 Sum of electronic and thermal Energies= -953.794465  
 Sum of electronic and thermal Enthalpies= -953.793521  
 Sum of electronic and thermal Free Energies= -953.852646

|       | E (Thermal)<br>KCal/Mol | CV<br>Cal/Mol-Kelvin | S<br>Cal/Mol-Kelvin |
|-------|-------------------------|----------------------|---------------------|
| Total | 151.579                 | 52.519               | 124.439             |

C,0,0.6007163854,-2.1738401941,-0.2946110698  
 C,0,1.9401699492,-1.9348817527,-0.1431670608  
 O,0,0.6501289667,-0.1570224552,-0.0043927316  
 C,0,0.4304344969,0.6070361119,-1.1562232423  
 N,0,0.0938867202,1.5964980035,-0.223424999  
 S,0,-1.4840253349,1.5355212113,0.2901797563  
 O,0,-1.5265033881,1.5292501634,1.7377165195

O,0,-2.2583752653,0.538157458,-0.4368909944  
 C,0,-0.3799131978,-2.563641109,0.7503642799  
 C,0,2.6322184588,-1.9204071417,1.1738843381  
 C,0,2.8138027965,-1.7364134717,-1.3345560325  
 C,0,-2.0275457187,3.1371284662,-0.2430866376  
 H,0,0.2348961433,-2.2288289334,-1.3132014685  
 H,0,-0.3630249134,0.2056543875,-1.7853197048  
 H,0,1.3385907068,0.8479221219,-1.7024324527  
 H,0,-1.3143872639,-2.0313182262,0.5895256936  
 H,0,-0.0343427454,-2.3442952621,1.7547071783  
 H,0,-0.5854189751,-3.6330245597,0.6829085312  
 H,0,3.2488895515,-2.8157371746,1.2718379015  
 H,0,1.9468976392,-1.882090299,2.0122343828  
 H,0,3.2997485617,-1.0632663172,1.236802276  
 H,0,3.3672629813,-0.8006937093,-1.2586632312  
 H,0,2.2544830698,-1.7441678499,-2.2660650617  
 H,0,3.5581147005,-2.5326104513,-1.3826872581  
 H,0,-3.0508042888,3.2499155641,0.1030990095  
 H,0,-1.9857802925,3.1883090518,-1.3254544363  
 H,0,-1.3865357438,3.8860553675,0.2078645145

### B3LYP/6-31G\* (gas phase)

E(RB+HF-LYP) = -954.181440932

|                                              |                             |
|----------------------------------------------|-----------------------------|
| Zero-point correction=                       | 0.220966 (Hartree/Particle) |
| Thermal correction to Energy=                | 0.236356                    |
| Thermal correction to Enthalpy=              | 0.237300                    |
| Thermal correction to Gibbs Free Energy=     | 0.177177                    |
| Sum of electronic and zero-point Energies=   | -953.960475                 |
| Sum of electronic and thermal Energies=      | -953.945085                 |
| Sum of electronic and thermal Enthalpies=    | -953.944141                 |
| Sum of electronic and thermal Free Energies= | -954.004263                 |

|       | E (Thermal) | CV             | S              |
|-------|-------------|----------------|----------------|
|       | KCAL/MOL    | CAL/MOL-KELVIN | CAL/MOL-KELVIN |
| TOTAL | 148.316     | 53.682         | 126.539        |

Standard orientation:

| Center Number | Atomic Number | Atomic Type |   | Coordinates (Angstroms) |           |           |
|---------------|---------------|-------------|---|-------------------------|-----------|-----------|
|               |               |             |   | X                       | Y         | Z         |
| 1             | 6             | 0           | C | 1.898459                | 0.696101  | 0.715720  |
| 2             | 6             | 0           | C | 2.818584                | -0.113575 | 0.074144  |
| 3             | 8             | 0           | O | 0.590016                | -0.231573 | -0.447230 |
| 4             | 6             | 0           | C | -0.058653               | -1.414659 | -0.005735 |
| 5             | 7             | 0           | N | -1.154886               | -0.983422 | -0.793261 |
| 6             | 16            | 0           | S | -2.153045               | 0.121812  | 0.049404  |
| 7             | 8             | 0           | O | -1.999913               | 1.483588  | -0.482745 |
| 8             | 8             | 0           | O | -2.063127               | -0.083237 | 1.509456  |
| 9             | 6             | 0           | C | 1.557208                | 2.119600  | 0.393212  |
| 10            | 6             | 0           | C | 3.510120                | 0.259923  | -1.203869 |
| 11            | 6             | 0           | C | 3.221592                | -1.431990 | 0.673716  |
| 12            | 6             | 0           | C | -3.748303               | -0.501564 | -0.515329 |
| 13            | 1             | 0           | H | 1.533900                | 0.349833  | 1.681743  |
| 14            | 1             | 0           | H | -0.194626               | -1.455432 | 1.081789  |
| 15            | 1             | 0           | H | 0.390357                | -2.330816 | -0.406080 |
| 16            | 1             | 0           | H | 0.476554                | 2.268121  | 0.471838  |
| 17            | 1             | 0           | H | 1.865583                | 2.414339  | -0.611937 |
| 18            | 1             | 0           | H | 2.049096                | 2.788154  | 1.112740  |
| 19            | 1             | 0           | H | 4.565224                | 0.499803  | -1.004154 |
| 20            | 1             | 0           | H | 3.054820                | 1.117012  | -1.701281 |

|    |   |   |   |           |           |           |
|----|---|---|---|-----------|-----------|-----------|
| 21 | 1 | 0 | H | 3.506608  | -0.584376 | -1.903271 |
| 22 | 1 | 0 | H | 3.054498  | -2.257635 | -0.030404 |
| 23 | 1 | 0 | H | 2.685953  | -1.650469 | 1.602150  |
| 24 | 1 | 0 | H | 4.298739  | -1.430615 | 0.895264  |
| 25 | 1 | 0 | H | -4.507706 | 0.161084  | -0.093326 |
| 26 | 1 | 0 | H | -3.886300 | -1.521992 | -0.154472 |
| 27 | 1 | 0 | H | -3.769622 | -0.465296 | -1.605243 |

## MPW1K/6-31+G\* (gas phase)

E(RmPW+HF-PW91) = -954.006055041

|                                              |                             |
|----------------------------------------------|-----------------------------|
| Zero-point correction=                       | 0.227694 (Hartree/Particle) |
| Thermal correction to Energy=                | 0.242650                    |
| Thermal correction to Enthalpy=              | 0.243594                    |
| Thermal correction to Gibbs Free Energy=     | 0.184754                    |
| Sum of electronic and zero-point Energies=   | -953.778361                 |
| Sum of electronic and thermal Energies=      | -953.763405                 |
| Sum of electronic and thermal Enthalpies=    | -953.762461                 |
| Sum of electronic and thermal Free Energies= | -953.821301                 |

|       | E (Thermal) | CV             | S              |
|-------|-------------|----------------|----------------|
|       | KCAL/MOL    | CAL/MOL-KELVIN | CAL/MOL-KELVIN |
| TOTAL | 152.265     | 52.281         | 123.840        |

C,0,0.5927342553,-2.1475392776,-0.2981227551  
C,0,1.9348246251,-1.9213349157,-0.133825654  
O,0,0.6979291027,-0.156473712,-0.0794502728  
C,0,0.4495715887,0.5960582697,-1.2402701017  
N,0,0.1073474234,1.6031877938,-0.3364498298  
S,0,-1.4497772587,1.476502139,0.2401061167  
O,0,-1.4325214856,1.3466832466,1.6809064035  
O,0,-2.2265863847,0.5202553596,-0.5394156732  
C,0,-0.4105675183,-2.4859165349,0.7431465678  
C,0,2.6053270665,-1.8682749633,1.1938685644  
C,0,2.8300681855,-1.77634753,-1.3178358409  
C,0,-2.0385103888,3.1035298514,-0.1385853359  
H,0,0.2410758159,-2.232743911,-1.320080499  
H,0,-0.3422106813,0.1672316167,-1.8534219682  
H,0,1.3501640881,0.8350886352,-1.8005043942  
H,0,-1.342728865,-1.9647523255,0.5356691469  
H,0,-0.0905660473,-2.2129355693,1.7432557021  
H,0,-0.6144798574,-3.5586757231,0.7261834606  
H,0,3.1917065566,-2.777434452,1.3478617507  
H,0,1.9068615633,-1.7690511923,2.0171255051  
H,0,3.2970672716,-1.0280895013,1.2324543395  
H,0,3.3870331156,-0.8398760304,-1.2700593789  
H,0,2.284417868,-1.813826933,-2.2580748244  
H,0,3.5703084963,-2.5792885317,-1.324516275  
H,0,-3.0474838183,3.1713428777,0.2595204137  
H,0,-2.0457523898,3.2447132032,-1.2142448197  
H,0,-1.3916656838,3.8271805048,0.3457064554

## MPW1K/6-31+G\* (gas phase)

E(RmPW+HF-PW91) = -954.009042478

|                                 |                             |
|---------------------------------|-----------------------------|
| Zero-point correction=          | 0.227673 (Hartree/Particle) |
| Thermal correction to Energy=   | 0.242653                    |
| Thermal correction to Enthalpy= | 0.243597                    |

Thermal correction to Gibbs Free Energy= 0.184608  
 Sum of electronic and zero-point Energies= -953.781370  
 Sum of electronic and thermal Energies= -953.766390  
 Sum of electronic and thermal Enthalpies= -953.765446  
 Sum of electronic and thermal Free Energies= -953.824434

|       | E (Thermal)<br>KCAL/MOL | CV<br>CAL/MOL-KELVIN | S<br>CAL/MOL-KELVIN |
|-------|-------------------------|----------------------|---------------------|
| TOTAL | 152.267                 | 52.325               | 124.152             |

C,0,0.6174844469,-2.1906087897,-0.3173255402  
 C,0,1.957509763,-1.9539359498,-0.1695508458  
 O,0,0.662860715,-0.1748918815,-0.0246883465  
 C,0,0.4523615288,0.5915625972,-1.1754824734  
 N,0,0.1084557115,1.5783254824,-0.2427839532  
 S,0,-1.472946685,1.5171328866,0.2594638113  
 O,0,-1.5255975024,1.5057545394,1.7065004077  
 O,0,-2.2447236296,0.5251718922,-0.4769851809  
 C,0,-0.3610466592,-2.5819084889,0.729915748  
 C,0,2.6548810374,-1.9406999353,1.14504687  
 C,0,2.8276893604,-1.752558816,-1.3633897348  
 C,0,-2.0085735131,3.1230122243,-0.2716569868  
 H,0,0.247160529,-2.2444356298,-1.3346455993  
 H,0,-0.3347813179,0.1914544511,-1.812845204  
 H,0,1.3650503236,0.8337092781,-1.7132108619  
 H,0,-1.3019750501,-2.0613319045,0.5642054844  
 H,0,-0.0200695303,-2.3505428443,1.7339199259  
 H,0,-0.5560053796,-3.6548127454,0.6720056464  
 H,0,3.2785689346,-2.8327905559,1.2380676889  
 H,0,1.9737084889,-1.9102912555,1.9880733459  
 H,0,3.3181119499,-1.079267559,1.2099525381  
 H,0,3.3815728127,-0.8160565896,-1.2884751366  
 H,0,2.2656717074,-1.7578947015,-2.2943451091  
 H,0,3.5732437814,-2.548417525,-1.4171375353  
 H,0,-3.0356714911,3.2385982882,0.0647750671  
 H,0,-1.9574749264,3.1812154894,-1.3540074138  
 H,0,-1.3713063019,3.8710057902,0.1877765895

## Epoxidation TS Isomer 7

B3LYP/6-31+G\*\* (PCM)

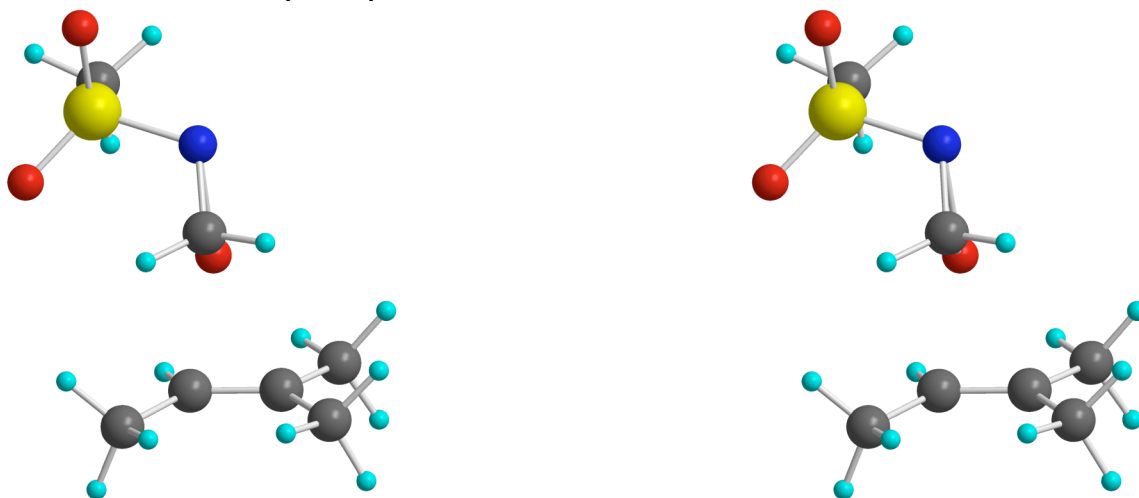

E(RB+HF-LYP) = -954.241944716

```

Zero-point correction= 0.218847 (Hartree/Particle)
Thermal correction to Energy= 0.234302
Thermal correction to Enthalpy= 0.235246
Thermal correction to Gibbs Free Energy= 0.175485
Sum of electronic and zero-point Energies= -954.023098
Sum of electronic and thermal Energies= -954.007643
Sum of electronic and thermal Enthalpies= -954.006699
Sum of electronic and thermal Free Energies= -954.066459

```

|       | E (Thermal)<br>KCal/Mol | CV<br>Cal/Mol-Kelvin | S<br>Cal/Mol-Kelvin |
|-------|-------------------------|----------------------|---------------------|
| Total | 147.027                 | 54.323               | 125.777             |

```

C,0,-0.4895952753,-2.2218947131,-0.4372953307
C,0,-0.5879424653,-2.0212805135,-1.7985631526
O,0,-0.2635314754,-0.0935625837,-0.5694456964
C,0,1.0534144206,0.4216019311,-0.5964804526
N,0,0.4201126659,1.6484071031,-0.2299805913
S,0,0.2886310797,1.891507829,1.4471116109
O,0,0.9088551598,3.2127549071,1.6947041539
O,0,0.7730050988,0.7451484929,2.2489279556
C,0,0.6807873148,-2.7390242858,0.3388353681
C,0,0.5538711817,-2.1939838157,-2.7580708075
C,0,-1.9129781697,-1.6876262546,-2.4221957411
C,0,-1.4841784663,2.054733743,1.6862911764
H,0,-1.4144920303,-2.1397491611,0.1318084261
H,0,0.8116246559,-2.1568215833,1.2574408243
H,0,1.6196176506,-2.7290960753,-0.2191390433
H,0,0.4838348518,-3.7753472964,0.6451201435
H,0,0.3596489813,-3.0627821651,-3.4020867851
H,0,1.5184588386,-2.3470379441,-2.2718276432
H,0,0.6288375615,-1.3267157164,-3.4250041616
H,0,-1.8330124234,-0.7903464838,-3.0464128597
H,0,-2.690927832,-1.5242903433,-1.6728738096
H,0,-2.2315387128,-2.5073231673,-3.0810097265
H,0,1.4917778694,0.4780308665,-1.5974243218
H,0,1.7211929942,-0.0431953205,0.1352418958
H,0,-1.6351616617,2.3344202196,2.7314494191
H,0,-1.949394653,1.0954985607,1.4612074513
H,0,-1.8462241593,2.8370877699,1.017974698

```

### B3LYPL/6-31+G\*\* (gas phase)

Filename: b3BBgasPCMTs7

E(RB+HF-LYP) = -954.226584967

```

Zero-point correction= 0.219518 (Hartree/Particle)
Thermal correction to Energy= 0.234800
Thermal correction to Enthalpy= 0.235744
Thermal correction to Gibbs Free Energy= 0.176660
Sum of electronic and zero-point Energies= -954.007067
Sum of electronic and thermal Energies= -953.991785
Sum of electronic and thermal Enthalpies= -953.990841
Sum of electronic and thermal Free Energies= -954.049925

```

|       | E (Thermal)<br>KCal/Mol | CV<br>Cal/Mol-Kelvin | S<br>Cal/Mol-Kelvin |
|-------|-------------------------|----------------------|---------------------|
| Total | 147.339                 | 54.057               | 124.353             |

```

C,0,-0.4960099758,-2.1322472109,-0.4655997185
C,0,-0.5628425871,-2.0499438051,-1.85033308
O,0,-0.3721907363,-0.1672366338,-0.6554822555

```



C,0,0.9064864284,0.4742760403,-0.694996348  
 N,0,0.2840260375,1.6423906273,-0.1927463954  
 S,0,0.3032268343,1.743316075,1.5015629237  
 O,0,1.1330773225,2.9135442303,1.8398772794  
 O,0,0.6109227249,0.4516633663,2.1559893451  
 C,0,0.6527460391,-2.5768237775,0.3852304312  
 C,0,0.6205325876,-2.2312730154,-2.7554515071  
 C,0,-1.8807635802,-1.8273283358,-2.5333284039  
 C,0,-1.4119165926,2.1631616543,1.8470336891  
 H,0,-1.4466914592,-2.0812374139,0.0589340371  
 H,0,0.7409377175,-1.9166646693,1.2547748079  
 H,0,1.6087638583,-2.5958262571,-0.1423384748  
 H,0,0.4545460949,-3.5901274673,0.7580396203  
 H,0,0.4976098023,-3.1549036085,-3.3383341296  
 H,0,1.571622731,-2.2951867182,-2.2252449088  
 H,0,0.678884736,-1.4132121072,-3.4830674545  
 H,0,-1.8238048932,-0.9749791451,-3.2196700915  
 H,0,-2.6863798951,-1.6424565022,-1.8197449106  
 H,0,-2.1442054614,-2.7074872599,-3.1367899272  
 H,0,1.2734262891,0.6207371709,-1.7158216998  
 H,0,1.6428292184,-0.0271812651,-0.0576365522  
 H,0,-1.4772000555,2.3556536481,2.9196384547  
 H,0,-2.0405331304,1.3211712911,1.5580353543  
 H,0,-1.6624070549,3.0573150888,1.2757729147

### B3LYP/6-31+G\*\* (Onsager)

Filename: b3BBonsts7

E(RB+HF-LYP) = -954.233368444

|                                              |                             |
|----------------------------------------------|-----------------------------|
| Zero-point correction=                       | 0.219129 (Hartree/Particle) |
| Thermal correction to Energy=                | 0.234636                    |
| Thermal correction to Enthalpy=              | 0.235581                    |
| Thermal correction to Gibbs Free Energy=     | 0.175521                    |
| Sum of electronic and zero-point Energies=   | -954.014239                 |
| Sum of electronic and thermal Energies=      | -953.998732                 |
| Sum of electronic and thermal Enthalpies=    | -953.997788                 |
| Sum of electronic and thermal Free Energies= | -954.057847                 |

|       | E (Thermal) | CV             | S              |
|-------|-------------|----------------|----------------|
|       | KCal/Mol    | Cal/Mol-Kelvin | Cal/Mol-Kelvin |
| Total | 147.237     | 54.307         | 126.406        |

C,0,-0.4913165428,-2.176866237,-0.4375468195  
 C,0,-0.5968144293,-2.0093912785,-1.8037388954  
 O,0,-0.2431987255,-0.0689598402,-0.5646105784  
 C,0,1.0745916256,0.441202434,-0.5836032184  
 N,0,0.4620946048,1.6776147645,-0.2198083679  
 S,0,0.3108425817,1.9077605645,1.4597459099  
 O,0,0.8489835629,3.2574178567,1.7261543759  
 O,0,0.828643688,0.7752158706,2.2568305623  
 C,0,0.6696171165,-2.7080091832,0.3444421555  
 C,0,0.5375613831,-2.2209567198,-2.7634214259  
 C,0,-1.9200447317,-1.6718498783,-2.4266082185  
 C,0,-1.476663223,1.9811357727,1.6708755651  
 H,0,-1.4128264262,-2.0739301413,0.1301685134  
 H,0,0.811694596,-2.1191776936,1.2571307389  
 H,0,1.6069186567,-2.7203538731,-0.2160123376  
 H,0,0.4561904819,-3.7389920166,0.6561668418  
 H,0,0.337625897,-3.1122716136,-3.3733978822  
 H,0,1.5044187067,-2.360511101,-2.2779275551  
 H,0,0.6102774338,-1.3806182288,-3.4636524722  
 H,0,-1.8325822684,-0.7913188048,-3.0728197464

H,0,-2.6918764312,-1.4805904551,-1.6781153992  
H,0,-2.2548509357,-2.5016326424,-3.0635749492  
H,0,1.5165520419,0.4906590861,-1.5837393232  
H,0,1.7341781333,-0.0319747053,0.1509662491  
H,0,-1.6591664519,2.2476784217,2.7138845744  
H,0,-1.8910318164,1.0023548572,1.4329981479  
H,0,-1.8651255277,2.7454787847,0.9975165549

## mPW1K/6-31+G\*\* (PCM)

Filename: mpBBgasPCMts7 (pcm)

E(RmPW+HF-PW91) = -954.049191479

|                                              |                             |
|----------------------------------------------|-----------------------------|
| Zero-point correction=                       | 0.226491 (Hartree/Particle) |
| Thermal correction to Energy=                | 0.241287                    |
| Thermal correction to Enthalpy=              | 0.242231                    |
| Thermal correction to Gibbs Free Energy=     | 0.184258                    |
| Sum of electronic and zero-point Energies=   | -953.822701                 |
| Sum of electronic and thermal Energies=      | -953.807905                 |
| Sum of electronic and thermal Enthalpies=    | -953.806960                 |
| Sum of electronic and thermal Free Energies= | -953.864934                 |

|       | E (Thermal)<br>KCal/Mol | CV<br>Cal/Mol-Kelvin | S<br>Cal/Mol-Kelvin |
|-------|-------------------------|----------------------|---------------------|
| Total | 151.410                 | 52.446               | 122.015             |

C,0,-0.5258470447,-2.120683923,-0.4109141781  
C,0,-0.5860279264,-1.9660668387,-1.7699272043  
O,0,-0.2923914505,-0.0882418594,-0.591153754  
C,0,1.0090563769,0.4125833207,-0.6872498039  
N,0,0.3927109422,1.606726756,-0.2672403764  
S,0,0.3133731279,1.7920741247,1.3767188554  
O,0,0.894875458,3.0958310665,1.6681570295  
O,0,0.8500019144,0.6428394924,2.0969243858  
C,0,0.6162836969,-2.6006628447,0.4075745847  
C,0,0.5735053805,-2.166227823,-2.6824610956  
C,0,-1.8808382815,-1.6509964315,-2.4350453323  
C,0,-1.419834613,1.8903914028,1.6844396891  
H,0,-1.4636043645,-2.0298800462,0.1239077014  
H,0,0.7469155664,-1.9542252062,1.2745680394  
H,0,1.5546711769,-2.6496660698,-0.1363243665  
H,0,0.3951679802,-3.6008705116,0.7823455633  
H,0,0.4058876734,-3.0635248263,-3.2814109833  
H,0,1.5213532255,-2.2825202966,-2.1678686621  
H,0,0.6536266789,-1.3375668048,-3.3856945952  
H,0,-1.7814177209,-0.772221084,-3.0709133875  
H,0,-2.6756684273,-1.4732698201,-1.7168823241  
H,0,-2.1752471099,-2.4805747084,-3.0805771703  
H,0,1.3825514712,0.481940614,-1.7051038966  
H,0,1.7074833596,-0.0652616844,-0.0041721172  
H,0,-1.5433097182,2.1191712916,2.7391023833  
H,0,-1.8674413441,0.9354576153,1.436780896  
H,0,-1.8311430279,2.6845590947,1.0707231195

## mPW1K/6-31+G\*\* (gas phase)

Filename: mpBBgasPCMts7 (gas)

E(RmPW+HF-PW91) = -954.032784970

|                                              |                             |
|----------------------------------------------|-----------------------------|
| Zero-point correction=                       | 0.227049 (Hartree/Particle) |
| Thermal correction to Energy=                | 0.241741                    |
| Thermal correction to Enthalpy=              | 0.242685                    |
| Thermal correction to Gibbs Free Energy=     | 0.185193                    |
| Sum of electronic and zero-point Energies=   | -953.805736                 |
| Sum of electronic and thermal Energies=      | -953.791044                 |
| Sum of electronic and thermal Enthalpies=    | -953.790100                 |
| Sum of electronic and thermal Free Energies= | -953.847592                 |

|       | E (Thermal)<br>KCal/Mol | CV<br>Cal/Mol-Kelvin | S<br>Cal/Mol-Kelvin |
|-------|-------------------------|----------------------|---------------------|
| Total | 151.695                 | 52.287               | 121.004             |

C,0,-0.4939114335,-2.104967064,-0.4204555096  
 C,0,-0.5686807482,-1.9813434893,-1.787435435  
 O,0,-0.3349453096,-0.1662223163,-0.6399244925  
 C,0,0.9478962133,0.417222911,-0.7020854264  
 N,0,0.3297374496,1.5801688063,-0.2370182708  
 S,0,0.2952818347,1.6971265626,1.4166980819  
 O,0,1.0388426048,2.8871169808,1.7808916246  
 O,0,0.649230687,0.438981147,2.0632946087  
 C,0,0.6556282165,-2.550538699,0.4067415069  
 C,0,0.5939334064,-2.1586532349,-2.700855308  
 C,0,-1.8778317252,-1.722862593,-2.4488647328  
 C,0,-1.4154681151,2.0161783771,1.7170328056  
 H,0,-1.432699594,-2.0422686024,0.1125435435  
 H,0,0.7775982476,-1.8709531049,1.2498337832  
 H,0,1.5914375796,-2.6068061784,-0.1406897742  
 H,0,0.4442350369,-3.5410946242,0.8103140006  
 H,0,0.4542978155,-3.0665944223,-3.2906682189  
 H,0,1.5440338897,-2.2400924477,-2.1842712008  
 H,0,0.6509398169,-1.3342928651,-3.4108426758  
 H,0,-1.8110494286,-0.8571992542,-3.1058901849  
 H,0,-2.6691487993,-1.5456507885,-1.7272081341  
 H,0,-2.1571897456,-2.5773430587,-3.0681891283  
 H,0,1.3148811312,0.5253796275,-1.7194815187  
 H,0,1.6603984967,-0.080251344,-0.0467318529  
 H,0,-1.5213837094,2.1985187893,2.7818624333  
 H,0,-1.9908489598,1.1509708323,1.4103997989  
 H,0,-1.7005218581,2.8945840532,1.1493026766

## mPW1K/6-31+G\*\* (Onsager)

Filename: mpBBonsts7  
 E(RmPW+HF-PW91) = -954.039004265

|                                              |                             |
|----------------------------------------------|-----------------------------|
| Zero-point correction=                       | 0.226817 (Hartree/Particle) |
| Thermal correction to Energy=                | 0.241652                    |
| Thermal correction to Enthalpy=              | 0.242596                    |
| Thermal correction to Gibbs Free Energy=     | 0.184432                    |
| Sum of electronic and zero-point Energies=   | -953.812187                 |
| Sum of electronic and thermal Energies=      | -953.797353                 |
| Sum of electronic and thermal Enthalpies=    | -953.796409                 |
| Sum of electronic and thermal Free Energies= | -953.854572                 |

|       | E (Thermal)<br>KCal/Mol | CV<br>Cal/Mol-Kelvin | S<br>Cal/Mol-Kelvin |
|-------|-------------------------|----------------------|---------------------|
| Total | 151.639                 | 52.425               | 122.415             |

C,0,-0.511056762,-2.0968547466,-0.4093572945  
 C,0,-0.5913074931,-1.9565326974,-1.7702096415  
 O,0,-0.2728041754,-0.0877202596,-0.5881357884  
 C,0,1.0308527289,0.4133024526,-0.6593567662

N,0,0.4309981442,1.6163166206,-0.2519302443  
 S,0,0.3200759567,1.7935054,1.3928533524  
 O,0,0.8654459477,3.1018285366,1.712619196  
 O,0,0.837926177,0.6383813044,2.114104722  
 C,0,0.6326644974,-2.5892266619,0.400261234  
 C,0,0.5543301967,-2.1718739776,-2.6959400324  
 C,0,-1.8936065419,-1.6407079145,-2.4185777994  
 C,0,-1.427359584,1.8687455201,1.64810134  
 H,0,-1.4417877458,-1.9999830452,0.1329211  
 H,0,0.7734720612,-1.9476476416,1.2694249597  
 H,0,1.5656414675,-2.6425776307,-0.1523890288  
 H,0,0.4083695679,-3.5911961428,0.7674135497  
 H,0,0.3760595113,-3.0745766352,-3.2828554789  
 H,0,1.5077622894,-2.2877235204,-2.1920788306  
 H,0,0.6280769252,-1.3520770179,-3.4096421911  
 H,0,-1.7991529719,-0.7718548095,-3.0680173522  
 H,0,-2.6759352269,-1.447189999,-1.6914247811  
 H,0,-2.2060008142,-2.476314943,-3.046961194  
 H,0,1.4205332735,0.4732703036,-1.6720676631  
 H,0,1.7123020634,-0.0730692854,0.0353523735  
 H,0,-1.5860172204,2.0901028129,2.6989834662  
 H,0,-1.8572766401,0.9112393364,1.3813408444  
 H,0,-1.8275136322,2.6595506413,1.0238739486

### B3LYP/6-31G\* (gas phase)

E(RB+HF-LYP) = -954.182500320

|                                              |                             |
|----------------------------------------------|-----------------------------|
| Zero-point correction=                       | 0.221367 (Hartree/Particle) |
| Thermal correction to Energy=                | 0.236491                    |
| Thermal correction to Enthalpy=              | 0.237436                    |
| Thermal correction to Gibbs Free Energy=     | 0.178811                    |
| Sum of electronic and zero-point Energies=   | -953.961134                 |
| Sum of electronic and thermal Energies=      | -953.946009                 |
| Sum of electronic and thermal Enthalpies=    | -953.945065                 |
| Sum of electronic and thermal Free Energies= | -954.003689                 |

|       | E (Thermal)<br>KCAL/MOL | CV<br>CAL/MOL-KELVIN | S<br>CAL/MOL-KELVIN |
|-------|-------------------------|----------------------|---------------------|
| TOTAL | 148.401                 | 53.545               | 123.386             |

Standard orientation:

| Center<br>Number | Atomic<br>Number | Atomic<br>Type |   | Coordinates (Angstroms) |           |           |
|------------------|------------------|----------------|---|-------------------------|-----------|-----------|
|                  |                  |                |   | X                       | Y         | Z         |
| 1                | 6                | 0              | C | -1.916300               | 0.556289  | -0.891507 |
| 2                | 6                | 0              | C | -2.805853               | -0.211902 | -0.150519 |
| 3                | 8                | 0              | O | -0.604248               | -0.524697 | 0.035108  |
| 4                | 6                | 0              | C | -0.018045               | -0.078088 | 1.261019  |
| 5                | 7                | 0              | N | 1.131057                | -0.838428 | 0.939653  |
| 6                | 16               | 0              | S | 2.283716                | 0.034688  | 0.059400  |
| 7                | 8                | 0              | O | 3.507500                | 0.058074  | 0.874768  |
| 8                | 8                | 0              | O | 1.764860                | 1.314649  | -0.467856 |
| 9                | 6                | 0              | C | -1.545085               | 1.994322  | -0.698466 |
| 10               | 6                | 0              | C | -3.419624               | 0.237855  | 1.142626  |
| 11               | 6                | 0              | C | -3.246364               | -1.555608 | -0.653599 |
| 12               | 6                | 0              | C | 2.565872                | -1.067689 | -1.335180 |
| 13               | 1                | 0              | H | -1.644817               | 0.155930  | -1.865178 |
| 14               | 1                | 0              | H | -0.464457               | 2.110934  | -0.836398 |
| 15               | 1                | 0              | H | -1.818446               | 2.389377  | 0.283041  |
| 16               | 1                | 0              | H | -2.049631               | 2.604564  | -1.459421 |
| 17               | 1                | 0              | H | -4.504026               | 0.366203  | 1.009966  |

|    |   |   |   |           |           |           |
|----|---|---|---|-----------|-----------|-----------|
| 18 | 1 | 0 | H | -3.015376 | 1.181166  | 1.514348  |
| 19 | 1 | 0 | H | -3.293644 | -0.526482 | 1.919692  |
| 20 | 1 | 0 | H | -3.091999 | -2.328212 | 0.109116  |
| 21 | 1 | 0 | H | -2.708076 | -1.851842 | -1.557181 |
| 22 | 1 | 0 | H | -4.323000 | -1.542070 | -0.878917 |
| 23 | 1 | 0 | H | -0.531883 | -0.477119 | 2.142375  |
| 24 | 1 | 0 | H | 0.080924  | 1.011864  | 1.304084  |
| 25 | 1 | 0 | H | 3.373995  | -0.633793 | -1.928697 |
| 26 | 1 | 0 | H | 1.646541  | -1.135466 | -1.917828 |
| 27 | 1 | 0 | H | 2.854525  | -2.046346 | -0.949378 |

### B3LYLP/6-31G\* (Onsager)

Key Distances: N-O 1.936; O-Csec 2.045; O-Ctert 2.305

E(RB+HF-LYP) = -954.188519323

|                                              |                             |
|----------------------------------------------|-----------------------------|
| Zero-point correction=                       | 0.221315 (Hartree/Particle) |
| Thermal correction to Energy=                | 0.236465                    |
| Thermal correction to Enthalpy=              | 0.237409                    |
| Thermal correction to Gibbs Free Energy=     | 0.178865                    |
| Sum of electronic and zero-point Energies=   | -953.967205                 |
| Sum of electronic and thermal Energies=      | -953.952054                 |
| Sum of electronic and thermal Enthalpies=    | -953.951110                 |
| Sum of electronic and thermal Free Energies= | -954.009655                 |

|       | E (Thermal)<br>KCAL/MOL | CV<br>CAL/MOL-KELVIN | S<br>CAL/MOL-KELVIN |
|-------|-------------------------|----------------------|---------------------|
| TOTAL | 148.384                 | 53.620               | 123.217             |

Standard orientation:

| Center<br>Number | Atomic<br>Number | Atomic<br>Type | Coordinates (Angstroms) |           |           |
|------------------|------------------|----------------|-------------------------|-----------|-----------|
|                  |                  |                | X                       | Y         | Z         |
| 1                | 6                | 0 C            | 1.978853                | 0.588047  | 0.895510  |
| 2                | 6                | 0 C            | 2.806659                | -0.232831 | 0.152294  |
| 3                | 8                | 0 O            | 0.525378                | -0.495844 | -0.050112 |
| 4                | 6                | 0 C            | 0.002173                | -0.037456 | -1.282189 |
| 5                | 7                | 0 N            | -1.148167               | -0.816393 | -0.968757 |
| 6                | 16               | 0 S            | -2.303989               | 0.024004  | -0.058228 |
| 7                | 8                | 0 O            | -3.587298               | -0.157167 | -0.759570 |
| 8                | 8                | 0 O            | -1.888191               | 1.395409  | 0.301084  |
| 9                | 6                | 0 C            | 1.643659                | 2.029112  | 0.667185  |
| 10               | 6                | 0 C            | 3.427293                | 0.167763  | -1.153701 |
| 11               | 6                | 0 C            | 3.189961                | -1.589136 | 0.667960  |
| 12               | 6                | 0 C            | -2.361494               | -0.955049 | 1.452830  |
| 13               | 1                | 0 H            | 1.682523                | 0.206953  | 1.869906  |
| 14               | 1                | 0 H            | 0.567483                | 2.183742  | 0.806677  |
| 15               | 1                | 0 H            | 1.923926                | 2.391461  | -0.325036 |
| 16               | 1                | 0 H            | 2.166631                | 2.647708  | 1.408766  |
| 17               | 1                | 0 H            | 4.515129                | 0.263515  | -1.027281 |
| 18               | 1                | 0 H            | 3.053444                | 1.115431  | -1.545961 |
| 19               | 1                | 0 H            | 3.275025                | -0.611883 | -1.910302 |
| 20               | 1                | 0 H            | 2.974674                | -2.364226 | -0.077116 |
| 21               | 1                | 0 H            | 2.666642                | -1.842147 | 1.593250  |
| 22               | 1                | 0 H            | 4.271371                | -1.627070 | 0.860747  |
| 23               | 1                | 0 H            | 0.527806                | -0.434608 | -2.157478 |
| 24               | 1                | 0 H            | -0.114826               | 1.050481  | -1.326039 |
| 25               | 1                | 0 H            | -3.168572               | -0.551416 | 2.068936  |
| 26               | 1                | 0 H            | -1.400413               | -0.865875 | 1.959043  |
| 27               | 1                | 0 H            | -2.561581               | -1.993279 | 1.184279  |

## BP86 (gas phase)

E(RB-P86) = -954.231678674

|                                              |                             |
|----------------------------------------------|-----------------------------|
| Zero-point correction=                       | 0.214234 (Hartree/Particle) |
| Thermal correction to Energy=                | 0.229821                    |
| Thermal correction to Enthalpy=              | 0.230766                    |
| Thermal correction to Gibbs Free Energy=     | 0.171111                    |
| Sum of electronic and zero-point Energies=   | -954.017444                 |
| Sum of electronic and thermal Energies=      | -954.001857                 |
| Sum of electronic and thermal Enthalpies=    | -954.000913                 |
| Sum of electronic and thermal Free Energies= | -954.060568                 |

|       | E (Thermal)<br>KCAL/MOL | CV<br>CAL/MOL-KELVIN | S<br>CAL/MOL-KELVIN |
|-------|-------------------------|----------------------|---------------------|
| TOTAL | 144.215                 | 55.131               | 125.554             |

Standard orientation:

| Center<br>Number | Atomic<br>Number | Atomic<br>Type | Coordinates (Angstroms) |           |           |
|------------------|------------------|----------------|-------------------------|-----------|-----------|
|                  |                  |                | X                       | Y         | Z         |
| 1                | 6                | 0              | -1.955910               | 0.538809  | -0.909630 |
| 2                | 6                | 0              | -2.839180               | -0.230326 | -0.149516 |
| 3                | 8                | 0              | -0.587313               | -0.524339 | 0.073351  |
| 4                | 6                | 0              | -0.012913               | 0.021250  | 1.258693  |
| 5                | 7                | 0              | 1.132024                | -0.795710 | 0.976028  |
| 6                | 16               | 0              | 2.303805                | 0.045984  | 0.042934  |
| 7                | 8                | 0              | 3.505368                | 0.143863  | 0.914741  |
| 8                | 8                | 0              | 1.787256                | 1.283054  | -0.612642 |
| 9                | 6                | 0              | -1.598238               | 1.985562  | -0.738277 |
| 10               | 6                | 0              | -3.464777               | 0.239346  | 1.135234  |
| 11               | 6                | 0              | -3.249716               | -1.599093 | -0.622458 |
| 12               | 6                | 0              | 2.636790                | -1.180541 | -1.248272 |
| 13               | 1                | 0              | -1.662187               | 0.112555  | -1.876964 |
| 14               | 1                | 0              | -0.510189               | 2.113769  | -0.883889 |
| 15               | 1                | 0              | -1.875030               | 2.395205  | 0.246742  |
| 16               | 1                | 0              | -2.112155               | 2.589404  | -1.511289 |
| 17               | 1                | 0              | -4.563117               | 0.325481  | 1.008947  |
| 18               | 1                | 0              | -3.089688               | 1.215993  | 1.478175  |
| 19               | 1                | 0              | -3.306877               | -0.499988 | 1.943121  |
| 20               | 1                | 0              | -3.076134               | -2.357898 | 0.162545  |
| 21               | 1                | 0              | -2.699930               | -1.905800 | -1.526643 |
| 22               | 1                | 0              | -4.334952               | -1.620077 | -0.850284 |
| 23               | 1                | 0              | -0.518230               | -0.301857 | 2.188247  |
| 24               | 1                | 0              | 0.111269                | 1.120297  | 1.218000  |
| 25               | 1                | 0              | 3.473678                | -0.796213 | -1.851837 |
| 26               | 1                | 0              | 1.730460                | -1.298314 | -1.859257 |
| 27               | 1                | 0              | 2.909203                | -2.128997 | -0.762992 |

## MPW1K/6-31+G\* (gas phase)

E(RmPW+HF-PW91) = -954.005743621

|                                            |                             |
|--------------------------------------------|-----------------------------|
| Zero-point correction=                     | 0.228189 (Hartree/Particle) |
| Thermal correction to Energy=              | 0.242851                    |
| Thermal correction to Enthalpy=            | 0.243795                    |
| Thermal correction to Gibbs Free Energy=   | 0.186324                    |
| Sum of electronic and zero-point Energies= | -953.777555                 |
| Sum of electronic and thermal Energies=    | -953.762893                 |
| Sum of electronic and thermal Enthalpies=  | -953.761948                 |

Sum of electronic and thermal Free Energies= -953.819420

|       | E (Thermal)<br>KCAL/MOL | CV<br>CAL/MOL-KELVIN | S<br>CAL/MOL-KELVIN |
|-------|-------------------------|----------------------|---------------------|
| TOTAL | 152.391                 | 52.094               | 120.959             |

C,0,-0.4878654963,-2.1093250204,-0.4194506759  
C,0,-0.5682640088,-1.9826658054,-1.7856679556  
O,0,-0.3295551195,-0.1704865136,-0.6348478806  
C,0,0.952805767,0.4122359019,-0.6938691716  
N,0,0.3334770295,1.5763304938,-0.2342284182  
S,0,0.2913950136,1.6998141027,1.4187066418  
O,0,1.0365594549,2.889125338,1.7814331341  
O,0,0.6363826999,0.4437836623,2.0731457934  
C,0,0.6641302476,-2.5608522424,0.402154669  
C,0,0.5899277536,-2.1568324262,-2.7057336112  
C,0,-1.8799316223,-1.7195033496,-2.4409456161  
C,0,-1.4208404851,2.0266893231,1.7071825023  
H,0,-1.4237964942,-2.0467969916,0.1189029057  
H,0,0.7844897117,-1.8940601493,1.2560090944  
H,0,1.6014226222,-2.6057087743,-0.1452465618  
H,0,0.4578654669,-3.5590278489,0.7921747079  
H,0,0.4489906988,-3.0633650881,-3.2990568521  
H,0,1.5439900875,-2.2395459372,-2.1949880827  
H,0,0.6442667639,-1.3295138252,-3.413742503  
H,0,-1.8162929289,-0.8489310475,-3.0931036066  
H,0,-2.6701515006,-1.5465936862,-1.715709422  
H,0,-2.1631962175,-2.5698917411,-3.0656893576  
H,0,1.3227074054,0.5172734239,-1.7104523117  
H,0,1.6633842264,-0.0845070295,-0.0362418567  
H,0,-1.5349851869,2.214751264,2.771028161  
H,0,-2.0002747107,1.1627132097,1.4020957206  
H,0,-1.7019485839,2.9040069419,1.1344434034

## MPW1K/6-31+G\* (Onsager)

E(RmPW+HF-PW91) = -954.012815112

|                                              |                             |
|----------------------------------------------|-----------------------------|
| Zero-point correction=                       | 0.227855 (Hartree/Particle) |
| Thermal correction to Energy=                | 0.242708                    |
| Thermal correction to Enthalpy=              | 0.243652                    |
| Thermal correction to Gibbs Free Energy=     | 0.185265                    |
| Sum of electronic and zero-point Energies=   | -953.784960                 |
| Sum of electronic and thermal Energies=      | -953.770107                 |
| Sum of electronic and thermal Enthalpies=    | -953.769163                 |
| Sum of electronic and thermal Free Energies= | -953.827550                 |

|       | E (Thermal)<br>KCAL/MOL | CV<br>CAL/MOL-KELVIN | S<br>CAL/MOL-KELVIN |
|-------|-------------------------|----------------------|---------------------|
| TOTAL | 152.301                 | 52.288               | 122.886             |

C,0,-0.5089461672,-2.1663866265,-0.4067121395  
C,0,-0.6050476904,-2.0065752968,-1.763519022  
O,0,-0.2620605481,-0.1413649036,-0.5713319216  
C,0,1.0453621858,0.3452927157,-0.6245344706  
N,0,0.4419963911,1.5573360586,-0.2477072968  
S,0,0.2966120117,1.7656736224,1.3906719775  
O,0,0.8185232449,3.0883357428,1.6918393608  
O,0,0.8146673979,0.6344804321,2.1474803779  
C,0,0.6419358372,-2.6795056564,0.3807783019  
C,0,0.5262991196,-2.2160948365,-2.7084270743  
C,0,-1.913307962,-1.6718327057,-2.3908831627  
C,0,-1.4571460844,1.8249558927,1.6113549925

H,0,-1.4309015799,-2.0689740332,0.1507849959  
H,0,0.7876198892,-2.0680295289,1.2711146572  
H,0,1.5729734988,-2.7126932242,-0.1781455877  
H,0,0.4243177439,-3.6946626498,0.7176185163  
H,0,0.3342819111,-3.1084800026,-3.3081594068  
H,0,1.4869397424,-2.3472434586,-2.2205276216  
H,0,0.5975209841,-1.3850795148,-3.4105839921  
H,0,-1.8221163589,-0.7926685304,-3.028134236  
H,0,-2.6870714653,-1.4852327834,-1.6514764606  
H,0,-2.240231824,-2.4952332909,-3.0293195572  
H,0,1.4554213873,0.3875360663,-1.6299439885  
H,0,1.709423972,-0.1339540009,0.0911267789  
H,0,-1.6403640225,2.0731167943,2.6531377731  
H,0,-1.8735991225,0.8554752318,1.364639328  
H,0,-1.8579178697,2.5932614676,0.9588211499

## Epoxidation TS Isomer 8

B3LYP/6-31+G\*\*

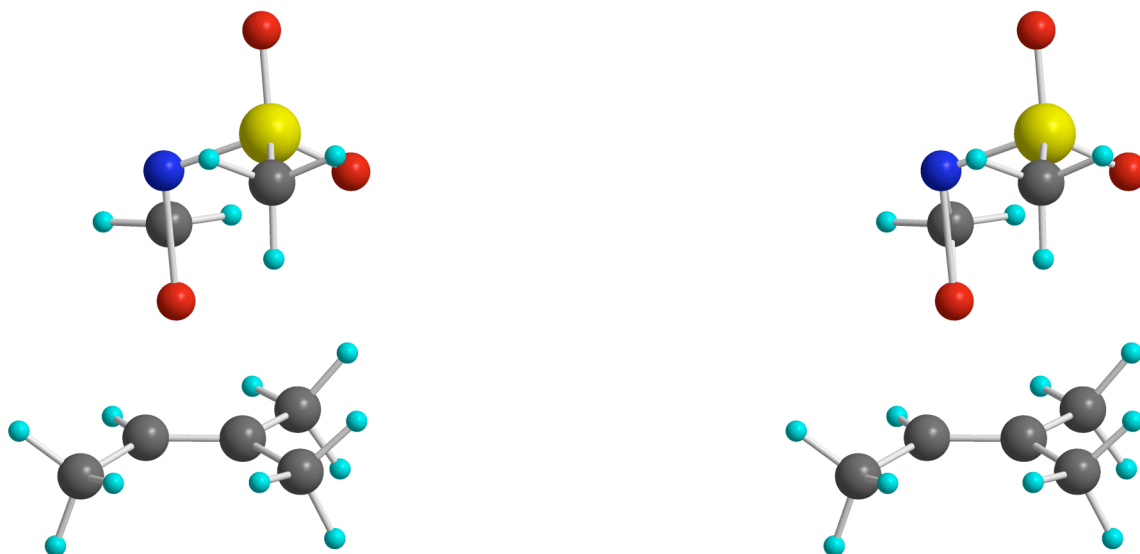

E(RB+HF-LYP) = -954.243234987

|                                              |                             |
|----------------------------------------------|-----------------------------|
| Zero-point correction=                       | 0.218584 (Hartree/Particle) |
| Thermal correction to Energy=                | 0.234177                    |
| Thermal correction to Enthalpy=              | 0.235121                    |
| Thermal correction to Gibbs Free Energy=     | 0.174801                    |
| Sum of electronic and zero-point Energies=   | -954.024651                 |
| Sum of electronic and thermal Energies=      | -954.009058                 |
| Sum of electronic and thermal Enthalpies=    | -954.008114                 |
| Sum of electronic and thermal Free Energies= | -954.068434                 |

|       | E (Thermal)<br>KCal/Mol | CV<br>Cal/Mol-Kelvin | S<br>Cal/Mol-Kelvin |
|-------|-------------------------|----------------------|---------------------|
| Total | 146.948                 | 54.405               | 126.955             |

C,0,0.5740735795,-2.2518025688,-1.5020188522  
C,0,0.7922193379,-2.360339925,-0.1453852558  
O,0,-0.0051268404,-0.2950543231,-0.8240529196  
C,0,0.9425457041,0.7357070804,-1.0137166151  
N,0,-0.1912772977,1.5856730217,-0.8347593396  
S,0,-0.4740652055,2.0429071604,0.7790258773



O,0,-0.4915198557,3.5230508872,0.7667901213  
O,0,0.4226785809,1.3744113592,1.7482643685  
C,0,-0.6472896177,-2.6607286171,-2.2657110293  
C,0,-0.251346524,-2.8060277815,0.8354611604  
C,0,2.1501967748,-2.0899032084,0.4369675321  
C,0,-2.1524849257,1.4658166843,1.0529445207  
H,0,1.4362305835,-1.9829305635,-2.1144492562  
H,0,1.3391800779,0.7962086812,-2.0320383115  
H,0,1.7244690941,0.7611699295,-0.2485866522  
H,0,-0.842101695,-1.9509243574,-3.0754292252  
H,0,-1.5417754691,-2.724933985,-1.6435115728  
H,0,-0.4841322744,-3.6438551611,-2.7285549679  
H,0,0.004332945,-3.8041173069,1.2175395326  
H,0,-1.2542659113,-2.8535678384,0.4099603594  
H,0,-0.2666005726,-2.1316785741,1.6992492746  
H,0,2.0908910453,-1.3233973521,1.2194817554  
H,0,2.8731676795,-1.7727551979,-0.3192451499  
H,0,2.5346683877,-2.9990789405,0.918681736  
H,0,-2.4476622145,1.816852188,2.0443398189  
H,0,-2.1514241479,0.3774322057,1.002117415  
H,0,-2.7905982386,1.8975325033,0.2808066751

### B3LYP/6-31+G\*\* (gas phase)

Filename: b3BBgasPCMTs8 (gas)

E(RB+HF-LYP) = -954.228554512

|                                              |                             |
|----------------------------------------------|-----------------------------|
| Zero-point correction=                       | 0.219200 (Hartree/Particle) |
| Thermal correction to Energy=                | 0.234652                    |
| Thermal correction to Enthalpy=              | 0.235596                    |
| Thermal correction to Gibbs Free Energy=     | 0.175596                    |
| Sum of electronic and zero-point Energies=   | -954.009354                 |
| Sum of electronic and thermal Energies=      | -953.993902                 |
| Sum of electronic and thermal Enthalpies=    | -953.992958                 |
| Sum of electronic and thermal Free Energies= | -954.052959                 |

|       | E (Thermal) | CV             | S              |
|-------|-------------|----------------|----------------|
|       | KCal/Mol    | Cal/Mol-Kelvin | Cal/Mol-Kelvin |
| Total | 147.247     | 54.180         | 126.282        |

C,0,0.6257572951,-2.2532371157,-1.5285588231  
C,0,0.807690378,-2.3398359348,-0.1565136431  
O,0,-0.0477197066,-0.4515369702,-0.8748864898  
C,0,0.7918910068,0.6813644041,-1.0992349479  
N,0,-0.3240865051,1.4949658916,-0.788594611  
S,0,-0.4197931626,1.9007984378,0.8570516493  
O,0,-0.1288301634,3.3424917768,0.9586714804  
O,0,0.3340332517,0.9724762999,1.730017897  
C,0,-0.5323777033,-2.7643347505,-2.3298668144  
C,0,-0.2484353845,-2.8139879566,0.7945351401  
C,0,2.1186986862,-1.9723898516,0.4739438069  
C,0,-2.1776625108,1.6671867042,1.158002286  
H,0,1.496838244,-1.954636573,-2.1103487993  
H,0,1.0903201865,0.7877638079,-2.1476586572  
H,0,1.6521714437,0.7050099625,-0.4207873513  
H,0,-0.7287555522,-2.0969052144,-3.1737242616  
H,0,-1.4491755321,-2.8468528435,-1.7441348108  
H,0,-0.2978084311,-3.7554678653,-2.7415310274  
H,0,0.0665025652,-3.7583487782,1.2586733409  
H,0,-1.2178310655,-2.970692877,0.3215279174  
H,0,-0.3633747157,-2.0802359468,1.6003748199  
H,0,1.9713014186,-1.1563622579,1.1924647428  
H,0,2.868933623,-1.6714579327,-0.2618378617  
H,0,2.5134979695,-2.8276664768,1.0377059716

H,0,-2.3675905056,1.9976382373,2.1809019865  
H,0,-2.4137970504,0.6102387554,1.0349365264  
H,0,-2.7274150795,2.2796810678,0.4430415335

## B3LYP/6-31+G\*\* (Onsager)

Filename: b3BBonsts8

E(RB+HF-LYP) = -954.233541612

|                                              |                             |
|----------------------------------------------|-----------------------------|
| Zero-point correction=                       | 0.219081 (Hartree/Particle) |
| Thermal correction to Energy=                | 0.234626                    |
| Thermal correction to Enthalpy=              | 0.235570                    |
| Thermal correction to Gibbs Free Energy=     | 0.175300                    |
| Sum of electronic and zero-point Energies=   | -954.014461                 |
| Sum of electronic and thermal Energies=      | -953.998916                 |
| Sum of electronic and thermal Enthalpies=    | -953.997972                 |
| Sum of electronic and thermal Free Energies= | -954.058241                 |

|       | E (Thermal)<br>KCal/Mol | CV<br>Cal/Mol-Kelvin | S<br>Cal/Mol-Kelvin |
|-------|-------------------------|----------------------|---------------------|
| Total | 147.230                 | 54.289               | 126.848             |

C,0,0.5759466859,-2.2357151907,-1.4919001263  
C,0,0.7592311654,-2.3500486576,-0.1290575778  
O,0,-0.0164095873,-0.2992355403,-0.8300270341  
C,0,0.9067217474,0.7450539087,-1.0688042548  
N,0,-0.2126260236,1.6031623832,-0.8664402389  
S,0,-0.433292301,2.0806673686,0.7536956607  
O,0,-0.5495985879,3.5522979189,0.7240975415  
O,0,0.5420225921,1.4697157758,1.6817983726  
C,0,-0.6134927445,-2.6618664939,-2.2943479516  
C,0,-0.3074627436,-2.8167487022,0.8153639105  
C,0,2.0937029441,-2.0615382729,0.4963346165  
C,0,-2.0622068539,1.4050524308,1.1167555173  
H,0,1.4544835222,-1.9617475992,-2.0749066111  
H,0,1.2668074298,0.7873458534,-2.1020752029  
H,0,1.7172345843,0.7855089893,-0.3334463436  
H,0,-0.7872621342,-1.9607423965,-3.1157708721  
H,0,-1.5279953387,-2.7278989774,-1.7028464078  
H,0,-0.4272962065,-3.6475933181,-2.7413392962  
H,0,-0.0608818252,-3.8230576309,1.1806633197  
H,0,-1.298016987,-2.858356076,0.3620950636  
H,0,-0.3451276309,-2.1619518425,1.693235344  
H,0,1.9995064806,-1.2717950749,1.2521463482  
H,0,2.8442150227,-1.7628742254,-0.2400934698  
H,0,2.4630975178,-2.9556030505,1.0153602521  
H,0,-2.3329477851,1.7543528848,2.1151111282  
H,0,-1.9961568308,0.3182527004,1.0809828101  
H,0,-2.7592161122,1.7810278349,0.3675865017

## mPW1K/6-31+G\*\* (PCM)

Filename: mpBBPCMts8

E(RmPW+HF-PW91) = -954.050296352

|                                            |                             |
|--------------------------------------------|-----------------------------|
| Zero-point correction=                     | 0.226064 (Hartree/Particle) |
| Thermal correction to Energy=              | 0.241090                    |
| Thermal correction to Enthalpy=            | 0.242034                    |
| Thermal correction to Gibbs Free Energy=   | 0.182854                    |
| Sum of electronic and zero-point Energies= | -953.824232                 |
| Sum of electronic and thermal Energies=    | -953.809206                 |

Sum of electronic and thermal Enthalpies= -953.808262  
 Sum of electronic and thermal Free Energies= -953.867442

| Total | E (Thermal) |   | CV             |           | S              |
|-------|-------------|---|----------------|-----------|----------------|
|       | KCal/Mol    |   | Cal/Mol-Kelvin |           | Cal/Mol-Kelvin |
|       | 151.286     |   | 52.611         |           | 124.555        |
| 1     | 6           | 0 | 2.614950       | -0.593593 | -0.404407      |
| 2     | 6           | 0 | 2.299589       | 0.651044  | 0.068812       |
| 3     | 8           | 0 | 0.543006       | -0.640132 | -0.268409      |
| 4     | 6           | 0 | -0.133829      | -0.502840 | -1.483023      |
| 5     | 7           | 0 | -1.197393      | -1.047031 | -0.739730      |
| 6     | 16          | 0 | -2.130810      | 0.075069  | 0.043293       |
| 7     | 8           | 0 | -3.502405      | -0.151243 | -0.393141      |
| 8     | 8           | 0 | -1.604072      | 1.429360  | -0.079816      |
| 9     | 6           | 0 | 2.985442       | -1.793839 | 0.388620       |
| 10    | 6           | 0 | 2.155345       | 0.976642  | 1.513010       |
| 11    | 6           | 0 | 2.131222       | 1.800961  | -0.862793      |
| 12    | 6           | 0 | -2.006088      | -0.428033 | 1.727861       |
| 13    | 1           | 0 | 2.753845       | -0.682690 | -1.477281      |
| 14    | 1           | 0 | 0.215602       | -1.177594 | -2.260097      |
| 15    | 1           | 0 | -0.221882      | 0.528697  | -1.815541      |
| 16    | 1           | 0 | 2.555684       | -2.686541 | -0.060023      |
| 17    | 1           | 0 | 2.656054       | -1.739903 | 1.420872       |
| 18    | 1           | 0 | 4.069594       | -1.918443 | 0.384589       |
| 19    | 1           | 0 | 2.991469       | 1.602412  | 1.830387       |
| 20    | 1           | 0 | 2.127806       | 0.100623  | 2.151099       |
| 21    | 1           | 0 | 1.246959       | 1.556734  | 1.670089       |
| 22    | 1           | 0 | 1.147691       | 2.253373  | -0.732916      |
| 23    | 1           | 0 | 2.259802       | 1.514511  | -1.903264      |
| 24    | 1           | 0 | 2.865989       | 2.572641  | -0.627772      |
| 25    | 1           | 0 | -2.669111      | 0.212590  | 2.302165       |
| 26    | 1           | 0 | -0.977345      | -0.310227 | 2.046771       |
| 27    | 1           | 0 | -2.319474      | -1.463994 | 1.798787       |

### mPW1K/6-31+G\*\* (gas phase)

Filename: mpBBgasts8  
 E(RmPW+HF-PW91) = -954.034604333

Zero-point correction= 0.226816 (Hartree/Particle)  
 Thermal correction to Energy= 0.241637  
 Thermal correction to Enthalpy= 0.242581  
 Thermal correction to Gibbs Free Energy= 0.184417  
 Sum of electronic and zero-point Energies= -953.807788  
 Sum of electronic and thermal Energies= -953.792967  
 Sum of electronic and thermal Enthalpies= -953.792023  
 Sum of electronic and thermal Free Energies= -953.850187

| Total | E (Thermal) |  | CV             |  | S              |
|-------|-------------|--|----------------|--|----------------|
|       | KCal/Mol    |  | Cal/Mol-Kelvin |  | Cal/Mol-Kelvin |
|       | 151.630     |  | 52.366         |  | 122.417        |

C,0,0.5935214157,-2.1490446328,-1.5366227989  
 C,0,0.7589458837,-2.1916792965,-0.1736418786  
 O,0,-0.0373774427,-0.3604581049,-0.8880771596  
 C,0,0.8251353753,0.7278596767,-1.1198114084  
 N,0,-0.2808955772,1.5230320304,-0.811231821  
 S,0,-0.4041146056,1.8811164758,0.8029165596  
 O,0,-0.1976246118,3.3079628722,0.9568539031  
 O,0,0.3927450543,0.9806567103,1.6290445313  
 C,0,-0.571750281,-2.6316742688,-2.3224907016  
 C,0,-0.3064118832,-2.602504768,0.777969138

C,0,2.0618090813,-1.8395531483,0.4541231932  
 C,0,-2.111834092,1.543981556,1.0966136863  
 H,0,1.4701597193,-1.8852381593,-2.1163294329  
 H,0,1.1228394909,0.8195639444,-2.1616412784  
 H,0,1.6736954767,0.7394595272,-0.4379419924  
 H,0,-0.7585701021,-1.9646091867,-3.1603936875  
 H,0,-1.4799933432,-2.6904882652,-1.7328448806  
 H,0,-0.3642688086,-3.6219240999,-2.7308635385  
 H,0,-0.0200362981,-3.5327659719,1.2706313016  
 H,0,-1.2714002202,-2.7476847097,0.3067312939  
 H,0,-0.400547495,-1.840413876,1.5506745055  
 H,0,1.9206641134,-1.0066482511,1.1444441671  
 H,0,2.8208648931,-1.5781223641,-0.2783250994  
 H,0,2.4276949645,-2.6839873065,1.0393766548  
 H,0,-2.3193595138,1.8252078026,2.1242451895  
 H,0,-2.2911152087,0.4871044853,0.9379059474  
 H,0,-2.6981059848,2.1447013286,0.4106366065

### mpPW1K/6-31+G\*\* (Onsager)

Filename: mpBBonsts8blowest  
 E(RmPW+HF-PW91) = -954.040141440

|                                              |                             |
|----------------------------------------------|-----------------------------|
| Zero-point correction=                       | 0.226519 (Hartree/Particle) |
| Thermal correction to Energy=                | 0.241548                    |
| Thermal correction to Enthalpy=              | 0.242492                    |
| Thermal correction to Gibbs Free Energy=     | 0.182811                    |
| Sum of electronic and zero-point Energies=   | -953.813623                 |
| Sum of electronic and thermal Energies=      | -953.798594                 |
| Sum of electronic and thermal Enthalpies=    | -953.797650                 |
| Sum of electronic and thermal Free Energies= | -953.857330                 |

|       | E (Thermal) | CV             | S              |
|-------|-------------|----------------|----------------|
|       | KCal/Mol    | Cal/Mol-Kelvin | Cal/Mol-Kelvin |
| Total | 151.573     | 52.523         | 125.608        |

C,0,0.5625721558,-2.1977205321,-1.4858175434  
 C,0,0.7415886171,-2.2729018204,-0.1302950214  
 O,0,-0.0044345658,-0.3277011229,-0.8235095613  
 C,0,0.9201163349,0.6940606902,-1.0590690685  
 N,0,-0.1850872162,1.5302636757,-0.8385154729  
 S,0,-0.4109920023,1.9506857751,0.750085452  
 O,0,-0.5020485452,3.4001504554,0.7955809706  
 O,0,0.5360427231,1.2935225133,1.640713342  
 C,0,-0.6264612013,-2.6222839949,-2.2673514372  
 C,0,-0.3226871096,-2.6917386803,0.8197754903  
 C,0,2.0668396111,-1.9840475443,0.484622878  
 C,0,-2.0216149057,1.3014312157,1.0744483395  
 H,0,1.4399598328,-1.9497295067,-2.0715544955  
 H,0,1.2693010564,0.7354500178,-2.0878621874  
 H,0,1.7270884512,0.7166411703,-0.3296420607  
 H,0,-0.8003986446,-1.9339985979,-3.0907543313  
 H,0,-1.5305682585,-2.6715470722,-1.6704601398  
 H,0,-0.4522203739,-3.6087771813,-2.6990007572  
 H,0,-0.0932306044,-3.68514536,1.2087058765  
 H,0,-1.3082502075,-2.7279052174,0.3702639694  
 H,0,-0.3440920508,-2.0122632717,1.6705541384  
 H,0,1.9756333845,-1.1761584558,1.2115701906  
 H,0,2.8186167313,-1.7199824319,-0.2543175887  
 H,0,2.4191613701,-2.8626472924,1.026415185  
 H,0,-2.2932136934,1.6085876537,2.0795707266  
 H,0,-1.9804470847,0.2219360347,0.9939752075  
 H,0,-2.7081898046,1.7174838804,0.3460388993

## B3LYP/6-31G\* (gas phase)

E(RB+HF-LYP) = -954.184431488

|                                              |                             |
|----------------------------------------------|-----------------------------|
| Zero-point correction=                       | 0.221284 (Hartree/Particle) |
| Thermal correction to Energy=                | 0.236453                    |
| Thermal correction to Enthalpy=              | 0.237397                    |
| Thermal correction to Gibbs Free Energy=     | 0.178438                    |
| Sum of electronic and zero-point Energies=   | -953.963147                 |
| Sum of electronic and thermal Energies=      | -953.947978                 |
| Sum of electronic and thermal Enthalpies=    | -953.947034                 |
| Sum of electronic and thermal Free Energies= | -954.005994                 |

|       | E (Thermal)<br>KCAL/MOL | CV<br>CAL/MOL-KELVIN | S<br>CAL/MOL-KELVIN |
|-------|-------------------------|----------------------|---------------------|
| TOTAL | 148.377                 | 53.588               | 124.091             |

Standard orientation:

| Center<br>Number | Atomic<br>Number | Atomic<br>Type |   | Coordinates (Angstroms) |           |           |
|------------------|------------------|----------------|---|-------------------------|-----------|-----------|
|                  |                  |                |   | X                       | Y         | Z         |
| 1                | 6                | 0              | C | 2.660307                | -0.567334 | -0.368579 |
| 2                | 6                | 0              | C | 2.275124                | 0.707788  | 0.018020  |
| 3                | 8                | 0              | O | 0.670029                | -0.727558 | -0.173250 |
| 4                | 6                | 0              | C | -0.110279               | -0.767682 | -1.367202 |
| 5                | 7                | 0              | N | -1.202656               | -1.195554 | -0.577454 |
| 6                | 16               | 0              | S | -2.127224               | 0.091506  | 0.015358  |
| 7                | 8                | 0              | O | -3.425962               | 0.052092  | -0.675771 |
| 8                | 8                | 0              | O | -1.390685               | 1.374296  | 0.046403  |
| 9                | 6                | 0              | C | 3.162402                | -1.676110 | 0.504735  |
| 10               | 6                | 0              | C | 2.108242                | 1.135253  | 1.444422  |
| 11               | 6                | 0              | C | 1.996761                | 1.772405  | -1.002056 |
| 12               | 6                | 0              | C | -2.382952               | -0.447326 | 1.712735  |
| 13               | 1                | 0              | H | 2.795759                | -0.724461 | -1.438015 |
| 14               | 1                | 0              | H | 0.217564                | -1.549621 | -2.061656 |
| 15               | 1                | 0              | H | -0.173772               | 0.209266  | -1.859542 |
| 16               | 1                | 0              | H | 2.799927                | -2.639094 | 0.132142  |
| 17               | 1                | 0              | H | 2.843292                | -1.574278 | 1.543777  |
| 18               | 1                | 0              | H | 4.260882                | -1.707271 | 0.485030  |
| 19               | 1                | 0              | H | 2.807016                | 1.950192  | 1.677547  |
| 20               | 1                | 0              | H | 2.268729                | 0.328664  | 2.161098  |
| 21               | 1                | 0              | H | 1.092811                | 1.528172  | 1.577104  |
| 22               | 1                | 0              | H | 0.962449                | 2.123961  | -0.895390 |
| 23               | 1                | 0              | H | 2.153616                | 1.424012  | -2.027065 |
| 24               | 1                | 0              | H | 2.651116                | 2.637751  | -0.829448 |
| 25               | 1                | 0              | H | -3.055031               | 0.274796  | 2.181917  |
| 26               | 1                | 0              | H | -1.418674               | -0.470451 | 2.222056  |
| 27               | 1                | 0              | H | -2.836186               | -1.439455 | 1.695393  |

## B3LYP/6-31G\* (Onsager)

SCF Done: E(RB+HF-LYP) = -954.189597504

|                                            |                             |
|--------------------------------------------|-----------------------------|
| Zero-point correction=                     | 0.221137 (Hartree/Particle) |
| Thermal correction to Energy=              | 0.236399                    |
| Thermal correction to Enthalpy=            | 0.237343                    |
| Thermal correction to Gibbs Free Energy=   | 0.178108                    |
| Sum of electronic and zero-point Energies= | -953.968461                 |

Sum of electronic and thermal Energies= -953.953199  
 Sum of electronic and thermal Enthalpies= -953.952255  
 Sum of electronic and thermal Free Energies= -954.011489

|       | E (Thermal)<br>KCAL/MOL | CV<br>CAL/MOL-KELVIN | S<br>CAL/MOL-KELVIN |
|-------|-------------------------|----------------------|---------------------|
| TOTAL | 148.342                 | 53.712               | 124.670             |

Standard orientation:

| Center<br>Number | Atomic<br>Number | Atomic<br>Type |   | Coordinates (Angstroms) |           |           |
|------------------|------------------|----------------|---|-------------------------|-----------|-----------|
|                  |                  |                |   | X                       | Y         | Z         |
| 1                | 6                | 0              | C | 2.671026                | -0.606148 | -0.349722 |
| 2                | 6                | 0              | C | 2.318662                | 0.692331  | -0.039708 |
| 3                | 8                | 0              | O | 0.583211                | -0.712825 | -0.126561 |
| 4                | 6                | 0              | C | -0.144278               | -0.849428 | -1.330951 |
| 5                | 7                | 0              | N | -1.235019               | -1.230821 | -0.501037 |
| 6                | 16               | 0              | S | -2.173830               | 0.081900  | 0.018780  |
| 7                | 8                | 0              | O | -3.560766               | -0.218105 | -0.379491 |
| 8                | 8                | 0              | O | -1.606187               | 1.395138  | -0.349221 |
| 9                | 6                | 0              | C | 3.146817                | -1.677541 | 0.580379  |
| 10               | 6                | 0              | C | 2.222050                | 1.216602  | 1.361729  |
| 11               | 6                | 0              | C | 2.041292                | 1.697314  | -1.120032 |
| 12               | 6                | 0              | C | -2.063211               | -0.096142 | 1.807117  |
| 13               | 1                | 0              | H | 2.770503                | -0.837659 | -1.409807 |
| 14               | 1                | 0              | H | 0.195958                | -1.682021 | -1.956940 |
| 15               | 1                | 0              | H | -0.230510               | 0.085290  | -1.895117 |
| 16               | 1                | 0              | H | 2.733152                | -2.646383 | 0.282982  |
| 17               | 1                | 0              | H | 2.872734                | -1.494757 | 1.621121  |
| 18               | 1                | 0              | H | 4.241134                | -1.760822 | 0.527337  |
| 19               | 1                | 0              | H | 3.033544                | 1.933837  | 1.547329  |
| 20               | 1                | 0              | H | 2.282374                | 0.436060  | 2.121448  |
| 21               | 1                | 0              | H | 1.278713                | 1.761283  | 1.487395  |
| 22               | 1                | 0              | H | 1.011931                | 2.068487  | -1.029524 |
| 23               | 1                | 0              | H | 2.184788                | 1.284106  | -2.122755 |
| 24               | 1                | 0              | H | 2.707498                | 2.563209  | -1.008881 |
| 25               | 1                | 0              | H | -2.723664               | 0.653769  | 2.248906  |
| 26               | 1                | 0              | H | -1.028397               | 0.068212  | 2.108264  |
| 27               | 1                | 0              | H | -2.387562               | -1.102853 | 2.074321  |

### B3LYP/6-311+G\*\* (gas phase)

E(RB+HF-LYP) = -954.376511508

Zero-point correction= 0.218433 (Hartree/Particle)  
 Thermal correction to Energy= 0.233864  
 Thermal correction to Enthalpy= 0.234808  
 Thermal correction to Gibbs Free Energy= 0.174905  
 Sum of electronic and zero-point Energies= -954.158078  
 Sum of electronic and thermal Energies= -954.142648  
 Sum of electronic and thermal Enthalpies= -954.141704  
 Sum of electronic and thermal Free Energies= -954.201607

|       | E (Thermal)<br>KCAL/MOL | CV<br>CAL/MOL-KELVIN | S<br>CAL/MOL-KELVIN |
|-------|-------------------------|----------------------|---------------------|
| TOTAL | 146.752                 | 54.218               | 126.077             |

Standard orientation:

| Center<br>Number | Atomic<br>Number | Atomic<br>Type | Coordinates (Angstroms) |   |   |
|------------------|------------------|----------------|-------------------------|---|---|
|                  |                  |                | X                       | Y | Z |

|    |    |   |           |           |           |
|----|----|---|-----------|-----------|-----------|
| 1  | 6  | 0 | 2.690185  | -0.573978 | -0.365235 |
| 2  | 6  | 0 | 2.307169  | 0.704696  | -0.004588 |
| 3  | 8  | 0 | 0.665498  | -0.736147 | -0.144862 |
| 4  | 6  | 0 | -0.125347 | -0.822596 | -1.327784 |
| 5  | 7  | 0 | -1.211575 | -1.209240 | -0.510274 |
| 6  | 16 | 0 | -2.153359 | 0.095753  | 0.015637  |
| 7  | 8  | 0 | -3.429641 | 0.021438  | -0.704559 |
| 8  | 8  | 0 | -1.424739 | 1.377647  | 0.005156  |
| 9  | 6  | 0 | 3.206312  | -1.655930 | 0.529105  |
| 10 | 6  | 0 | 2.178639  | 1.164924  | 1.412743  |
| 11 | 6  | 0 | 2.009309  | 1.743449  | -1.041864 |
| 12 | 6  | 0 | -2.449069 | -0.377934 | 1.723498  |
| 13 | 1  | 0 | 2.805794  | -0.757674 | -1.430679 |
| 14 | 1  | 0 | 0.189201  | -1.632713 | -1.991073 |
| 15 | 1  | 0 | -0.194343 | 0.134730  | -1.853102 |
| 16 | 1  | 0 | 2.867355  | -2.631434 | 0.174254  |
| 17 | 1  | 0 | 2.882967  | -1.541036 | 1.562758  |
| 18 | 1  | 0 | 4.303188  | -1.665147 | 0.512456  |
| 19 | 1  | 0 | 2.937284  | 1.928338  | 1.623930  |
| 20 | 1  | 0 | 2.288021  | 0.362664  | 2.139587  |
| 21 | 1  | 0 | 1.200472  | 1.635721  | 1.548929  |
| 22 | 1  | 0 | 0.977213  | 2.093248  | -0.928813 |
| 23 | 1  | 0 | 2.156482  | 1.375347  | -2.058454 |
| 24 | 1  | 0 | 2.659514  | 2.613302  | -0.893269 |
| 25 | 1  | 0 | -3.132088 | 0.362830  | 2.138533  |
| 26 | 1  | 0 | -1.497764 | -0.376899 | 2.251362  |
| 27 | 1  | 0 | -2.900651 | -1.367945 | 1.724182  |

## BP86/6-31G\* (gas phase)

E(RB-P86) = -954.232792909

|                                              |                             |
|----------------------------------------------|-----------------------------|
| Zero-point correction=                       | 0.214126 (Hartree/Particle) |
| Thermal correction to Energy=                | 0.229789                    |
| Thermal correction to Enthalpy=              | 0.230733                    |
| Thermal correction to Gibbs Free Energy=     | 0.170489                    |
| Sum of electronic and zero-point Energies=   | -954.018667                 |
| Sum of electronic and thermal Energies=      | -954.003004                 |
| Sum of electronic and thermal Enthalpies=    | -954.002060                 |
| Sum of electronic and thermal Free Energies= | -954.062304                 |

|       | E (Thermal) | CV             | S              |
|-------|-------------|----------------|----------------|
|       | KCAL/MOL    | CAL/MOL-KELVIN | CAL/MOL-KELVIN |
| TOTAL | 144.195     | 55.210         | 126.794        |

Standard orientation:

| Center Number | Atomic Number | Atomic Type | Coordinates (Angstroms) |           |           |
|---------------|---------------|-------------|-------------------------|-----------|-----------|
|               |               |             | X                       | Y         | Z         |
| 1             | 6             | 0           | 2.710752                | -0.564635 | -0.374551 |
| 2             | 6             | 0           | 2.298213                | 0.708754  | 0.014317  |
| 3             | 8             | 0           | 0.655406                | -0.733134 | -0.163539 |
| 4             | 6             | 0           | -0.108350               | -0.756597 | -1.364560 |
| 5             | 7             | 0           | -1.197727               | -1.216177 | -0.553388 |
| 6             | 16            | 0           | -2.147742               | 0.095884  | 0.018118  |
| 7             | 8             | 0           | -3.435794               | 0.025561  | -0.724440 |
| 8             | 8             | 0           | -1.420186               | 1.399232  | 0.068198  |
| 9             | 6             | 0           | 3.218222                | -1.672073 | 0.501089  |
| 10            | 6             | 0           | 2.139569                | 1.137104  | 1.446197  |
| 11            | 6             | 0           | 2.000201                | 1.771004  | -1.008906 |

|    |   |   |           |           |           |
|----|---|---|-----------|-----------|-----------|
| 12 | 6 | 0 | -2.442217 | -0.451367 | 1.719162  |
| 13 | 1 | 0 | 2.833426  | -0.725588 | -1.455166 |
| 14 | 1 | 0 | 0.212881  | -1.533403 | -2.084235 |
| 15 | 1 | 0 | -0.196508 | 0.235727  | -1.847999 |
| 16 | 1 | 0 | 2.842492  | -2.645214 | 0.142003  |
| 17 | 1 | 0 | 2.916759  | -1.557704 | 1.553769  |
| 18 | 1 | 0 | 4.325293  | -1.713801 | 0.464790  |
| 19 | 1 | 0 | 2.853770  | 1.949704  | 1.683895  |
| 20 | 1 | 0 | 2.294677  | 0.320283  | 2.166756  |
| 21 | 1 | 0 | 1.121887  | 1.545125  | 1.587746  |
| 22 | 1 | 0 | 0.953427  | 2.113537  | -0.897858 |
| 23 | 1 | 0 | 2.157005  | 1.420498  | -2.042896 |
| 24 | 1 | 0 | 2.646751  | 2.654808  | -0.842425 |
| 25 | 1 | 0 | -3.140794 | 0.267888  | 2.173975  |
| 26 | 1 | 0 | -1.482328 | -0.461489 | 2.255302  |
| 27 | 1 | 0 | -2.884518 | -1.457671 | 1.687937  |

### MPW1K/6-31+G\* (gas phase)

E(RmPW+HF-PW91) = -954.007553840

|                                              |                             |
|----------------------------------------------|-----------------------------|
| Zero-point correction=                       | 0.227924 (Hartree/Particle) |
| Thermal correction to Energy=                | 0.242726                    |
| Thermal correction to Enthalpy=              | 0.243671                    |
| Thermal correction to Gibbs Free Energy=     | 0.185515                    |
| Sum of electronic and zero-point Energies=   | -953.779630                 |
| Sum of electronic and thermal Energies=      | -953.764827                 |
| Sum of electronic and thermal Enthalpies=    | -953.763883                 |
| Sum of electronic and thermal Free Energies= | -953.822039                 |

|       | E (Thermal) | CV             | S              |
|-------|-------------|----------------|----------------|
|       | KCAL/MOL    | CAL/MOL-KELVIN | CAL/MOL-KELVIN |
| TOTAL | 152.313     | 52.188         | 122.399        |

C,0,0.5906921147,-2.1448182089,-1.5339747512  
 C,0,0.7640095217,-2.1974436158,-0.1725103094  
 O,0,-0.0348047674,-0.3601786402,-0.8817049459  
 C,0,0.8287839458,0.7266050476,-1.1121750246  
 N,0,-0.2774913177,1.523722274,-0.8112221727  
 S,0,-0.4105104415,1.8878588673,0.800683094  
 O,0,-0.2075774599,3.3156647503,0.9492672007  
 O,0,0.3811959436,0.9920864707,1.6359099239  
 C,0,-0.5789597491,-2.6208377944,-2.3183351023  
 C,0,-0.2968641589,-2.6099038511,0.783807364  
 C,0,2.0722794224,-1.85266055,0.4490449979  
 C,0,-2.120693234,1.549643616,1.0843086045  
 H,0,1.464423721,-1.8798485898,-2.1181198882  
 H,0,1.1306184584,0.8143110102,-2.1531056839  
 H,0,1.6751456395,0.7388102972,-0.4278791419  
 H,0,-0.7650306265,-1.9510342731,-3.1552549125  
 H,0,-1.4874421386,-2.677191725,-1.7275209513  
 H,0,-0.3772163254,-3.6119409322,-2.7299304707  
 H,0,-0.0090711102,-3.5414997454,1.2752239663  
 H,0,-1.2652449522,-2.755274978,0.3177683934  
 H,0,-0.3897739482,-1.849345314,1.5591584505  
 H,0,1.9406992935,-1.0290941372,1.1528600788  
 H,0,2.8260051272,-1.5806791772,-0.2863817079  
 H,0,2.445438919,-2.7051618614,1.0196739379  
 H,0,-2.3378498978,1.8343653251,2.109877069  
 H,0,-2.3002420295,0.4914359501,0.9298100274  
 H,0,-2.7058507475,2.146261849,0.3926744356



## MPW1K/6-31+G\* (Onsager)

E(RmPW+HF-PW91) = -954.014252869

|                                              |                             |
|----------------------------------------------|-----------------------------|
| Zero-point correction=                       | 0.227679 (Hartree/Particle) |
| Thermal correction to Energy=                | 0.242643                    |
| Thermal correction to Enthalpy=              | 0.243587                    |
| Thermal correction to Gibbs Free Energy=     | 0.184617                    |
| Sum of electronic and zero-point Energies=   | -953.786574                 |
| Sum of electronic and thermal Energies=      | -953.771610                 |
| Sum of electronic and thermal Enthalpies=    | -953.770666                 |
| Sum of electronic and thermal Free Energies= | -953.829636                 |

|       | E (Thermal)<br>KCAL/MOL | CV<br>CAL/MOL-KELVIN | S<br>CAL/MOL-KELVIN |
|-------|-------------------------|----------------------|---------------------|
| TOTAL | 152.261                 | 52.340               | 124.113             |

C,0,0.5558146894,-2.1941560092,-1.481077995  
C,0,0.7426912325,-2.280288347,-0.1283936199  
O,0,-0.0004957228,-0.3080378328,-0.8142972241  
C,0,0.9356330582,0.7002634086,-1.043784911  
N,0,-0.1714198206,1.5415264784,-0.844815682  
S,0,-0.4236575088,1.9772895307,0.7359023793  
O,0,-0.5597961561,3.4243579233,0.754941037  
O,0,0.5349042321,1.365738853,1.6454247745  
C,0,-0.6405857169,-2.6046213011,-2.2595182826  
C,0,-0.3176284753,-2.7012922751,0.8259177193  
C,0,2.0752850214,-2.0071384509,0.4790286684  
C,0,-2.0175875594,1.2855169454,1.060570557  
H,0,1.4304971985,-1.9478639616,-2.0722159896  
H,0,1.2987985375,0.7329090024,-2.0678970581  
H,0,1.7318304568,0.7244138039,-0.3031584817  
H,0,-0.8138734545,-1.9103778723,-3.0791849054  
H,0,-1.5435502369,-2.652394579,-1.6594364026  
H,0,-0.4757994848,-3.5903943514,-2.6987032829  
H,0,-0.10252491,-3.7080412392,1.1907109072  
H,0,-1.3100446385,-2.7118524173,0.3881937311  
H,0,-0.320040953,-2.041883512,1.6935766893  
H,0,1.9990028551,-1.2103265269,1.2207168756  
H,0,2.8227227392,-1.7352902336,-0.2628419227  
H,0,2.4301520684,-2.8962157053,1.0037109806  
H,0,-2.3096067471,1.6054688169,2.0568935661  
H,0,-1.945467983,0.2054454237,1.0060468311  
H,0,-2.7122688871,1.6629101402,0.3178586521

## B3PW91/6-31G\* (gas phase)

Filename: b3pw91

E(RB+HF-PW91) = -953.927497137

|                                              |                             |
|----------------------------------------------|-----------------------------|
| Zero-point correction=                       | 0.221702 (Hartree/Particle) |
| Thermal correction to Energy=                | 0.236925                    |
| Thermal correction to Enthalpy=              | 0.237870                    |
| Thermal correction to Gibbs Free Energy=     | 0.178453                    |
| Sum of electronic and zero-point Energies=   | -953.705795                 |
| Sum of electronic and thermal Energies=      | -953.690572                 |
| Sum of electronic and thermal Enthalpies=    | -953.689628                 |
| Sum of electronic and thermal Free Energies= | -953.749044                 |

|  | E (Thermal)<br>KCal/Mol | CV<br>Cal/Mol-Kelvin | S<br>Cal/Mol-Kelvin |
|--|-------------------------|----------------------|---------------------|
|--|-------------------------|----------------------|---------------------|

Total 148.673 53.488 125.052

C,0,0.6080337562,-2.2276342751,-1.5225311458  
 C,0,0.8049938964,-2.3185691635,-0.1550286643  
 O,0,-0.0383129584,-0.4569338809,-0.8603672334  
 C,0,0.8150315603,0.6529505471,-1.0758819184  
 N,0,-0.3036664402,1.4638534477,-0.7856417159  
 S,0,-0.4148109413,1.8506754027,0.8485986814  
 O,0,-0.1197877982,3.2826010756,0.9736986394  
 O,0,0.3128497443,0.9091573573,1.718188089  
 C,0,-0.5593939476,-2.7243781072,-2.310607948  
 C,0,-0.2422262408,-2.7722667788,0.8088438563  
 C,0,2.1212452668,-1.9576498015,0.4575399464  
 C,0,-2.1676372032,1.6205734841,1.1168599898  
 H,0,1.4763773055,-1.9369533029,-2.1141488593  
 H,0,1.1333196084,0.7555955467,-2.1199350635  
 H,0,1.6672978555,0.6749051479,-0.3861022291  
 H,0,-0.7705622984,-2.041427153,-3.1390651101  
 H,0,-1.4671197985,-2.8168603096,-1.7108802402  
 H,0,-0.3335331936,-3.7086567351,-2.7438232854  
 H,0,0.0920437101,-3.6806922552,1.3280318884  
 H,0,-1.2047193129,-2.9798584938,0.3389144187  
 H,0,-0.3827792393,-1.9956210304,1.5703456525  
 H,0,1.9829966357,-1.1407176117,1.177700314  
 H,0,2.8640573654,-1.6570319639,-0.2871615871  
 H,0,2.5232515112,-2.8135333705,1.0165503213  
 H,0,-2.3819674522,1.9362582794,2.1405779421  
 H,0,-2.4107100007,0.5664560335,0.9764101167  
 H,0,-2.7112913905,2.2414229113,0.4030861446

### BB1K/6-31G\* (gas phase)

Filename: bb95

E(RB+HF-B95) = -953.922255508

|                                              |                             |
|----------------------------------------------|-----------------------------|
| Zero-point correction=                       | 0.228031 (Hartree/Particle) |
| Thermal correction to Energy=                | 0.242355                    |
| Thermal correction to Enthalpy=              | 0.243299                    |
| Thermal correction to Gibbs Free Energy=     | 0.187477                    |
| Sum of electronic and zero-point Energies=   | -953.694224                 |
| Sum of electronic and thermal Energies=      | -953.679901                 |
| Sum of electronic and thermal Enthalpies=    | -953.678957                 |
| Sum of electronic and thermal Free Energies= | -953.734778                 |

|       | E (Thermal) | CV             | S              |
|-------|-------------|----------------|----------------|
|       | KCal/Mol    | Cal/Mol-Kelvin | Cal/Mol-Kelvin |
| Total | 152.080     | 51.933         | 117.487        |

C,0,0.5781044987,-2.2098083677,-1.5014813195  
 C,0,0.7498153909,-2.2050487681,-0.1376892292  
 O,0,-0.0000234185,-0.4122375123,-0.8959065392  
 C,0,0.8943213686,0.6585531678,-1.0947727115  
 N,0,-0.1913563357,1.4861678769,-0.7995770221  
 S,0,-0.3702542135,1.7335620198,0.8264702393  
 O,0,-0.2267720556,3.1498311302,1.088823207  
 O,0,0.4334271641,0.8008784441,1.609624528  
 C,0,-0.6071004651,-2.6765910202,-2.2636003647  
 C,0,-0.3209033931,-2.5251932951,0.839636103  
 C,0,2.068134564,-1.8723590655,0.4642810748  
 C,0,-2.0689351341,1.3046770842,1.0478972624  
 H,0,1.4593558089,-1.9927400054,-2.093377058  
 H,0,1.2162451743,0.7535414197,-2.129082287

H,0,1.7297267548,0.6347128971,-0.3972966992  
H,0,-0.784565184,-2.0212041361,-3.1129774748  
H,0,-1.5091413093,-2.6964036976,-1.6612043734  
H,0,-0.4342378731,-3.6810954908,-2.6534752908  
H,0,-0.0480969431,-3.4095863381,1.4171200334  
H,0,-1.2872792112,-2.6995470515,0.3796094615  
H,0,-0.4020831183,-1.6897336503,1.5362294104  
H,0,1.9504672921,-1.0346020943,1.1536978599  
H,0,2.8160725548,-1.6248858068,-0.285267151  
H,0,2.4330550425,-2.7214667035,1.044563947  
H,0,-2.3236857045,1.5036373074,2.0845366065  
H,0,-2.1930751575,0.2532753087,0.8120551729  
H,0,-2.6682360969,1.9193313473,0.3853336143

## BPW91/6-31G\* (gas phase)

Filename: bpw91

E(RB-PW91) = -954.134645397

|                                              |                             |
|----------------------------------------------|-----------------------------|
| Zero-point correction=                       | 0.215021 (Hartree/Particle) |
| Thermal correction to Energy=                | 0.230765                    |
| Thermal correction to Enthalpy=              | 0.231709                    |
| Thermal correction to Gibbs Free Energy=     | 0.170869                    |
| Sum of electronic and zero-point Energies=   | -953.919625                 |
| Sum of electronic and thermal Energies=      | -953.903880                 |
| Sum of electronic and thermal Enthalpies=    | -953.902936                 |
| Sum of electronic and thermal Free Energies= | -953.963777                 |

|       | E (Thermal) | CV             | S              |
|-------|-------------|----------------|----------------|
|       | KCal/Mol    | Cal/Mol-Kelvin | Cal/Mol-Kelvin |
| Total | 144.807     | 55.102         | 128.049        |

C,0,0.6056865935,-2.2408780201,-1.5308218534  
C,0,0.8455933805,-2.3851992829,-0.1644129064  
O,0,-0.0379012038,-0.4515036727,-0.8451553194  
C,0,0.8215908888,0.6690396971,-1.0287126071  
N,0,-0.3253207621,1.4894686142,-0.7861915991  
S,0,-0.4619397827,1.9166109481,0.8686634781  
O,0,-0.118144865,3.3620607297,0.9462878565  
O,0,0.2125029485,0.9686879277,1.8009550782  
C,0,-0.5835049979,-2.7279123932,-2.3060164657  
C,0,-0.1776361931,-2.8803423863,0.8163112541  
C,0,2.1854623957,-2.034284682,0.4207674926  
C,0,-2.2514163893,1.7506011665,1.0883791528  
H,0,1.4628996989,-1.9308866229,-2.1411835484  
H,0,1.1858216744,0.7837352393,-2.0653903631  
H,0,1.6524132506,0.7051065743,-0.3011276487  
H,0,-0.8078611837,-2.0345158702,-3.1307526667  
H,0,-1.486676177,-2.8220696742,-1.6875436416  
H,0,-0.3702425216,-3.7166030897,-2.7536170497  
H,0,0.1868636127,-3.794554373,1.3198032537  
H,0,-1.1500180964,-3.1047438282,0.3588253205  
H,0,-0.3271336158,-2.118315673,1.6003751424  
H,0,2.0716662294,-1.2430130227,1.1825695322  
H,0,2.9037502081,-1.6944529211,-0.3405416204  
H,0,2.6194145581,-2.9109796983,0.9359698268  
H,0,-2.4857064611,2.1067492262,2.1011967106  
H,0,-2.52398157,0.6941133777,0.9717027215  
H,0,-2.7532016196,2.36974671,0.3338314695

## MPW3LYP/6-31G\* (gas phase)

Filename: mpw3lyp

E(RmPW+HF-LYP) = -954.186869532

|                                              |                             |
|----------------------------------------------|-----------------------------|
| Zero-point correction=                       | 0.221411 (Hartree/Particle) |
| Thermal correction to Energy=                | 0.236516                    |
| Thermal correction to Enthalpy=              | 0.237460                    |
| Thermal correction to Gibbs Free Energy=     | 0.178832                    |
| Sum of electronic and zero-point Energies=   | -953.965458                 |
| Sum of electronic and thermal Energies=      | -953.950354                 |
| Sum of electronic and thermal Enthalpies=    | -953.949409                 |
| Sum of electronic and thermal Free Energies= | -954.008037                 |

|       | E (Thermal)<br>KCal/Mol | CV<br>Cal/Mol-Kelvin | S<br>Cal/Mol-Kelvin |
|-------|-------------------------|----------------------|---------------------|
| Total | 148.416                 | 53.532               | 123.392             |

C,0,0.6143517827,-2.2462677703,-1.5270742026  
C,0,0.789381446,-2.2944881753,-0.1528701058  
O,0,-0.0342056588,-0.4477149144,-0.9028933161  
C,0,0.8201153334,0.6741659241,-1.113272364  
N,0,-0.2803702575,1.501643719,-0.7909624479  
S,0,-0.390137932,1.8278725137,0.8651940246  
O,0,-0.1173899493,3.2615401399,1.0477150462  
O,0,0.35643773,0.8614505738,1.7004011847  
C,0,-0.552177561,-2.7499369453,-2.3186106307  
C,0,-0.2795582641,-2.7029677573,0.8132443514  
C,0,2.1037830889,-1.9318686572,0.4711992437  
C,0,-2.1466435152,1.5551373021,1.1343975824  
H,0,1.4926156487,-1.9810513332,-2.114310126  
H,0,1.1192560336,0.7894012425,-2.161067569  
H,0,1.6862646011,0.6737958452,-0.4422283883  
H,0,-0.7524719394,-2.0775187607,-3.1582887748  
H,0,-1.4642107944,-2.8286708863,-1.7239728595  
H,0,-0.3288151091,-3.7414232549,-2.7363867826  
H,0,0.0328064867,-3.6010302063,1.3629786107  
H,0,-1.2398955452,-2.9069427209,0.3377986779  
H,0,-0.4122309293,-1.8998789888,1.548561564  
H,0,1.9617656714,-1.0940295367,1.1660272932  
H,0,2.8604788308,-1.6602089583,-0.2704402564  
H,0,2.4860517626,-2.777465618,1.0587287008  
H,0,-2.3596017382,1.8239623122,2.1713613096  
H,0,-2.368681122,0.5032906263,0.9500269004  
H,0,-2.7039381003,2.1948692854,0.4489143342

## MPWB1K/6-31G\* (gas phase)

Filename: mpwb1k

E(RmPW+HF-B95) = -953.919326994

|                                              |                             |
|----------------------------------------------|-----------------------------|
| Zero-point correction=                       | 0.228640 (Hartree/Particle) |
| Thermal correction to Energy=                | 0.242928                    |
| Thermal correction to Enthalpy=              | 0.243872                    |
| Thermal correction to Gibbs Free Energy=     | 0.188136                    |
| Sum of electronic and zero-point Energies=   | -953.690687                 |
| Sum of electronic and thermal Energies=      | -953.676399                 |
| Sum of electronic and thermal Enthalpies=    | -953.675455                 |
| Sum of electronic and thermal Free Energies= | -953.731191                 |

|       | E (Thermal)<br>KCal/Mol | CV<br>Cal/Mol-Kelvin | S<br>Cal/Mol-Kelvin |
|-------|-------------------------|----------------------|---------------------|
| Total | 152.440                 | 51.800               | 117.307             |

C,0,0.5762501598,-2.2075678352,-1.4997257347  
 C,0,0.7489208444,-2.2003025628,-0.1376465374  
 O,0,0.0007987904,-0.4092468491,-0.8978319324  
 C,0,0.8974361985,0.6574373469,-1.0958081184  
 N,0,-0.1866422642,1.4840452843,-0.7983759346  
 S,0,-0.3682196084,1.7217057311,0.8261455356  
 O,0,-0.2280810713,3.1345057643,1.0983397695  
 O,0,0.4358384082,0.7863432809,1.6027834298  
 C,0,-0.6121520818,-2.6693178246,-2.2576887756  
 C,0,-0.3214111896,-2.5134743094,0.8403601849  
 C,0,2.0665989649,-1.8676111833,0.4627081196  
 C,0,-2.0637904071,1.28844704,1.0426465572  
 H,0,1.4565787689,-1.9935531181,-2.0929342156  
 H,0,1.2183887657,0.7527898463,-2.1295306353  
 H,0,1.732224421,0.6313035134,-0.398804456  
 H,0,-0.7893873652,-2.0132071232,-3.1056648342  
 H,0,-1.5115144957,-2.684435451,-1.6522898684  
 H,0,-0.4456574509,-3.6739356669,-2.6477367615  
 H,0,-0.0484482265,-3.3923606648,1.424668725  
 H,0,-1.286822182,-2.6917853268,0.3812835701  
 H,0,-0.4026379485,-1.6726959061,1.5296319752  
 H,0,1.9492376457,-1.0293339522,1.1507829314  
 H,0,2.8134695054,-1.621606392,-0.2874625781  
 H,0,2.4310640846,-2.7156750404,1.0434120606  
 H,0,-2.319641701,1.4783988383,2.0799876962  
 H,0,-2.1864094232,0.2394968017,0.7978894237  
 H,0,-2.6630111422,1.9073007588,0.3850314035

## MPW1B95/6-31G\* (gas phase)

Filename: mpwb95

E(RmPW+HF-B95) = -953.954312502

|                                              |                             |
|----------------------------------------------|-----------------------------|
| Zero-point correction=                       | 0.224836 (Hartree/Particle) |
| Thermal correction to Energy=                | 0.239323                    |
| Thermal correction to Enthalpy=              | 0.240267                    |
| Thermal correction to Gibbs Free Energy=     | 0.184198                    |
| Sum of electronic and zero-point Energies=   | -953.729477                 |
| Sum of electronic and thermal Energies=      | -953.714990                 |
| Sum of electronic and thermal Enthalpies=    | -953.714046                 |
| Sum of electronic and thermal Free Energies= | -953.770115                 |

|       | E (Thermal) | CV             | S              |
|-------|-------------|----------------|----------------|
|       | KCal/Mol    | Cal/Mol-Kelvin | Cal/Mol-Kelvin |
| Total | 150.177     | 52.610         | 118.008        |

C,0,0.5765828929,-2.2164203646,-1.5073950707  
 C,0,0.7480894467,-2.2094748257,-0.1386292821  
 O,0,-0.0032273501,-0.4088627915,-0.9036676698  
 C,0,0.8942933024,0.6645719751,-1.1015952582  
 N,0,-0.1911780931,1.5037166485,-0.8041669942  
 S,0,-0.3625269648,1.7439934525,0.8361662583  
 O,0,-0.2210921687,3.1685090074,1.0970973293  
 O,0,0.4480240124,0.8067340597,1.6209608999  
 C,0,-0.6091253505,-2.6872953929,-2.2704029317  
 C,0,-0.3258640657,-2.5304600437,0.8388394788  
 C,0,2.0674872576,-1.8728897623,0.4646689165  
 C,0,-2.0676514609,1.3069540763,1.0595754905  
 H,0,1.4607164934,-1.9983282644,-2.1004881072  
 H,0,1.2170813263,0.7646129223,-2.1392125382  
 H,0,1.7348442962,0.6387439884,-0.4042463827  
 H,0,-0.7873797422,-2.0328965467,-3.1243377594

H,0,-1.5142798285,-2.7072673405,-1.6669124397  
H,0,-0.4348411585,-3.6955449165,-2.6592080675  
H,0,-0.05669219,-3.4206887487,1.4152104307  
H,0,-1.2958141962,-2.6994280319,0.3766931689  
H,0,-0.4045377293,-1.695642727,1.5414065664  
H,0,1.947699714,-1.0263759202,1.1484926031  
H,0,2.8196162871,-1.6305376469,-0.2868813271  
H,0,2.4323823383,-2.7184390901,1.0560542041  
H,0,-2.3217525241,1.5011761937,2.1004113907  
H,0,-2.1870630475,0.2530871536,0.8178518897  
H,0,-2.6708114972,1.9241179361,0.3978862019

## MPWLYP1M/6-31G\* (gas phase)

Filename: mpwlyp

E(RmPW+HF-LYP) = -953.954553874

|                                              |                             |
|----------------------------------------------|-----------------------------|
| Zero-point correction=                       | 0.215963 (Hartree/Particle) |
| Thermal correction to Energy=                | 0.231465                    |
| Thermal correction to Enthalpy=              | 0.232409                    |
| Thermal correction to Gibbs Free Energy=     | 0.172795                    |
| Sum of electronic and zero-point Energies=   | -953.738591                 |
| Sum of electronic and thermal Energies=      | -953.723089                 |
| Sum of electronic and thermal Enthalpies=    | -953.722145                 |
| Sum of electronic and thermal Free Energies= | -953.781759                 |

|       | E (Thermal) | CV             | S              |
|-------|-------------|----------------|----------------|
|       | KCal/Mol    | Cal/Mol-Kelvin | Cal/Mol-Kelvin |
| Total | 145.246     | 54.840         | 125.469        |

C,0,0.6265022616,-2.2689768125,-1.5434700706  
C,0,0.8038276067,-2.3175248096,-0.1593865356  
O,0,-0.0403625209,-0.4586962853,-0.9172245399  
C,0,0.8053535564,0.6853532802,-1.1159871313  
N,0,-0.3064862428,1.522616616,-0.7927630384  
S,0,-0.3985877864,1.8512876749,0.8918543824  
O,0,-0.0782738268,3.29367544,1.0656514032  
O,0,0.3196812404,0.854671228,1.7445457897  
C,0,-0.5394579288,-2.7887265719,-2.3381725072  
C,0,-0.2670838713,-2.739047274,0.810491267  
C,0,2.1242419624,-1.9477471201,0.4654721624  
C,0,-2.184938409,1.6309987924,1.1574012925  
H,0,1.5075152456,-1.9968940453,-2.1336693772  
H,0,1.1088922468,0.8168406643,-2.1675684008  
H,0,1.6777872364,0.6895650106,-0.4422208771  
H,0,-0.7415018232,-2.1231435313,-3.1899164198  
H,0,-1.4578895089,-2.8687359923,-1.743323055  
H,0,-0.308150534,-3.7882617531,-2.7484372061  
H,0,0.0517396058,-3.6420871131,1.3601815416  
H,0,-1.2311243894,-2.9485994186,0.3322226605  
H,0,-0.4072932317,-1.9369217343,1.5536458419  
H,0,1.9805954858,-1.1093230378,1.1679331732  
H,0,2.8811834579,-1.6668914959,-0.2805445974  
H,0,2.516481672,-2.7966397712,1.0526352619  
H,0,-2.3928364438,1.9102122977,2.1981517911  
H,0,-2.4362450001,0.5800925477,0.9734507792  
H,0,-2.7205900608,2.2885682146,0.4632174098

## PBE1KCIS/6-31G\* (gas phase)

Filename: pbelkcis

E(RPBE+HF-KCIS) = -953.412515317

|                                              |                             |
|----------------------------------------------|-----------------------------|
| Zero-point correction=                       | 0.221768 (Hartree/Particle) |
| Thermal correction to Energy=                | 0.236757                    |
| Thermal correction to Enthalpy=              | 0.237701                    |
| Thermal correction to Gibbs Free Energy=     | 0.179457                    |
| Sum of electronic and zero-point Energies=   | -953.190748                 |
| Sum of electronic and thermal Energies=      | -953.175758                 |
| Sum of electronic and thermal Enthalpies=    | -953.174814                 |
| Sum of electronic and thermal Free Energies= | -953.233059                 |

C,0,0.6021494834,-2.2235872581,-1.5202425972  
C,0,0.7913759503,-2.2966831915,-0.1495726014  
O,0,-0.0320845449,-0.4462425808,-0.8841682596  
C,0,0.8251313108,0.6602270936,-1.0951937947  
N,0,-0.2814522849,1.4788387953,-0.7914395935  
S,0,-0.3986800079,1.8265329489,0.8497871331  
O,0,-0.134174756,3.2606648373,1.0085172066  
O,0,0.3479656451,0.8802650709,1.6997370932  
C,0,-0.5625167068,-2.7207018229,-2.3070839632  
C,0,-0.2662641787,-2.7161897657,0.8144434306  
C,0,2.1053405896,-1.942265279,0.4647019008  
C,0,-2.1410982712,1.5511254349,1.1154056085  
H,0,1.4783725275,-1.951407031,-2.1099748584  
H,0,1.1374616773,0.7700743339,-2.1415556322  
H,0,1.685853287,0.6689551604,-0.4140826636  
H,0,-0.7693704112,-2.0431212261,-3.1414187832  
H,0,-1.4735410009,-2.8060858989,-1.7107241591  
H,0,-0.3405167871,-3.7086439429,-2.7339673532  
H,0,0.0551031344,-3.6114308407,1.3636808367  
H,0,-1.2276484538,-2.9285177535,0.3438063709  
H,0,-0.4047297049,-1.9162868196,1.5533078065  
H,0,1.970606068,-1.111836553,1.1710496149  
H,0,2.8582144085,-1.6623544894,-0.278122536  
H,0,2.4929052045,-2.7925828924,1.0422022323  
H,0,-2.3619104887,1.8377517257,2.146670104  
H,0,-2.3606375472,0.4946848974,0.9509794211  
H,0,-2.7028741419,2.1744822961,0.4174290363

## PBE1W/6-31G\* (gas phase)

Filename: pbepbe

E(RPBE+HF-PBE) = -1028.17773542

|                                              |                             |
|----------------------------------------------|-----------------------------|
| Zero-point correction=                       | 0.333271 (Hartree/Particle) |
| Thermal correction to Energy=                | 0.344838                    |
| Thermal correction to Enthalpy=              | 0.345782                    |
| Thermal correction to Gibbs Free Energy=     | 0.295402                    |
| Sum of electronic and zero-point Energies=   | -1027.844464                |
| Sum of electronic and thermal Energies=      | -1027.832898                |
| Sum of electronic and thermal Enthalpies=    | -1027.831954                |
| Sum of electronic and thermal Free Energies= | -1027.882333                |

C,0,-0.5495717198,-2.2810503943,-1.944573432  
C,0,0.4827945884,-1.8961950584,-1.2818085014  
C,0,0.631117475,-1.9026364142,-0.1092310317  
C,0,1.7603333384,-1.5892442175,0.4241420107  
C,0,-0.2928858059,-2.2084912098,0.7313323773  
O,0,-0.0484154548,-0.3237818637,-0.7054581402  
C,0,0.7305409413,0.544534958,-0.9550470196  
N,0,-0.2180942745,1.2097410158,-0.6438483017  
S,0,-0.3980637822,1.5079763982,0.7001455925

C,0,-1.821712688,1.0688136348,0.960140672  
 O,0,-0.3413009743,2.7483811932,0.8761792532  
 O,0,0.3673183582,0.7915728905,1.4047072492  
 H,0,1.2208837981,-1.6859890225,-1.7860316994  
 H,0,0.9611083301,0.5929068723,-1.8463572069  
 H,0,1.4648239862,0.5576725102,-0.397441278  
 H,0,-0.7455714937,-1.6735250429,-2.6070181366  
 H,0,-1.2921925387,-2.3741741143,-1.4142088899  
 H,0,-0.3817446379,-3.0906659174,-2.3507867409  
 H,0,-0.0477283795,-2.9579472906,1.2072778056  
 H,0,-1.1045565378,-2.3673087832,0.3345484765  
 H,0,-0.3814187472,-1.5152835445,1.3316817533  
 H,0,1.6375299514,-0.8720592545,0.9916237643  
 H,0,2.4015591761,-1.3799672002,-0.1998931796  
 H,0,2.0701778921,-2.2924599297,0.932223857  
 H,0,-2.0073687981,1.262392996,1.8392442013  
 H,0,-1.8932743758,0.1674286586,0.804038103  
 H,0,-2.3794676275,1.5425831299,0.4053414421

### PBELYP1W/6-31G\* (gas phase)

Filename: pbev5lyp

E(RPBE+HF-V5LYP) = -1007.70225710

|                                              |                             |
|----------------------------------------------|-----------------------------|
| Zero-point correction=                       | 0.308074 (Hartree/Particle) |
| Thermal correction to Energy=                | 0.320118                    |
| Thermal correction to Enthalpy=              | 0.321062                    |
| Thermal correction to Gibbs Free Energy=     | 0.269660                    |
| Sum of electronic and zero-point Energies=   | -1007.394183                |
| Sum of electronic and thermal Energies=      | -1007.382139                |
| Sum of electronic and thermal Enthalpies=    | -1007.381195                |
| Sum of electronic and thermal Free Energies= | -1007.432597                |

|       | E (Thermal) | CV             | S              |
|-------|-------------|----------------|----------------|
|       | KCal/Mol    | Cal/Mol-Kelvin | Cal/Mol-Kelvin |
| Total | 200.877     | 42.577         | 108.185        |

C,0,-0.5658292946,-2.3511176753,-2.0176643383  
 C,0,0.5035883165,-1.9544957241,-1.3247668005  
 C,0,0.6470527924,-1.9532079148,-0.1104101761  
 C,0,1.8158719348,-1.6300952056,0.4503898246  
 C,0,-0.3197584743,-2.2551042583,0.7580646052  
 O,0,-0.0531013983,-0.3029140587,-0.7469153337  
 C,0,0.7574677674,0.609155671,-0.9865701775  
 N,0,-0.2115786199,1.3167095489,-0.6616752049  
 S,0,-0.396810137,1.5910881,0.7429001301  
 C,0,-1.8767773715,1.1330704011,1.000696635  
 O,0,-0.3366862244,2.8674858618,0.9520554558  
 O,0,0.3902439651,0.8307955788,1.4535073715  
 H,0,1.2743966278,-1.7441750833,-1.8440270139  
 H,0,0.9971424886,0.6683186025,-1.9099865141  
 H,0,1.5175705082,0.5978963715,-0.40689781  
 H,0,-0.7575085837,-1.7233153174,-2.7129061916  
 H,0,-1.3426996605,-2.4335891492,-1.471346289  
 H,0,-0.3975060878,-3.1985927339,-2.4306565399  
 H,0,-0.070703085,-3.027149494,1.2667339533  
 H,0,-1.1598376053,-2.4244366594,0.3406700788  
 H,0,-0.4148321891,-1.5242673792,1.3697785203  
 H,0,1.6886704356,-0.8812620106,1.0354554182  
 H,0,2.4857566866,-1.4190493637,-0.1970910136  
 H,0,2.1315901122,-2.3610330105,0.9825895318  
 H,0,-2.0747318245,1.3193065431,1.9161594309  
 H,0,-1.9519988061,0.1992715641,0.8230646908



H,0,-2.4541722733,1.6339317953,0.4297707567

## RHF/6-31G\* (gas phase)

Filename: rhf

E(RHF) = -950.075192665

|                                              |                             |
|----------------------------------------------|-----------------------------|
| Zero-point correction=                       | 0.237829 (Hartree/Particle) |
| Thermal correction to Energy=                | 0.252037                    |
| Thermal correction to Enthalpy=              | 0.252981                    |
| Thermal correction to Gibbs Free Energy=     | 0.196231                    |
| Sum of electronic and zero-point Energies=   | -949.837363                 |
| Sum of electronic and thermal Energies=      | -949.823156                 |
| Sum of electronic and thermal Enthalpies=    | -949.822212                 |
| Sum of electronic and thermal Free Energies= | -949.878962                 |

C,0,0.6327820007,-2.2421735355,-1.5086662073  
C,0,0.7924151815,-2.3000878997,-0.1537803862  
O,0,-0.0277609315,-0.4678318814,-0.831717522  
C,0,0.7933075631,0.6804756706,-1.1003591928  
N,0,-0.3088394818,1.4312306544,-0.7610153897  
S,0,-0.4167769801,1.8546945071,0.8165579997  
O,0,-0.1701985261,3.2633828985,0.9493215597  
O,0,0.3516462604,0.9663884909,1.6596037345  
C,0,-0.535703774,-2.7123852903,-2.3244287802  
C,0,-0.2740092531,-2.7316893466,0.8097686392  
C,0,2.1110159509,-1.9627164507,0.4846677343  
C,0,-2.1322982924,1.5796148649,1.1391571074  
H,0,1.5056040398,-1.9772435186,-2.0816233645  
H,0,1.0438615376,0.7360003085,-2.1481557408  
H,0,1.6605871856,0.6935259945,-0.4601866603  
H,0,-0.7075756856,-2.0277338629,-3.1465358991  
H,0,-1.4484457569,-2.7792776278,-1.7511882711  
H,0,-0.3238756119,-3.6907630924,-2.7483234979  
H,0,0.030992181,-3.6548284217,1.2958267296  
H,0,-1.2330512313,-2.8930268081,0.3418901602  
H,0,-0.382040683,-1.9733422102,1.5770284705  
H,0,1.978686929,-1.1634799911,1.2054059696  
H,0,2.8573525909,-1.6686463778,-0.2429111247  
H,0,2.4843493876,-2.8314602713,1.0203922243  
H,0,-2.3232700287,1.8968138431,2.155482978  
H,0,-2.3523994804,0.5291800272,1.0208306123  
H,0,-2.7133750915,2.1710443262,0.4471291177

## TPSS1KCIS/6-31G\* (gas phase)

Filename: tpsskcis

E(RTPSS+HF-KCIS) = -954.215717575

|                                              |                             |
|----------------------------------------------|-----------------------------|
| Zero-point correction=                       | 0.221923 (Hartree/Particle) |
| Thermal correction to Energy=                | 0.237091                    |
| Thermal correction to Enthalpy=              | 0.238035                    |
| Thermal correction to Gibbs Free Energy=     | 0.179432                    |
| Sum of electronic and zero-point Energies=   | -953.993794                 |
| Sum of electronic and thermal Energies=      | -953.978626                 |
| Sum of electronic and thermal Enthalpies=    | -953.977682                 |
| Sum of electronic and thermal Free Energies= | -954.036286                 |

|       | E (Thermal) | CV             | S              |
|-------|-------------|----------------|----------------|
|       | KCal/Mol    | Cal/Mol-Kelvin | Cal/Mol-Kelvin |
| Total | 148.777     | 53.669         | 123.342        |

C,0,0.603844396,-2.2332901752,-1.5246925275  
 C,0,0.7920951482,-2.2989093322,-0.1505608931  
 O,0,-0.0189519369,-0.4537099282,-0.8732364736  
 C,0,0.8380015759,0.669853831,-1.0853789112  
 N,0,-0.280106417,1.4883324907,-0.7969037868  
 S,0,-0.4027365569,1.8492093989,0.8497877674  
 O,0,-0.1574753091,3.294660416,0.9949671048  
 O,0,0.3569777186,0.9149971243,1.7115460029  
 C,0,-0.5706746943,-2.726220985,-2.3103117533  
 C,0,-0.2680778779,-2.7236492887,0.8182903469  
 C,0,2.1158029251,-1.9498821969,0.4618535033  
 C,0,-2.1537259729,1.5540612581,1.1137909557  
 H,0,1.4758018014,-1.9616664758,-2.1161531875  
 H,0,1.1539403515,0.7692933583,-2.127464696  
 H,0,1.6859060235,0.6844606745,-0.3944246435  
 H,0,-0.7740539135,-2.0481001622,-3.1425415519  
 H,0,-1.4762589345,-2.8066105346,-1.7085790245  
 H,0,-0.3521940835,-3.7143762103,-2.7348033928  
 H,0,0.0423689897,-3.6407771063,1.3340889561  
 H,0,-1.2344093449,-2.9040141552,0.3482720904  
 H,0,-0.3847415476,-1.9443704883,1.5784645537  
 H,0,1.9877046183,-1.1285994811,1.1759279351  
 H,0,2.8593807614,-1.664094383,-0.2856768183  
 H,0,2.5052690068,-2.8083676403,1.0228747995  
 H,0,-2.3791026303,1.8483648156,2.1395827012  
 H,0,-2.3563084905,0.4951996901,0.9583148502  
 H,0,-2.7152956066,2.1638704859,0.4071370926

## TPSSLYP1W/6-31G\* (gas phase)

Filename: tpssv5lyp

E(RTPSS+HF-V5LYP) = -1029.05458335

|                                              |                             |
|----------------------------------------------|-----------------------------|
| Zero-point correction=                       | 0.336944 (Hartree/Particle) |
| Thermal correction to Energy=                | 0.348457                    |
| Thermal correction to Enthalpy=              | 0.349401                    |
| Thermal correction to Gibbs Free Energy=     | 0.299269                    |
| Sum of electronic and zero-point Energies=   | -1028.717639                |
| Sum of electronic and thermal Energies=      | -1028.706127                |
| Sum of electronic and thermal Enthalpies=    | -1028.705183                |
| Sum of electronic and thermal Free Energies= | -1028.755314                |

C,0,-0.5235887021,-2.4372222037,-1.9664691664  
 C,0,0.5236793454,-2.0460871262,-1.3196137505  
 C,0,0.6747607063,-2.0141786346,-0.1490654144  
 C,0,-0.2496703078,-2.291957573,0.7093522815  
 C,0,1.8112633355,-1.6838788625,0.3724849954  
 O,0,-0.0103218738,-0.4357763866,-0.762480797  
 C,0,0.7674706804,0.4407600056,-1.030167866  
 N,0,-0.1717852172,1.1150114851,-0.7012053631  
 S,0,-0.3449191072,1.3980651782,0.6478221243  
 O,0,0.4463450475,0.6918347191,1.3349394541  
 C,0,-1.7603920908,0.9204505209,0.9250389971  
 O,0,-0.3170437951,2.6376782872,0.8362553363  
 H,0,1.2537346267,-1.8481760393,-1.8339702367  
 H,0,0.9777461466,0.4804419099,-1.9230994097  
 H,0,1.5078635957,0.4472343159,-0.4873211982  
 H,0,-0.7277185999,-1.8337517149,-2.6275620932  
 H,0,-1.2538757332,-2.5249734201,-1.421583516  
 H,0,-0.3617480972,-3.2482487993,-2.3680110267  
 H,0,-0.0017189778,-3.0234513136,1.207628636  
 H,0,-1.0593595419,-2.4638234607,0.3184175405

H,0,-0.3360896105,-1.578506838,1.2822919273  
 H,0,1.6896284479,-0.9565035461,0.9228444523  
 H,0,2.4412925963,-1.4850745469,-0.2636035821  
 H,0,2.1271703684,-2.3760807593,0.8884162348  
 H,0,-1.9385319794,1.1037921995,1.8057576079  
 H,0,-1.8107977204,0.0204788671,0.7643760571  
 H,0,-2.3351135424,1.3823887363,0.3810877752

## Epoxidation TS Isomer 9

B3LYP/6-31+G\*\* (PCM)

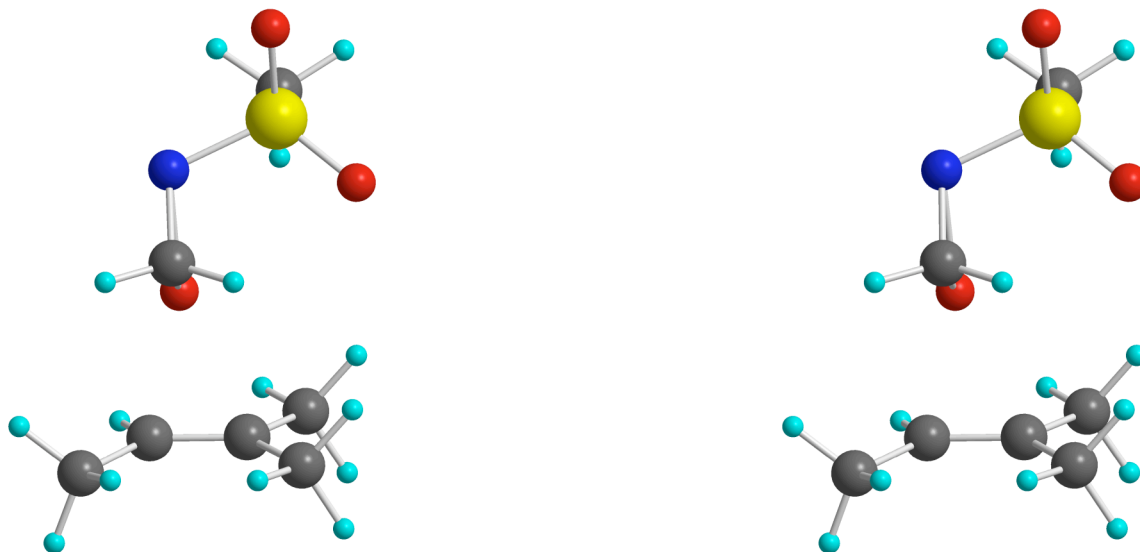

E(RB+HF-LYP) = -954.242694686

|                                              |                             |
|----------------------------------------------|-----------------------------|
| Zero-point correction=                       | 0.218830 (Hartree/Particle) |
| Thermal correction to Energy=                | 0.234271                    |
| Thermal correction to Enthalpy=              | 0.235215                    |
| Thermal correction to Gibbs Free Energy=     | 0.175540                    |
| Sum of electronic and zero-point Energies=   | -954.023864                 |
| Sum of electronic and thermal Energies=      | -954.008423                 |
| Sum of electronic and thermal Enthalpies=    | -954.007479                 |
| Sum of electronic and thermal Free Energies= | -954.067155                 |

|       | E (Thermal)<br>KCal/Mol | CV<br>Cal/Mol-Kelvin | S<br>Cal/Mol-Kelvin |
|-------|-------------------------|----------------------|---------------------|
| Total | 147.007                 | 54.328               | 125.598             |

C,0,-1.5589331789,-2.0563971534,-0.8822884575  
 C,0,-0.1979927504,-2.2519195265,-0.7709919799  
 O,0,-0.8528997265,-0.1047137925,-0.2782401148  
 C,0,-0.9363605548,0.2115714512,1.0974916206  
 N,0,-0.7723883295,1.5556032697,0.6422487042  
 S,0,0.847054168,2.0618081717,0.538706454  
 O,0,1.8215350156,0.9790674801,0.8023127472  
 O,0,0.9288376742,3.2777312846,1.3789736645  
 C,0,-2.628746475,-2.4721643075,0.0795140322  
 C,0,0.4753174715,-2.8440878898,0.4324320351  
 C,0,0.7089055972,-1.9340698065,-1.9243568997  
 C,0,0.9884783904,2.5602697654,-1.1808814677  
 H,0,-1.9200333515,-1.6864609263,-1.8412920527

H,0,-0.1309198289,-0.223452391,1.6973008265  
H,0,-1.9264755555,0.0529861023,1.5347840248  
H,0,-3.3941056178,-1.6927039357,0.1603007813  
H,0,-2.2572926721,-2.7025150235,1.0803474782  
H,0,-3.1349964855,-3.3690114435,-0.3031429971  
H,0,0.9361162635,-3.8023546598,0.1569100629  
H,0,-0.1986867562,-3.023875071,1.2712611079  
H,0,1.2906099627,-2.1916451949,0.7677310858  
H,0,1.5258078174,-1.280057346,-1.5977144072  
H,0,0.1744591048,-1.4527998609,-2.7468160356  
H,0,1.1703003209,-2.8567096144,-2.3020465432  
H,0,1.9801824966,3.0025897927,-1.2995329133  
H,0,0.2077273784,3.2934659365,-1.3874392591  
H,0,0.8731676216,1.6737106891,-1.8037724973

## B3IYP/6-31+G\*\* (gas phase)

Filename: b3BBgasPCMTs9

E(RB+HF-LYP) = -954.227312703

|                                              |                             |
|----------------------------------------------|-----------------------------|
| Zero-point correction=                       | 0.219494 (Hartree/Particle) |
| Thermal correction to Energy=                | 0.234767                    |
| Thermal correction to Enthalpy=              | 0.235711                    |
| Thermal correction to Gibbs Free Energy=     | 0.176494                    |
| Sum of electronic and zero-point Energies=   | -954.007819                 |
| Sum of electronic and thermal Energies=      | -953.992546                 |
| Sum of electronic and thermal Enthalpies=    | -953.991602                 |
| Sum of electronic and thermal Free Energies= | -954.050819                 |

|       | E (Thermal) | CV             | S              |
|-------|-------------|----------------|----------------|
|       | KCal/Mol    | Cal/Mol-Kelvin | Cal/Mol-Kelvin |
| Total | 147.318     | 54.092         | 124.633        |

C,0,-1.5766489109,-2.0953406491,-0.856735935  
C,0,-0.2009316264,-2.2472366302,-0.7410191243  
O,0,-0.9092292872,-0.2397544033,-0.3762407485  
C,0,-1.0077486955,0.2165284307,0.9775240766  
N,0,-0.7499549869,1.5264410129,0.5100773123  
S,0,0.8999897769,1.9142994725,0.4744586445  
O,0,1.7792496038,0.721772051,0.4716736734  
O,0,1.1223466798,2.9378593053,1.5121725696  
C,0,-2.6309704421,-2.5156659485,0.121585435  
C,0,0.4939404673,-2.7448855874,0.4907431683  
C,0,0.6947536422,-1.9561264521,-1.9081891081  
C,0,1.0259604254,2.7182008062,-1.1299476286  
H,0,-1.9480390014,-1.8062179535,-1.8363584228  
H,0,-0.2613312058,-0.2532649702,1.6278154389  
H,0,-2.0211257121,0.1272692749,1.3812631517  
H,0,-3.4367432554,-1.7753817023,0.154022275  
H,0,-2.2526744901,-2.661959855,1.1352571619  
H,0,-3.0825025584,-3.4615833179,-0.206637906  
H,0,1.0133853669,-3.6845920196,0.2610271609  
H,0,-0.1762005982,-2.9264478492,1.332032474  
H,0,1.2616699034,-2.0232958399,0.7946062888  
H,0,1.4606375117,-1.2309808025,-1.6099134749  
H,0,0.1419385977,-1.5583223381,-2.7621657112  
H,0,1.2133489125,-2.8719460832,-2.2220872452  
H,0,2.0461032391,3.0980323221,-1.2118158036  
H,0,0.304024755,3.534689986,-1.1559628192  
H,0,0.8154198887,1.9817757403,-1.9053859036

## B3LYP/6-31+G\*\* (Onsager)

Filename: b3BBonsts9

E(RB+HF-LYP) = -954.233576663

|                                              |                             |
|----------------------------------------------|-----------------------------|
| Zero-point correction=                       | 0.219230 (Hartree/Particle) |
| Thermal correction to Energy=                | 0.234675                    |
| Thermal correction to Enthalpy=              | 0.235619                    |
| Thermal correction to Gibbs Free Energy=     | 0.175829                    |
| Sum of electronic and zero-point Energies=   | -954.014347                 |
| Sum of electronic and thermal Energies=      | -953.998902                 |
| Sum of electronic and thermal Enthalpies=    | -953.997957                 |
| Sum of electronic and thermal Free Energies= | -954.057747                 |

|       | E (Thermal)<br>KCal/Mol | CV<br>Cal/Mol-Kelvin | S<br>Cal/Mol-Kelvin |
|-------|-------------------------|----------------------|---------------------|
| Total | 147.261                 | 54.265               | 125.839             |

C,0,-1.5437445116,-2.0092887596,-0.8866719405  
C,0,-0.1871812855,-2.2367288782,-0.7705884583  
O,0,-0.8351256877,-0.0976506749,-0.2403383883  
C,0,-0.8927531869,0.2085949155,1.1383981971  
N,0,-0.7697293756,1.5641244071,0.7111671547  
S,0,0.8373300924,2.1002580649,0.5587323493  
O,0,1.8371582996,1.054829926,0.8645844998  
O,0,0.9049082869,3.3752764287,1.3016780474  
C,0,-2.6323657605,-2.441005086,0.0458198987  
C,0,0.4605143334,-2.878231839,0.4213904878  
C,0,0.7358648006,-1.9097403401,-1.9079339856  
C,0,0.9368599656,2.4849395235,-1.1980895921  
H,0,-1.8868829349,-1.6104081053,-1.8379598964  
H,0,-0.0643501216,-0.218545103,1.7132201021  
H,0,-1.8696429437,0.0186239104,1.5936055434  
H,0,-3.3930950129,-1.6583381289,0.1334152226  
H,0,-2.2782410772,-2.7012083348,1.0454647092  
H,0,-3.1374207566,-3.3242590301,-0.367238124  
H,0,0.8801037593,-3.8499141586,0.1285461736  
H,0,-0.2230173891,-3.0485809363,1.2542620553  
H,0,1.3008314641,-2.2661433692,0.7701788345  
H,0,1.5648951309,-1.2838301073,-1.5573754369  
H,0,0.2192496828,-1.3958895164,-2.7217256152  
H,0,1.1766427304,-2.8320655742,-2.3092337825  
H,0,1.9165857052,2.9362441601,-1.3670930813  
H,0,0.1361308724,3.1854137657,-1.4361264828  
H,0,0.8251439202,1.5573868401,-1.7582914917

## MPW1K/6-31+G\*\* (PCM)

E(RmPW+HF-PW91) = -954.050074826

|                                              |                             |
|----------------------------------------------|-----------------------------|
| Zero-point correction=                       | 0.226408 (Hartree/Particle) |
| Thermal correction to Energy=                | 0.241210                    |
| Thermal correction to Enthalpy=              | 0.242154                    |
| Thermal correction to Gibbs Free Energy=     | 0.184017                    |
| Sum of electronic and zero-point Energies=   | -953.823667                 |
| Sum of electronic and thermal Energies=      | -953.808865                 |
| Sum of electronic and thermal Enthalpies=    | -953.807921                 |
| Sum of electronic and thermal Free Energies= | -953.866057                 |

|       | E (Thermal)<br>KCal/Mol | CV<br>Cal/Mol-Kelvin | S<br>Cal/Mol-Kelvin |
|-------|-------------------------|----------------------|---------------------|
| Total | 151.362                 | 52.483               | 122.359             |

C,0,-1.5392775757,-1.995454727,-0.8808751616  
 C,0,-0.1869133936,-2.1706441878,-0.7598015666  
 O,0,-0.8431869134,-0.1274709835,-0.2713709056  
 C,0,-0.9418877839,0.1604429507,1.0929476957  
 N,0,-0.7673128188,1.4831638098,0.6442660527  
 S,0,0.8137323993,1.9601298756,0.5199930833  
 O,0,1.7504014487,0.8764539589,0.7946569051  
 O,0,0.9412921693,3.1728724514,1.3172090233  
 C,0,-2.5976681175,-2.4234268568,0.070179371  
 C,0,0.4814281194,-2.7547841618,0.4346266338  
 C,0,0.7186707232,-1.8287762684,-1.8909664079  
 C,0,0.9529263671,2.4101184695,-1.1786417619  
 H,0,-1.8963790059,-1.6317794081,-1.8372359446  
 H,0,-0.145823674,-0.2822762831,1.686716449  
 H,0,-1.9316955654,-0.0030671609,1.5095264994  
 H,0,-3.3668387978,-1.6572827191,0.1518909123  
 H,0,-2.2261779903,-2.6512224393,1.0646101092  
 H,0,-3.0885386104,-3.3191599511,-0.3138980757  
 H,0,0.9564883789,-3.6963641444,0.1542657814  
 H,0,-0.1917080413,-2.9527808115,1.2617736506  
 H,0,1.2771678654,-2.0922242233,0.775294771  
 H,0,1.5147390808,-1.1702808674,-1.5448429877  
 H,0,0.1873201623,-1.3484482414,-2.7075390516  
 H,0,1.19423662,-2.7340744482,-2.2717894502  
 H,0,1.9475678148,2.8233478958,-1.3190646975  
 H,0,0.1953533831,3.1549109289,-1.3974560605  
 H,0,0.8107517558,1.5219435428,-1.7826758664

## MPW1K/6-31+G\*\* (gas phase)

Filename: mpBBgasPCMTs9  
 E(RmPW+HF-PW91) = -954.033982853

|                                              |                             |
|----------------------------------------------|-----------------------------|
| Zero-point correction=                       | 0.227071 (Hartree/Particle) |
| Thermal correction to Energy=                | 0.241709                    |
| Thermal correction to Enthalpy=              | 0.242653                    |
| Thermal correction to Gibbs Free Energy=     | 0.185285                    |
| Sum of electronic and zero-point Energies=   | -953.806911                 |
| Sum of electronic and thermal Energies=      | -953.792274                 |
| Sum of electronic and thermal Enthalpies=    | -953.791329                 |
| Sum of electronic and thermal Free Energies= | -953.848698                 |

|       | E (Thermal)<br>KCal/Mol | CV<br>Cal/Mol-Kelvin | S<br>Cal/Mol-Kelvin |
|-------|-------------------------|----------------------|---------------------|
| Total | 151.675                 | 52.276               | 120.743             |

C,0,-1.5616537571,-2.045743861,-0.8579341486  
 C,0,-0.1968756309,-2.160567029,-0.7422673349  
 O,0,-0.8997399791,-0.2148049268,-0.3534834103  
 C,0,-1.0288139544,0.1813467636,0.9929133364  
 N,0,-0.7555310921,1.4706141359,0.5296177648  
 S,0,0.8621002654,1.8252384753,0.4817544504  
 O,0,1.6920126439,0.62716925,0.5600333873  
 O,0,1.1096061145,2.8876620703,1.4367926383  
 C,0,-2.5937444152,-2.4791493485,0.1204308951  
 C,0,0.5100737811,-2.645852083,0.472824216  
 C,0,0.6860450703,-1.8280253721,-1.8929989031  
 C,0,1.0191730457,2.5064457065,-1.1394267968  
 H,0,-1.9384990174,-1.7518327636,-1.8277447701  
 H,0,-0.2952724452,-0.298263672,1.6386760093  
 H,0,-2.0442147452,0.0875728947,1.3687661783  
 H,0,-3.3988539553,-1.748710024,0.1700524328

H,0,-2.2033984918,-2.6315813337,1.1217112348  
H,0,-3.0399467468,-3.4185299179,-0.2092536973  
H,0,1.0776902507,-3.5432752927,0.2239705853  
H,0,-0.1503667954,-2.8838098073,1.2995596162  
H,0,1.2294295918,-1.8905697693,0.7916069237  
H,0,1.4333165595,-1.1030495987,-1.5718086394  
H,0,0.1283776067,-1.4196357358,-2.7305807391  
H,0,1.2153860732,-2.7210699819,-2.2279033736  
H,0,2.0435344239,2.8504322996,-1.2422608049  
H,0,0.32738742,3.336629054,-1.2253296928  
H,0,0.7914461791,1.7352258675,-1.8659183576

## MPW1K/6-31+G\*\* (Onsager)

Filename: mpBBonsts9

E(RmPW+HF-PW91) = -954.040714342

|                                              |                             |
|----------------------------------------------|-----------------------------|
| Zero-point correction=                       | 0.226889 (Hartree/Particle) |
| Thermal correction to Energy=                | 0.241667                    |
| Thermal correction to Enthalpy=              | 0.242611                    |
| Thermal correction to Gibbs Free Energy=     | 0.184551                    |
| Sum of electronic and zero-point Energies=   | -953.813826                 |
| Sum of electronic and thermal Energies=      | -953.799047                 |
| Sum of electronic and thermal Enthalpies=    | -953.798103                 |
| Sum of electronic and thermal Free Energies= | -953.856163                 |

|       | E (Thermal) | CV             | S              |
|-------|-------------|----------------|----------------|
|       | KCal/Mol    | Cal/Mol-Kelvin | Cal/Mol-Kelvin |
| Total | 151.648     | 52.407         | 122.198        |

C,0,-1.5327870325,-1.9697212687,-0.882608067  
C,0,-0.1815963825,-2.154998365,-0.7606402545  
O,0,-0.8352709925,-0.1170158954,-0.2517700567  
C,0,-0.9240650665,0.1644048343,1.1131903587  
N,0,-0.7669462472,1.4942255526,0.6854935388  
S,0,0.8109605268,1.9799398101,0.540112807  
O,0,1.7554261626,0.9140787877,0.8464741083  
O,0,0.9339080403,3.233367901,1.2663584305  
C,0,-2.5993166452,-2.4115264439,0.0521142231  
C,0,0.4793537704,-2.7586618519,0.4282767797  
C,0,0.7282432555,-1.8101712213,-1.8872022407  
C,0,0.9308386347,2.3497522606,-1.1839151685  
H,0,-1.882473708,-1.5936041442,-1.8342685763  
H,0,-0.1182538686,-0.2780983972,1.6947827554  
H,0,-1.9092912439,-0.0160516335,1.5343305814  
H,0,-3.3696878741,-1.6475476503,0.1379786336  
H,0,-2.2354544179,-2.6559602029,1.0451816176  
H,0,-3.0857770492,-3.3015542759,-0.3491639704  
H,0,0.9438968574,-3.7025560928,0.1395939206  
H,0,-0.1991672264,-2.9611185616,1.2497315613  
H,0,1.2795845076,-2.1062048581,0.7779405732  
H,0,1.5366401748,-1.1720451883,-1.5314705326  
H,0,0.2038988347,-1.3089483591,-2.6954173949  
H,0,1.1840939796,-2.7172577072,-2.2865015525  
H,0,1.9193949542,2.7649850162,-1.3535500402  
H,0,0.1616125719,3.073039803,-1.4292909617  
H,0,0.7909034841,1.4331131516,-1.7439630731

## B3LYP/6-31G\* (gas phase)

E(RB+HF-LYP) = -954.183501704

Zero-point correction= 0.221508 (Hartree/Particle)  
 Thermal correction to Energy= 0.236517  
 Thermal correction to Enthalpy= 0.237461  
 Thermal correction to Gibbs Free Energy= 0.179352  
 Sum of electronic and zero-point Energies= -953.961993  
 Sum of electronic and thermal Energies= -953.946984  
 Sum of electronic and thermal Enthalpies= -953.946040  
 Sum of electronic and thermal Free Energies= -954.004150

|       | E (Thermal) | CV             | S              |
|-------|-------------|----------------|----------------|
|       | KCAL/MOL    | CAL/MOL-KELVIN | CAL/MOL-KELVIN |
| TOTAL | 148.417     | 53.526         | 122.303        |

Standard orientation:

| Center Number | Atomic Number | Atomic Type | Coordinates (Angstroms) |           |           |
|---------------|---------------|-------------|-------------------------|-----------|-----------|
|               |               |             | X                       | Y         | Z         |
| 1             | 6             | 0 C         | 2.649638                | -0.281205 | -0.707056 |
| 2             | 6             | 0 C         | 2.205013                | 0.793393  | 0.052621  |
| 3             | 8             | 0 O         | 0.652612                | -0.480693 | -0.639731 |
| 4             | 6             | 0 C         | 0.066817                | -1.409399 | 0.278986  |
| 5             | 7             | 0 N         | -1.153095               | -1.279145 | -0.421638 |
| 6             | 16            | 0 S         | -2.117622               | -0.021213 | 0.163400  |
| 7             | 8             | 0 O         | -1.361144               | 0.980908  | 0.947885  |
| 8             | 8             | 0 O         | -3.306439               | -0.631019 | 0.780523  |
| 9             | 6             | 0 C         | 3.299333                | -1.541086 | -0.222396 |
| 10            | 6             | 0 C         | 2.166692                | 0.815360  | 1.551162  |
| 11            | 6             | 0 C         | 1.762379                | 2.062052  | -0.614833 |
| 12            | 6             | 0 C         | -2.628284               | 0.750135  | -1.379935 |
| 13            | 1             | 0 H         | 2.703094                | -0.122129 | -1.780995 |
| 14            | 1             | 0 H         | 0.112481                | -1.054022 | 1.314411  |
| 15            | 1             | 0 H         | 0.481360                | -2.418324 | 0.179168  |
| 16            | 1             | 0 H         | 2.941117                | -2.399818 | -0.800452 |
| 17            | 1             | 0 H         | 3.125106                | -1.740854 | 0.837414  |
| 18            | 1             | 0 H         | 4.385657                | -1.483045 | -0.378420 |
| 19            | 1             | 0 H         | 2.818168                | 1.617757  | 1.923361  |
| 20            | 1             | 0 H         | 2.484737                | -0.120534 | 2.014584  |
| 21            | 1             | 0 H         | 1.147209                | 1.049704  | 1.881886  |
| 22            | 1             | 0 H         | 0.745499                | 2.307354  | -0.286030 |
| 23            | 1             | 0 H         | 1.773586                | 1.980036  | -1.704912 |
| 24            | 1             | 0 H         | 2.415925                | 2.894649  | -0.319953 |
| 25            | 1             | 0 H         | -3.342051               | 1.537192  | -1.126093 |
| 26            | 1             | 0 H         | -3.099972               | -0.009107 | -2.005312 |
| 27            | 1             | 0 H         | -1.748059               | 1.165496  | -1.872298 |

### B3LYP/6-31G\* (Onsager)

E(RB+HF-LYP) = -954.188616462

Zero-point correction= 0.221341 (Hartree/Particle)  
 Thermal correction to Energy= 0.236465  
 Thermal correction to Enthalpy= 0.237409  
 Thermal correction to Gibbs Free Energy= 0.178657  
 Sum of electronic and zero-point Energies= -953.967275  
 Sum of electronic and thermal Energies= -953.952151  
 Sum of electronic and thermal Enthalpies= -953.951207  
 Sum of electronic and thermal Free Energies= -954.009959

|       | E (Thermal) | CV             | S              |
|-------|-------------|----------------|----------------|
|       | KCAL/MOL    | CAL/MOL-KELVIN | CAL/MOL-KELVIN |
| TOTAL | 148.384     | 53.627         | 123.655        |



Standard orientation:

| Center Number | Atomic Number | Atomic Type |   | Coordinates (Angstroms) |           |           |
|---------------|---------------|-------------|---|-------------------------|-----------|-----------|
|               |               |             |   | X                       | Y         | Z         |
| 1             | 6             | 0           | C | 2.642419                | -0.288703 | -0.734387 |
| 2             | 6             | 0           | C | 2.250502                | 0.777801  | 0.053892  |
| 3             | 8             | 0           | O | 0.567458                | -0.494108 | -0.593830 |
| 4             | 6             | 0           | C | 0.043519                | -1.397009 | 0.363437  |
| 5             | 7             | 0           | N | -1.180836               | -1.303430 | -0.354160 |
| 6             | 16            | 0           | S | -2.158077               | -0.018000 | 0.152572  |
| 7             | 8             | 0           | O | -1.500126               | 0.877136  | 1.127515  |
| 8             | 8             | 0           | O | -3.463959               | -0.601522 | 0.508875  |
| 9             | 6             | 0           | C | 3.287752                | -1.567646 | -0.300401 |
| 10            | 6             | 0           | C | 2.290693                | 0.783587  | 1.553270  |
| 11            | 6             | 0           | C | 1.799307                | 2.061879  | -0.578626 |
| 12            | 6             | 0           | C | -2.368707               | 0.892245  | -1.387294 |
| 13            | 1             | 0           | H | 2.631339                | -0.123888 | -1.808999 |
| 14            | 1             | 0           | H | 0.069419                | -1.004586 | 1.385373  |
| 15            | 1             | 0           | H | 0.470957                | -2.403156 | 0.295434  |
| 16            | 1             | 0           | H | 2.872916                | -2.412762 | -0.860902 |
| 17            | 1             | 0           | H | 3.183601                | -1.771623 | 0.767890  |
| 18            | 1             | 0           | H | 4.361608                | -1.533968 | -0.530410 |
| 19            | 1             | 0           | H | 2.993713                | 1.553530  | 1.899094  |
| 20            | 1             | 0           | H | 2.596500                | -0.169502 | 1.988859  |
| 21            | 1             | 0           | H | 1.302616                | 1.054130  | 1.946331  |
| 22            | 1             | 0           | H | 0.813996                | 2.341938  | -0.186710 |
| 23            | 1             | 0           | H | 1.742331                | 1.986697  | -1.667717 |
| 24            | 1             | 0           | H | 2.494607                | 2.873675  | -0.324813 |
| 25            | 1             | 0           | H | -3.080460               | 1.698033  | -1.192556 |
| 26            | 1             | 0           | H | -2.757427               | 0.207231  | -2.142130 |
| 27            | 1             | 0           | H | -1.400535               | 1.291280  | -1.690587 |

### BP86/6-31\* (gas phase)

E(RB-P86) = -954.232178847

|                                              |                             |
|----------------------------------------------|-----------------------------|
| Zero-point correction=                       | 0.214385 (Hartree/Particle) |
| Thermal correction to Energy=                | 0.229856                    |
| Thermal correction to Enthalpy=              | 0.230800                    |
| Thermal correction to Gibbs Free Energy=     | 0.171565                    |
| Sum of electronic and zero-point Energies=   | -954.017793                 |
| Sum of electronic and thermal Energies=      | -954.002323                 |
| Sum of electronic and thermal Enthalpies=    | -954.001379                 |
| Sum of electronic and thermal Free Energies= | -954.060614                 |

|       | E (Thermal)<br>KCAL/MOL | CV<br>CAL/MOL-KELVIN | S<br>CAL/MOL-KELVIN |
|-------|-------------------------|----------------------|---------------------|
| TOTAL | 144.237                 | 55.106               | 124.672             |

Standard orientation:

| Center Number | Atomic Number | Atomic Type |  | Coordinates (Angstroms) |           |           |
|---------------|---------------|-------------|--|-------------------------|-----------|-----------|
|               |               |             |  | X                       | Y         | Z         |
| 1             | 6             | 0           |  | 2.690467                | -0.283055 | -0.710824 |
| 2             | 6             | 0           |  | 2.230034                | 0.792168  | 0.053580  |
| 3             | 8             | 0           |  | 0.641235                | -0.477260 | -0.647694 |
| 4             | 6             | 0           |  | 0.071778                | -1.394539 | 0.287036  |
| 5             | 7             | 0           |  | -1.152308               | -1.278809 | -0.447011 |
| 6             | 16            | 0           |  | -2.135364               | -0.014595 | 0.165375  |
| 7             | 8             | 0           |  | -1.388592               | 1.016016  | 0.949201  |

|    |   |   |           |           |           |
|----|---|---|-----------|-----------|-----------|
| 8  | 8 | 0 | -3.311412 | -0.673313 | 0.796683  |
| 9  | 6 | 0 | 3.326856  | -1.550976 | -0.222846 |
| 10 | 6 | 0 | 2.178704  | 0.804671  | 1.555668  |
| 11 | 6 | 0 | 1.796139  | 2.068893  | -0.613991 |
| 12 | 6 | 0 | -2.678700 | 0.745391  | -1.386231 |
| 13 | 1 | 0 | 2.742225  | -0.121237 | -1.794551 |
| 14 | 1 | 0 | 0.093851  | -1.021232 | 1.329080  |
| 15 | 1 | 0 | 0.486973  | -2.417182 | 0.212082  |
| 16 | 1 | 0 | 2.956303  | -2.416621 | -0.800089 |
| 17 | 1 | 0 | 3.152787  | -1.745555 | 0.847556  |
| 18 | 1 | 0 | 4.422791  | -1.509239 | -0.382442 |
| 19 | 1 | 0 | 2.831942  | 1.609044  | 1.946803  |
| 20 | 1 | 0 | 2.492192  | -0.143108 | 2.020157  |
| 21 | 1 | 0 | 1.148549  | 1.041065  | 1.883103  |
| 22 | 1 | 0 | 0.771841  | 2.324625  | -0.285930 |
| 23 | 1 | 0 | 1.809612  | 1.989191  | -1.713198 |
| 24 | 1 | 0 | 2.458098  | 2.905414  | -0.314727 |
| 25 | 1 | 0 | -3.414343 | 1.522340  | -1.126386 |
| 26 | 1 | 0 | -3.139276 | -0.033641 | -2.010911 |
| 27 | 1 | 0 | -1.803074 | 1.182462  | -1.887336 |

### MPW1K/6-31+G\* (gas phase)

E(RmPW+HF-PW91) = -954.006948184

|                                              |                             |
|----------------------------------------------|-----------------------------|
| Zero-point correction=                       | 0.228239 (Hartree/Particle) |
| Thermal correction to Energy=                | 0.242838                    |
| Thermal correction to Enthalpy=              | 0.243782                    |
| Thermal correction to Gibbs Free Energy=     | 0.186493                    |
| Sum of electronic and zero-point Energies=   | -953.778710                 |
| Sum of electronic and thermal Energies=      | -953.764110                 |
| Sum of electronic and thermal Enthalpies=    | -953.763166                 |
| Sum of electronic and thermal Free Energies= | -953.820455                 |

|       | E (Thermal) | CV             | S              |
|-------|-------------|----------------|----------------|
|       | KCAL/MOL    | CAL/MOL-KELVIN | CAL/MOL-KELVIN |
| TOTAL | 152.383     | 52.073         | 120.576        |

C,0,-1.5565380241,-2.0392896417,-0.8585108692  
 C,0,-0.1935253835,-2.1694254282,-0.7403048061  
 O,0,-0.8907101436,-0.2171452851,-0.3489626409  
 C,0,-1.0144874409,0.175920883,0.9981167255  
 N,0,-0.7535616843,1.4677946507,0.5362015361  
 S,0,0.8603724129,1.8374777047,0.4802998298  
 O,0,1.7027036837,0.6483890972,0.5522790063  
 O,0,1.1016885313,2.9019399458,1.4345192153  
 C,0,-2.5975093839,-2.4660783223,0.1141444615  
 C,0,0.5054459235,-2.6677323083,0.4745778363  
 C,0,0.6955090533,-1.840907099,-1.8878872768  
 C,0,1.0013741907,2.5224951518,-1.1418068408  
 H,0,-1.9288868305,-1.7392619235,-1.8284483789  
 H,0,-0.2749533443,-0.3004746119,1.6390548558  
 H,0,-2.0272006831,0.0737659661,1.3787808218  
 H,0,-3.3973910517,-1.7285989578,0.1611390301  
 H,0,-2.2146682742,-2.6235490847,1.1183345266  
 H,0,-3.0505452906,-3.4019893067,-0.2190272275  
 H,0,1.0501647884,-3.5811354888,0.2280617337  
 H,0,-0.1578807843,-2.8875390836,1.3050788096  
 H,0,1.2452929149,-1.9317465716,0.7925987979  
 H,0,1.4470438096,-1.1194424104,-1.5667469094  
 H,0,0.14332297,-1.4288191858,-2.7284438399  
 H,0,1.2219245418,-2.7367198136,-2.2231248183  
 H,0,2.0219546502,2.8779102458,-1.2520317822

H,0,0.3013226171,3.3469169617,-1.2254289086  
H,0,0.7784029688,1.7511079589,-1.8706647677

## MPW1K/6-31+G\* (Onsager)

E(RmPW+HF-PW91) = -954.013157109

|                                              |                             |
|----------------------------------------------|-----------------------------|
| Zero-point correction=                       | 0.228042 (Hartree/Particle) |
| Thermal correction to Energy=                | 0.242780                    |
| Thermal correction to Enthalpy=              | 0.243724                    |
| Thermal correction to Gibbs Free Energy=     | 0.185745                    |
| Sum of electronic and zero-point Energies=   | -953.785115                 |
| Sum of electronic and thermal Energies=      | -953.770377                 |
| Sum of electronic and thermal Enthalpies=    | -953.769433                 |
| Sum of electronic and thermal Free Energies= | -953.827412                 |

|       | E (Thermal) | CV             | S              |
|-------|-------------|----------------|----------------|
|       | KCAL/MOL    | CAL/MOL-KELVIN | CAL/MOL-KELVIN |
| TOTAL | 152.347     | 52.202         | 122.028        |

C,0,-1.5257065958,-2.0304677418,-0.907283481  
C,0,-0.1744617074,-2.2164814048,-0.7844196324  
O,0,-0.8303058121,-0.1839564797,-0.2830838698  
C,0,-0.920440914,0.1033730772,1.0806107802  
N,0,-0.7560609583,1.4313045994,0.6531712192  
S,0,0.8241224557,1.9089023671,0.5086945561  
O,0,1.7635236434,0.8314321608,0.7881317767  
O,0,0.9603669403,3.147896129,1.2560810775  
C,0,-2.5944120336,-2.4684706869,0.0277404658  
C,0,0.4876170101,-2.8154163348,0.406544903  
C,0,0.7366317306,-1.8716562307,-1.910329096  
C,0,0.9338910584,2.3100515123,-1.2098655037  
H,0,-1.8758551547,-1.6574852206,-1.8602806525  
H,0,-0.1201367914,-0.3444317166,1.665388626  
H,0,-1.9077260338,-0.0718228197,1.4989498789  
H,0,-3.3649471678,-1.7031251149,0.1098909424  
H,0,-2.2329623204,-2.7084791045,1.0235633002  
H,0,-3.0816994985,-3.3607486824,-0.3699050158  
H,0,0.9537857499,-3.7609080661,0.1222870111  
H,0,-0.1898677036,-3.0156577576,1.2304781517  
H,0,1.2877344151,-2.1609152193,0.7547790801  
H,0,1.5403192022,-1.2257313207,-1.5558036545  
H,0,0.2122718662,-1.3764276546,-2.7233790585  
H,0,1.2005265852,-2.7776090155,-2.3053308417  
H,0,1.9225700728,2.7270059876,-1.38011058  
H,0,0.1655640297,3.0405950322,-1.4393124843  
H,0,0.7895007038,1.4056029807,-1.7895486262

## Epoxidation TS Isomer 3 + trans-Phenyl

### B3LYP/6-31+G\*\* (PCM)

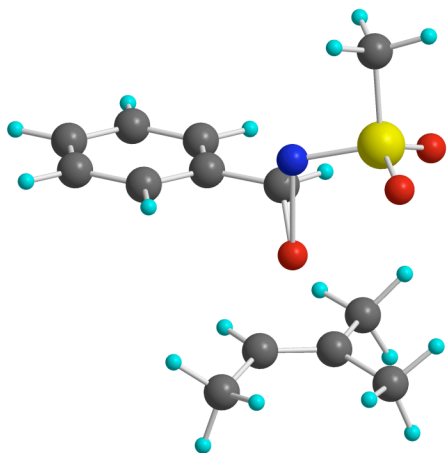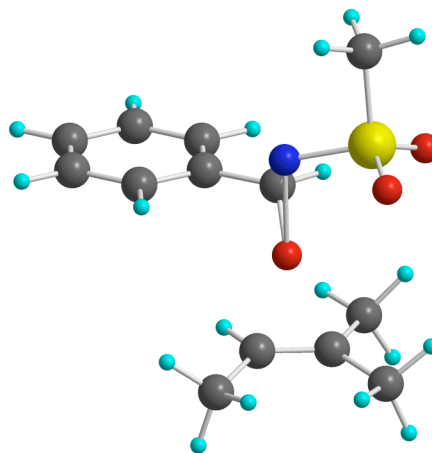

Filename: b3BBPCmts3transfreq  
 E(RB+HF-LYP) = -1185.31458190

|                                              |                             |
|----------------------------------------------|-----------------------------|
| Zero-point correction=                       | 0.298578 (Hartree/Particle) |
| Thermal correction to Energy=                | 0.318880                    |
| Thermal correction to Enthalpy=              | 0.319824                    |
| Thermal correction to Gibbs Free Energy=     | 0.247747                    |
| Sum of electronic and zero-point Energies=   | -1185.016004                |
| Sum of electronic and thermal Energies=      | -1184.995702                |
| Sum of electronic and thermal Enthalpies=    | -1184.994758                |
| Sum of electronic and thermal Free Energies= | -1185.066834                |

|       | E (Thermal) |   | CV             |           | S              |
|-------|-------------|---|----------------|-----------|----------------|
|       | KCal/Mol    |   | Cal/Mol-Kelvin |           | Cal/Mol-Kelvin |
| Total | 200.100     |   | 73.603         |           | 151.698        |
| 1     | 6           | 0 | -3.595238      | -0.994777 | -1.183554      |
| 2     | 6           | 0 | -2.224346      | -0.750931 | -1.093517      |
| 3     | 6           | 0 | -1.601323      | -0.691484 | 0.162091       |
| 4     | 6           | 0 | -2.364487      | -0.881969 | 1.320269       |
| 5     | 6           | 0 | -3.739146      | -1.128744 | 1.230337       |
| 6     | 6           | 0 | -4.355906      | -1.184120 | -0.021997      |
| 7     | 6           | 0 | -0.123606      | -0.434637 | 0.286843       |
| 8     | 8           | 0 | 0.403768       | 0.658032  | -0.468227      |
| 9     | 7           | 0 | 0.696587       | -1.205845 | -0.597238      |
| 10    | 16          | 0 | 2.304334       | -1.407234 | -0.078730      |
| 11    | 8           | 0 | 2.515924       | -0.950897 | 1.316483       |
| 12    | 8           | 0 | 3.220261       | -0.896699 | -1.117621      |
| 13    | 6           | 0 | 2.401105       | -3.207050 | -0.103595      |
| 14    | 6           | 0 | -0.564129      | 2.549370  | -0.379778      |
| 15    | 6           | 0 | -0.595074      | 2.917497  | -1.830428      |
| 16    | 6           | 0 | 0.481064       | 2.726242  | 0.504699       |
| 17    | 6           | 0 | 0.279228       | 2.513997  | 1.978028       |
| 18    | 6           | 0 | 1.841329       | 3.209999  | 0.100658       |
| 19    | 1           | 0 | -1.523040      | 2.265094  | 0.050647       |
| 20    | 1           | 0 | 0.200953       | -0.400916 | 1.332363       |
| 21    | 1           | 0 | -1.217906      | 2.210860  | -2.386390      |
| 22    | 1           | 0 | 0.395874       | 2.935605  | -2.287748      |
| 23    | 1           | 0 | -1.044630      | 3.912953  | -1.951491      |
| 24    | 1           | 0 | 1.979714       | 4.242246  | 0.452297       |
| 25    | 1           | 0 | 2.002980       | 3.192705  | -0.977301      |
| 26    | 1           | 0 | 2.616650       | 2.601821  | 0.578444       |
| 27    | 1           | 0 | 1.022540       | 1.813499  | 2.376397       |
| 28    | 1           | 0 | -0.723127      | 2.147934  | 2.214228       |
| 29    | 1           | 0 | 0.429541       | 3.463685  | 2.509599       |
| 30    | 1           | 0 | 3.432900       | -3.462437 | 0.150468       |
| 31    | 1           | 0 | 2.152388       | -3.552264 | -1.107893      |
| 32    | 1           | 0 | 1.708641       | -3.609742 | 0.637064       |

|    |   |   |           |           |           |
|----|---|---|-----------|-----------|-----------|
| 33 | 1 | 0 | -1.883818 | -0.842253 | 2.297191  |
| 34 | 1 | 0 | -4.323388 | -1.277218 | 2.136203  |
| 35 | 1 | 0 | -5.424646 | -1.375470 | -0.095966 |
| 36 | 1 | 0 | -4.073112 | -1.041535 | -2.160174 |
| 37 | 1 | 0 | -1.630434 | -0.611765 | -1.993002 |

### B3LYP/6-31+G\*\* (gas phase)

Filename: b3BBts3trans

E(RB+HF-LYP) = -1185.29952993

|                                              |                             |
|----------------------------------------------|-----------------------------|
| Zero-point correction=                       | 0.299617 (Hartree/Particle) |
| Thermal correction to Energy=                | 0.319845                    |
| Thermal correction to Enthalpy=              | 0.320789                    |
| Thermal correction to Gibbs Free Energy=     | 0.248596                    |
| Sum of electronic and zero-point Energies=   | -1184.999913                |
| Sum of electronic and thermal Energies=      | -1184.979685                |
| Sum of electronic and thermal Enthalpies=    | -1184.978741                |
| Sum of electronic and thermal Free Energies= | -1185.050934                |

|       | E (Thermal) | CV             | S              |
|-------|-------------|----------------|----------------|
|       | KCal/Mol    | Cal/Mol-Kelvin | Cal/Mol-Kelvin |
| Total | 200.706     | 73.345         | 151.944        |

C,0,-2.7797565147,-2.3528621792,-0.5707525375  
C,0,-1.4308927052,-2.094236614,-1.1682770192  
C,0,-0.192946938,-2.3170687221,-0.5845783042  
C,0,1.0685816002,-2.2010642199,-1.3906947531  
C,0,-0.010388979,-2.7088771927,0.8505018037  
O,0,-0.9230261479,-0.2665073132,-0.3783244913  
C,0,-0.5860434878,0.8048232217,-1.2843414511  
N,0,-0.6600675831,1.6411354945,-0.1393081176  
S,0,0.7747380897,1.6512904219,0.7819640448  
C,0,0.9362551882,3.430427014,1.0309293798  
O,0,1.9349506052,1.1856118658,-0.0149738879  
O,0,0.5446021417,1.0411062704,2.1013800099  
H,0,-1.428805888,-1.8689949743,-2.2332402  
C,0,-1.6201029154,1.1017307181,-2.3390412816  
H,0,0.4116108577,0.659321543,-1.7141543971  
H,0,-3.4986627034,-1.6182227085,-0.9442624639  
H,0,-2.7768132015,-2.3029080636,0.5191018893  
H,0,-3.141242346,-3.3462915119,-0.8705056128  
H,0,0.5474749239,-3.6524995482,0.9081172646  
H,0,-0.9498049272,-2.8274340606,1.3897346023  
H,0,0.5847524843,-1.9456113412,1.3647919611  
H,0,1.7490936889,-1.4737388737,-0.9320298335  
H,0,0.8750087601,-1.9034901475,-2.4243894267  
H,0,1.589586012,-3.1674344142,-1.4033179137  
H,0,1.8044223917,3.5710914636,1.6782211606  
H,0,0.0288125181,3.7916208793,1.5152757191  
H,0,1.0891631783,3.9127271157,0.0650306193  
C,0,-1.2547210784,1.1087720278,-3.6896618164  
C,0,-2.2044590107,1.3782164615,-4.6811207986  
C,0,-3.527814318,1.6422074197,-4.3232259616  
C,0,-3.8977650505,1.6395688162,-2.9723852259  
C,0,-2.9501921893,1.3714951964,-1.984950602  
H,0,-0.2223791702,0.9100896752,-3.9685379947  
H,0,-1.9093742224,1.3839111973,-5.7264808675  
H,0,-4.2679553371,1.8527372524,-5.0899604767  
H,0,-4.9254213783,1.8523165395,-2.69127967  
H,0,-3.223881348,1.3786142907,-0.9347273497

## Epoxidation TS Isomer 5 + trans-Phenyl

B3LYP/6-31+G\*\* (PCM)

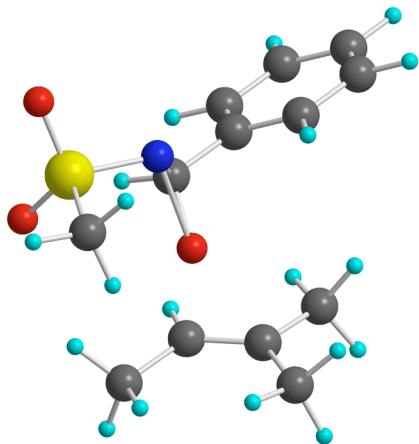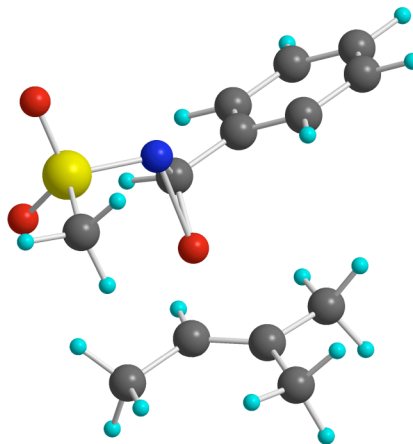

Filename: b3BBPCMts5transfreq

E(RB+HF-LYP) = -1185.31642864

|                                              |                             |
|----------------------------------------------|-----------------------------|
| Zero-point correction=                       | 0.298694 (Hartree/Particle) |
| Thermal correction to Energy=                | 0.318848                    |
| Thermal correction to Enthalpy=              | 0.319792                    |
| Thermal correction to Gibbs Free Energy=     | 0.248619                    |
| Sum of electronic and zero-point Energies=   | -1185.017734                |
| Sum of electronic and thermal Energies=      | -1184.997581                |
| Sum of electronic and thermal Enthalpies=    | -1184.996637                |
| Sum of electronic and thermal Free Energies= | -1185.067810                |

|       | E (Thermal) | CV             | S              |           |           |
|-------|-------------|----------------|----------------|-----------|-----------|
|       | KCal/Mol    | Cal/Mol-Kelvin | Cal/Mol-Kelvin |           |           |
| Total | 200.080     | 73.480         | 149.796        |           |           |
| 1     | 6           | 0              | -3.317368      | -1.400349 | 1.271835  |
| 2     | 6           | 0              | -1.983259      | -1.027247 | 1.104741  |
| 3     | 6           | 0              | -1.429636      | -0.949185 | -0.181817 |
| 4     | 6           | 0              | -2.224086      | -1.251841 | -1.293398 |
| 5     | 6           | 0              | -3.562452      | -1.625469 | -1.126809 |
| 6     | 6           | 0              | -4.110662      | -1.698838 | 0.156143  |
| 7     | 6           | 0              | 0.007878       | -0.549670 | -0.385257 |
| 8     | 8           | 0              | 0.419176       | 0.684653  | 0.216483  |
| 9     | 7           | 0              | 0.917486       | -1.133589 | 0.549944  |
| 10    | 16          | 0              | 2.514348       | -1.277882 | 0.012379  |
| 11    | 8           | 0              | 2.776093       | -0.602141 | -1.279904 |
| 12    | 8           | 0              | 2.840667       | -2.719666 | 0.103327  |
| 13    | 6           | 0              | 3.424931       | -0.423540 | 1.304531  |
| 14    | 6           | 0              | 0.140499       | 2.377985  | -0.958965 |
| 15    | 6           | 0              | 1.567835       | 2.774100  | -1.175257 |
| 16    | 6           | 0              | -0.689854      | 2.740426  | 0.086242  |
| 17    | 6           | 0              | -2.166730      | 2.491744  | 0.014916  |
| 18    | 6           | 0              | -0.207137      | 3.443243  | 1.319177  |
| 19    | 1           | 0              | -0.346001      | 1.930665  | -1.826628 |
| 20    | 1           | 0              | 0.298996       | -0.594971 | -1.441824 |
| 21    | 1           | 0              | 2.137054       | 1.919389  | -1.554402 |

|    |   |   |           |           |           |
|----|---|---|-----------|-----------|-----------|
| 22 | 1 | 0 | 2.054094  | 3.139467  | -0.268745 |
| 23 | 1 | 0 | 1.617155  | 3.569677  | -1.930985 |
| 24 | 1 | 0 | -0.560072 | 4.484361  | 1.311726  |
| 25 | 1 | 0 | 0.878866  | 3.454036  | 1.414418  |
| 26 | 1 | 0 | -0.632454 | 2.973347  | 2.213141  |
| 27 | 1 | 0 | -2.501439 | 1.881810  | 0.861989  |
| 28 | 1 | 0 | -2.463192 | 1.993499  | -0.910397 |
| 29 | 1 | 0 | -2.701651 | 3.449131  | 0.082833  |
| 30 | 1 | 0 | 4.486266  | -0.562898 | 1.086586  |
| 31 | 1 | 0 | 3.161248  | -0.876194 | 2.261158  |
| 32 | 1 | 0 | 3.151485  | 0.630856  | 1.277004  |
| 33 | 1 | 0 | -1.794651 | -1.201566 | -2.293342 |
| 34 | 1 | 0 | -4.171466 | -1.861987 | -1.996947 |
| 35 | 1 | 0 | -5.150205 | -1.991831 | 0.289626  |
| 36 | 1 | 0 | -3.740150 | -1.463553 | 2.272678  |
| 37 | 1 | 0 | -1.363101 | -0.802927 | 1.968706  |

### B3LYP/6-31+G\*\* (gas phase)

E(RB+HF-LYP) = -1185.29948564

|                                              |                             |
|----------------------------------------------|-----------------------------|
| Zero-point correction=                       | 0.299676 (Hartree/Particle) |
| Thermal correction to Energy=                | 0.319764                    |
| Thermal correction to Enthalpy=              | 0.320708                    |
| Thermal correction to Gibbs Free Energy=     | 0.249297                    |
| Sum of electronic and zero-point Energies=   | -1184.999810                |
| Sum of electronic and thermal Energies=      | -1184.979721                |
| Sum of electronic and thermal Enthalpies=    | -1184.978777                |
| Sum of electronic and thermal Free Energies= | -1185.050189                |

|       | E (Thermal) | CV             | S              |
|-------|-------------|----------------|----------------|
|       | KCal/Mol    | Cal/Mol-Kelvin | Cal/Mol-Kelvin |
| Total | 200.655     | 73.265         | 150.299        |

C,0,-0.940579635,-2.0665434589,1.209565621  
 C,0,0.1492063586,-2.220986704,0.1925054803  
 C,0,1.4992887574,-2.4493024317,0.4298862871  
 C,0,2.4100251079,-2.9007015497,-0.670957931  
 C,0,2.1305986912,-2.2888875891,1.7798413005  
 O,0,0.6946422847,-0.3553072803,-0.05599276  
 C,0,0.5069756069,0.2233832527,-1.3708851767  
 N,0,0.4347822019,1.4765023111,-0.7138567976  
 S,0,-1.1333400408,1.9442057034,-0.2678739337  
 C,0,-0.8724987993,2.4425460519,1.441804332  
 O,0,-2.0994916801,0.8235521158,-0.2857549523  
 O,0,-1.4478686834,3.1524565294,-1.0494218081  
 H,0,-0.1998578679,-2.4522324582,-0.8128633219  
 H,0,-0.4231666682,-0.1492027557,-1.8167146724  
 C,0,1.6727039808,0.0822332439,-2.3150860333  
 H,0,-1.6657191175,-1.3255924177,0.8593386718  
 H,0,-0.5663683057,-1.752771774,2.186183132  
 H,0,-1.4635539863,-3.0235238843,1.3380469023  
 H,0,2.3330594801,-3.2777707689,2.2164623843  
 H,0,1.5072493597,-1.7312893603,2.4791933929  
 H,0,3.096220808,-1.7792556838,1.6908524422  
 H,0,3.2109343049,-2.1699943443,-0.8376157939  
 H,0,1.8839434713,-3.0519284514,-1.6154618513  
 H,0,2.8952580239,-3.8441340817,-0.3852767188  
 H,0,-1.8203475481,2.8528114519,1.7956093225  
 H,0,-0.0903484846,3.2018441949,1.4581777171  
 H,0,-0.5834460397,1.5638530624,2.0181899776  
 C,0,1.4895810762,-0.5308022489,-3.5588225686  
 C,0,2.5614222906,-0.670722895,-4.4468212061

C,0,3.8252679339,-0.1952298633,-4.0922723118  
 C,0,4.0122732695,0.4256243337,-2.8508592904  
 C,0,2.9422872806,0.5654607987,-1.967231165  
 H,0,0.502724936,-0.8908702733,-3.8407827409  
 H,0,2.4063512098,-1.1432612307,-5.4124908751  
 H,0,4.6592820711,-0.2988545371,-4.780497368  
 H,0,4.9919031484,0.8080442123,-2.5779787151  
 H,0,3.0741092029,1.0602007802,-1.0102539714

### B3LYP/6-31+G\*\* (gas phase)

Filename: progSI b3BBts5trans  
 E(RB+HF-LYP) = -1185.24166509

Zero-point correction= 0.301728 (Hartree/Particle)  
 Thermal correction to Energy= 0.321648  
 Thermal correction to Enthalpy= 0.322592  
 Thermal correction to Gibbs Free Energy= 0.251148  
 Sum of electronic and zero-point Energies= -1184.939937  
 Sum of electronic and thermal Energies= -1184.920017  
 Sum of electronic and thermal Enthalpies= -1184.919073  
 Sum of electronic and thermal Free Energies= -1184.990517

|       | E (Thermal) | CV             | S              |
|-------|-------------|----------------|----------------|
|       | KCAL/MOL    | CAL/MOL-KELVIN | CAL/MOL-KELVIN |
| TOTAL | 201.837     | 72.692         | 150.367        |

Standard orientation:

| Center Number | Atomic Number | Atomic Type | Coordinates (Angstroms) |           |           |
|---------------|---------------|-------------|-------------------------|-----------|-----------|
|               |               |             | X                       | Y         | Z         |
| 1             | 6             | 0           | 0.249384                | 2.380085  | -0.789652 |
| 2             | 6             | 0           | -0.921999               | 2.655016  | -0.094975 |
| 3             | 8             | 0           | 0.375553                | 0.778446  | 0.261992  |
| 4             | 6             | 0           | 0.063467                | -0.488969 | -0.348128 |
| 5             | 7             | 0           | 0.999515                | -1.053825 | 0.557806  |
| 6             | 16            | 0           | 2.574208                | -1.148730 | -0.057260 |
| 7             | 8             | 0           | 2.834365                | -0.188939 | -1.149587 |
| 8             | 8             | 0           | 2.852541                | -2.573329 | -0.297813 |
| 9             | 6             | 0           | 1.609048                | 2.962221  | -0.540234 |
| 10            | 6             | 0           | -0.949769               | 3.344586  | 1.235362  |
| 11            | 6             | 0           | -2.255845               | 2.279728  | -0.667316 |
| 12            | 6             | 0           | 3.517123                | -0.629311 | 1.384610  |
| 13            | 1             | 0           | 0.123400                | 1.950338  | -1.782325 |
| 14            | 1             | 0           | 0.341592                | -0.485447 | -1.409421 |
| 15            | 6             | 0           | -1.347257               | -0.974143 | -0.137515 |
| 16            | 1             | 0           | 2.368458                | 2.226708  | -0.821031 |
| 17            | 1             | 0           | 1.761771                | 3.245343  | 0.504209  |
| 18            | 1             | 0           | 1.749644                | 3.858568  | -1.159497 |
| 19            | 1             | 0           | -1.388097               | 4.348460  | 1.131792  |
| 20            | 1             | 0           | 0.038444                | 3.450132  | 1.685077  |
| 21            | 1             | 0           | -1.591221               | 2.793851  | 1.934163  |
| 22            | 1             | 0           | -2.809416               | 1.620351  | 0.012724  |
| 23            | 1             | 0           | -2.168714               | 1.778472  | -1.634464 |
| 24            | 1             | 0           | -2.868308               | 3.183744  | -0.800794 |
| 25            | 1             | 0           | 4.574308                | -0.735836 | 1.130762  |
| 26            | 1             | 0           | 3.255222                | -1.277814 | 2.221683  |
| 27            | 1             | 0           | 3.273369                | 0.410638  | 1.606175  |
| 28            | 6             | 0           | -2.097199               | -1.449654 | -1.216123 |
| 29            | 6             | 0           | -3.401564               | -1.912454 | -1.022605 |
| 30            | 6             | 0           | -3.962945               | -1.897568 | 0.253890  |



|    |   |   |           |           |           |
|----|---|---|-----------|-----------|-----------|
| 31 | 6 | 0 | -3.215694 | -1.422905 | 1.337523  |
| 32 | 6 | 0 | -1.914479 | -0.964703 | 1.143985  |
| 33 | 1 | 0 | -1.657024 | -1.466813 | -2.210973 |
| 34 | 1 | 0 | -3.974819 | -2.284241 | -1.867609 |
| 35 | 1 | 0 | -4.976866 | -2.257286 | 0.407952  |
| 36 | 1 | 0 | -3.648372 | -1.418065 | 2.334707  |
| 37 | 1 | 0 | -1.320603 | -0.605660 | 1.978721  |

### B3LYP/6-31G\* (Onsager)

E(RB+HF-LYP) = -1185.24497052

|                                              |                             |
|----------------------------------------------|-----------------------------|
| Zero-point correction=                       | 0.301770 (Hartree/Particle) |
| Thermal correction to Energy=                | 0.321658                    |
| Thermal correction to Enthalpy=              | 0.322602                    |
| Thermal correction to Gibbs Free Energy=     | 0.251771                    |
| Sum of electronic and zero-point Energies=   | -1184.943201                |
| Sum of electronic and thermal Energies=      | -1184.923313                |
| Sum of electronic and thermal Enthalpies=    | -1184.922369                |
| Sum of electronic and thermal Free Energies= | -1184.993200                |

|       |             |                |                |
|-------|-------------|----------------|----------------|
|       | E (Thermal) | CV             | S              |
|       | KCAL/MOL    | CAL/MOL-KELVIN | CAL/MOL-KELVIN |
| TOTAL | 201.843     | 72.721         | 149.076        |

Standard orientation:

| Center Number | Atomic Number | Atomic Type | Coordinates (Angstroms) |           |           |           |
|---------------|---------------|-------------|-------------------------|-----------|-----------|-----------|
|               |               |             | X                       | Y         | Z         |           |
| 1             | 6             | 0           | C                       | 0.253438  | 2.386613  | -0.801897 |
| 2             | 6             | 0           | C                       | -0.909253 | 2.642637  | -0.091073 |
| 3             | 8             | 0           | O                       | 0.404122  | 0.728922  | 0.245529  |
| 4             | 6             | 0           | C                       | 0.058947  | -0.520677 | -0.366835 |
| 5             | 7             | 0           | N                       | 0.993553  | -1.098025 | 0.540249  |
| 6             | 16            | 0           | S                       | 2.578937  | -1.167486 | -0.047505 |
| 7             | 8             | 0           | O                       | 2.800050  | -0.344121 | -1.253818 |
| 8             | 8             | 0           | O                       | 2.947526  | -2.592613 | -0.097949 |
| 9             | 6             | 0           | C                       | 1.617947  | 2.951897  | -0.543566 |
| 10            | 6             | 0           | C                       | -0.929106 | 3.311866  | 1.249339  |
| 11            | 6             | 0           | C                       | -2.247292 | 2.287448  | -0.666444 |
| 12            | 6             | 0           | C                       | 3.476648  | -0.410926 | 1.318030  |
| 13            | 1             | 0           | H                       | 0.121095  | 1.968040  | -1.798430 |
| 14            | 1             | 0           | H                       | 0.335662  | -0.528137 | -1.428075 |
| 15            | 6             | 0           | C                       | -1.357224 | -0.983486 | -0.145336 |
| 16            | 1             | 0           | H                       | 2.373748  | 2.225535  | -0.857068 |
| 17            | 1             | 0           | H                       | 1.779776  | 3.199338  | 0.508581  |
| 18            | 1             | 0           | H                       | 1.759924  | 3.868937  | -1.131323 |
| 19            | 1             | 0           | H                       | -1.350557 | 4.323617  | 1.156949  |
| 20            | 1             | 0           | H                       | 0.058855  | 3.396418  | 1.704015  |
| 21            | 1             | 0           | H                       | -1.583632 | 2.763721  | 1.937433  |
| 22            | 1             | 0           | H                       | -2.811688 | 1.633521  | 0.009304  |
| 23            | 1             | 0           | H                       | -2.167003 | 1.794315  | -1.638398 |
| 24            | 1             | 0           | H                       | -2.845772 | 3.201471  | -0.792869 |
| 25            | 1             | 0           | H                       | 4.541105  | -0.480101 | 1.081677  |
| 26            | 1             | 0           | H                       | 3.247183  | -0.962136 | 2.230977  |
| 27            | 1             | 0           | H                       | 3.163899  | 0.630167  | 1.404479  |
| 28            | 6             | 0           | C                       | -2.126875 | -1.435663 | -1.220021 |
| 29            | 6             | 0           | C                       | -3.439925 | -1.869259 | -1.017754 |
| 30            | 6             | 0           | C                       | -3.989451 | -1.849621 | 0.263914  |
| 31            | 6             | 0           | C                       | -3.221943 | -1.399405 | 1.343853  |

|    |   |   |   |           |           |           |
|----|---|---|---|-----------|-----------|-----------|
| 32 | 6 | 0 | C | -1.912553 | -0.969372 | 1.141303  |
| 33 | 1 | 0 | H | -1.697774 | -1.450834 | -2.219844 |
| 34 | 1 | 0 | H | -4.031652 | -2.216490 | -1.860492 |
| 35 | 1 | 0 | H | -5.011879 | -2.181114 | 0.424178  |
| 36 | 1 | 0 | H | -3.647507 | -1.386055 | 2.343860  |
| 37 | 1 | 0 | H | -1.305385 | -0.624073 | 1.972199  |

---

## Epoxidation TS Isomer 7 + trans-Phenyl

### B3LYP/6-31+G\*\* (PCM)

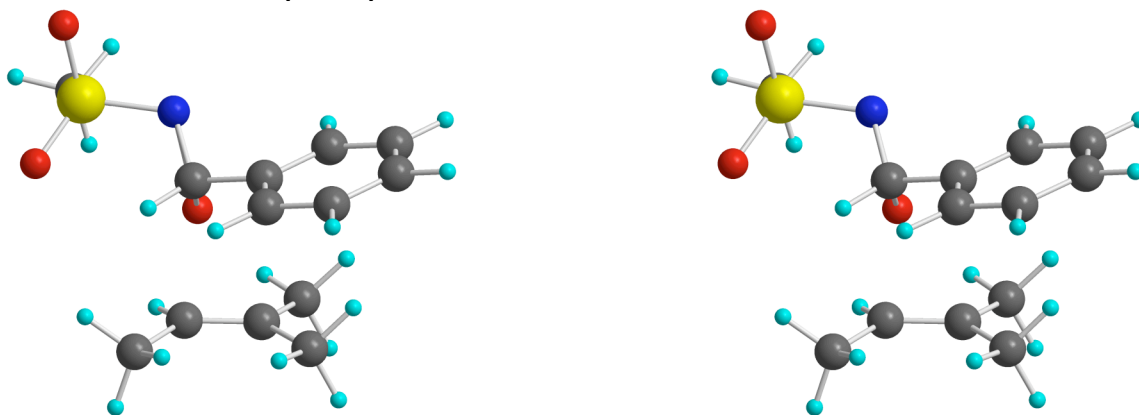

Filename: b3BBPCmts7transfreq

```
[jen@das1 trans]$ progSIb b3BBPCmts7transfreq
b3BBPCmts7transfreq
E(RB+HF-LYP) = -1185.31476994
```

|                                              |                             |
|----------------------------------------------|-----------------------------|
| Zero-point correction=                       | 0.298949 (Hartree/Particle) |
| Thermal correction to Energy=                | 0.318997                    |
| Thermal correction to Enthalpy=              | 0.319941                    |
| Thermal correction to Gibbs Free Energy=     | 0.249134                    |
| Sum of electronic and zero-point Energies=   | -1185.015821                |
| Sum of electronic and thermal Energies=      | -1184.995773                |
| Sum of electronic and thermal Enthalpies=    | -1184.994829                |
| Sum of electronic and thermal Free Energies= | -1185.065636                |

|       |    | E (Thermal) |           | CV             | S              |
|-------|----|-------------|-----------|----------------|----------------|
|       |    | KCal/Mol    |           | Cal/Mol-Kelvin | Cal/Mol-Kelvin |
| Total |    | 200.174     |           | 73.414         | 149.027        |
| 1     | 6  | 0           | -1.728118 | -1.233956      | -1.142425      |
| 2     | 6  | 0           | -1.159096 | -1.061126      | 0.127735       |
| 3     | 6  | 0           | -1.853999 | -1.501384      | 1.260016       |
| 4     | 6  | 0           | -3.109672 | -2.105290      | 1.128844       |
| 5     | 6  | 0           | -3.675297 | -2.270815      | -0.137973      |
| 6     | 6  | 0           | -2.980613 | -1.834729      | -1.274223      |
| 7     | 6  | 0           | 0.195020  | -0.424384      | 0.292865       |
| 8     | 7  | 0           | 1.198464  | -0.943306      | -0.586558      |
| 9     | 16 | 0           | 2.780490  | -0.825517      | 0.006132       |
| 10    | 8  | 0           | 2.867306  | -0.158043      | 1.326510       |
| 11    | 8  | 0           | 0.420952  | 0.809836       | -0.404064      |
| 12    | 6  | 0           | 3.601165  | 0.214493       | -1.209079      |
| 13    | 8  | 0           | 3.346874  | -2.188968      | -0.107230      |
| 14    | 6  | 0           | -0.010216 | 2.610823       | 0.473967       |
| 15    | 6  | 0           | -1.176645 | 2.549450       | -0.270504      |
| 16    | 6  | 0           | -2.504322 | 2.136693       | 0.285947       |

|    |   |   |           |           |           |
|----|---|---|-----------|-----------|-----------|
| 17 | 6 | 0 | 0.137784  | 2.431702  | 1.953706  |
| 18 | 6 | 0 | -1.177456 | 2.982665  | -1.706716 |
| 19 | 1 | 0 | 0.849440  | 3.064262  | -0.016786 |
| 20 | 1 | 0 | 1.092944  | 1.946867  | 2.178668  |
| 21 | 1 | 0 | -0.667511 | 1.849591  | 2.406952  |
| 22 | 1 | 0 | 0.153406  | 3.416796  | 2.439331  |
| 23 | 1 | 0 | -3.181561 | 3.002786  | 0.269426  |
| 24 | 1 | 0 | -2.456191 | 1.765224  | 1.309498  |
| 25 | 1 | 0 | -2.963910 | 1.367173  | -0.344321 |
| 26 | 1 | 0 | -1.651058 | 2.225779  | -2.342415 |
| 27 | 1 | 0 | -0.169458 | 3.175326  | -2.080268 |
| 28 | 1 | 0 | -1.770966 | 3.901730  | -1.815193 |
| 29 | 1 | 0 | 0.479266  | -0.345103 | 1.346771  |
| 30 | 1 | 0 | 4.658996  | 0.238045  | -0.937392 |
| 31 | 1 | 0 | 3.157341  | 1.208432  | -1.163215 |
| 32 | 1 | 0 | 3.461932  | -0.235886 | -2.192801 |
| 33 | 1 | 0 | -1.411665 | -1.377771 | 2.247950  |
| 34 | 1 | 0 | -3.641601 | -2.446265 | 2.014737  |
| 35 | 1 | 0 | -4.651270 | -2.740621 | -0.242704 |
| 36 | 1 | 0 | -3.415510 | -1.968719 | -2.262773 |
| 37 | 1 | 0 | -1.181986 | -0.903693 | -2.022376 |

### B3LYP/6-31+G\*\* (gas phase)

E(RB+HF-LYP) = -1185.29793461

|                                              |                             |
|----------------------------------------------|-----------------------------|
| Zero-point correction=                       | 0.300102 (Hartree/Particle) |
| Thermal correction to Energy=                | 0.319957                    |
| Thermal correction to Enthalpy=              | 0.320902                    |
| Thermal correction to Gibbs Free Energy=     | 0.250685                    |
| Sum of electronic and zero-point Energies=   | -1184.997833                |
| Sum of electronic and thermal Energies=      | -1184.977977                |
| Sum of electronic and thermal Enthalpies=    | -1184.977033                |
| Sum of electronic and thermal Free Energies= | -1185.047250                |

|       | E (Thermal) | CV             | S              |
|-------|-------------|----------------|----------------|
|       | KCal/Mol    | Cal/Mol-Kelvin | Cal/Mol-Kelvin |
| Total | 200.776     | 73.125         | 147.783        |

C,0,0.7077469047,-2.5384220752,0.4042549761  
 C,0,-0.4824290387,-2.1037155049,-0.3969849776  
 C,0,-0.6580618184,-2.1932253981,-1.7758038777  
 C,0,-2.0124948834,-1.960876947,-2.3768485809  
 C,0,0.4335725077,-2.5442678722,-2.7378225022  
 O,0,-0.3455976888,-0.2022664579,-0.6882975328  
 C,0,0.9276633119,0.4914677467,-0.7468552028  
 N,0,0.2534780462,1.6325039421,-0.2420360059  
 S,0,0.2719495132,1.7553499734,1.4486871741  
 C,0,-1.4613498051,2.0966255616,1.7947376105  
 O,0,1.0441504295,2.966890668,1.7759417339  
 O,0,0.6403693203,0.4867240296,2.1169063874  
 H,0,-1.3912023947,-1.9897768354,0.1880893423  
 H,0,0.8416448218,-1.8633172791,1.2552026173  
 H,0,1.6340009031,-2.568852405,-0.173370222  
 H,0,0.5270845871,-3.5450724121,0.8032032063  
 H,0,0.1559145193,-3.45811536,-3.2814843117  
 H,0,1.3994668579,-2.7114224271,-2.2616876375  
 H,0,0.5523981926,-1.7549659706,-3.4897222692  
 H,0,-1.958604225,-1.2139346746,-3.1775271795  
 H,0,-2.7397910196,-1.6238896599,-1.6353902604  
 H,0,-2.3839901435,-2.8888758216,-2.8346750381  
 C,0,1.4940888246,0.681553736,-2.1307845191

```

H,0,1.6517935158,0.0167093566,-0.0762385458
H,0,-1.5327753245,2.2915503007,2.8665840607
H,0,-2.0507802953,1.2246759244,1.5121142958
H,0,-1.7545537043,2.9753005499,1.2197969215
C,0,2.818732792,0.3202009309,-2.3965551941
C,0,3.361939966,0.4993105017,-3.6732131885
C,0,2.5782195742,1.0415473969,-4.6935127089
C,0,1.2524735833,1.4096677556,-4.4311201719
C,0,0.7136275851,1.2333669663,-3.1567947617
H,0,3.4333149527,-0.0944186377,-1.6008410098
H,0,4.3936579122,0.2198778378,-3.8664059829
H,0,2.9969529844,1.1839035072,-5.6856393477
H,0,0.6438938627,1.8429892069,-5.2199573375
H,0,-0.3071011271,1.5318798461,-2.9402299598

```

## Epoxidation TS Isomer 8 + trans-Phenyl

### B3LYP/6-31+G\*\* (PCM)

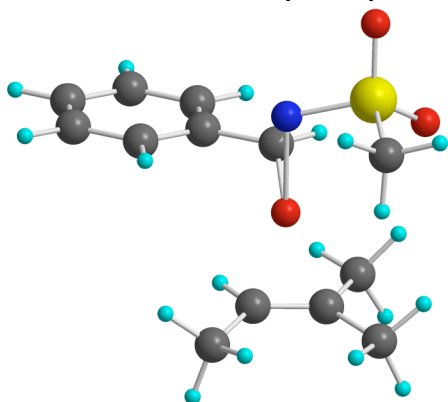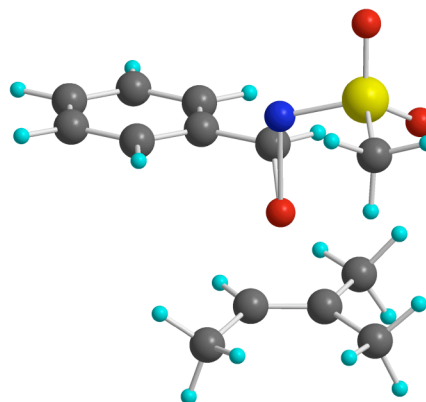

Filename: b3BBPCmts8transfreq

```

[jen@das1 trans]$ progSIb b3BBPCmts8transfreq
b3BBPCmts8transfreq
E(RB+HF-LYP) = -1185.31652650

```

```

Zero-point correction=                0.298876 (Hartree/Particle)
Thermal correction to Energy=          0.319019
Thermal correction to Enthalpy=        0.319963
Thermal correction to Gibbs Free Energy= 0.248505
Sum of electronic and zero-point Energies= -1185.017650
Sum of electronic and thermal Energies= -1184.997507
Sum of electronic and thermal Enthalpies= -1184.996563
Sum of electronic and thermal Free Energies= -1185.068021

```

|       | E (Thermal) |         | CV             |           | S              |
|-------|-------------|---------|----------------|-----------|----------------|
|       | KCal/Mol    |         | Cal/Mol-Kelvin |           | Cal/Mol-Kelvin |
| Total |             | 200.188 |                | 73.470    | 150.396        |
| 1     | 6           | 0       | -2.257375      | -0.697280 | -1.102268      |
| 2     | 6           | 0       | -1.660922      | -0.646916 | 0.166469       |
| 3     | 6           | 0       | -2.460209      | -0.768864 | 1.309048       |
| 4     | 6           | 0       | -3.844574      | -0.936566 | 1.190291       |
| 5     | 6           | 0       | -4.434743      | -0.981814 | -0.075151      |
| 6     | 6           | 0       | -3.637600      | -0.862662 | -1.221440      |
| 7     | 6           | 0       | -0.173045      | -0.473251 | 0.318852       |
| 8     | 7           | 0       | 0.615109       | -1.314313 | -0.533031      |
| 9     | 16          | 0       | 2.173549       | -1.641350 | 0.040953       |
| 10    | 8           | 0       | 2.515556       | -0.907112 | 1.281796       |
| 11    | 8           | 0       | 0.421103       | 0.588044  | -0.434536      |

|    |   |   |           |           |           |
|----|---|---|-----------|-----------|-----------|
| 12 | 6 | 0 | 0.615344  | 2.640415  | 0.512812  |
| 13 | 6 | 0 | 1.992691  | 3.055601  | 0.093264  |
| 14 | 6 | 0 | -0.446816 | 2.505113  | -0.361926 |
| 15 | 6 | 0 | -0.480593 | 2.873581  | -1.812162 |
| 16 | 6 | 0 | 0.424303  | 2.433283  | 1.987047  |
| 17 | 6 | 0 | 3.216267  | -1.029197 | -1.288588 |
| 18 | 8 | 0 | 2.290484  | -3.117353 | 0.068534  |
| 19 | 1 | 0 | -1.413093 | 2.269989  | 0.081032  |
| 20 | 1 | 0 | 0.128827  | -0.439703 | 1.370713  |
| 21 | 1 | 0 | -1.133241 | 2.187397  | -2.359313 |
| 22 | 1 | 0 | 0.504890  | 2.860314  | -2.281346 |
| 23 | 1 | 0 | -0.898854 | 3.883030  | -1.928504 |
| 24 | 1 | 0 | 2.207164  | 4.059501  | 0.485258  |
| 25 | 1 | 0 | 2.129064  | 3.078133  | -0.988346 |
| 26 | 1 | 0 | 2.736469  | 2.380268  | 0.531423  |
| 27 | 1 | 0 | 1.127751  | 1.681254  | 2.365056  |
| 28 | 1 | 0 | -0.595129 | 2.130111  | 2.237916  |
| 29 | 1 | 0 | 0.646002  | 3.366478  | 2.522198  |
| 30 | 1 | 0 | 4.243982  | -1.295206 | -1.031117 |
| 31 | 1 | 0 | 3.090109  | 0.051349  | -1.350026 |
| 32 | 1 | 0 | 2.908000  | -1.516684 | -2.214369 |
| 33 | 1 | 0 | -2.000777 | -0.743064 | 2.296333  |
| 34 | 1 | 0 | -4.456891 | -1.034060 | 2.084425  |
| 35 | 1 | 0 | -5.510781 | -1.113008 | -0.171120 |
| 36 | 1 | 0 | -4.094184 | -0.904774 | -2.208387 |
| 37 | 1 | 0 | -1.635345 | -0.616808 | -1.989692 |

### B3LYP/6-31+G\*\* (gas phase)

E(RB+HF-LYP) = -1185.29999809

|                                              |                             |
|----------------------------------------------|-----------------------------|
| Zero-point correction=                       | 0.299644 (Hartree/Particle) |
| Thermal correction to Energy=                | 0.319817                    |
| Thermal correction to Enthalpy=              | 0.320761                    |
| Thermal correction to Gibbs Free Energy=     | 0.248652                    |
| Sum of electronic and zero-point Energies=   | -1185.000354                |
| Sum of electronic and thermal Energies=      | -1184.980181                |
| Sum of electronic and thermal Enthalpies=    | -1184.979237                |
| Sum of electronic and thermal Free Energies= | -1185.051346                |

|       | E (Thermal) | CV             | S              |
|-------|-------------|----------------|----------------|
|       | KCal/Mol    | Cal/Mol-Kelvin | Cal/Mol-Kelvin |
| Total | 200.688     | 73.324         | 151.767        |
| 1     | 6           | 0              | -0.618530      |
| 2     | 6           | 0              | -0.471420      |
| 3     | 6           | 0              | 0.652059       |
| 4     | 6           | 0              | 0.573175       |
| 5     | 6           | 0              | 1.999015       |
| 6     | 8           | 0              | 0.372993       |
| 7     | 6           | 0              | -0.162367      |
| 8     | 7           | 0              | 0.618088       |
| 9     | 16          | 0              | 2.172903       |
| 10    | 6           | 0              | 3.154224       |
| 11    | 8           | 0              | 2.223727       |
| 12    | 8           | 0              | 2.621829       |
| 13    | 1           | 0              | -1.401199      |
| 14    | 6           | 0              | -1.651945      |
| 15    | 1           | 0              | 0.142503       |
| 16    | 1           | 0              | -1.318353      |
| 17    | 1           | 0              | 0.326945       |
| 18    | 1           | 0              | -1.031402      |
|       |             |                | 2.857834       |
|       |             |                | 2.462151       |
|       |             |                | 2.618711       |
|       |             |                | 2.397418       |
|       |             |                | 3.018468       |
|       |             |                | 0.661343       |
|       |             |                | -0.446981      |
|       |             |                | -1.295406      |
|       |             |                | -1.594824      |
|       |             |                | -1.395873      |
|       |             |                | -3.015828      |
|       |             |                | -0.586267      |
|       |             |                | 2.225678       |
|       |             |                | -0.642993      |
|       |             |                | -0.370244      |
|       |             |                | 2.183332       |
|       |             |                | 2.835131       |
|       |             |                | 3.873313       |
|       |             |                | -1.773873      |
|       |             |                | -0.336222      |
|       |             |                | 0.467189       |
|       |             |                | 1.948573       |
|       |             |                | -0.049964      |
|       |             |                | -0.458623      |
|       |             |                | 0.304044       |
|       |             |                | -0.522666      |
|       |             |                | 0.074765       |
|       |             |                | -1.420871      |
|       |             |                | 0.462975       |
|       |             |                | 1.062677       |
|       |             |                | 0.176758       |
|       |             |                | 0.174601       |
|       |             |                | 1.353673       |
|       |             |                | -2.274525      |
|       |             |                | -2.318339      |
|       |             |                | -1.844126      |

|    |   |   |           |           |           |
|----|---|---|-----------|-----------|-----------|
| 19 | 1 | 0 | 2.316353  | 3.956817  | 0.423851  |
| 20 | 1 | 0 | 2.026896  | 3.152023  | -1.131381 |
| 21 | 1 | 0 | 2.730254  | 2.251253  | 0.232153  |
| 22 | 1 | 0 | 1.302244  | 1.637309  | 2.255159  |
| 23 | 1 | 0 | -0.424756 | 2.092926  | 2.272940  |
| 24 | 1 | 0 | 0.837895  | 3.323944  | 2.475164  |
| 25 | 1 | 0 | 4.181290  | -1.656765 | -1.158529 |
| 26 | 1 | 0 | 3.081976  | -0.358384 | -1.747296 |
| 27 | 1 | 0 | 2.761719  | -2.075951 | -2.177185 |
| 28 | 6 | 0 | -2.455191 | -0.652109 | 1.319910  |
| 29 | 6 | 0 | -3.839508 | -0.826727 | 1.215887  |
| 30 | 6 | 0 | -4.427116 | -0.993647 | -0.039209 |
| 31 | 6 | 0 | -3.626532 | -0.991660 | -1.188411 |
| 32 | 6 | 0 | -2.246895 | -0.819040 | -1.083029 |
| 33 | 1 | 0 | -1.997109 | -0.534601 | 2.299378  |
| 34 | 1 | 0 | -4.452556 | -0.837438 | 2.112481  |
| 35 | 1 | 0 | -5.501177 | -1.131971 | -0.124030 |
| 36 | 1 | 0 | -4.080180 | -1.133791 | -2.165303 |
| 37 | 1 | 0 | -1.616612 | -0.834856 | -1.966389 |

### B3LYP/6-311+G\*\* (PCM)

Filename: b3BB1PCMtransts8freq  
E(RB+HF-LYP) = -1185.50608450

|                                              |                             |
|----------------------------------------------|-----------------------------|
| Zero-point correction=                       | 0.297706 (Hartree/Particle) |
| Thermal correction to Energy=                | 0.317886                    |
| Thermal correction to Enthalpy=              | 0.318830                    |
| Thermal correction to Gibbs Free Energy=     | 0.247179                    |
| Sum of electronic and zero-point Energies=   | -1185.208378                |
| Sum of electronic and thermal Energies=      | -1185.188198                |
| Sum of electronic and thermal Enthalpies=    | -1185.187254                |
| Sum of electronic and thermal Free Energies= | -1185.258905                |

|       |    |   | E (Thermal) | CV             | S              |
|-------|----|---|-------------|----------------|----------------|
|       |    |   | KCal/Mol    | Cal/Mol-Kelvin | Cal/Mol-Kelvin |
| Total |    |   | 199.477     | 73.568         | 150.802        |
| 1     | 6  | 0 | -2.244747   | -0.744036      | -1.098399      |
| 2     | 6  | 0 | -1.655692   | -0.660741      | 0.168491       |
| 3     | 6  | 0 | -2.459223   | -0.748788      | 1.306979       |
| 4     | 6  | 0 | -3.840066   | -0.916658      | 1.186173       |
| 5     | 6  | 0 | -4.422353   | -0.994966      | -0.077145      |
| 6     | 6  | 0 | -3.621176   | -0.909583      | -1.219362      |
| 7     | 6  | 0 | -0.170263   | -0.478342      | 0.322375       |
| 8     | 7  | 0 | 0.624769    | -1.316976      | -0.521311      |
| 9     | 16 | 0 | 2.181460    | -1.632037      | 0.052759       |
| 10    | 8  | 0 | 2.526181    | -0.878733      | 1.273476       |
| 11    | 8  | 0 | 0.416526    | 0.583953       | -0.432107      |
| 12    | 6  | 0 | 0.592544    | 2.650293       | 0.501387       |
| 13    | 6  | 0 | 1.973428    | 3.060645       | 0.097615       |
| 14    | 6  | 0 | -0.454992   | 2.508777       | -0.382842      |
| 15    | 6  | 0 | -0.469754   | 2.864226       | -1.833949      |
| 16    | 6  | 0 | 0.382311    | 2.455687       | 1.972346       |
| 17    | 6  | 0 | 3.212233    | -1.042315      | -1.293638      |
| 18    | 8  | 0 | 2.300285    | -3.100180      | 0.107856       |
| 19    | 1  | 0 | -1.425306   | 2.276711       | 0.048479       |
| 20    | 1  | 0 | 0.129672    | -0.438706      | 1.372607       |
| 21    | 1  | 0 | -1.101793   | 2.165821       | -2.386466      |
| 22    | 1  | 0 | 0.521667    | 2.864810       | -2.285946      |
| 23    | 1  | 0 | -0.902522   | 3.864165       | -1.963987      |
| 24    | 1  | 0 | 2.182500    | 4.066054       | 0.484249       |
| 25    | 1  | 0 | 2.124587    | 3.074623       | -0.980265      |
| 26    | 1  | 0 | 2.709140    | 2.389858       | 0.551568       |
| 27    | 1  | 0 | 1.080503    | 1.708812       | 2.364988       |

|    |   |   |           |           |           |
|----|---|---|-----------|-----------|-----------|
| 28 | 1 | 0 | -0.638739 | 2.155369  | 2.211529  |
| 29 | 1 | 0 | 0.597235  | 3.392071  | 2.501350  |
| 30 | 1 | 0 | 4.240716  | -1.298044 | -1.036572 |
| 31 | 1 | 0 | 3.079296  | 0.034187  | -1.373902 |
| 32 | 1 | 0 | 2.899964  | -1.549925 | -2.204801 |
| 33 | 1 | 0 | -2.005926 | -0.697456 | 2.293971  |
| 34 | 1 | 0 | -4.456389 | -0.988361 | 2.077678  |
| 35 | 1 | 0 | -5.496287 | -1.126428 | -0.174856 |
| 36 | 1 | 0 | -4.072661 | -0.978113 | -2.205097 |
| 37 | 1 | 0 | -1.619837 | -0.689545 | -1.983477 |

### B3LYP/6-31G\* (gas phase)

E(RB+HF-LYP) = -1185.24269945

|                                              |                             |
|----------------------------------------------|-----------------------------|
| Zero-point correction=                       | 0.301882 (Hartree/Particle) |
| Thermal correction to Energy=                | 0.321773                    |
| Thermal correction to Enthalpy=              | 0.322717                    |
| Thermal correction to Gibbs Free Energy=     | 0.251654                    |
| Sum of electronic and zero-point Energies=   | -1184.940817                |
| Sum of electronic and thermal Energies=      | -1184.920927                |
| Sum of electronic and thermal Enthalpies=    | -1184.919982                |
| Sum of electronic and thermal Free Energies= | -1184.991046                |

|       | E (Thermal) | CV             | S              |
|-------|-------------|----------------|----------------|
|       | KCAL/MOL    | CAL/MOL-KELVIN | CAL/MOL-KELVIN |
| TOTAL | 201.916     | 72.695         | 149.565        |

Standard orientation:

| Center Number | Atomic Number | Atomic Type | Coordinates (Angstroms) |           |           |
|---------------|---------------|-------------|-------------------------|-----------|-----------|
|               |               |             | X                       | Y         | Z         |
| 1             | 6             | 0           | -0.566792               | 2.408315  | -0.253580 |
| 2             | 6             | 0           | 0.626909                | 2.606430  | 0.428790  |
| 3             | 8             | 0           | 0.348366                | 0.660111  | -0.450568 |
| 4             | 6             | 0           | -0.143747               | -0.458028 | 0.323611  |
| 5             | 7             | 0           | 0.648353                | -1.289902 | -0.506530 |
| 6             | 16            | 0           | 2.214723                | -1.525705 | 0.075300  |
| 7             | 8             | 0           | 2.303844                | -2.911128 | 0.564177  |
| 8             | 8             | 0           | 2.678539                | -0.441718 | 0.969299  |
| 9             | 6             | 0           | -0.887185               | 2.781476  | -1.668001 |
| 10            | 6             | 0           | 1.899765                | 3.048322  | -0.224742 |
| 11            | 6             | 0           | 0.713747                | 2.374965  | 1.908070  |
| 12            | 6             | 0           | 3.146714                | -1.417223 | -1.460709 |
| 13            | 1             | 0           | -1.427584               | 2.136155  | 0.353755  |
| 14            | 6             | 0           | -1.629188               | -0.683404 | 0.198411  |
| 15            | 1             | 0           | 0.163089                | -0.364869 | 1.371747  |
| 16            | 1             | 0           | -1.567505               | 2.039261  | -2.096581 |
| 17            | 1             | 0           | -0.001655               | 2.842688  | -2.303915 |
| 18            | 1             | 0           | -1.398849               | 3.753717  | -1.696687 |
| 19            | 1             | 0           | 2.233653                | 4.001064  | 0.208620  |
| 20            | 1             | 0           | 1.812518                | 3.173395  | -1.305001 |
| 21            | 1             | 0           | 2.679066                | 2.305007  | -0.015953 |
| 22            | 1             | 0           | 1.470195                | 1.607562  | 2.116694  |
| 23            | 1             | 0           | -0.242157               | 2.064544  | 2.339339  |
| 24            | 1             | 0           | 1.037115                | 3.294949  | 2.414090  |
| 25            | 1             | 0           | 4.188552                | -1.641428 | -1.220656 |
| 26            | 1             | 0           | 3.047546                | -0.406929 | -1.859942 |
| 27            | 1             | 0           | 2.746971                | -2.152520 | -2.160428 |
| 28            | 6             | 0           | -2.212229               | -0.898968 | -1.057994 |
| 29            | 6             | 0           | -3.589292               | -1.074477 | -1.170309 |
| 30            | 6             | 0           | -4.399357               | -1.037444 | -0.030169 |
| 31            | 6             | 0           | -3.824224               | -0.829916 | 1.222941  |

|    |   |   |           |           |           |
|----|---|---|-----------|-----------|-----------|
| 32 | 6 | 0 | -2.442240 | -0.653300 | 1.334727  |
| 33 | 1 | 0 | -1.571531 | -0.941557 | -1.933250 |
| 34 | 1 | 0 | -4.034492 | -1.246078 | -2.146944 |
| 35 | 1 | 0 | -5.473563 | -1.175222 | -0.120788 |
| 36 | 1 | 0 | -4.446391 | -0.807876 | 2.113665  |
| 37 | 1 | 0 | -1.992302 | -0.499874 | 2.313601  |

### B3LYP/6-31G\* (Onsager)

E(RB+HF-LYP) = -1185.24706290

|                                              |                             |
|----------------------------------------------|-----------------------------|
| Zero-point correction=                       | 0.301923 (Hartree/Particle) |
| Thermal correction to Energy=                | 0.321806                    |
| Thermal correction to Enthalpy=              | 0.322750                    |
| Thermal correction to Gibbs Free Energy=     | 0.252193                    |
| Sum of electronic and zero-point Energies=   | -1184.945140                |
| Sum of electronic and thermal Energies=      | -1184.925257                |
| Sum of electronic and thermal Enthalpies=    | -1184.924313                |
| Sum of electronic and thermal Free Energies= | -1184.994869                |

|       |             |                |                |
|-------|-------------|----------------|----------------|
|       | E (Thermal) | CV             | S              |
|       | KCAL/MOL    | CAL/MOL-KELVIN | CAL/MOL-KELVIN |
| TOTAL | 201.936     | 72.742         | 148.499        |

Standard orientation:

| Center Number | Atomic Number | Atomic Type | Coordinates (Angstroms) |           |           |           |
|---------------|---------------|-------------|-------------------------|-----------|-----------|-----------|
|               |               |             | X                       | Y         | Z         |           |
| 1             | 6             | 0           | C                       | -0.619784 | 2.394642  | -0.231568 |
| 2             | 6             | 0           | C                       | 0.575122  | 2.609207  | 0.434714  |
| 3             | 8             | 0           | O                       | 0.371738  | 0.603020  | -0.428661 |
| 4             | 6             | 0           | C                       | -0.136429 | -0.496124 | 0.342897  |
| 5             | 7             | 0           | N                       | 0.668087  | -1.320702 | -0.494703 |
| 6             | 16            | 0           | S                       | 2.249595  | -1.528375 | 0.057363  |
| 7             | 8             | 0           | O                       | 2.457102  | -2.977730 | 0.224558  |
| 8             | 8             | 0           | O                       | 2.607877  | -0.637594 | 1.181754  |
| 9             | 6             | 0           | C                       | -0.962515 | 2.751733  | -1.643003 |
| 10            | 6             | 0           | C                       | 1.819002  | 3.112903  | -0.231875 |
| 11            | 6             | 0           | C                       | 0.685315  | 2.378255  | 1.913040  |
| 12            | 6             | 0           | C                       | 3.189685  | -1.005384 | -1.387865 |
| 13            | 1             | 0           | H                       | -1.464728 | 2.089869  | 0.382554  |
| 14            | 6             | 0           | C                       | -1.619455 | -0.724416 | 0.205337  |
| 15            | 1             | 0           | H                       | 0.170538  | -0.417796 | 1.391552  |
| 16            | 1             | 0           | H                       | -1.619241 | 1.986706  | -2.068496 |
| 17            | 1             | 0           | H                       | -0.086493 | 2.853334  | -2.286770 |
| 18            | 1             | 0           | H                       | -1.513290 | 3.702350  | -1.664515 |
| 19            | 1             | 0           | H                       | 2.038244  | 4.132621  | 0.114338  |
| 20            | 1             | 0           | H                       | 1.747420  | 3.134144  | -1.320311 |
| 21            | 1             | 0           | H                       | 2.670635  | 2.485326  | 0.056347  |
| 22            | 1             | 0           | H                       | 1.451799  | 1.618431  | 2.113916  |
| 23            | 1             | 0           | H                       | -0.261833 | 2.057646  | 2.356092  |
| 24            | 1             | 0           | H                       | 1.003575  | 3.301699  | 2.415391  |
| 25            | 1             | 0           | H                       | 4.244977  | -1.187754 | -1.171345 |
| 26            | 1             | 0           | H                       | 3.003433  | 0.055317  | -1.558592 |
| 27            | 1             | 0           | H                       | 2.863536  | -1.597621 | -2.244022 |
| 28            | 6             | 0           | C                       | -2.195642 | -0.921208 | -1.057245 |
| 29            | 6             | 0           | C                       | -3.573294 | -1.085310 | -1.180280 |
| 30            | 6             | 0           | C                       | -4.390249 | -1.054810 | -0.044892 |
| 31            | 6             | 0           | C                       | -3.821708 | -0.867094 | 1.214489  |
| 32            | 6             | 0           | C                       | -2.439160 | -0.703170 | 1.337186  |
| 33            | 1             | 0           | H                       | -1.551111 | -0.948750 | -1.930240 |
| 34            | 1             | 0           | H                       | -4.014824 | -1.233440 | -2.162270 |



|    |   |   |   |           |           |           |
|----|---|---|---|-----------|-----------|-----------|
| 35 | 1 | 0 | H | -5.465763 | -1.173228 | -0.145077 |
| 36 | 1 | 0 | H | -4.450958 | -0.841338 | 2.100040  |
| 37 | 1 | 0 | H | -1.995117 | -0.555504 | 2.319696  |

## Epoxidation TS Isomer 9 + trans-Phenyl

### B3LYP/6-31+G\*\* (PCM)

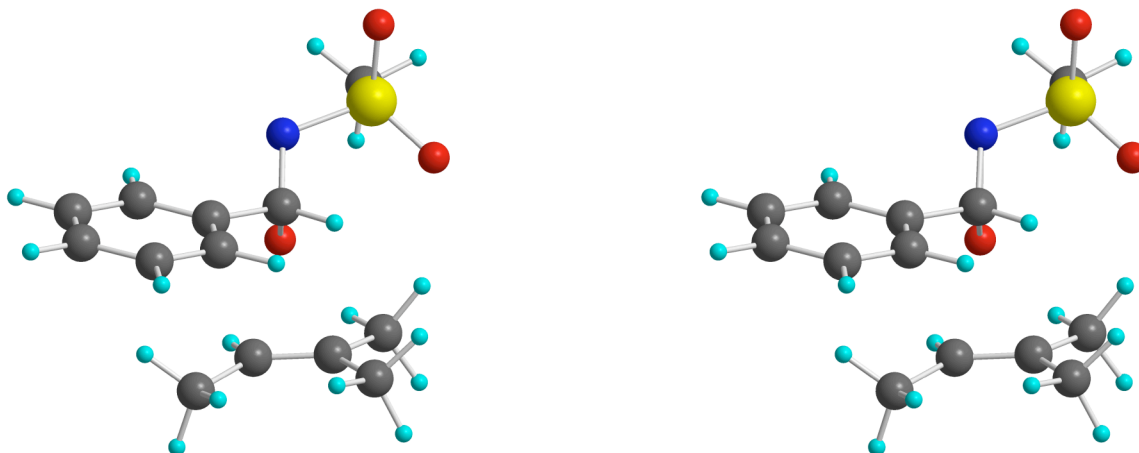

Filename: b3BBPCmts9transfreq

```
[jen@das1 trans]$ progSIb b3BBPCmts9transfreq
b3BBPCmts9transfreq
E(RB+HF-LYP) = -1185.31505098
```

|                                              |                             |
|----------------------------------------------|-----------------------------|
| Zero-point correction=                       | 0.298867 (Hartree/Particle) |
| Thermal correction to Energy=                | 0.318898                    |
| Thermal correction to Enthalpy=              | 0.319842                    |
| Thermal correction to Gibbs Free Energy=     | 0.248973                    |
| Sum of electronic and zero-point Energies=   | -1185.016184                |
| Sum of electronic and thermal Energies=      | -1184.996153                |
| Sum of electronic and thermal Enthalpies=    | -1184.995209                |
| Sum of electronic and thermal Free Energies= | -1185.066078                |

|       |    | E (Thermal) |           | CV             | S              |
|-------|----|-------------|-----------|----------------|----------------|
|       |    | KCal/Mol    |           | Cal/Mol-Kelvin | Cal/Mol-Kelvin |
| Total |    | 200.112     |           | 73.479         | 149.158        |
| 1     | 6  | 0           | 1.927226  | 2.533512       | -0.730939      |
| 2     | 6  | 0           | 0.442711  | 2.539773       | -0.897971      |
| 3     | 6  | 0           | -0.520144 | 2.686345       | 0.087349       |
| 4     | 6  | 0           | -1.953261 | 2.934906       | -0.279216      |
| 5     | 6  | 0           | -0.211884 | 2.732668       | 1.555136       |
| 6     | 8  | 0           | -0.425772 | 0.600930       | -0.635149      |
| 7     | 6  | 0           | 0.075420  | -0.402433      | 0.266958       |
| 8     | 7  | 0           | -0.785646 | -1.294153      | -0.443221      |
| 9     | 16 | 0           | -2.360473 | -1.394817      | 0.157467       |
| 10    | 6  | 0           | -3.352248 | -1.017624      | -1.292975      |
| 11    | 8  | 0           | -2.663287 | -0.394263      | 1.208948       |
| 12    | 8  | 0           | -2.580132 | -2.820417      | 0.495330       |
| 13    | 1  | 0           | 0.092426  | 2.599680       | -1.927829      |
| 14    | 1  | 0           | -0.208221 | -0.179248      | 1.300809       |
| 15    | 6  | 0           | 1.537924  | -0.744222      | 0.151343       |
| 16    | 1  | 0           | 2.383353  | 1.769783       | -1.367725      |
| 17    | 1  | 0           | 2.255984  | 2.368254       | 0.295954       |
| 18    | 1  | 0           | 2.322368  | 3.504292       | -1.062375      |

|    |   |   |           |           |           |
|----|---|---|-----------|-----------|-----------|
| 19 | 1 | 0 | -0.330816 | 3.764043  | 1.914945  |
| 20 | 1 | 0 | 0.799351  | 2.405828  | 1.800202  |
| 21 | 1 | 0 | -0.930124 | 2.121236  | 2.112586  |
| 22 | 1 | 0 | -2.599779 | 2.207914  | 0.225626  |
| 23 | 1 | 0 | -2.117128 | 2.875046  | -1.357752 |
| 24 | 1 | 0 | -2.256502 | 3.933632  | 0.063434  |
| 25 | 1 | 0 | -4.396606 | -1.160163 | -1.006286 |
| 26 | 1 | 0 | -3.068932 | -1.709656 | -2.087067 |
| 27 | 1 | 0 | -3.159319 | 0.015100  | -1.582306 |
| 28 | 6 | 0 | 2.343858  | -0.719778 | 1.295112  |
| 29 | 6 | 0 | 3.704391  | -1.036851 | 1.209914  |
| 30 | 6 | 0 | 4.263855  | -1.381912 | -0.022790 |
| 31 | 6 | 0 | 3.458989  | -1.412644 | -1.169415 |
| 32 | 6 | 0 | 2.102878  | -1.096216 | -1.083346 |
| 33 | 1 | 0 | 1.908192  | -0.461221 | 2.259433  |
| 34 | 1 | 0 | 4.322085  | -1.017158 | 2.105504  |
| 35 | 1 | 0 | 5.320982  | -1.630886 | -0.091948 |
| 36 | 1 | 0 | 3.890408  | -1.687896 | -2.129871 |
| 37 | 1 | 0 | 1.474593  | -1.125578 | -1.970262 |

### B3LYP/6-31+G\*\* (gas phase)

Filename: b3BBts9trans

E(RB+HF-LYP) = -1185.29776352

|                                              |                             |
|----------------------------------------------|-----------------------------|
| Zero-point correction=                       | 0.299981 (Hartree/Particle) |
| Thermal correction to Energy=                | 0.319847                    |
| Thermal correction to Enthalpy=              | 0.320791                    |
| Thermal correction to Gibbs Free Energy=     | 0.250576                    |
| Sum of electronic and zero-point Energies=   | -1184.997782                |
| Sum of electronic and thermal Energies=      | -1184.977917                |
| Sum of electronic and thermal Enthalpies=    | -1184.976973                |
| Sum of electronic and thermal Free Energies= | -1185.047187                |

|       | E (Thermal)<br>KCal/Mol | CV<br>Cal/Mol-Kelvin | S<br>Cal/Mol-Kelvin |
|-------|-------------------------|----------------------|---------------------|
| Total | 200.707                 | 73.284               | 147.779             |

C,0,1.9210150065,2.6437592614,-0.2851455636  
C,0,0.5006545348,2.5996330607,-0.7443874588  
C,0,-0.6523937105,2.6229508257,0.035102116  
C,0,-1.9928269299,2.8614205939,-0.5980128928  
C,0,-0.652578715,2.6070061265,1.5362689614  
O,0,-0.3699849976,0.7026935594,-0.6401428629  
C,0,0.0960339751,-0.3668723686,0.2347920045  
N,0,-0.7453509861,-1.2481805827,-0.483131527  
S,0,-2.2979034781,-1.405386852,0.1635215979  
C,0,-3.2755877976,-1.4925451796,-1.3442310154  
O,0,-2.735024723,-0.216954002,0.9344154624  
O,0,-2.3710868209,-2.7196421561,0.8279781287  
H,0,0.3551394995,2.7006720837,-1.8170144857  
H,0,-0.1843544075,-0.1502900407,1.2718050423  
C,0,1.5622334695,-0.697515344,0.1191396537  
H,0,2.5295008939,1.9221742085,-0.8389014307  
H,0,2.0439687122,2.4481455773,0.7806881067  
H,0,2.3321784611,3.6407657424,-0.497596999  
H,0,-0.9483419457,3.5974764396,1.9068867155  
H,0,0.3164754254,2.3603315526,1.9722938448  
H,0,-1.4010038865,1.8918364469,1.8938301242  
H,0,-2.7106502697,2.1238402068,-0.2242408245

H,0,-1.9463305392,2.7998866339,-1.6877326366  
H,0,-2.3602019874,3.8586803504,-0.3205331337  
H,0,-4.3055705037,-1.6859805361,-1.0388069352  
H,0,-2.8894967418,-2.3116853585,-1.9511868317  
H,0,-3.1922958668,-0.5404173691,-1.8685952925  
C,0,2.359448921,-0.7407955942,1.2671409976  
C,0,3.7196680259,-1.055444992,1.1761173294  
C,0,4.2894755539,-1.3270051776,-0.0690772704  
C,0,3.4936260872,-1.289822908,-1.2211761167  
C,0,2.1372548503,-0.979762321,-1.1279878367  
H,0,1.9148417456,-0.5396068978,2.2391653321  
H,0,4.3282688081,-1.0915892825,2.0751089792  
H,0,5.3448547231,-1.5731271049,-0.1436608762  
H,0,3.9317966339,-1.5109859934,-2.1904209925  
H,0,1.5103870209,-0.9629335247,-2.0137407106

### B3LYP/6-31G\* (gas phase)

E(RB+HF-LYP) = -1185.24045395

|                                              |                             |
|----------------------------------------------|-----------------------------|
| Zero-point correction=                       | 0.302262 (Hartree/Particle) |
| Thermal correction to Energy=                | 0.321828                    |
| Thermal correction to Enthalpy=              | 0.322772                    |
| Thermal correction to Gibbs Free Energy=     | 0.253633                    |
| Sum of electronic and zero-point Energies=   | -1184.938192                |
| Sum of electronic and thermal Energies=      | -1184.918626                |
| Sum of electronic and thermal Enthalpies=    | -1184.917682                |
| Sum of electronic and thermal Free Energies= | -1184.986821                |

|       | E (Thermal)<br>KCAL/MOL | CV<br>CAL/MOL-KELVIN | S<br>CAL/MOL-KELVIN |
|-------|-------------------------|----------------------|---------------------|
| TOTAL | 201.950                 | 72.657               | 145.516             |

Standard orientation:

| Center<br>Number | Atomic<br>Number | Atomic<br>Type | Coordinates (Angstroms) |           |           |
|------------------|------------------|----------------|-------------------------|-----------|-----------|
|                  |                  |                | X                       | Y         | Z         |
| 1                | 6                | 0              | 0.501144                | 2.573305  | -0.747719 |
| 2                | 6                | 0              | -0.645385               | 2.577677  | 0.041462  |
| 3                | 8                | 0              | -0.374163               | 0.692654  | -0.628091 |
| 4                | 6                | 0              | 0.094068                | -0.374339 | 0.250502  |
| 5                | 7                | 0              | -0.744250               | -1.259708 | -0.462853 |
| 6                | 16               | 0              | -2.297793               | -1.396673 | 0.176003  |
| 7                | 8                | 0              | -2.710192               | -0.221374 | 0.977310  |
| 8                | 8                | 0              | -2.411750               | -2.726753 | 0.795226  |
| 9                | 6                | 0              | 1.926108                | 2.615853  | -0.303180 |
| 10               | 6                | 0              | -0.634416               | 2.555577  | 1.543029  |
| 11               | 6                | 0              | -1.991302               | 2.827128  | -0.578327 |
| 12               | 6                | 0              | -3.270038               | -1.403663 | -1.338553 |
| 13               | 1                | 0              | 0.345675                | 2.688315  | -1.817723 |
| 14               | 1                | 0              | -0.182928               | -0.153312 | 1.286941  |
| 15               | 6                | 0              | 1.560395                | -0.696296 | 0.125460  |
| 16               | 1                | 0              | 2.532786                | 1.911884  | -0.882084 |
| 17               | 1                | 0              | 2.061877                | 2.390553  | 0.755978  |
| 18               | 1                | 0              | 2.329725                | 3.621751  | -0.491524 |
| 19               | 1                | 0              | -0.926439               | 3.544523  | 1.922397  |
| 20               | 1                | 0              | 0.338695                | 2.305518  | 1.970429  |
| 21               | 1                | 0              | -1.379356               | 1.836366  | 1.900484  |
| 22               | 1                | 0              | -2.708458               | 2.090490  | -0.201047 |
| 23               | 1                | 0              | -1.954874               | 2.768702  | -1.669534 |
| 24               | 1                | 0              | -2.352381               | 3.826019  | -0.296319 |
| 25               | 1                | 0              | -4.310290               | -1.575368 | -1.052698 |

|    |   |   |           |           |           |
|----|---|---|-----------|-----------|-----------|
| 26 | 1 | 0 | -2.908552 | -2.210993 | -1.976931 |
| 27 | 1 | 0 | -3.156020 | -0.437840 | -1.832762 |
| 28 | 6 | 0 | 2.365743  | -0.750355 | 1.265884  |
| 29 | 6 | 0 | 3.725807  | -1.053758 | 1.159788  |
| 30 | 6 | 0 | 4.287413  | -1.301676 | -0.092218 |
| 31 | 6 | 0 | 3.484323  | -1.252173 | -1.237167 |
| 32 | 6 | 0 | 2.127889  | -0.953846 | -1.129606 |
| 33 | 1 | 0 | 1.926126  | -0.564701 | 2.243792  |
| 34 | 1 | 0 | 4.341812  | -1.097753 | 2.054003  |
| 35 | 1 | 0 | 5.344777  | -1.537644 | -0.178491 |
| 36 | 1 | 0 | 3.917942  | -1.453712 | -2.213307 |
| 37 | 1 | 0 | 1.492672  | -0.924899 | -2.009363 |

### B3LYP/6-31G\* (Onsager)

|                                              |                             |
|----------------------------------------------|-----------------------------|
| Zero-point correction=                       | 0.302147 (Hartree/Particle) |
| Thermal correction to Energy=                | 0.321792                    |
| Thermal correction to Enthalpy=              | 0.322736                    |
| Thermal correction to Gibbs Free Energy=     | 0.253173                    |
| Sum of electronic and zero-point Energies=   | -1184.942755                |
| Sum of electronic and thermal Energies=      | -1184.923111                |
| Sum of electronic and thermal Enthalpies=    | -1184.922167                |
| Sum of electronic and thermal Free Energies= | -1184.991730                |

|       | E (Thermal)<br>KCAL/MOL | CV<br>CAL/MOL-KELVIN | S<br>CAL/MOL-KELVIN |
|-------|-------------------------|----------------------|---------------------|
| TOTAL | 201.928                 | 72.714               | 146.408             |

Standard orientation:

| Center<br>Number | Atomic<br>Number | Atomic<br>Type |   | Coordinates (Angstroms) |           |           |
|------------------|------------------|----------------|---|-------------------------|-----------|-----------|
|                  |                  |                |   | X                       | Y         | Z         |
| 1                | 6                | 0              | C | 0.492505                | 2.528534  | -0.808689 |
| 2                | 6                | 0              | C | -0.591403               | 2.600129  | 0.055371  |
| 3                | 8                | 0              | O | -0.398484               | 0.621674  | -0.615605 |
| 4                | 6                | 0              | C | 0.087786                | -0.405808 | 0.276731  |
| 5                | 7                | 0              | N | -0.759028               | -1.304789 | -0.425944 |
| 6                | 16               | 0              | S | -2.331671               | -1.389498 | 0.171097  |
| 7                | 8                | 0              | O | -2.661707               | -0.318033 | 1.137147  |
| 8                | 8                | 0              | O | -2.568785               | -2.785724 | 0.579709  |
| 9                | 6                | 0              | C | 1.945145                | 2.556786  | -0.465456 |
| 10               | 6                | 0              | C | -0.475237               | 2.613377  | 1.551725  |
| 11               | 6                | 0              | C | -1.972799               | 2.847948  | -0.478794 |
| 12               | 6                | 0              | C | -3.282860               | -1.094248 | -1.330515 |
| 13               | 1                | 0              | H | 0.265299                | 2.613400  | -1.868753 |
| 14               | 1                | 0              | H | -0.189821               | -0.179786 | 1.311747  |
| 15               | 6                | 0              | C | 1.552809                | -0.731240 | 0.148698  |
| 16               | 1                | 0              | H | 2.505718                | 1.859822  | -1.095940 |
| 17               | 1                | 0              | H | 2.154242                | 2.318135  | 0.578532  |
| 18               | 1                | 0              | H | 2.338555                | 3.563210  | -0.670429 |
| 19               | 1                | 0              | H | -0.730825               | 3.613894  | 1.927123  |
| 20               | 1                | 0              | H | 0.523741                | 2.364965  | 1.915282  |
| 21               | 1                | 0              | H | -1.200374               | 1.912988  | 1.981897  |
| 22               | 1                | 0              | H | -2.674931               | 2.132700  | -0.035891 |
| 23               | 1                | 0              | H | -2.010574               | 2.764137  | -1.568242 |
| 24               | 1                | 0              | H | -2.304814               | 3.857709  | -0.200154 |
| 25               | 1                | 0              | H | -4.338430               | -1.213082 | -1.074753 |
| 26               | 1                | 0              | H | -2.981999               | -1.829189 | -2.078512 |
| 27               | 1                | 0              | H | -3.078075               | -0.082058 | -1.680554 |
| 28               | 6                | 0              | C | 2.371529                | -0.732308 | 1.280918  |
| 29               | 6                | 0              | C | 3.734954                | -1.018419 | 1.169777  |

|    |   |   |   |          |           |           |
|----|---|---|---|----------|-----------|-----------|
| 30 | 6 | 0 | C | 4.285687 | -1.304622 | -0.079011 |
| 31 | 6 | 0 | C | 3.468805 | -1.310872 | -1.215143 |
| 32 | 6 | 0 | C | 2.109549 | -1.027672 | -1.102579 |
| 33 | 1 | 0 | H | 1.941853 | -0.508041 | 2.255283  |
| 34 | 1 | 0 | H | 4.364165 | -1.010704 | 2.055773  |
| 35 | 1 | 0 | H | 5.347132 | -1.518587 | -0.170703 |
| 36 | 1 | 0 | H | 3.896055 | -1.534537 | -2.189128 |
| 37 | 1 | 0 | H | 1.465987 | -1.032322 | -1.976717 |

---

## Epoxidation TS Isomer 3 + cis-Phenyl

### B3LYP/6-31+G\*\* (PCM)

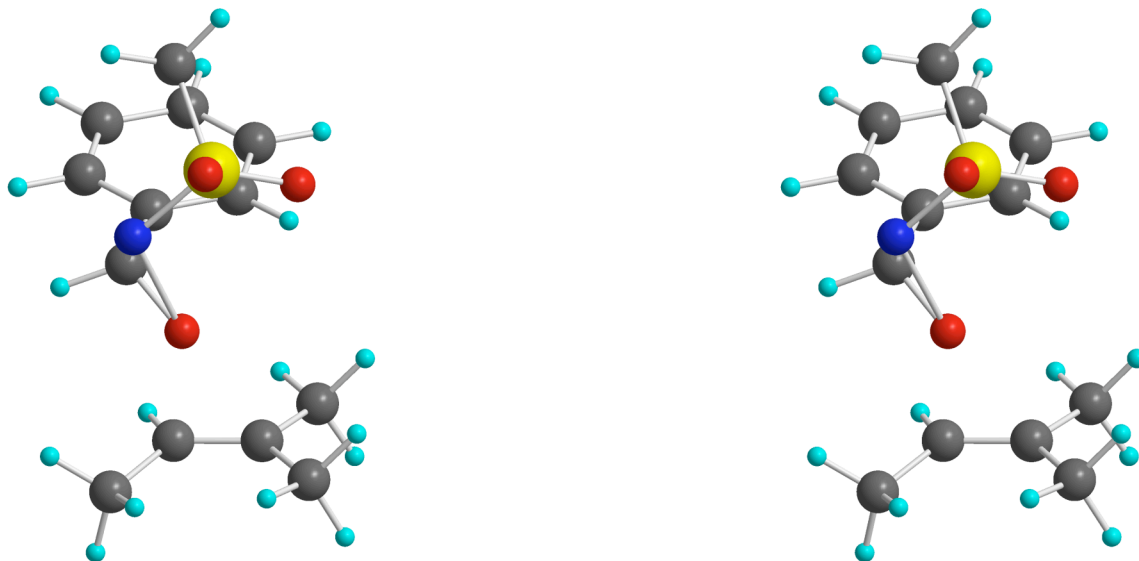

Filename: b3BBPCmts3cisfreq  
 E(RB+HF-LYP) = -1185.30104674

|                                              |                             |
|----------------------------------------------|-----------------------------|
| Zero-point correction=                       | 0.298591 (Hartree/Particle) |
| Thermal correction to Energy=                | 0.317900                    |
| Thermal correction to Enthalpy=              | 0.318844                    |
| Thermal correction to Gibbs Free Energy=     | 0.250056                    |
| Sum of electronic and zero-point Energies=   | -1185.002455                |
| Sum of electronic and thermal Energies=      | -1184.983147                |
| Sum of electronic and thermal Enthalpies=    | -1184.982202                |
| Sum of electronic and thermal Free Energies= | -1185.050991                |

|       | E (Thermal) |         | CV             |           | S              |
|-------|-------------|---------|----------------|-----------|----------------|
|       | KCal/Mol    |         | Cal/Mol-Kelvin |           | Cal/Mol-Kelvin |
| Total |             | 199.485 |                | 71.533    | 144.778        |
| 1     | 6           | 0       | 0.892059       | 1.308474  | -0.858763      |
| 2     | 6           | 0       | 0.849454       | 1.046974  | 0.518449       |
| 3     | 6           | 0       | 1.579204       | 1.870056  | 1.391244       |
| 4     | 6           | 0       | 2.354215       | 2.923553  | 0.899254       |
| 5     | 6           | 0       | 2.394973       | 3.175296  | -0.475515      |
| 6     | 6           | 0       | 1.660374       | 2.367214  | -1.349958      |
| 7     | 8           | 0       | 0.804386       | -1.664764 | -1.555429      |
| 8     | 16          | 0       | 1.215978       | -2.160757 | -0.225344      |
| 9     | 7           | 0       | 0.404260       | -1.469286 | 1.093826       |
| 10    | 6           | 0       | 0.045662       | -0.075288 | 1.138348       |
| 11    | 8           | 0       | -1.135143      | -0.523903 | 0.486325       |
| 12    | 6           | 0       | 2.940686       | -1.688143 | 0.043087       |

|    |   |   |           |           |           |
|----|---|---|-----------|-----------|-----------|
| 13 | 8 | 0 | 1.121766  | -3.615597 | 0.013089  |
| 14 | 6 | 0 | -2.747786 | 0.779810  | 0.772349  |
| 15 | 6 | 0 | -2.971913 | 0.553078  | -0.573287 |
| 16 | 6 | 0 | -3.717163 | -0.636503 | -1.093499 |
| 17 | 6 | 0 | -3.402565 | 0.083135  | 1.927154  |
| 18 | 6 | 0 | -2.510459 | 1.537553  | -1.604362 |
| 19 | 1 | 0 | -2.230438 | 1.707213  | 1.020943  |
| 20 | 1 | 0 | -0.145476 | 0.168786  | 2.192663  |
| 21 | 1 | 0 | -2.717381 | 0.025999  | 2.778484  |
| 22 | 1 | 0 | -3.729728 | -0.929159 | 1.685411  |
| 23 | 1 | 0 | -4.278686 | 0.658823  | 2.255926  |
| 24 | 1 | 0 | -4.670742 | -0.311598 | -1.533525 |
| 25 | 1 | 0 | -3.928691 | -1.383965 | -0.329090 |
| 26 | 1 | 0 | -3.145785 | -1.113000 | -1.898456 |
| 27 | 1 | 0 | -1.945929 | 1.041040  | -2.401885 |
| 28 | 1 | 0 | -1.900918 | 2.336661  | -1.178265 |
| 29 | 1 | 0 | -3.389729 | 1.991767  | -2.083576 |
| 30 | 1 | 0 | 3.520158  | -2.211637 | -0.721493 |
| 31 | 1 | 0 | 3.235947  | -2.015875 | 1.040854  |
| 32 | 1 | 0 | 3.036670  | -0.608231 | -0.068560 |
| 33 | 1 | 0 | 1.539697  | 1.684311  | 2.464219  |
| 34 | 1 | 0 | 2.916730  | 3.549962  | 1.588587  |
| 35 | 1 | 0 | 2.992276  | 3.998218  | -0.863156 |
| 36 | 1 | 0 | 1.686294  | 2.559152  | -2.420880 |
| 37 | 1 | 0 | 0.341738  | 0.671504  | -1.538372 |

### B3LYP/6-31+G\*\* (gas phase)

Filename: b3BBts3cis

E(RB+HF-LYP) = -1185.28779736

|                                              |                             |
|----------------------------------------------|-----------------------------|
| Zero-point correction=                       | 0.299716 (Hartree/Particle) |
| Thermal correction to Energy=                | 0.319779                    |
| Thermal correction to Enthalpy=              | 0.320723                    |
| Thermal correction to Gibbs Free Energy=     | 0.249408                    |
| Sum of electronic and zero-point Energies=   | -1184.988082                |
| Sum of electronic and thermal Energies=      | -1184.968018                |
| Sum of electronic and thermal Enthalpies=    | -1184.967074                |
| Sum of electronic and thermal Free Energies= | -1185.038389                |

|       | E (Thermal) | CV             | S              |
|-------|-------------|----------------|----------------|
|       | KCal/Mol    | Cal/Mol-Kelvin | Cal/Mol-Kelvin |
| Total | 200.664     | 73.270         | 150.095        |

C,0,-2.8451099191,-1.5606190823,-0.088629411  
 C,0,-1.5904438971,-1.7289935415,-0.89838086  
 C,0,-0.4516242972,-2.4268657556,-0.517538106  
 C,0,0.5785367204,-2.8243332805,-1.5287993706  
 C,0,-0.1580940379,-2.8011309557,0.9024380701  
 O,0,-0.6497618735,-0.0965024733,-0.3716992333  
 C,0,-0.431750905,0.9228057581,-1.3655594745  
 N,0,-0.408039621,1.8365270529,-0.2763477196  
 S,0,1.0208339676,2.2433401398,0.5285535171  
 C,0,0.2770498476,3.0917584626,1.9312382568  
 O,0,1.7502996862,3.2432823976,-0.2761638784  
 O,0,1.7766105694,1.0894733401,1.0599037403  
 H,0,-1.7042054565,-1.559470306,-1.9685441304  
 H,0,-1.356880234,1.1046937404,-1.9291303012  
 C,0,0.6965228536,0.7145132364,-2.3542468897  
 H,0,-3.3798096723,-0.6617471844,-0.4064690898

```

H,0,-2.6407656625,-1.4662002242,0.9789699819
H,0,-3.5135517721,-2.4185603414,-0.2413479586
H,0,0.263879725,-3.8116274532,0.9552499414
H,0,-1.029903373,-2.7496747158,1.555633585
H,0,0.6021608013,-2.1137631474,1.2992472397
H,0,1.5853909082,-2.5406798798,-1.2025150474
H,0,0.3957348859,-2.3863003712,-2.5117399161
H,0,0.5781058025,-3.9194645304,-1.6302487927
H,0,1.1068558833,3.4570236727,2.5389363814
H,0,-0.3290440385,2.3764137863,2.4873109008
H,0,-0.3282935688,3.9177103347,1.5585053165
C,0,0.4307941846,0.9946850977,-3.7020070363
C,0,1.4175381797,0.832650639,-4.6777894586
C,0,2.687410006,0.382425735,-4.3115879919
C,0,2.9595299108,0.0971389398,-2.9696056725
C,0,1.9737577729,0.2580473368,-1.9953785475
H,0,-0.5555989873,1.3505841396,-3.9908618394
H,0,1.1945928604,1.0600042875,-5.7162712787
H,0,3.4610361555,0.2581995378,-5.0640000335
H,0,3.9483779346,-0.2448123221,-2.6772748446
H,0,2.1974806604,0.05006893,-0.9554220486

```

## Epoxidation TS Isomer 5 + cis-Phenyl

### B3LYP/6-31+G\*\* (PCM)

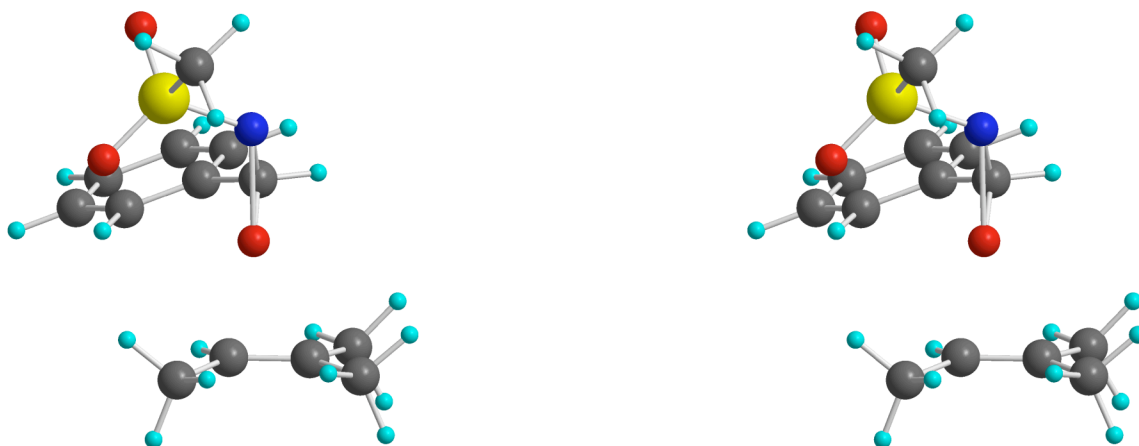

Filename: b3BBPCMts5cisfreq

E(RB+HF-LYP) = -1185.30484579

```

Zero-point correction= 0.298717 (Hartree/Particle)
Thermal correction to Energy= 0.318978
Thermal correction to Enthalpy= 0.319922
Thermal correction to Gibbs Free Energy= 0.248231
Sum of electronic and zero-point Energies= -1185.006128
Sum of electronic and thermal Energies= -1184.985868
Sum of electronic and thermal Enthalpies= -1184.984924
Sum of electronic and thermal Free Energies= -1185.056614

```

|       | E (Thermal) | CV             | S              |
|-------|-------------|----------------|----------------|
|       | KCal/Mol    | Cal/Mol-Kelvin | Cal/Mol-Kelvin |
| Total | 200.162     | 73.591         | 150.885        |
| 1     | 6           | 0              | 0.738181       |
| 2     | 6           | 0              | 0.494602       |
|       |             |                | 1.427559       |
|       |             |                | 1.275646       |
|       |             |                | 0.979299       |
|       |             |                | -0.393976      |

|    |    |   |           |           |           |
|----|----|---|-----------|-----------|-----------|
| 3  | 6  | 0 | 0.753794  | 2.353001  | -1.253730 |
| 4  | 6  | 0 | 1.260420  | 3.557766  | -0.758470 |
| 5  | 6  | 0 | 1.501155  | 3.701300  | 0.610651  |
| 6  | 6  | 0 | 1.236417  | 2.633857  | 1.476044  |
| 7  | 6  | 0 | -0.056960 | 0.010700  | -1.017226 |
| 8  | 7  | 0 | 0.670108  | -1.219274 | -1.145585 |
| 9  | 16 | 0 | 1.855437  | -1.676708 | -0.039377 |
| 10 | 8  | 0 | 3.130617  | -1.031562 | -0.438605 |
| 11 | 8  | 0 | -0.972515 | -0.782888 | -0.260564 |
| 12 | 6  | 0 | 1.957955  | -3.419546 | -0.467883 |
| 13 | 8  | 0 | 1.476530  | -1.588229 | 1.388586  |
| 14 | 6  | 0 | -2.423554 | 0.051936  | 0.996355  |
| 15 | 6  | 0 | -3.149942 | -0.082206 | -0.172595 |
| 16 | 6  | 0 | -3.906167 | -1.321380 | -0.546103 |
| 17 | 6  | 0 | -2.357102 | -0.909834 | 2.140138  |
| 18 | 6  | 0 | -3.287895 | 1.078294  | -1.115727 |
| 19 | 1  | 0 | -1.990764 | 1.031408  | 1.185899  |
| 20 | 1  | 0 | -0.464006 | 0.251651  | -2.007811 |
| 21 | 1  | 0 | -1.336887 | -0.956317 | 2.532343  |
| 22 | 1  | 0 | -2.663965 | -1.921336 | 1.869066  |
| 23 | 1  | 0 | -3.008817 | -0.560652 | 2.952634  |
| 24 | 1  | 0 | -4.984324 | -1.139797 | -0.430641 |
| 25 | 1  | 0 | -3.639932 | -2.187214 | 0.060302  |
| 26 | 1  | 0 | -3.737903 | -1.567951 | -1.600103 |
| 27 | 1  | 0 | -3.016763 | 0.789218  | -2.138526 |
| 28 | 1  | 0 | -2.681528 | 1.935459  | -0.814060 |
| 29 | 1  | 0 | -4.338945 | 1.396686  | -1.153838 |
| 30 | 1  | 0 | 2.753526  | -3.840906 | 0.150250  |
| 31 | 1  | 0 | 2.198680  | -3.506745 | -1.527678 |
| 32 | 1  | 0 | 0.999102  | -3.887089 | -0.241166 |
| 33 | 1  | 0 | 0.559329  | 2.248500  | -2.320580 |
| 34 | 1  | 0 | 1.460834  | 4.381715  | -1.440302 |
| 35 | 1  | 0 | 1.891842  | 4.638449  | 1.002219  |
| 36 | 1  | 0 | 1.423548  | 2.737718  | 2.543029  |
| 37 | 1  | 0 | 0.556750  | 0.598317  | 1.652093  |

### B3LYP/6-31+G\*\* (gas phase)

E(RB+HF-LYP) = -1185.28906824

|                                              |                             |
|----------------------------------------------|-----------------------------|
| Zero-point correction=                       | 0.299722 (Hartree/Particle) |
| Thermal correction to Energy=                | 0.319880                    |
| Thermal correction to Enthalpy=              | 0.320824                    |
| Thermal correction to Gibbs Free Energy=     | 0.249687                    |
| Sum of electronic and zero-point Energies=   | -1184.989347                |
| Sum of electronic and thermal Energies=      | -1184.969189                |
| Sum of electronic and thermal Enthalpies=    | -1184.968244                |
| Sum of electronic and thermal Free Energies= | -1185.039381                |

|       | E (Thermal) | CV             | S              |
|-------|-------------|----------------|----------------|
|       | KCal/Mol    | Cal/Mol-Kelvin | Cal/Mol-Kelvin |
| Total | 200.728     | 73.370         | 149.719        |

C,0,-0.6407985986,-2.3469754229,1.8232384346  
 C,0,0.0529832511,-2.4058195876,0.498285537  
 C,0,1.4214591107,-2.4356438435,0.261460833  
 C,0,1.9477118361,-2.754504654,-1.1087235338  
 C,0,2.453818459,-2.2328469277,1.3294768186  
 O,0,0.4014343505,-0.4826033736,0.1623900952  
 C,0,0.1715262771,0.1714522342,-1.1086439508  
 N,0,0.0961197617,1.38578624,-0.3759780847  
 S,0,-1.3659565968,1.940957281,0.2555648206



C,0,-0.7000308011,3.1972671957,1.359459225  
 O,0,-2.0943598628,0.9595867907,1.0905701537  
 O,0,-2.1170512702,2.6258101402,-0.81561606  
 H,0,-0.5857181157,-2.6515362809,-0.3462444007  
 C,0,-0.9262633916,-0.3785995562,-1.9994394034  
 H,0,1.103310668,0.1943231683,-1.6873218753  
 H,0,-1.4730130803,-1.6386506629,1.7726926479  
 H,0,0.0158562133,-2.0368179165,2.6374706651  
 H,0,-1.0495050423,-3.3361395507,2.0686072145  
 H,0,2.9363457135,-3.1924615665,1.5646130264  
 H,0,2.0403484225,-1.8234135727,2.2508443612  
 H,0,3.2408404079,-1.5588798391,0.9748413812  
 H,0,2.665131847,-1.9944361761,-1.4410153236  
 H,0,1.1519983713,-2.8397322478,-1.8521840558  
 H,0,2.4959893373,-3.7065059242,-1.0807372026  
 H,0,-1.5614631448,3.6873126887,1.8167063585  
 H,0,-0.1154424755,3.9035479301,0.7702975202  
 H,0,-0.0839637351,2.7062596328,2.1129528117  
 C,0,-0.6481727294,-0.4740304758,-3.3703036423  
 C,0,-1.6016649963,-0.9649694274,-4.2658041633  
 C,0,-2.8489602422,-1.3780874255,-3.7943437544  
 C,0,-3.134020219,-1.2907192273,-2.4279560618  
 C,0,-2.183933128,-0.7939647376,-1.5345790692  
 H,0,0.3216031466,-0.152742528,-3.7433614188  
 H,0,-1.3692314487,-1.0232496149,-5.3252547475  
 H,0,-3.5952583764,-1.7604575851,-4.4848157855  
 H,0,-4.1063170883,-1.5996424981,-2.0549398927  
 H,0,-2.4272258305,-0.7012826793,-0.4826094784

### B3LYP/6-31G\* (gas phase)

E(RB+HF-LYP) = -1185.23169719

|                                              |                             |
|----------------------------------------------|-----------------------------|
| Zero-point correction=                       | 0.301996 (Hartree/Particle) |
| Thermal correction to Energy=                | 0.321851                    |
| Thermal correction to Enthalpy=              | 0.322795                    |
| Thermal correction to Gibbs Free Energy=     | 0.252972                    |
| Sum of electronic and zero-point Energies=   | -1184.929701                |
| Sum of electronic and thermal Energies=      | -1184.909846                |
| Sum of electronic and thermal Enthalpies=    | -1184.908902                |
| Sum of electronic and thermal Free Energies= | -1184.978725                |

|       |             |                |                |
|-------|-------------|----------------|----------------|
|       | E (Thermal) | CV             | S              |
|       | KCAL/MOL    | CAL/MOL-KELVIN | CAL/MOL-KELVIN |
| TOTAL | 201.965     | 72.762         | 146.955        |

Standard orientation:

| Center Number | Atomic Number | Atomic Type | Coordinates (Angstroms) |           |           |
|---------------|---------------|-------------|-------------------------|-----------|-----------|
|               |               |             | X                       | Y         | Z         |
| 1             | 6             | 0           | -2.134497               | -0.631210 | 1.024966  |
| 2             | 6             | 0           | -2.938122               | -0.865929 | -0.082989 |
| 3             | 8             | 0           | -0.766462               | -1.014466 | -0.326803 |
| 4             | 6             | 0           | -0.042625               | 0.002406  | -1.059052 |
| 5             | 7             | 0           | 0.984611                | -0.962623 | -1.221604 |
| 6             | 16            | 0           | 2.195940                | -1.145685 | -0.069634 |
| 7             | 8             | 0           | 1.715491                | -1.318107 | 1.318878  |
| 8             | 8             | 0           | 3.248294                | -0.144418 | -0.316598 |
| 9             | 6             | 0           | -1.752007               | -1.601611 | 2.099158  |
| 10            | 6             | 0           | -3.421519               | -2.227115 | -0.485735 |
| 11            | 6             | 0           | -3.430408               | 0.281421  | -0.918418 |
| 12            | 6             | 0           | 2.806135                | -2.749510 | -0.614104 |
| 13            | 1             | 0           | -1.919768               | 0.409983  | 1.251800  |

|    |   |   |           |           |           |
|----|---|---|-----------|-----------|-----------|
| 14 | 1 | 0 | -0.510494 | 0.149317  | -2.040986 |
| 15 | 6 | 0 | 0.121294  | 1.364860  | -0.411882 |
| 16 | 1 | 0 | -0.675274 | -1.531360 | 2.285250  |
| 17 | 1 | 0 | -1.985427 | -2.637385 | 1.844103  |
| 18 | 1 | 0 | -2.280232 | -1.350750 | 3.028872  |
| 19 | 1 | 0 | -4.497096 | -2.321033 | -0.274685 |
| 20 | 1 | 0 | -2.900714 | -3.034592 | 0.029915  |
| 21 | 1 | 0 | -3.295976 | -2.371665 | -1.564781 |
| 22 | 1 | 0 | -3.226977 | 0.109876  | -1.983010 |
| 23 | 1 | 0 | -2.981562 | 1.233696  | -0.624599 |
| 24 | 1 | 0 | -4.522374 | 0.370586  | -0.822081 |
| 25 | 1 | 0 | 3.656104  | -2.994299 | 0.026726  |
| 26 | 1 | 0 | 3.117398  | -2.674675 | -1.656595 |
| 27 | 1 | 0 | 2.010069  | -3.486196 | -0.497924 |
| 28 | 6 | 0 | 0.495917  | 1.564690  | 0.926142  |
| 29 | 6 | 0 | 0.605521  | 2.856989  | 1.437865  |
| 30 | 6 | 0 | 0.348400  | 3.967127  | 0.629687  |
| 31 | 6 | 0 | -0.021619 | 3.778748  | -0.701404 |
| 32 | 6 | 0 | -0.138349 | 2.485291  | -1.212654 |
| 33 | 1 | 0 | 0.724320  | 0.711783  | 1.554816  |
| 34 | 1 | 0 | 0.902410  | 2.996542  | 2.473929  |
| 35 | 1 | 0 | 0.439865  | 4.971305  | 1.035126  |
| 36 | 1 | 0 | -0.221180 | 4.633683  | -1.341940 |
| 37 | 1 | 0 | -0.427724 | 2.343483  | -2.251867 |

## Epoxidation TS Isomer 7 + cis-Phenyl

### B3LYP/6-31+G\*\* (PCM)

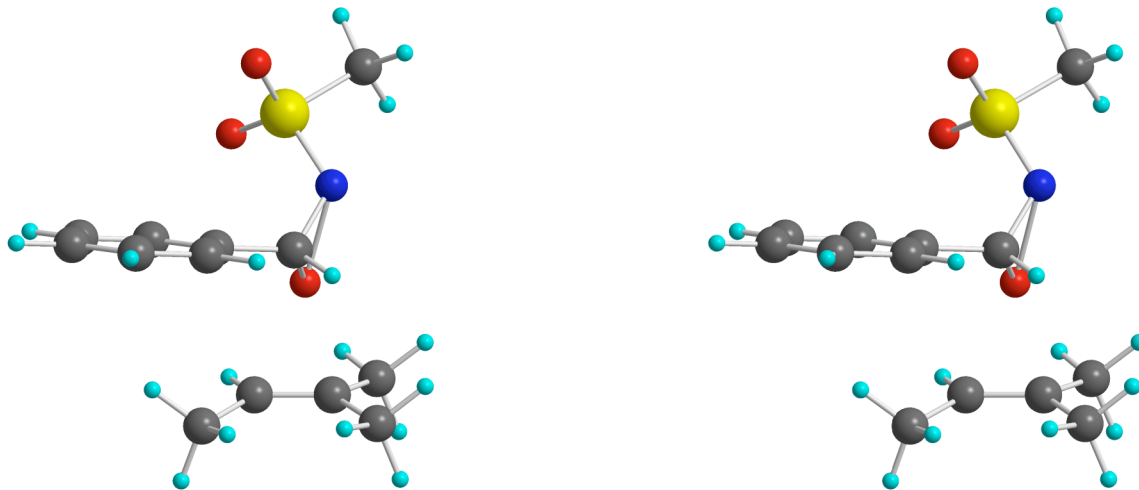

Filename: b3BBPCMts7cisfreq  
 E(RB+HF-LYP) = -1185.30159596

|                                              |                             |
|----------------------------------------------|-----------------------------|
| Zero-point correction=                       | 0.298892 (Hartree/Particle) |
| Thermal correction to Energy=                | 0.318871                    |
| Thermal correction to Enthalpy=              | 0.319815                    |
| Thermal correction to Gibbs Free Energy=     | 0.249614                    |
| Sum of electronic and zero-point Energies=   | -1185.002704                |
| Sum of electronic and thermal Energies=      | -1184.982725                |
| Sum of electronic and thermal Enthalpies=    | -1184.981781                |
| Sum of electronic and thermal Free Energies= | -1185.051982                |

|       | E (Thermal) | CV             | S              |
|-------|-------------|----------------|----------------|
|       | KCal/Mol    | Cal/Mol-Kelvin | Cal/Mol-Kelvin |
| Total | 200.095     | 73.550         | 147.751        |

|    |    |   |           |           |           |
|----|----|---|-----------|-----------|-----------|
| 1  | 6  | 0 | -2.706801 | 1.742756  | -0.813359 |
| 2  | 6  | 0 | -2.687440 | 0.259469  | -0.978482 |
| 3  | 6  | 0 | -3.086217 | -0.693497 | -0.054098 |
| 4  | 6  | 0 | -3.316092 | -2.112114 | -0.494483 |
| 5  | 6  | 0 | -3.546554 | -0.364829 | 1.337219  |
| 6  | 8  | 0 | -0.996897 | -0.834746 | 0.000861  |
| 7  | 6  | 0 | -0.126538 | -0.121101 | 0.889767  |
| 8  | 7  | 0 | 0.632826  | -1.333233 | 0.936368  |
| 9  | 16 | 0 | 1.921336  | -1.633877 | -0.099296 |
| 10 | 6  | 0 | 2.112184  | -3.392289 | 0.225948  |
| 11 | 8  | 0 | 3.125615  | -0.942177 | 0.425049  |
| 12 | 8  | 0 | 1.636031  | -1.478096 | -1.543889 |
| 13 | 1  | 0 | -2.456209 | -0.101864 | -1.979951 |
| 14 | 1  | 0 | -1.824784 | 2.199797  | -1.269627 |
| 15 | 1  | 0 | -2.772285 | 2.071927  | 0.225177  |
| 16 | 1  | 0 | -3.582603 | 2.140460  | -1.347849 |
| 17 | 1  | 0 | -4.641291 | -0.443280 | 1.383370  |
| 18 | 1  | 0 | -3.268938 | 0.637678  | 1.666110  |
| 19 | 1  | 0 | -3.145868 | -1.093324 | 2.049804  |
| 20 | 1  | 0 | -2.925820 | -2.816638 | 0.246085  |
| 21 | 1  | 0 | -2.848827 | -2.318407 | -1.459903 |
| 22 | 1  | 0 | -4.396026 | -2.292412 | -0.585329 |
| 23 | 1  | 0 | -0.593636 | 0.017090  | 1.873649  |
| 24 | 6  | 0 | 0.443137  | 1.200446  | 0.420198  |
| 25 | 1  | 0 | 2.972847  | -3.719902 | -0.361013 |
| 26 | 1  | 0 | 1.204374  | -3.903478 | -0.096069 |
| 27 | 1  | 0 | 2.288860  | -3.536369 | 1.292084  |
| 28 | 6  | 0 | 0.663868  | 2.189797  | 1.388179  |
| 29 | 6  | 0 | 1.196914  | 3.431981  | 1.031692  |
| 30 | 6  | 0 | 1.506079  | 3.698545  | -0.304837 |
| 31 | 6  | 0 | 1.279134  | 2.717914  | -1.277414 |
| 32 | 6  | 0 | 0.750705  | 1.475754  | -0.920164 |
| 33 | 1  | 0 | 0.418988  | 1.986892  | 2.430269  |
| 34 | 1  | 0 | 1.365976  | 4.188281  | 1.795553  |
| 35 | 1  | 0 | 1.919085  | 4.664534  | -0.588657 |
| 36 | 1  | 0 | 1.517059  | 2.919790  | -2.320022 |
| 37 | 1  | 0 | 0.585665  | 0.717035  | -1.676688 |

### B3LYP/6-31+G\*\* (gas phase)

Filename: b3BBts7cis

E(RB+HF-LYP) = -1185.28417982

|                                              |                             |
|----------------------------------------------|-----------------------------|
| Zero-point correction=                       | 0.299732 (Hartree/Particle) |
| Thermal correction to Energy=                | 0.319700                    |
| Thermal correction to Enthalpy=              | 0.320644                    |
| Thermal correction to Gibbs Free Energy=     | 0.250122                    |
| Sum of electronic and zero-point Energies=   | -1184.984448                |
| Sum of electronic and thermal Energies=      | -1184.964480                |
| Sum of electronic and thermal Enthalpies=    | -1184.963536                |
| Sum of electronic and thermal Free Energies= | -1185.034058                |

|       | E (Thermal) | CV             | S              |
|-------|-------------|----------------|----------------|
|       | KCal/Mol    | Cal/Mol-Kelvin | Cal/Mol-Kelvin |
| Total | 200.615     | 73.482         | 148.426        |

C,0,2.8712322419,0.7156534443,1.3629748653  
C,0,2.468936517,-0.7139183001,1.230400222  
C,0,2.6574290196,-1.5542939222,0.1363286679  
C,0,2.5196073568,-3.0436099781,0.3120430329  
C,0,3.3209724623,-1.1119140311,-1.1398275874  
O,0,0.7303921063,-1.1328936211,0.0127238155

C,0,0.1406465878,-0.1746198746,-0.9151648784  
 N,0,-0.9475872642,-1.0683256003,-1.0542101429  
 S,0,-2.3245437983,-0.9643440574,-0.0878304504  
 C,0,-3.0923417646,-2.5133941385,-0.5913916403  
 O,0,-3.1734753009,0.1421882983,-0.5752256702  
 O,0,-2.0638755614,-1.0521880663,1.3643829423  
 H,0,2.0698746613,-1.1788878276,2.1284595447  
 H,0,2.0925839483,1.2965022286,1.8650244071  
 H,0,3.1000137103,1.1991154015,0.4121357689  
 H,0,3.7692262232,0.7709412319,1.9965034934  
 H,0,4.3753060162,-1.4185053587,-1.1257031363  
 H,0,3.2884448688,-0.0324802624,-1.2949582333  
 H,0,2.8561389442,-1.6041458072,-1.9996392261  
 H,0,2.054982059,-3.4960113712,-0.5684343307  
 H,0,1.9161349462,-3.2895366461,1.1882606551  
 H,0,3.5144531,-3.4926195187,0.4362313149  
 H,0,0.7043414929,-0.1805502684,-1.8560297413  
 C,0,0.0185643586,1.2562499084,-0.4329477263  
 H,0,-4.0438385737,-2.5660571892,-0.0592688133  
 H,0,-2.4374265766,-3.3352742808,-0.3016623999  
 H,0,-3.2480980156,-2.4925501153,-1.6697641876  
 C,0,0.362587196,2.2728248516,-1.3339047085  
 C,0,0.2667588899,3.6186196896,-0.9694863462  
 C,0,-0.1739078167,3.9608615837,0.3101653573  
 C,0,-0.5157904102,2.951533455,1.2165203694  
 C,0,-0.419894232,1.6078537748,0.8528770878  
 H,0,0.699024048,2.0110130883,-2.3347306565  
 H,0,0.5317421542,4.3930739281,-1.6835937546  
 H,0,-0.2548990184,5.004866966,0.599198343  
 H,0,-0.8687581129,3.2112427352,2.2105710038  
 H,0,-0.7041554715,0.8328911669,1.5560278027

## Epoxidation TS Isomer 8 + cis-Phenyl

B3LYP/6-31+G\*\* (PCM)

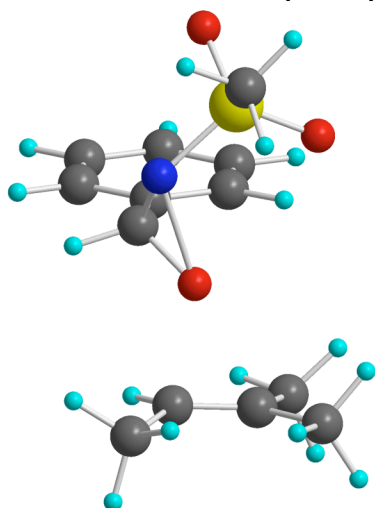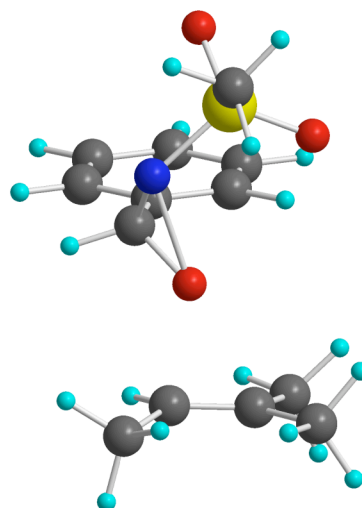

Filename: b3BBPCMts8cisfreq  
 E(RB+HF-LYP) = -1185.30329038

|                                            |                             |
|--------------------------------------------|-----------------------------|
| Zero-point correction=                     | 0.298644 (Hartree/Particle) |
| Thermal correction to Energy=              | 0.318887                    |
| Thermal correction to Enthalpy=            | 0.319832                    |
| Thermal correction to Gibbs Free Energy=   | 0.247857                    |
| Sum of electronic and zero-point Energies= | -1185.004646                |

Sum of electronic and thermal Energies= -1184.984403  
 Sum of electronic and thermal Enthalpies= -1184.983459  
 Sum of electronic and thermal Free Energies= -1185.055434

| Total | E (Thermal) |   | CV             |           | S              |
|-------|-------------|---|----------------|-----------|----------------|
|       | KCal/Mol    |   | Cal/Mol-Kelvin |           | Cal/Mol-Kelvin |
|       | 200.105     |   | 73.529         |           | 151.484        |
| 1     | 6           | 0 | -2.796428      | 0.491827  | 0.797648       |
| 2     | 6           | 0 | -2.938628      | 0.436171  | -0.577603      |
| 3     | 8           | 0 | -1.071631      | -0.596186 | 0.473789       |
| 4     | 6           | 0 | 0.076723       | -0.064572 | 1.137469       |
| 5     | 7           | 0 | 0.561759       | -1.409604 | 1.052182       |
| 6     | 6           | 0 | 0.768313       | 1.140416  | 0.538930       |
| 7     | 6           | 0 | 0.885255       | 1.363149  | -0.840443      |
| 8     | 6           | 0 | 1.537743       | 2.502779  | -1.314799      |
| 9     | 6           | 0 | 2.081145       | 3.432374  | -0.420937      |
| 10    | 6           | 0 | 1.964388       | 3.219327  | 0.955476       |
| 11    | 6           | 0 | 1.305949       | 2.081409  | 1.429571       |
| 12    | 16          | 0 | 1.512794       | -1.948400 | -0.231379      |
| 13    | 8           | 0 | 2.914088       | -1.535714 | 0.026929       |
| 14    | 6           | 0 | -3.446755      | -0.403662 | 1.810633       |
| 15    | 6           | 0 | -3.544207      | -0.728456 | -1.297776      |
| 16    | 6           | 0 | -2.506835      | 1.582517  | -1.440447      |
| 17    | 8           | 0 | 0.972105       | -1.691284 | -1.584625      |
| 18    | 6           | 0 | 1.388923       | -3.715138 | 0.075584       |
| 19    | 1           | 0 | -2.379079      | 1.416456  | 1.197419       |
| 20    | 1           | 0 | -0.138868      | 0.140435  | 2.195288       |
| 21    | 1           | 0 | -2.819223      | -0.486402 | 2.702851       |
| 22    | 1           | 0 | -3.631905      | -1.409811 | 1.431458       |
| 23    | 1           | 0 | -4.406753      | 0.027599  | 2.126014       |
| 24    | 1           | 0 | -2.824555      | -1.123861 | -2.025601      |
| 25    | 1           | 0 | -4.421149      | -0.398043 | -1.871002      |
| 26    | 1           | 0 | -3.848257      | -1.539861 | -0.636862      |
| 27    | 1           | 0 | -1.877916      | 1.238807  | -2.269470      |
| 28    | 1           | 0 | -1.968255      | 2.349138  | -0.880556      |
| 29    | 1           | 0 | -3.395726      | 2.044507  | -1.893891      |
| 30    | 1           | 0 | 2.013070       | -4.200465 | -0.677778      |
| 31    | 1           | 0 | 0.345304       | -4.012383 | -0.033160      |
| 32    | 1           | 0 | 1.755833       | -3.923898 | 1.080806       |
| 33    | 1           | 0 | 1.211617       | 1.920247  | 2.502880       |
| 34    | 1           | 0 | 2.380882       | 3.937046  | 1.659348       |
| 35    | 1           | 0 | 2.591150       | 4.317515  | -0.796043      |
| 36    | 1           | 0 | 1.625645       | 2.663319  | -2.387571      |
| 37    | 1           | 0 | 0.481157       | 0.637901  | -1.535935      |

### B3LYP/6-31+G\*\* (gas phase)

Filename: b3BBts8cis

E(RB+HF-LYP) = -1185.28779729

Zero-point correction= 0.299718 (Hartree/Particle)  
 Thermal correction to Energy= 0.319780  
 Thermal correction to Enthalpy= 0.320724  
 Thermal correction to Gibbs Free Energy= 0.249412  
 Sum of electronic and zero-point Energies= -1184.988080  
 Sum of electronic and thermal Energies= -1184.968017  
 Sum of electronic and thermal Enthalpies= -1184.967073  
 Sum of electronic and thermal Free Energies= -1185.038386

| Total | E (Thermal) |  | CV             |  | S              |
|-------|-------------|--|----------------|--|----------------|
|       | KCal/Mol    |  | Cal/Mol-Kelvin |  | Cal/Mol-Kelvin |
|       | 200.665     |  | 73.269         |  | 150.090        |

C,0,-0.450326748,-2.3387607701,-2.3790126649  
 C,0,0.6831246099,-2.1624371287,-1.4082220262  
 C,0,0.7996369138,-2.7608299747,-0.1602977862  
 C,0,2.1151495656,-2.7956538116,0.5539020834  
 C,0,-0.3580401346,-3.3764172925,0.5631510709  
 O,0,0.0575093357,-0.5606241749,-0.4754925698  
 C,0,0.8021578579,0.66206284,-0.633042944  
 N,0,-0.4248667295,1.3254874949,-0.3571536857  
 S,0,-0.8880331425,1.7492709524,1.2115876141  
 C,0,-2.5988412994,2.1791819556,0.8526021149  
 O,0,-0.1778130324,2.9843792512,1.5984559987  
 O,0,-0.9067337109,0.6253582588,2.1714879478  
 H,0,1.6112461011,-1.7927470129,-1.8427924963  
 H,0,1.0360296901,0.8277692745,-1.6934218592  
 C,0,2.0781452674,0.8193551468,0.1675780424  
 H,0,-0.5106703152,-1.4757111716,-3.0471440329  
 H,0,-1.414282956,-2.4397149056,-1.8779761513  
 H,0,-0.2842354996,-3.2301160552,-2.9987693297  
 H,0,-0.6864666539,-2.68836451,1.3547553523  
 H,0,-0.0541811579,-4.3085820828,1.0537665427  
 H,0,-1.2148192309,-3.5807274158,-0.0799228774  
 H,0,2.0143512617,-2.4505305753,1.5889882691  
 H,0,2.8794721224,-2.1930683054,0.0597720296  
 H,0,2.4696246547,-3.835644778,0.6026992424  
 H,0,-3.0293114232,2.5213722081,1.795414584  
 H,0,-3.1113306002,1.2880791801,0.4898706561  
 H,0,-2.6098879768,2.9732272702,0.106320266  
 C,0,3.198109416,1.3329891442,-0.5013228922  
 C,0,4.4129639061,1.5130981877,0.1648267694  
 C,0,4.5198305191,1.1753861343,1.5153487846  
 C,0,3.4081959373,0.6588640246,2.1890142874  
 C,0,2.1953195906,0.4781154512,1.5234171653  
 H,0,3.1177372615,1.6022140863,-1.5520992488  
 H,0,5.2683021949,1.9174875843,-0.3687500092  
 H,0,5.4598522435,1.3167101072,2.0411243945  
 H,0,3.4826773575,0.4027683057,3.2421411919  
 H,0,1.3342098041,0.0922661072,2.0567341661

### B3LYP/6-31G\* (gas phase)

E(RB+HF-LYP) = -1185.23044279

|                                              |                             |
|----------------------------------------------|-----------------------------|
| Zero-point correction=                       | 0.301915 (Hartree/Particle) |
| Thermal correction to Energy=                | 0.321729                    |
| Thermal correction to Enthalpy=              | 0.322673                    |
| Thermal correction to Gibbs Free Energy=     | 0.252442                    |
| Sum of electronic and zero-point Energies=   | -1184.928528                |
| Sum of electronic and thermal Energies=      | -1184.908714                |
| Sum of electronic and thermal Enthalpies=    | -1184.907770                |
| Sum of electronic and thermal Free Energies= | -1184.978001                |

|       | E (Thermal) | CV             | S              |
|-------|-------------|----------------|----------------|
|       | KCAL/MOL    | CAL/MOL-KELVIN | CAL/MOL-KELVIN |
| TOTAL | 201.888     | 72.694         | 147.813        |

Standard orientation:

| Center Number | Atomic Number | Atomic Type | Coordinates (Angstroms) |          |           |
|---------------|---------------|-------------|-------------------------|----------|-----------|
|               |               |             | X                       | Y        | Z         |
| 1             | 6             | 0           | 0.903232                | 2.671054 | -0.777584 |
| 2             | 6             | 0           | 0.573598                | 2.740378 | 0.569523  |

|    |    |   |           |           |           |
|----|----|---|-----------|-----------|-----------|
| 3  | 8  | 0 | 0.980069  | 0.754493  | -0.548909 |
| 4  | 6  | 0 | 0.033361  | -0.115245 | -1.194086 |
| 5  | 7  | 0 | 1.050777  | -1.105212 | -1.123265 |
| 6  | 16 | 0 | 1.238847  | -2.089317 | 0.231425  |
| 7  | 8  | 0 | 0.274450  | -3.200761 | 0.158648  |
| 8  | 8  | 0 | 1.367575  | -1.358158 | 1.509226  |
| 9  | 6  | 0 | 2.268212  | 2.884549  | -1.368953 |
| 10 | 6  | 0 | 1.596245  | 2.646520  | 1.661595  |
| 11 | 6  | 0 | -0.854029 | 2.865731  | 1.002262  |
| 12 | 6  | 0 | 2.871330  | -2.733650 | -0.170151 |
| 13 | 1  | 0 | 0.075169  | 2.780895  | -1.477130 |
| 14 | 6  | 0 | -1.349381 | -0.235372 | -0.587031 |
| 15 | 1  | 0 | -0.078725 | 0.164980  | -2.250529 |
| 16 | 1  | 0 | 2.346077  | 2.364923  | -2.327899 |
| 17 | 1  | 0 | 3.061598  | 2.509024  | -0.719764 |
| 18 | 1  | 0 | 2.443287  | 3.954039  | -1.550637 |
| 19 | 1  | 0 | 1.279199  | 3.208591  | 2.546933  |
| 20 | 1  | 0 | 2.584862  | 2.998883  | 1.357736  |
| 21 | 1  | 0 | 1.694001  | 1.590785  | 1.955490  |
| 22 | 1  | 0 | -1.113383 | 2.102805  | 1.745419  |
| 23 | 1  | 0 | -1.556442 | 2.784602  | 0.169191  |
| 24 | 1  | 0 | -0.999886 | 3.842303  | 1.488074  |
| 25 | 1  | 0 | 3.127655  | -3.444886 | 0.618245  |
| 26 | 1  | 0 | 3.581487  | -1.905876 | -0.188585 |
| 27 | 1  | 0 | 2.828226  | -3.231141 | -1.139637 |
| 28 | 6  | 0 | -2.442725 | -0.117312 | -1.454920 |
| 29 | 6  | 0 | -3.751894 | -0.217514 | -0.981120 |
| 30 | 6  | 0 | -3.982415 | -0.434461 | 0.376836  |
| 31 | 6  | 0 | -2.898724 | -0.548676 | 1.251411  |
| 32 | 6  | 0 | -1.590958 | -0.447012 | 0.779175  |
| 33 | 1  | 0 | -2.267432 | 0.046168  | -2.516373 |
| 34 | 1  | 0 | -4.585940 | -0.128113 | -1.672090 |
| 35 | 1  | 0 | -4.998909 | -0.517468 | 0.752451  |
| 36 | 1  | 0 | -3.071529 | -0.724798 | 2.309889  |
| 37 | 1  | 0 | -0.758168 | -0.548705 | 1.465819  |

---

### *Epoxidation TS Isomer 9 + cis-Phenyl*

**B3LYP/6-31+G\*\* (PCM)**

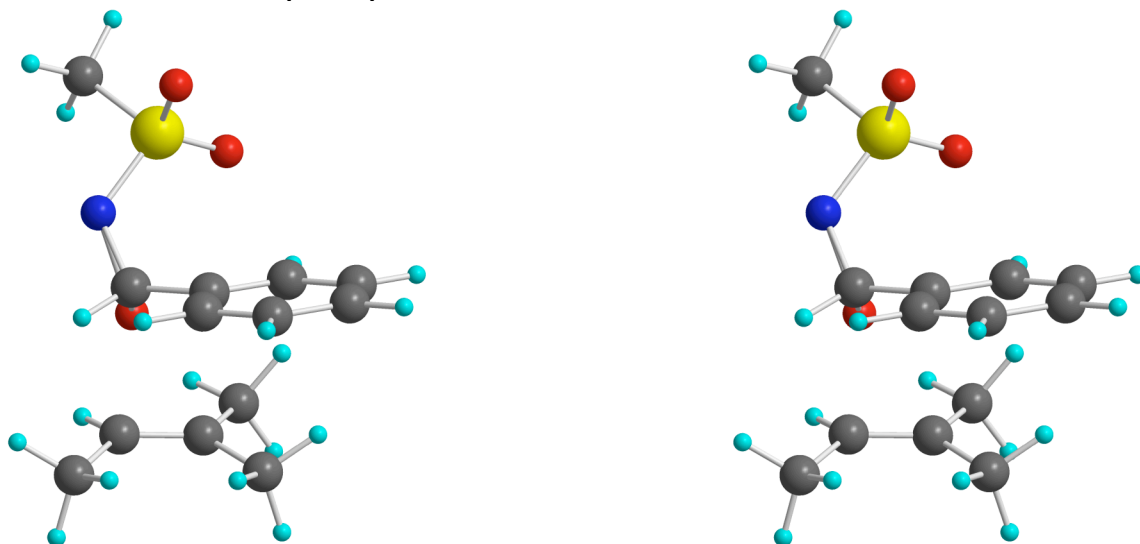

Filename: b3BBPCmts9cisfreq  
 E(RB+HF-LYP) = -1185.30311091

|                                              |                             |
|----------------------------------------------|-----------------------------|
| Zero-point correction=                       | 0.298994 (Hartree/Particle) |
| Thermal correction to Energy=                | 0.319040                    |
| Thermal correction to Enthalpy=              | 0.319984                    |
| Thermal correction to Gibbs Free Energy=     | 0.249121                    |
| Sum of electronic and zero-point Energies=   | -1185.004117                |
| Sum of electronic and thermal Energies=      | -1184.984071                |
| Sum of electronic and thermal Enthalpies=    | -1184.983127                |
| Sum of electronic and thermal Free Energies= | -1185.053990                |

|       | E (Thermal) | CV             | S              |
|-------|-------------|----------------|----------------|
|       | KCal/Mol    | Cal/Mol-Kelvin | Cal/Mol-Kelvin |
| Total | 200.201     | 73.409         | 149.144        |

C,0,-0.5346187483,2.2265457833,-1.3480076792  
 C,0,-0.2257237514,1.1687963941,-0.4806734182  
 C,0,-0.2488846677,1.3928021326,0.9033290173  
 C,0,-0.5646584816,2.6569303081,1.4048691986  
 C,0,-0.8628839802,3.7108184139,0.5338191681  
 C,0,-0.8477080997,3.4932577192,-0.8465720303  
 C,0,0.1141381771,-0.1671056301,-1.1043067948  
 N,0,1.4228082189,-0.75280491,-1.0824909448  
 S,0,2.5343025399,-0.4529824043,0.1474184109  
 O,0,3.2099444864,0.8351095875,-0.145915089  
 O,0,-0.2772698904,-1.3588837561,-0.4201107452  
 C,0,3.6903450221,-1.7802811795,-0.2192356416  
 O,0,2.0421370782,-0.6554868123,1.5278009798  
 C,0,-2.1691908847,-2.1131242084,-0.6180557786  
 C,0,-2.4382389606,-1.5661830977,0.6254809938  
 C,0,-3.2275923706,-0.3083968621,0.8228682503  
 C,0,-2.7053527306,-1.6413827625,-1.9370828636  
 C,0,-2.0048145807,-2.2751143617,1.8725966114  
 H,0,-1.7493082664,-3.1170154343,-0.6262940864  
 H,0,-0.2294024385,-0.1740997979,-2.1463654863  
 H,0,-2.0035984285,-1.8811231046,-2.741784486  
 H,0,-2.9164160901,-0.5698393773,-1.9638775605  
 H,0,-3.6413415957,-2.1704049475,-2.1624606721  
 H,0,-4.2451303759,-0.5794655715,1.1424567196  
 H,0,-3.3116376919,0.3012633874,-0.07735313  
 H,0,-2.7989538518,0.3053856979,1.6206293791  
 H,0,-1.3413666077,-1.6346798545,2.4661608213  
 H,0,-1.4814051985,-3.209205255,1.6575901693  
 H,0,-2.8778863186,-2.4951509218,2.5026210866  
 H,0,4.5155603946,-1.6708805181,0.4876303289  
 H,0,4.0380449184,-1.6691761333,-1.2465478908  
 H,0,3.1789542521,-2.7329550767,-0.0763268453  
 H,0,-0.0047161169,0.5835617438,1.5811302318  
 H,0,-0.5742030323,2.8203687387,2.4807966142  
 H,0,-1.106288487,4.6948020987,0.9297686458  
 H,0,-1.0804934066,4.3049899566,-1.532779835  
 H,0,-0.526298881,2.0596891588,-2.4246273292

### B3LYP/6-31+G\*\* (gas phase)

E(RB+HF-LYP) = -1185.28651191

|                                            |                             |
|--------------------------------------------|-----------------------------|
| Zero-point correction=                     | 0.299825 (Hartree/Particle) |
| Thermal correction to Energy=              | 0.319818                    |
| Thermal correction to Enthalpy=            | 0.320762                    |
| Thermal correction to Gibbs Free Energy=   | 0.249943                    |
| Sum of electronic and zero-point Energies= | -1184.986687                |
| Sum of electronic and thermal Energies=    | -1184.966694                |
| Sum of electronic and thermal Enthalpies=  | -1184.965750                |



Sum of electronic and thermal Free Energies= -1185.036569

|       | E (Thermal)<br>KCal/Mol | CV<br>Cal/Mol-Kelvin | S<br>Cal/Mol-Kelvin |
|-------|-------------------------|----------------------|---------------------|
| Total | 200.689                 | 73.308               | 149.052             |

C,0,-2.4642703525,-2.4549310935,0.250554391  
C,0,-1.5073576981,-2.079218178,-0.844500683  
C,0,-0.2106740144,-2.5588988344,-1.0032348406  
C,0,0.5564757393,-2.2490758019,-2.2516313927  
C,0,0.4835315961,-3.4153642132,0.0092856326  
O,0,-0.6247130326,-0.3986561802,-0.3926804438  
C,0,-0.6929168242,0.1796839423,0.934229966  
N,0,-0.4669828745,1.4368901471,0.3170507913  
S,0,1.0860046171,2.0349220145,0.0435807221  
C,0,0.643548471,3.3669283984,-1.0836014877  
O,0,1.9864529568,1.1171038719,-0.688731691  
O,0,1.5880238708,2.6428407407,1.2924233662  
H,0,-1.9695675178,-1.6458177856,-1.7267521625  
C,0,0.1838981613,-0.4256273617,2.0125339827  
H,0,-1.7303497972,0.1731669451,1.2900769646  
H,0,-3.200966851,-1.6605103845,0.4015673899  
H,0,-1.9695770109,-2.6552978602,1.2033270672  
H,0,-3.0204510374,-3.3572189337,-0.0363767509  
H,0,0.4421135389,-4.4622920775,-0.3276388322  
H,0,0.0394752472,-3.3646078011,1.0035788788  
H,0,1.5417902967,-3.1497837183,0.0885640853  
H,0,1.3937252247,-1.5804262285,-2.0128395955  
H,0,-0.0616830503,-1.7573637302,-3.0058288585  
H,0,0.9822679574,-3.1663110796,-2.6793971012  
H,0,1.5736548348,3.8884144036,-1.3165432699  
H,0,-0.0607079482,4.0290215761,-0.5803472885  
H,0,0.2042070691,2.9315193696,-1.9812075393  
C,0,1.536359822,-0.7527837739,1.8319797057  
C,0,2.2730132018,-1.2973414384,2.8845291676  
C,0,1.6756290057,-1.5270803815,4.1281291025  
C,0,0.3296581905,-1.2071761098,4.3159695497  
C,0,-0.4075894895,-0.6614971235,3.2619181209  
H,0,2.0137968411,-0.5606362132,0.8779930996  
H,0,3.3226603647,-1.5341666447,2.7348391666  
H,0,2.2567933963,-1.9469811535,4.9442000536  
H,0,-0.1451366678,-1.376342565,5.2781948196  
H,0,-1.4538152367,-0.4067237435,3.4155349138

### CCSDT Parent

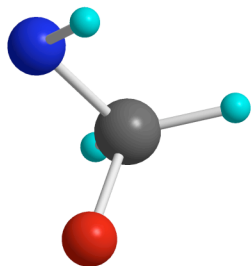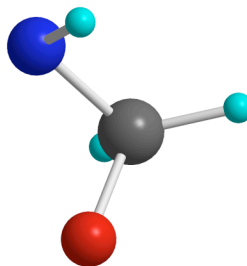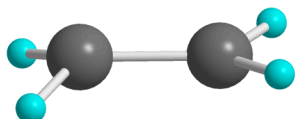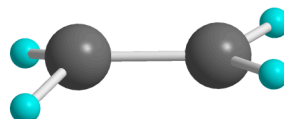

Bond Distances: C-O = 1.82 Å C-O = 2.52 Å N-O = 1.99 Å

SCF Done: E(RHF) = -246.751356758 A.U. after 9 cycles

|    |   |   |           |           |           |
|----|---|---|-----------|-----------|-----------|
| 1  | 1 | 0 | -1.630272 | -1.553035 | -0.232507 |
| 2  | 6 | 0 | -1.450640 | -0.619297 | 0.286415  |
| 3  | 6 | 0 | -1.994737 | 0.555707  | -0.225604 |
| 4  | 1 | 0 | -2.005497 | 1.469908  | 0.356772  |
| 5  | 1 | 0 | -2.297570 | 0.618561  | -1.263556 |
| 6  | 8 | 0 | 0.283399  | -0.520815 | -0.263311 |
| 7  | 6 | 0 | 1.007821  | 0.563366  | 0.290861  |
| 8  | 7 | 0 | 2.222367  | -0.121572 | -0.046401 |
| 9  | 1 | 0 | 2.348657  | 0.019501  | -1.057310 |
| 10 | 1 | 0 | -1.297877 | -0.707497 | 1.357271  |
| 11 | 1 | 0 | 0.875901  | 0.653081  | 1.373572  |
| 12 | 1 | 0 | 0.808244  | 1.518353  | -0.212975 |

### B3LYP Parent

Bond Distances: C-O = 1.69 Å C-O = 2.24 Å N-O = 2.01 Å

E(RB+HF-LYP) = -248.343323795

|                                              |                             |
|----------------------------------------------|-----------------------------|
| Zero-point correction=                       | 0.097363 (Hartree/Particle) |
| Thermal correction to Energy=                | 0.103481                    |
| Thermal correction to Enthalpy=              | 0.104425                    |
| Thermal correction to Gibbs Free Energy=     | 0.068115                    |
| Sum of electronic and zero-point Energies=   | -248.245961                 |
| Sum of electronic and thermal Energies=      | -248.239843                 |
| Sum of electronic and thermal Enthalpies=    | -248.238898                 |
| Sum of electronic and thermal Free Energies= | -248.275209                 |

|       | E (Thermal) | CV             | S              |
|-------|-------------|----------------|----------------|
|       | KCal/Mol    | Cal/Mol-Kelvin | Cal/Mol-Kelvin |
| Total | 64.935      | 20.578         | 76.421         |

H,0,-1.5323233145,-1.5785160178,-0.0797768357  
C,0,-1.3975259659,-0.5720606364,0.3042798963  
C,0,-2.0645989262,0.4867212715,-0.3151659724  
H,0,-2.1028516267,1.4690173105,0.1435182463  
H,0,-2.4542393236,0.3852359044,-1.3214515304  
O,0,0.0815835395,-0.1578235365,-0.4111383814  
C,0,1.1007393537,0.5491703857,0.3720134821  
N,0,2.076155941,-0.2829849212,-0.1706035374  
H,0,2.3299333044,0.0924388928,-1.090697857  
H,0,-1.193902828,-0.5231736867,1.3721647931  
H,0,0.9383816968,0.3905780606,1.4449200008  
H,0,1.0884441494,1.6176579732,0.1151646957

### mPW1K Parent

Bond Distances: C-O = 1.66 Å C-O = 2.17 Å N-O = 1.97 Å

E(RmPW+HF-PW91) = -248.231240077

|                                              |                             |
|----------------------------------------------|-----------------------------|
| Zero-point correction=                       | 0.100793 (Hartree/Particle) |
| Thermal correction to Energy=                | 0.106737                    |
| Thermal correction to Enthalpy=              | 0.107682                    |
| Thermal correction to Gibbs Free Energy=     | 0.071749                    |
| Sum of electronic and zero-point Energies=   | -248.130447                 |
| Sum of electronic and thermal Energies=      | -248.124503                 |
| Sum of electronic and thermal Enthalpies=    | -248.123559                 |
| Sum of electronic and thermal Free Energies= | -248.159491                 |

|       |             |                |                |
|-------|-------------|----------------|----------------|
|       | E (Thermal) | CV             | S              |
|       | KCal/Mol    | Cal/Mol-Kelvin | Cal/Mol-Kelvin |
| Total | 66.979      | 19.846         | 75.625         |

H,0,-1.5175308832,-1.5731082011,-0.0896436  
 C,0,-1.3729005167,-0.5776597628,0.3017962764  
 C,0,-2.0058386778,0.4893050354,-0.313256214  
 H,0,-2.0340433939,1.4615359577,0.1529870744  
 H,0,-2.3904042353,0.398435874,-1.3157770184  
 O,0,0.0667453925,-0.1593494206,-0.3996621045  
 C,0,1.063350681,0.5535022249,0.3683408654  
 N,0,2.0155620467,-0.2791112763,-0.1638939738  
 H,0,2.276845166,0.0815049945,-1.0757817611  
 H,0,-1.1747496749,-0.5394782956,1.3648898268  
 H,0,0.8956969194,0.409450488,1.4357785543  
 H,0,1.0470631762,1.6112333818,0.0974490746

## Table of B3LYP/6-31+G\*\* Energies

Table of Energies for Reactions of 2-methyl-2-butene with 2-(methylsulfonyl)oxaziridine from B3LYP/6-31+G\*\*

| Isomer  | Fig in Paper | Gas Phase Energy | PCM Energy  | Gas Phase Free Energy | PCM Free Energy |
|---------|--------------|------------------|-------------|-----------------------|-----------------|
| ts 1 ** | Not shown    | -954.00759       | -954.021744 | -954.051787           | -954.065809     |
| ts 2    | Not shown    | -954.005568      | -954.021264 | -954.048877           | -954.065078     |
| ts 3    | Not shown    | -954.00759       | -954.021744 | -954.051791           | -954.065795     |
| ts 4    | Not shown    | -954.006634      | -954.021471 | -954.049977           | -954.064988     |
| ts 5    | 4            | -954.008573      | -954.024275 | -954.051931           | -954.067828     |
| ts 6    | Not shown    | -954.007131      | -954.021958 | -954.050913           | -954.065875     |
| ts 7    | 6            | -954.007067      | -954.023098 | -954.049925           | -954.066459     |
| ts 8    | 3            | -954.009354      | -954.024651 | -954.052959           | -954.068434     |
| ts 9    | 5            | -954.007819      | -954.023864 | -954.050819           | -954.067155     |

\*\*ts 1 optimizes to ts 3 when the larger basis sets is used in the calculations.

Table of Energies for Reactions of 2-methyl-2-butene with *trans*-3-phenyl-2-methanesulfonyloxaziridine from B3LYP/6-31+G\*\*

| Isomer | Fig in Paper | Gas Phase Energy | PCM Energy   | Gas Phase Free Energy | PCM Free Energy |
|--------|--------------|------------------|--------------|-----------------------|-----------------|
| ts 3   | Not shown    | -1184.999913     | -1185.016004 | -1185.050934          | -1185.066834    |
| ts 5   | 8            | -1184.99981      | -1185.017734 | -1185.050189          | -1185.06781     |
| ts 7   | 10           | -1184.997833     | -1185.015821 | -1185.04725           | -1185.065636    |
| ts 8   | 7            | -1185.000354     | -1185.01765  | -1185.051346          | -1185.068021    |
| ts 9   | 9            | -1184.997782     | -1185.016184 | -1185.047187          | -1185.066078    |

Table of Energies for Reactions of 2-methyl-2-butene with *cis*-3-phenyl-2-methanesulfonyloxaziridine from B3LYP/6-31+G\*\*

| Isomer | Fig in Paper | Gas Phase Energy | PCM Energy   | Gas Phase Free Energy | PCM Free Energy | GP Barrier | PCM Barrier |
|--------|--------------|------------------|--------------|-----------------------|-----------------|------------|-------------|
| ts 3   | Not shown    | -1184.988082     | -1185.002455 | -1185.038389          | -1185.050991    |            |             |

|      |           |              |              |              |              |  |  |
|------|-----------|--------------|--------------|--------------|--------------|--|--|
| ts 5 | 12        | -1184.989347 | -1185.006128 | -1185.039381 | -1185.056614 |  |  |
| ts 7 | Not shown | -1184.984448 | -1185.002704 | -1185.034058 | -1185.051982 |  |  |
| ts 8 | 11        | -1184.98808  | -1185.004646 | -1185.038386 | -1185.055434 |  |  |
| ts 9 | Not shown | -1184.986687 | -1185.004117 | -1185.036569 | -1185.05399  |  |  |

## Table of Free Energy Barriers

### Free Energy Barriers\*

|                              | enthalpic barrier<br>(kcal/mol) | free energy barrier<br>(kcal/mol) | experimental free energy barrier<br>(kcal/mol)** |
|------------------------------|---------------------------------|-----------------------------------|--------------------------------------------------|
| B3LYP/6-31+G** (gas phase)   | 17.6                            | 29.1                              | 24.7                                             |
| B3LYP/6-31+G** (PCM)         | 15.3                            | 26.6                              | 22.2                                             |
| MPW1K/6-31+G** (gas phase)   | 23.4                            | 35.4                              | 31.0                                             |
| MPW1K/6-31+G** (PCM)         | 24.0                            | 35.4                              | 31.0                                             |
| bpw91/6-31G* (gas phase)     | 12.8                            | 24.1                              | 19.7                                             |
| mpwb95/6-31G* (gas phase)    | 20.5                            | 33.5                              | 29.1                                             |
| mpwb1k/6-31G* (gas phase)    | 25.1                            | 38.0                              | 33.6                                             |
| b3pw91/6-31G* (gas phase)    | 19.4                            | 31.0                              | 26.6                                             |
| rhf/6-31G* (gas phase)       | 48.0                            | 60.0                              | 55.6                                             |
| mpw3lyp/6-31G* (gas phase)   | 15.2                            | 27.0                              | 22.6                                             |
| tpsskcis/6-31G* (gas phase)  | 16.3                            | 28.2                              | 23.8                                             |
| pbepbe/6-31G* (gas phase)    | 62.8                            | 75.4                              | 71                                               |
| pbev5lyp/6-31G* (gas phase)  | 52.7                            | 65.4                              | 61.0                                             |
| tpssv5lyp/6-31G* (gas phase) | 57.6                            | 70.3                              | 65.9                                             |
| bb95/6-31G* (gas phase)      | 26.3                            | 39.1                              | 34.7                                             |
| bp86/6-31G* (gas phase)      | 17.6                            | 29.1                              | 24.7                                             |
| pbe1kcis/6-31G* (gas phase)  | 18.3                            | 30.2                              | 25.8                                             |
| mpwlp1m/6-31G* (gas phase)   | 9.3                             | 21.1                              | 16.7                                             |

\*All energies based upon structure 3.

\*\*Free Energies calculated using the experimental conditions as standard state.

|                                                 | Energy based upon structure (from paper) | enthalpic barrier (kcal/mol) | free energy barrier (kcal/mol) | experimental free energy barrier (kcal/mol)** |
|-------------------------------------------------|------------------------------------------|------------------------------|--------------------------------|-----------------------------------------------|
| B3LYP/6-31+G** <i>trans</i> -phenyl (gas phase) | 7                                        | 20.4                         | 32.2                           | 27.8                                          |
| B3LYP/6-31+G** <i>trans</i> -phenyl (PCM)       | 7                                        | 19.1                         | 31.2                           | 26.8                                          |
| B3LYP/6-31+G** <i>cis</i> -phenyl (gas phase)   | 12                                       | 21.1                         | 21.1                           | 27.3                                          |
| B3LYP/6-31+G** <i>cis</i> -phenyl (PCM)         | 12                                       | 19.9                         | 19.9                           | 28.9                                          |

\*\*Free Energies calculated using the experimental conditions as standard state.

## Table of KIEs and C-O Bond Distances

(All C-O Bond Distances are reported in angstroms)

Table of KIEs for the Gas Phase Reactions of 2-methyl-2-butene with 2-(methylsulfonyl)oxaziridine from B3LYP/6-31+G\*\*

| Isomer | fig # | monosubstituted olefin | KIE | disubstituted olefin | KIE |
|--------|-------|------------------------|-----|----------------------|-----|
|        |       | C-O                    |     | C-O                  |     |
|        |       |                        |     |                      |     |

|      |           |       |       |       |       |
|------|-----------|-------|-------|-------|-------|
| ts 2 | Not shown | 2.029 | 1.006 | 2.237 | 0.999 |
| ts 3 | Not shown | 2.078 | 1.015 | 2.206 | 1.009 |
| ts 4 | Not shown | 2.106 | 1.014 | 2.160 | 1.011 |
| ts 5 | 4         | 1.995 | 1.019 | 2.244 | 1.008 |
| ts 6 | Not shown | 2.053 | 1.015 | 2.243 | 1.007 |
| ts 7 | 6         | 1.978 | 1.018 | 2.238 | 1.008 |
| ts 8 | 3         | 2.031 | 1.016 | 2.194 | 1.008 |
| ts 9 | 5         | 2.030 | 1.015 | 2.160 | 1.009 |

\*All KIEs normalized to set the 4th carbon of 2-methyl-2-butene as the standard, similar to experiment

**Table of KIEs for Reactions of 2-methyl-2-butene with 2-(methylsulfonyl)oxaziridine from B3LYP/6-31+G\*\* with PCM solvent model**

| Isomer | fig #     | monosubstituted olefin |       | disubstituted olefin |       |
|--------|-----------|------------------------|-------|----------------------|-------|
|        |           | C-O                    | KIE   | C-O                  | KIE   |
| ts 2   | Not shown | 2.159                  | 1.011 | 2.340                | 1.007 |
| ts 3   | Not shown | 2.165                  | 1.011 | 2.340                | 1.006 |
| ts 4   | Not shown | 2.182                  | 1.011 | 2.319                | 1.008 |
| ts 5   | 4         | 2.150                  | 1.012 | 2.316                | 1.007 |
| ts 6   | Not shown | 2.174                  | 1.011 | 2.333                | 1.007 |
| ts 7   | 6         | 2.144                  | 1.012 | 2.309                | 1.008 |
| ts 8   | 3         | 2.150                  | 1.012 | 2.316                | 1.007 |
| ts 9   | 5         | 2.162                  | 1.012 | 2.298                | 1.008 |

\*All KIEs normalized to set the 4th carbon of 2-methyl-2-butene as the standard, similar to experiment

**Table of KIEs for the Reactions of 2-methyl-2-butene with 2-(methylsulfonyl)oxaziridine from B3LYP/6-31+G\*\* with Onsager solvent model**

| Isomer | fig #     | monosubstituted olefin |       | disubstituted olefin |       |
|--------|-----------|------------------------|-------|----------------------|-------|
|        |           | C-O                    | KIE   | C-O                  | KIE   |
| ts 2   | Not shown | 2.100                  | 1.013 | 2.300                | 1.008 |
| ts 3   | Not shown | 2.128                  | 1.013 | 2.251                | 1.008 |
| ts 4   | Not shown | 2.136                  | 1.012 | 2.240                | 1.009 |
| ts 5   | 4         | 2.132                  | 1.013 | 2.336                | 1.006 |
| ts 6   | Not shown | 2.112                  | 1.013 | 2.303                | 1.007 |
| ts 7   | 6         | 2.126                  | 1.013 | 2.329                | 1.007 |
| ts 8   | 3         | 2.130                  | 1.013 | 2.302                | 1.007 |
| ts 9   | 5         | 2.139                  | 1.012 | 2.297                | 1.007 |

\*All KIEs normalized to set the 4th carbon of 2-methyl-2-butene as the standard, similar to experiment

**Table of KIEs for Gas Phase Reactions of 2-methyl-2-butene with trans-3-phenyl-2-methanesulfonyloxaziridine from B3LYP/6-31+G\*\***

| Isomer | fig #     | monosubstituted olefin |       | disubstituted olefin |       |
|--------|-----------|------------------------|-------|----------------------|-------|
|        |           | C-O                    | KIE   | C-O                  | KIE   |
| ts 3   | Not shown | 2.055                  | 1.016 | 2.186                | 1.009 |
| ts 5   | 8         | 1.960                  | 1.022 | 2.295                | 1.007 |
| ts 7   | 10        | 1.928                  | 1.021 | 2.290                | 1.008 |
| ts 8   | 7         | 1.993                  | 1.018 | 2.183                | 1.009 |
| ts 9   | 9         | 2.090                  | 1.014 | 2.055                | 1.016 |

\*All KIEs normalized to set the 4th carbon of 2-methyl-2-butene as the standard, similar to experiment

**Table of KIEs for Gas Phase Reactions of 2-methyl-2-butene with cis-3-phenyl-2-methanesulfonyloxaziridine from B3LYP/6-31+G\*\***

| Isomer | fig #     | monosubstituted olefin |       | disubstituted olefin |       |
|--------|-----------|------------------------|-------|----------------------|-------|
|        |           | C-O                    | KIE   | C-O                  | KIE   |
| ts 3   | Not shown | 1.956                  | 1.024 | 2.343                | 1.006 |
| ts 5   | 8         | 1.983                  | 1.018 | 2.206                | 1.009 |
| ts 7   | 10        | 2.164                  | 1.012 | 1.976                | 1.021 |
| ts 8   | 7         | 1.956                  | 1.024 | 2.343                | 1.006 |
| ts 9   | 9         | 1.951                  | 1.022 | 2.283                | 1.008 |

\*All KIEs normalized to set the 4th carbon of 2-methyl-2-butene as the standard, similar to experiment

**Table of KIEs for Reactions of 2-methyl-2-butene with trans-3-phenyl-2-methanesulfonyloxaziridine from B3LYP/6-31+G\*\* with PCM solvent model]**

| Isomer | fig #     | monosubstituted olefin |       | disubstituted olefin |       |
|--------|-----------|------------------------|-------|----------------------|-------|
|        |           | C-O                    | KIE   | C-O                  | KIE   |
| ts 3   | Not shown | 2.126                  | 1.013 | 2.287                | 1.007 |
| ts 5   | 8         | 2.080                  | 1.016 | 2.339                | 1.007 |
| ts 7   | 10        | 2.049                  | 1.016 | 2.366                | 1.007 |
| ts 8   | 7         | 2.106                  | 1.014 | 2.269                | 1.008 |
| ts 9   | 9         | 2.141                  | 1.013 | 2.209                | 1.011 |

\*All KIEs normalized to set the 4th carbon of 2-methyl-2-butene as the standard, similar to experiment

**Table of KIEs for Reactions of 2-methyl-2-butene with cis-3-phenyl-2-methanesulfonyloxaziridine from B3LYP/6-31+G\*\* with PCM solvent model**

| Isomer | fig #     | monosubstituted olefin |       | disubstituted olefin |       |
|--------|-----------|------------------------|-------|----------------------|-------|
|        |           | C-O                    | KIE   | C-O                  | KIE   |
| ts 3   | Not shown | 2.093                  | 1.017 | 2.378                | 1.005 |
| ts 5   | 8         | 2.093                  | 1.014 | 2.289                | 1.007 |
| ts 7   | 10        | 2.239                  | 1.011 | 2.095                | 1.015 |
| ts 8   | 7         | 2.065                  | 1.019 | 2.378                | 1.006 |
| ts 9   | 9         | 2.046                  | 1.017 | 2.410                | 1.006 |

\*All KIEs normalized to set the 4th carbon of 2-methyl-2-butene as the standard, similar to experiment

| <b>GAS</b>            | C3    |        | C2    |        |
|-----------------------|-------|--------|-------|--------|
| <b>b3lyp/6-31+G**</b> | C-O   | KIE    | C-O   | KIE    |
| ts 1                  | 2.078 | 1.0145 | 2.206 | 1.0081 |
| ts 2                  | 2.029 | 1.0152 | 2.237 | 1.0082 |
| ts 3                  | 2.078 | 1.0145 | 2.206 | 1.0081 |
| ts 4                  | 2.106 | 1.0124 | 2.160 | 1.0099 |
| ts 5                  | 1.995 | 1.0184 | 2.244 | 1.0075 |
| ts 6                  | 2.053 | 1.0152 | 2.243 | 1.0072 |
| ts 7                  | 1.978 | 1.0180 | 2.238 | 1.0083 |
| ts 8                  | 2.031 | 1.0163 | 2.194 | 1.0081 |
| ts 9                  | 2.030 | 1.0151 | 2.160 | 1.0095 |

| <b>PCM</b>            | C3    |         | C2    |         |
|-----------------------|-------|---------|-------|---------|
| <b>b3lyp/6-31+G**</b> | C-O   | KIE     | C-O   | KIE     |
| ts 1                  | 2.165 | 1.01091 | 2.338 | 1.00570 |
| ts 2                  | 2.159 | 1.01053 | 2.340 | 1.00636 |
| ts 3                  | 2.165 | 1.01111 | 2.340 | 1.00571 |
| ts 4                  | 2.182 | 1.00997 | 2.319 | 1.00663 |
| ts 5                  | 2.150 | 1.01158 | 2.316 | 1.00605 |
| ts 6                  | 2.174 | 1.01044 | 2.333 | 1.00616 |
| ts 7                  | 2.144 | 1.01111 | 2.309 | 1.00710 |
| ts 8                  | 2.150 | 1.01169 | 2.316 | 1.00606 |
| ts 9                  | 2.162 | 1.01067 | 2.298 | 1.00669 |

| <b>ONSAGER</b>        | C3    |       | C2    |       |
|-----------------------|-------|-------|-------|-------|
| <b>b3lyp/6-31+G**</b> | C-O   | KIE   | C-O   | KIE   |
| ts 1                  | 2.123 | 1.013 | 2.247 | 1.008 |
| ts 2                  | 2.100 | 1.012 | 2.300 | 1.007 |
| ts 3                  | 2.128 | 1.012 | 2.251 | 1.007 |
| ts 4                  | 2.136 | 1.011 | 2.240 | 1.008 |
| ts 5                  | 2.132 | 1.013 | 2.336 | 1.006 |
| ts 6                  | 2.112 | 1.013 | 2.303 | 1.006 |
| ts 7                  | 2.126 | 1.012 | 2.329 | 1.007 |
| ts 8                  | 2.130 | 1.012 | 2.302 | 1.006 |
| ts 9                  | 2.139 | 1.011 | 2.297 | 1.007 |

| <b>GAS</b>            | C3    |       | C2    |       |
|-----------------------|-------|-------|-------|-------|
| <b>mpw1k/6-31+G**</b> | C-O   | KIE   | C-O   | KIE   |
| ts 1                  | 2.036 | 1.014 | 2.132 | 1.009 |
| ts 2                  | 1.990 | 1.014 | 2.160 | 1.009 |
| ts 3                  | 2.036 | 1.014 | 2.132 | 1.009 |
| ts 4                  | 2.058 | 1.012 | 2.106 | 1.010 |
| ts 5                  | 1.969 | 1.016 | 2.150 | 1.008 |
| ts 6                  | 2.008 | 1.014 | 2.152 | 1.008 |
| ts 7                  | 1.958 | 1.016 | 2.160 | 1.009 |
| ts 8                  | 2.004 | 1.015 | 2.121 | 1.009 |
| ts 9                  | 2.011 | 1.014 | 2.105 | 1.010 |

| <b>PCM</b> | C3 |  | C2 |  |
|------------|----|--|----|--|
|------------|----|--|----|--|

| <b>mpw1k/6-31+G**</b> | C-O   | KIE   | C-O   | KIE   |
|-----------------------|-------|-------|-------|-------|
| ts 1                  | 2.088 | 1.012 | 2.211 | 1.007 |
| ts 2                  | 2.076 | 1.011 | 2.228 | 1.007 |
| ts 3                  | 2.087 | 1.012 | 2.212 | 1.007 |
| ts 4                  | 2.096 | 1.011 | 2.210 | 1.008 |
| ts 5                  | 2.071 | 1.012 | 2.213 | 1.007 |
| ts 6                  | 2.082 | 1.012 | 2.222 | 1.007 |
| ts 7                  | 2.054 | 1.012 | 2.237 | 1.007 |
| ts 8                  | 2.077 | 1.012 | 2.206 | 1.007 |
| ts 9                  | 2.085 | 1.011 | 2.201 | 1.008 |

| <b>ONSAGER</b>        | C3    |       | C2    |       |
|-----------------------|-------|-------|-------|-------|
| <b>mpw1k/6-31+G**</b> | C-O   | KIE   | C-O   | KIE   |
| ts 1                  | 2.061 | 1.013 | 2.157 | 1.009 |
| ts 2                  | 2.026 | 1.013 | 2.205 | 1.008 |
| ts 3                  | 2.063 | 1.013 | 2.159 | 1.009 |
| ts 4                  | 2.073 | 1.012 | 2.155 | 1.009 |
| ts 5                  | 2.036 | 1.014 | 2.213 | 1.007 |
| ts 6                  | 2.038 | 1.013 | 2.201 | 1.008 |
| ts 7                  | 2.031 | 1.014 | 2.234 | 1.008 |
| ts 8                  | 2.063 | 1.013 | 2.196 | 1.007 |
| ts 9                  | 2.078 | 1.013 | 2.200 | 1.007 |

| <b>Gas</b>          | C3    |       | C2    |       |
|---------------------|-------|-------|-------|-------|
| <b>mpw1k/6-31G*</b> | C-O   | KIE   | C-O   | KIE   |
| ts 1                | 2.032 | 1.014 | 2.135 | 1.009 |
| ts 2                | 1.957 | 1.016 | 2.160 | 1.009 |
| ts 3                | 2.032 | 1.014 | 2.135 | 1.009 |
| ts 4                | 2.051 | 1.013 | 2.112 | 1.010 |
| ts 5                | 1.967 | 1.016 | 2.154 | 1.008 |
| ts 6                | 2.006 | 1.014 | 2.156 | 1.008 |
| ts 7                | 1.957 | 1.016 | 2.160 | 1.009 |
| ts 8                | 2.000 | 1.015 | 2.125 | 1.009 |
| ts 9                | 2.006 | 1.014 | 2.110 | 1.010 |

| <b>GAS PHASE TRANS</b> | C3  |     | C2  |     |
|------------------------|-----|-----|-----|-----|
| <b>b3lyp/6-31+G**</b>  | C-O | KIE | C-O | KIE |



|      |       |        |       |        |
|------|-------|--------|-------|--------|
| ts 3 | 2.055 | 1.0154 | 2.186 | 1.0086 |
| ts 5 | 1.960 | 1.0216 | 2.295 | 1.0068 |
| ts 7 | 1.928 | 1.0211 | 2.290 | 1.0078 |
| ts 8 | 1.993 | 1.0176 | 2.183 | 1.0085 |
| ts 9 | 2.090 | 1.0120 | 2.055 | 1.0143 |

|                       |       |        |       |        |
|-----------------------|-------|--------|-------|--------|
| <b>GAS PHASE CIS</b>  | C3    |        | C2    |        |
| <b>b3lyp/6-31+G**</b> | C-O   | KIE    | C-O   | KIE    |
| ts 3                  | 1.956 | 1.0233 | 2.343 | 1.0059 |
| ts 5                  | 1.983 | 1.0178 | 2.206 | 1.0088 |
| ts 7                  | 2.164 | 1.0094 | 1.976 | 1.0192 |
| ts 8                  | 1.956 | 1.0233 | 2.343 | 1.0059 |
| ts 9                  | 1.951 | 1.0214 | 2.283 | 1.0073 |

|                       |       |        |       |        |
|-----------------------|-------|--------|-------|--------|
| <b>PCM TRANS</b>      | C3    |        | C2    |        |
| <b>b3lyp/6-31+G**</b> | C-O   | KIE    | C-O   | KIE    |
| ts 3                  | 2.126 | 1.0123 | 2.287 | 1.0068 |
| ts 5                  | 2.080 | 1.0158 | 2.339 | 1.0060 |
| ts 7                  | 2.049 | 1.0159 | 2.366 | 1.0066 |
| ts 8                  | 2.106 | 1.0131 | 2.269 | 1.0070 |
| ts 9                  | 2.141 | 1.0115 | 2.209 | 1.0093 |

|                       |       |         |       |        |
|-----------------------|-------|---------|-------|--------|
| <b>PCM CIS</b>        | C3    |         | C2    |        |
| <b>b3lyp/6-31+G**</b> | C-O   | KIE     | C-O   | KIE    |
| ts 3                  | 2.093 | 1.01648 | 2.378 | 1.0049 |
| ts 5                  | 2.093 | 1.01340 | 2.289 | 1.0071 |
| ts 7                  | 2.239 | 1.00884 | 2.095 | 1.0136 |
| ts 8                  | 2.065 | 1.01817 | 2.378 | 1.0051 |
| ts 9                  | 2.046 | 1.01666 | 2.410 | 1.0060 |

|                        |       |       |       |       |
|------------------------|-------|-------|-------|-------|
| <b>PCM Trans</b>       | C3    |       | C2    |       |
| <b>b3lyp/6-311+G**</b> | C-O   | KIE   | C-O   | KIE   |
| <b>TS 8</b>            | 2.114 | 1.013 | 2.274 | 1.007 |

|                     |       |       |       |       |
|---------------------|-------|-------|-------|-------|
| <b>gas phase</b>    |       | C3    |       | C2    |
| <b>b3lyp/6-31G*</b> | KIE   | C-O   | KIE   | C-O   |
| ts 1                | 1.016 | 2.053 | 1.009 | 2.176 |
| ts 2                | 1.019 | 1.964 | 1.009 | 2.236 |
| ts 3                | 1.018 | 2.029 | 1.008 | 2.190 |

|      |       |       |       |       |
|------|-------|-------|-------|-------|
| ts 4 | 1.014 | 2.065 | 1.012 | 2.112 |
| ts 5 | 1.020 | 1.971 | 1.008 | 2.304 |
| ts 6 | 1.019 | 1.981 | 1.008 | 2.292 |
| ts 7 | 1.021 | 1.936 | 1.009 | 2.231 |
| ts 8 | 1.018 | 2.006 | 1.010 | 2.162 |
| ts 9 | 1.016 | 2.008 | 1.011 | 2.124 |

|                     |       |       |       |       |
|---------------------|-------|-------|-------|-------|
| <b>Onsager</b>      |       | C3    |       | C2    |
| <b>b3lyp/6-31G*</b> | KIE   | C-O   | KIE   | C-O   |
| ts 1                | 1.014 | 2.115 | 1.009 | 2.184 |
| ts 5                | 1.016 | 2.059 | 1.008 | 2.272 |
| ts 7                | 1.016 | 2.045 | 1.008 | 2.305 |
| ts 8                | 1.014 | 2.102 | 1.008 | 2.235 |
| ts 9                | 1.014 | 2.090 | 1.009 | 2.207 |

|                               |       |       |       |       |
|-------------------------------|-------|-------|-------|-------|
| <b>TRANS-phenyl gas phase</b> |       | C3    |       | C2    |
| <b>b3lyp/6-31G*</b>           | KIE   | C-O   | KIE   | C-O   |
| ts 1                          | 1.017 | 2.029 | 1.010 | 2.167 |
| ts 5                          | 1.024 | 1.920 | 1.008 | 2.309 |
| ts 8                          | 1.018 | 1.967 | 1.010 | 2.154 |
| ts 9                          | 1.013 | 2.078 | 1.016 | 2.019 |

|                             |       |       |       |       |
|-----------------------------|-------|-------|-------|-------|
| <b>TRANS-phenyl Onsager</b> |       | C3    |       | C2    |
| <b>b3lyp/6-31G*</b>         | KIE   | C-O   | KIE   | C-O   |
| ts 1                        | 1.015 | 2.061 | 1.010 | 2.164 |
| ts 5                        | 1.022 | 1.967 | 1.007 | 2.345 |
| ts 8                        | 1.015 | 2.057 | 1.009 | 2.193 |
| ts 9                        | 1.012 | 2.114 | 1.014 | 2.098 |

|                             |       |       |       |       |
|-----------------------------|-------|-------|-------|-------|
| <b>CIS-phenyl gas phase</b> |       | C3    |       | C2    |
| <b>b3lyp/6-31G*</b>         | KIE   | C-O   | KIE   | C-O   |
| ts 5                        | 1.019 | 1.961 | 1.010 | 2.190 |
| ts 8                        | 1.025 | 1.932 | 1.007 | 2.315 |

|                        |       |       |       |       |
|------------------------|-------|-------|-------|-------|
| <b>gas phase</b>       |       | C3    |       | C2    |
| <b>b3lyp/6-311+G**</b> | KIE   | C-O   | KIE   | C-O   |
| ts 8                   | 1.016 | 2.043 | 1.008 | 2.189 |

|                   |       |       |       |       |
|-------------------|-------|-------|-------|-------|
| <b>gas phase</b>  |       | C3    |       | C2    |
| <b>rhf/6-31G*</b> | KIE   | C-O   | KIE   | C-O   |
| is 5              | 1.016 | 1.990 | 1.011 | 2.128 |

|                    |       |       |       |       |
|--------------------|-------|-------|-------|-------|
| <b>gas phase</b>   |       | C3    |       | C2    |
| <b>BP86/6-31G*</b> | KIE   | C-O   | KIE   | C-O   |
| ts 5               | 1.020 | 2.024 | 1.007 | 2.325 |
| ts 7               | 1.020 | 1.992 | 1.008 | 2.282 |
| ts 8               | 1.016 | 2.073 | 1.009 | 2.193 |
| ts 9               | 1.015 | 2.059 | 1.011 | 2.151 |

|                     |       |       |       |       |
|---------------------|-------|-------|-------|-------|
| <b>Onsager</b>      |       | C3    |       | C2    |
| <b>MPW1K/6-31G*</b> | KIE   | C-O   | KIE   | C-O   |
| ts 2                | 1.013 | 2.042 | 1.008 | 2.236 |
| ts 3                | 1.013 | 2.056 | 1.009 | 2.16  |
| ts 4                | 1.012 | 2.064 | 1.009 | 2.154 |
| ts 5                | 1.014 | 2.043 | 1.007 | 2.222 |
| ts 6                | 1.014 | 2.037 | 1.008 | 2.205 |
| ts 7                | 1.013 | 2.047 | 1.008 | 2.24  |
| ts 8                | 1.012 | 2.076 | 1.007 | 2.216 |
| ts 9                | 1.012 | 2.069 | 1.008 | 2.194 |

|                                |       |       |       |       |
|--------------------------------|-------|-------|-------|-------|
| <b>gas phase</b>               |       | C3    |       | C2    |
| <b>ts 8 6-31G*</b>             | KIE   | C-O   | KIE   | C-O   |
| bpw91/6-31G* (gas phase)       | 1.019 | 2.021 | 1.008 | 2.232 |
| mpwb95/6-31G* (gas phase)      | 1.016 | 1.992 | 1.011 | 2.096 |
| mpwb1k/6-31G* (gas phase)      | 1.018 | 1.982 | 1.013 | 2.085 |
| b3pw91/6-31G* (gas phase)      | 1.017 | 1.998 | 1.009 | 2.162 |
| rhf/6-31G* (gas phase)         | 1.018 | 2.011 | 1.011 | 2.119 |
| mpw3lyp/6-31G* (gas phase)     | 1.017 | 2.011 | 1.010 | 2.157 |
| tpsskcis/6-31G* (gas phase)    | 1.017 | 1.995 | 1.010 | 2.141 |
| pbepbe/6-31G* (gas phase) †    | 1.016 | 1.757 | 1.013 | 1.819 |
| pbev5lyp/6-31G* (gas phase) †  | 1.015 | 1.836 | 1.012 | 1.902 |
| tpssv5lyp/6-31G* (gas phase) † | 1.015 | 1.788 | 1.013 | 1.827 |
| bb95/6-31G* (gas phase)        | 1.017 | 1.983 | 1.012 | 2.086 |
| pbe1kcis/6-31G* (gas phase)    | 1.018 | 1.991 | 1.009 | 2.154 |

† Wigner tunneling correction used in these cases.

## Plot of C-O Bond Distance versus KIEs for the Shi Epoxidation

Energies and geometries of all fully optimized transition structures can be found in the supporting information of Singleton, D. A.; Wang, Z. J. Am. Chem. Soc. 2005, 127, 6679-6685.

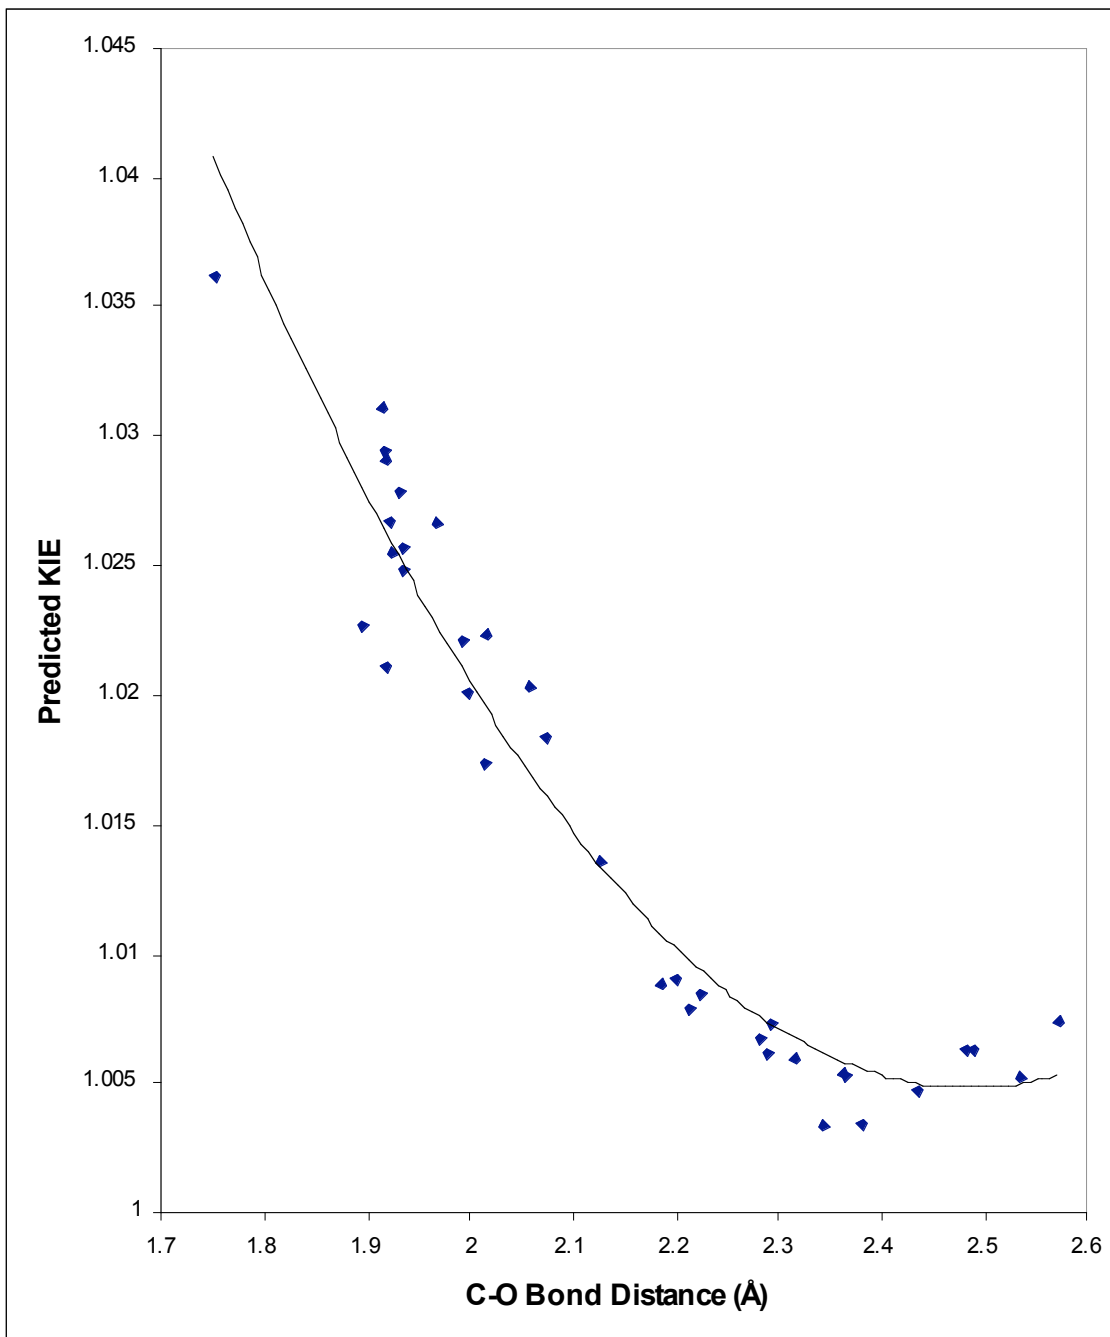

Fig 1. Plot of KIEs versus C-O Bond Distances for the epoxidation of  $\alpha$ -methyl styrene with the Shi catalyst.

## Table of KIEs and C-O Bond Distances for the Shi Epoxidation

|       | Bond Distances |       | KIEs  |       |
|-------|----------------|-------|-------|-------|
|       | beta           | alpha | beta  | alpha |
| ts a  | 1.991          | 2.315 | 1.022 | 1.006 |
| ts b  | 1.996          | 2.184 | 1.020 | 1.009 |
| ts c  | 2.125          | 2.013 | 1.014 | 1.017 |
| ts d  | 1.915          | 2.488 | 1.029 | 1.006 |
| ts e  | 1.914          | 2.380 | 1.031 | 1.004 |
| ts g  | 1.750          | 2.433 | 1.036 | 1.005 |
| ts h  | 1.929          | 2.342 | 1.028 | 1.003 |
| ts aa | 1.934          | 2.291 | 1.025 | 1.007 |
| ts ab | 1.917          | 2.198 | 1.021 | 1.009 |
| ts ad | 1.934          | 2.288 | 1.026 | 1.006 |
| ts bd | 1.916          | 2.481 | 1.029 | 1.006 |
| ts ca | 1.923          | 2.571 | 1.026 | 1.007 |
| ts cb | 1.894          | 2.222 | 1.023 | 1.009 |
| ts cd | 1.920          | 2.281 | 1.027 | 1.007 |
| ts da | 2.056          | 2.361 | 1.020 | 1.005 |
| ts dd | 1.965          | 2.534 | 1.027 | 1.005 |
| ts ea | 2.015          | 2.364 | 1.022 | 1.005 |
| ts eb | 2.072          | 2.211 | 1.018 | 1.008 |

## Energies and Geometries of Non-Stationary Point Structures

All geometries are based upon structure **3** in the paper (ts 8). Structures were optimized using B3LYP/6-31G\* in the gas-phase with the olefinic C-O bond distances fixed at the bond lengths listed below.

### Grid Structure C3 fixed at 1.9 / C2 fixed at 1.9

E(RB+HF-LYP) = -954.190519874

|                                              |                             |
|----------------------------------------------|-----------------------------|
| Zero-point correction=                       | 0.220903 (Hartree/Particle) |
| Thermal correction to Energy=                | 0.235133                    |
| Thermal correction to Enthalpy=              | 0.236077                    |
| Thermal correction to Gibbs Free Energy=     | 0.180063                    |
| Sum of electronic and zero-point Energies=   | -953.969617                 |
| Sum of electronic and thermal Energies=      | -953.955387                 |
| Sum of electronic and thermal Enthalpies=    | -953.954443                 |
| Sum of electronic and thermal Free Energies= | -954.010457                 |

|       | E (Thermal)<br>KCal/Mol | CV<br>Cal/Mol-Kelvin | S<br>Cal/Mol-Kelvin |
|-------|-------------------------|----------------------|---------------------|
| Total | 147.548                 | 51.832               | 117.891             |

C,0,2.7771875976,-0.4878137195,-0.3681855454  
C,0,2.0813711073,0.7309296921,-0.0702642247  
O,0,0.9381958166,-0.7847727775,0.0058768613  
C,0,-0.0926246561,-1.0904508337,-1.079518262  
N,0,-1.2060442794,-1.3141978694,-0.2975611283  
S,0,-2.1157981568,0.042081858,-0.0124260565  
O,0,-3.2421566847,0.1283987291,-0.9620336969  
O,0,-1.2972062025,1.2760129043,0.1538942624  
C,0,3.5808853358,-1.3175938529,0.5754695129

C,0,1.971383726,1.3008384943,1.3104143302  
 C,0,1.6475991486,1.6385005553,-1.1814497283  
 C,0,-2.7979170367,-0.3692971169,1.6012682975  
 H,0,2.8915761856,-0.7175308572,-1.4257123922  
 H,0,0.2543411464,-2.0073551053,-1.5660124749  
 H,0,-0.0858073856,-0.2483381656,-1.7816520615  
 H,0,3.4713630373,-2.3785005868,0.3308821689  
 H,0,3.292272089,-1.1688594925,1.6170172107  
 H,0,4.6466579698,-1.0653898666,0.47245934  
 H,0,2.6554838834,2.1545315515,1.4116983549  
 H,0,2.199086071,0.5749923983,2.0917803226  
 H,0,0.9474520939,1.6629719168,1.4479434047  
 H,0,0.5970271722,1.9130917481,-1.0342562632  
 H,0,1.7794627605,1.1905281006,-2.1699897505  
 H,0,2.2462743135,2.5585416546,-1.1392883708  
 H,0,-3.4856981172,0.433710107,1.8752338656  
 H,0,-1.9829740017,-0.4454835913,2.322585322  
 H,0,-3.3294127434,-1.31860577,1.5207495405

### Grid Structure C3 fixed at 1.9 / C2 fixed at 2.0

E(RB+HF-LYP) = -954.187662476

|                                              |                             |
|----------------------------------------------|-----------------------------|
| Zero-point correction=                       | 0.220898 (Hartree/Particle) |
| Thermal correction to Energy=                | 0.235179                    |
| Thermal correction to Enthalpy=              | 0.236124                    |
| Thermal correction to Gibbs Free Energy=     | 0.179699                    |
| Sum of electronic and zero-point Energies=   | -953.966765                 |
| Sum of electronic and thermal Energies=      | -953.952483                 |
| Sum of electronic and thermal Enthalpies=    | -953.951539                 |
| Sum of electronic and thermal Free Energies= | -954.007963                 |

|       | E (Thermal) | CV             | S              |
|-------|-------------|----------------|----------------|
|       | KCal/Mol    | Cal/Mol-Kelvin | Cal/Mol-Kelvin |
| Total | 147.577     | 51.725         | 118.755        |

C,0,2.7020487657,-0.4876000837,-0.3354808502  
 C,0,2.1178708757,0.7789011141,-0.0653867869  
 O,0,0.8491643725,-0.7665419424,-0.0208142213  
 C,0,-0.0679937166,-1.054065316,-1.1514582316  
 N,0,-1.1960841871,-1.3498615494,-0.391364743  
 S,0,-2.1408530195,-0.0217838281,-0.0539429106  
 O,0,-3.3603034596,-0.0507131337,-0.882243849  
 O,0,-1.3755734305,1.2541388728,-0.0294201092  
 C,0,3.4317208222,-1.366351402,0.6285334092  
 C,0,1.9711612135,1.3453716072,1.3114339042  
 C,0,1.7089448122,1.684489812,-1.1845666021  
 C,0,-2.6307093623,-0.3882798075,1.63926167  
 H,0,2.8363582443,-0.7293623597,-1.3883266884  
 H,0,0.3014902796,-1.9403717158,-1.6788885079  
 H,0,-0.0938131682,-0.1854915352,-1.8206469588  
 H,0,3.2593243888,-2.4174874796,0.3787919257  
 H,0,3.1234685806,-1.2037594706,1.6625920307  
 H,0,4.5133425747,-1.1826764493,0.5570663591  
 H,0,2.6535038746,2.197879065,1.4346263073  
 H,0,2.1733536408,0.620239628,2.1002903452  
 H,0,0.9465851027,1.7172416733,1.4230510334  
 H,0,0.6448041683,1.9296269165,-1.0761393047  
 H,0,1.8869513048,1.2470779423,-2.1704782829  
 H,0,2.2734324285,2.6242386273,-1.1149060115  
 H,0,-3.331605624,0.3898679704,1.9498333036

H,0,-1.7421354805,-0.3868098453,2.2722192932  
H,0,-3.1124738106,-1.3669772057,1.6552873157

## Grid Structure C3 fixed at 1.9 / C2 fixed at 2.1

E(RB+HF-LYP) = -954.185979720

|                                              |                             |
|----------------------------------------------|-----------------------------|
| Zero-point correction=                       | 0.221081 (Hartree/Particle) |
| Thermal correction to Energy=                | 0.236248                    |
| Thermal correction to Enthalpy=              | 0.237192                    |
| Thermal correction to Gibbs Free Energy=     | 0.177703                    |
| Sum of electronic and zero-point Energies=   | -953.964899                 |
| Sum of electronic and thermal Energies=      | -953.949732                 |
| Sum of electronic and thermal Enthalpies=    | -953.948788                 |
| Sum of electronic and thermal Free Energies= | -954.008276                 |

|       | E (Thermal) | CV             | S              |
|-------|-------------|----------------|----------------|
|       | KCal/Mol    | Cal/Mol-Kelvin | Cal/Mol-Kelvin |
| Total | 148.248     | 53.581         | 125.204        |

C,0,2.6419876863,-0.4825936302,-0.3131661462  
C,0,2.1613733792,0.8190702483,-0.0623737891  
O,0,0.7825303027,-0.7647303625,-0.0433095956  
C,0,-0.0593572863,-1.0346509174,-1.2011478587  
N,0,-1.1859118249,-1.3785829942,-0.4410068348  
S,0,-2.1546108242,-0.0677156641,-0.0664444558  
O,0,-3.4112768075,-0.1681658611,-0.8294023446  
O,0,-1.4323092478,1.2295196,-0.1108688986  
C,0,3.3126972436,-1.3968359251,0.6651802238  
C,0,2.0010431494,1.3923151465,1.3090254651  
C,0,1.7671371725,1.7211250767,-1.1886564094  
C,0,-2.5367790235,-0.4178034173,1.6576686311  
H,0,2.7857525128,-0.7386598764,-1.3617477232  
H,0,0.3237875288,-1.899653711,-1.7551244105  
H,0,-0.1146680124,-0.1501383907,-1.8474205343  
H,0,3.0993357089,-2.4378071207,0.4057057672  
H,0,2.982187726,-1.228110627,1.6916048199  
H,0,4.4024263095,-1.2603776001,0.6254864714  
H,0,2.6484825247,2.2727203589,1.422784279  
H,0,2.2313368493,0.6854923919,2.1067388621  
H,0,0.964018627,1.7315136721,1.4217446785  
H,0,0.6971657052,1.9544721916,-1.1010307876  
H,0,1.963705566,1.2832285442,-2.1708614629  
H,0,2.3143661944,2.6704264401,-1.1137005448  
H,0,-3.2456315036,0.3424559517,1.9936608646  
H,0,-1.6140673223,-0.3739400073,2.2380178816  
H,0,-2.9827421434,-1.4116334119,1.7175666908

## Grid Structure C3 fixed at 1.9 / C2 fixed at 2.2

E(RB+HF-LYP) = -954.184855473

|                                              |                             |
|----------------------------------------------|-----------------------------|
| Zero-point correction=                       | 0.221235 (Hartree/Particle) |
| Thermal correction to Energy=                | 0.236347                    |
| Thermal correction to Enthalpy=              | 0.237292                    |
| Thermal correction to Gibbs Free Energy=     | 0.178540                    |
| Sum of electronic and zero-point Energies=   | -953.963621                 |
| Sum of electronic and thermal Energies=      | -953.948508                 |
| Sum of electronic and thermal Enthalpies=    | -953.947564                 |
| Sum of electronic and thermal Free Energies= | -954.006316                 |

|  | E (Thermal) | CV             | S              |
|--|-------------|----------------|----------------|
|  | KCal/Mol    | Cal/Mol-Kelvin | Cal/Mol-Kelvin |

Total 148.310 53.491 123.653

C,0,2.5883202983,-0.4751553324,-0.2946559952  
 C,0,2.2051216791,0.8539564483,-0.0612217425  
 O,0,0.7267401473,-0.7752718527,-0.0613031918  
 C,0,-0.0614417797,-1.0225395483,-1.2394499349  
 N,0,-1.1818532445,-1.4032789117,-0.4740689994  
 S,0,-2.1688012105,-0.1052547609,-0.0683956371  
 O,0,-3.441124353,-0.2528438995,-0.7956767118  
 O,0,-1.4789017932,1.2050438245,-0.145619955  
 C,0,3.2137338278,-1.4128485041,0.6957532368  
 C,0,2.0506271138,1.4399437878,1.3049576098  
 C,0,1.8246731852,1.7520455082,-1.1952579801  
 C,0,-2.4854353877,-0.4573090734,1.668131365  
 H,0,2.7340288851,-0.7472126728,-1.3392787487  
 H,0,0.3307295589,-1.8696985446,-1.8152609088  
 H,0,-0.1401169463,-0.1246254696,-1.86442335  
 H,0,2.9724233024,-2.445706324,0.4294735619  
 H,0,2.8643361899,-1.238160081,1.7152242163  
 H,0,4.3074007297,-1.3099051253,0.6820606284  
 H,0,2.6557389237,2.3520695258,1.3954548645  
 H,0,2.327196895,0.7566094219,2.1085432999  
 H,0,1.0011555156,1.7357136344,1.436141277  
 H,0,0.7542147671,1.9911309326,-1.1183618262  
 H,0,2.0219219224,1.3046454033,-2.1731876178  
 H,0,2.3721403755,2.7015462352,-1.1273106839  
 H,0,-3.2001815328,0.2879955658,2.0246009829  
 H,0,-1.5447020364,-0.3890342159,2.2161508409  
 H,0,-2.9059648424,-1.4609158667,1.745904239

**Grid Structure C3 fixed at 1.9 / C2 fixed at 2.3**

E(RB+HF-LYP) = -954.183792099

|                                              |                             |
|----------------------------------------------|-----------------------------|
| Zero-point correction=                       | 0.221137 (Hartree/Particle) |
| Thermal correction to Energy=                | 0.236348                    |
| Thermal correction to Enthalpy=              | 0.237292                    |
| Thermal correction to Gibbs Free Energy=     | 0.177963                    |
| Sum of electronic and zero-point Energies=   | -953.962655                 |
| Sum of electronic and thermal Energies=      | -953.947444                 |
| Sum of electronic and thermal Enthalpies=    | -953.946500                 |
| Sum of electronic and thermal Free Energies= | -954.005830                 |

|       | E (Thermal) | CV             | S              |
|-------|-------------|----------------|----------------|
|       | KCal/Mol    | Cal/Mol-Kelvin | Cal/Mol-Kelvin |
| Total | 148.311     | 53.501         | 124.869        |

C,0,2.5377477811,-0.4660829076,-0.2767100035  
 C,0,2.2500188656,0.8854184126,-0.065925926  
 O,0,0.6762869987,-0.7918343717,-0.0795932648  
 C,0,-0.0740127464,-1.00441826,-1.273995583  
 N,0,-1.1828171592,-1.4229301542,-0.5009975777  
 S,0,-2.1877017644,-0.1406719183,-0.059365176  
 O,0,-3.464979142,-0.3182013275,-0.7702398378  
 O,0,-1.5244977684,1.1802994727,-0.1396052224  
 C,0,3.1197434908,-1.4168530243,0.731729863  
 C,0,2.1182587522,1.4939206436,1.2929553957  
 C,0,1.8905510067,1.777972076,-1.2117144625  
 C,0,-2.4626725702,-0.5199570079,1.6780269898  
 H,0,2.6840066244,-0.7593728909,-1.3157439757  
 H,0,0.3239514348,-1.8298511404,-1.8772857302  
 H,0,-0.1739387367,-0.0890573901,-1.8696722432  
 H,0,2.8639298102,-2.4444319075,0.4596989282



H,0,2.7421988111,-1.2355957718,1.7402222319  
H,0,4.2149008993,-1.3361387384,0.7518370825  
H,0,2.6977170708,2.4244184707,1.3537035174  
H,0,2.4324095687,0.8328693785,2.1016600445  
H,0,1.0641684684,1.764520144,1.4490738722  
H,0,0.8255026686,2.0436634616,-1.1401735042  
H,0,2.0726843385,1.310859918,-2.183508174  
H,0,2.4575954749,2.7168675176,-1.16127403  
H,0,-3.1861308309,0.205762805,2.0566140402  
H,0,-1.5128322225,-0.4369993743,2.207833133  
H,0,-2.8601089339,-1.5332360104,1.7513724517

### Grid Structure C3 fixed at 2.0 / C2 fixed at 1.9

E(RB+HF-LYP) = -954.186683640

|                                              |                             |
|----------------------------------------------|-----------------------------|
| Zero-point correction=                       | 0.221035 (Hartree/Particle) |
| Thermal correction to Energy=                | 0.235260                    |
| Thermal correction to Enthalpy=              | 0.236204                    |
| Thermal correction to Gibbs Free Energy=     | 0.180063                    |
| Sum of electronic and zero-point Energies=   | -953.965649                 |
| Sum of electronic and thermal Energies=      | -953.951424                 |
| Sum of electronic and thermal Enthalpies=    | -953.950480                 |
| Sum of electronic and thermal Free Energies= | -954.006621                 |

|       | E (Thermal)<br>KCal/Mol | CV<br>Cal/Mol-Kelvin | S<br>Cal/Mol-Kelvin |
|-------|-------------------------|----------------------|---------------------|
| Total | 147.628                 | 51.738               | 118.159             |

C,0,2.7987168718,-0.5914731864,-0.4234072266  
C,0,2.1533497446,0.6012014705,-0.0019266194  
O,0,0.8282780735,-0.7551405213,-0.1224423909  
C,0,-0.1356095129,-0.8242276699,-1.24987159  
N,0,-1.2561566088,-1.1297668353,-0.4818882945  
S,0,-2.1003946828,0.2089681814,0.039293504  
O,0,-3.3268459575,0.3659802605,-0.7636327357  
O,0,-1.245210055,1.4136861831,0.2065436762  
C,0,3.4620896231,-1.6146460006,0.4331591124  
C,0,2.0395740388,1.0118365266,1.437197146  
C,0,1.8398673536,1.6797348052,-0.9989728668  
C,0,-2.5952434623,-0.336951714,1.6815750381  
H,0,2.922822528,-0.71072956,-1.4981565661  
H,0,0.1490213045,-1.660445824,-1.8966430076  
H,0,-0.1161410038,0.12248174,-1.8012964354  
H,0,3.237823858,-2.6210995584,0.0651393863  
H,0,3.1609771713,-1.5512980969,1.4798609055  
H,0,4.5540128899,-1.4875880378,0.3813728934  
H,0,2.8174685449,1.7506673418,1.6733145965  
H,0,2.1364037823,0.1723877792,2.1270548118  
H,0,1.0627228862,1.4815539249,1.5872445132  
H,0,0.8172857544,2.0385452051,-0.8411756868  
H,0,1.9584234376,1.3451578081,-2.0333889513  
H,0,2.5218837806,2.5247240475,-0.8337798979  
H,0,-3.2341553144,0.44252457,2.1027424239  
H,0,-1.7018213766,-0.4789529143,2.2913555848  
H,0,-3.146538669,-1.2731709251,1.5830376771

### Grid Structure C3 fixed at 2.0 / C2 fixed at 2.0

E(RB+HF-LYP) = -954.185103429

|                                              |                             |
|----------------------------------------------|-----------------------------|
| Zero-point correction=                       | 0.221194 (Hartree/Particle) |
| Thermal correction to Energy=                | 0.236340                    |
| Thermal correction to Enthalpy=              | 0.237284                    |
| Thermal correction to Gibbs Free Energy=     | 0.178017                    |
| Sum of electronic and zero-point Energies=   | -953.963909                 |
| Sum of electronic and thermal Energies=      | -953.948763                 |
| Sum of electronic and thermal Enthalpies=    | -953.947819                 |
| Sum of electronic and thermal Free Energies= | -954.007087                 |

|       | E (Thermal)<br>KCal/Mol | CV<br>Cal/Mol-Kelvin | S<br>Cal/Mol-Kelvin |
|-------|-------------------------|----------------------|---------------------|
| Total | 148.306                 | 53.626               | 124.739             |

C,0,2.738997432,-0.5818147933,-0.4014426152  
 C,0,2.1995929772,0.6487149671,0.0097460181  
 O,0,0.7626022742,-0.7346983021,-0.1359541028  
 C,0,-0.1155190114,-0.8066545746,-1.2953314465  
 N,0,-1.2337068051,-1.1617382624,-0.5274747575  
 S,0,-2.1133858467,0.1566154296,0.0151466342  
 O,0,-3.3827495424,0.2177923438,-0.7301303427  
 O,0,-1.3103662529,1.4017481631,0.1024560278  
 C,0,3.341662051,-1.6446954006,0.4571320004  
 C,0,2.0584317748,1.0562721359,1.4456414345  
 C,0,1.8926821287,1.7229050212,-0.9915966489  
 C,0,-2.4919364986,-0.3693168426,1.6944343577  
 H,0,2.8677857646,-0.7115426043,-1.4747724731  
 H,0,0.1914441605,-1.6236048769,-1.9575364706  
 H,0,-0.1303212947,0.1502503746,-1.829705358  
 H,0,3.0526195033,-2.6346918147,0.0902326168  
 H,0,3.0429323195,-1.564752471,1.5036190476  
 H,0,4.4388625479,-1.5865266967,0.4079877986  
 H,0,2.8197393164,1.8086699148,1.6937746638  
 H,0,2.1581970049,0.221291297,2.1403570809  
 H,0,1.0740888147,1.5157499743,1.5838997745  
 H,0,0.8582706489,2.0612356046,-0.8595800892  
 H,0,2.040879537,1.3922430836,-2.0234748817  
 H,0,2.5478582198,2.5859092054,-0.8108336163  
 H,0,-3.1459404299,0.3888534239,2.1311612762  
 H,0,-1.5604389443,-0.4504782444,2.2564130844  
 H,0,-2.9996768494,-1.3337770553,1.6481399872

### Grid Structure C3 fixed at 2.0 / C2 fixed at 2.1

E(RB+HF-LYP) = -954.184535262

|                                              |                             |
|----------------------------------------------|-----------------------------|
| Zero-point correction=                       | 0.221341 (Hartree/Particle) |
| Thermal correction to Energy=                | 0.236443                    |
| Thermal correction to Enthalpy=              | 0.237387                    |
| Thermal correction to Gibbs Free Energy=     | 0.178787                    |
| Sum of electronic and zero-point Energies=   | -953.963195                 |
| Sum of electronic and thermal Energies=      | -953.948092                 |
| Sum of electronic and thermal Enthalpies=    | -953.947148                 |
| Sum of electronic and thermal Free Energies= | -954.005749                 |

|       | E (Thermal)<br>KCal/Mol | CV<br>Cal/Mol-Kelvin | S<br>Cal/Mol-Kelvin |
|-------|-------------------------|----------------------|---------------------|
| Total | 148.370                 | 53.565               | 123.335             |

C,0,2.6869147216,-0.5742766064,-0.3820084092  
 C,0,2.2469759049,0.6865172151,0.016679522  
 O,0,0.7060322058,-0.7299153546,-0.1542253367  
 C,0,-0.1078496178,-0.7883758745,-1.3365402042  
 N,0,-1.2148119474,-1.1851672462,-0.5587249751

S,0,-2.121305321,0.1167504228,0.0091354988  
O,0,-3.4115148114,0.1118775926,-0.7001470854  
O,0,-1.3589979821,1.3862388633,0.0527272011  
C,0,3.2294813693,-1.6682668769,0.4828647032  
C,0,2.0915216562,1.1029343059,1.4476685906  
C,0,1.9512962224,1.7550951922,-0.993624008  
C,0,-2.421485792,-0.4071780461,1.7042822113  
H,0,2.8186191639,-0.7189251786,-1.4534333039  
H,0,0.2131108772,-1.5866070336,-2.0154154566  
H,0,-0.1507268246,0.1791978466,-1.8496152688  
H,0,2.8961360237,-2.6414559925,0.1093497046  
H,0,2.9165142234,-1.5787648517,1.5246715209  
H,0,4.328396374,-1.6637820836,0.4530168485  
H,0,2.8171581589,1.8921798952,1.6878811505  
H,0,2.2275894272,0.2833169239,2.1544474293  
H,0,1.0889789132,1.5246201149,1.5839490434  
H,0,0.9140085656,2.0933238953,-0.8768243861  
H,0,2.1078778347,1.4173373758,-2.0220873734  
H,0,2.5990145184,2.6241786632,-0.8149906284  
H,0,-3.0867343798,0.3314541699,2.1572395149  
H,0,-1.4681026894,-0.4488496392,2.232700065  
H,0,-2.8954917949,-1.3894986929,1.6833324316

## Grid Structure C3 fixed at 2.0 / C2 fixed at 2.2

E(RB+HF-LYP) = -954.184417553

|                                              |                             |
|----------------------------------------------|-----------------------------|
| Zero-point correction=                       | 0.221250 (Hartree/Particle) |
| Thermal correction to Energy=                | 0.236455                    |
| Thermal correction to Enthalpy=              | 0.237399                    |
| Thermal correction to Gibbs Free Energy=     | 0.178266                    |
| Sum of electronic and zero-point Energies=   | -953.963168                 |
| Sum of electronic and thermal Energies=      | -953.947963                 |
| Sum of electronic and thermal Enthalpies=    | -953.947019                 |
| Sum of electronic and thermal Free Energies= | -954.006151                 |

|       | E (Thermal) | CV             | S              |
|-------|-------------|----------------|----------------|
|       | KCal/Mol    | Cal/Mol-Kelvin | Cal/Mol-Kelvin |
| Total | 148.377     | 53.592         | 124.455        |

C,0,2.6357380451,-0.5658062846,-0.3605493328  
C,0,2.2898300551,0.7195150793,0.0219013527  
O,0,0.6506976877,-0.7334924269,-0.1830623448  
C,0,-0.113977885,-0.7662556794,-1.3833445958  
N,0,-1.2029204057,-1.2050898046,-0.5919984845  
S,0,-2.1338238586,0.0772855229,0.0102187691  
O,0,-3.4400933293,0.0152616912,-0.6641776045  
O,0,-1.4113157945,1.3673977245,0.0228141966  
C,0,3.1214193698,-1.6808460491,0.5159226758  
C,0,2.1276860174,1.1516208207,1.4472640043  
C,0,2.018029438,1.7825306467,-1.0013505251  
C,0,-2.3578761884,-0.4567523494,1.7134871491  
H,0,2.7714776028,-0.7285330167,-1.4291978802  
H,0,0.2179320332,-1.5429663865,-2.0817859027  
H,0,-0.1831116592,0.2137722791,-1.868611255  
H,0,2.7532415259,-2.6398474452,0.1390701666  
H,0,2.7930946963,-1.5779107137,1.5521423077  
H,0,4.2195939921,-1.7214946697,0.5070956989  
H,0,2.8412040835,1.9531943423,1.6825322169  
H,0,2.2708115926,0.3426655927,2.1649742764  
H,0,1.1199402866,1.564981787,1.5789065279

H,0,0.9814854777,2.1312612281,-0.9041276258  
H,0,2.1831738084,1.4327810481,-2.0246169952  
H,0,2.6669914703,2.6512575346,-0.8256163849  
H,0,-3.0319565811,0.259202738,2.1892163588  
H,0,-1.3857562945,-0.4652818461,2.2080862011  
H,0,-2.798910186,-1.4544923634,1.7071160293

### Grid Structure C3 fixed at 2.0 / C2 fixed at 2.3

E(RB+HF-LYP) = -954.184409746

|                                              |                             |
|----------------------------------------------|-----------------------------|
| Zero-point correction=                       | 0.221161 (Hartree/Particle) |
| Thermal correction to Energy=                | 0.236470                    |
| Thermal correction to Enthalpy=              | 0.237414                    |
| Thermal correction to Gibbs Free Energy=     | 0.177542                    |
| Sum of electronic and zero-point Energies=   | -953.963249                 |
| Sum of electronic and thermal Energies=      | -953.947940                 |
| Sum of electronic and thermal Enthalpies=    | -953.946996                 |
| Sum of electronic and thermal Free Energies= | -954.006868                 |

|       | E (Thermal)<br>KCal/Mol | CV<br>Cal/Mol-Kelvin | S<br>Cal/Mol-Kelvin |
|-------|-------------------------|----------------------|---------------------|
| Total | 148.387                 | 53.614               | 126.011             |

C,0,2.5803693177,-0.5597890365,-0.3346306848  
C,0,2.3302117052,0.7466236779,0.0257630835  
O,0,0.592160355,-0.7404443061,-0.2146599725  
C,0,-0.1269250076,-0.7285566002,-1.4325518738  
N,0,-1.1965064064,-1.2177475739,-0.6358306534  
S,0,-2.1533157807,0.0361125717,0.0137300707  
O,0,-3.4711422852,-0.0747268231,-0.6290601149  
O,0,-1.4712079907,1.345283236,0.0141111355  
C,0,3.0074695348,-1.6867681881,0.5612684839  
C,0,2.1830703293,1.2083221791,1.4439868841  
C,0,2.0886589212,1.8011340612,-1.0149444116  
C,0,-2.3030238226,-0.5257545274,1.7157825598  
H,0,2.7160459706,-0.7476939274,-1.3994398402  
H,0,0.2183465914,-1.4741878697,-2.1576274101  
H,0,-0.218990959,0.2688432822,-1.8754740132  
H,0,2.6095525302,-2.633969284,0.1854686757  
H,0,2.6594849456,-1.5632181488,1.5891535535  
H,0,4.1028849693,-1.7696658411,0.5787965012  
H,0,2.8762333633,2.0350981317,1.6497295222  
H,0,2.3602082676,0.4214737167,2.1788042008  
H,0,1.166828675,1.599342367,1.587493183  
H,0,1.0606485295,2.1787860384,-0.9292743992  
H,0,2.2446879653,1.4291490364,-2.0319182766  
H,0,2.7568263912,2.6583108629,-0.8556790147  
H,0,-2.9837271208,0.1624066374,2.2220818434  
H,0,-1.31467523,-0.5071886051,2.1765990919  
H,0,-2.7115687595,-1.5372160675,1.7106308757

### Grid Structure C3 fixed at 2.0 / C2 fixed at 2.4

E(RB+HF-LYP) = -954.184428793

|                                            |                             |
|--------------------------------------------|-----------------------------|
| Zero-point correction=                     | 0.221186 (Hartree/Particle) |
| Thermal correction to Energy=              | 0.236488                    |
| Thermal correction to Enthalpy=            | 0.237432                    |
| Thermal correction to Gibbs Free Energy=   | 0.177365                    |
| Sum of electronic and zero-point Energies= | -953.963242                 |
| Sum of electronic and thermal Energies=    | -953.947941                 |

Sum of electronic and thermal Enthalpies= -953.946996  
 Sum of electronic and thermal Free Energies= -954.007064

|       | E (Thermal)<br>KCal/Mol | CV<br>Cal/Mol-Kelvin | S<br>Cal/Mol-Kelvin |
|-------|-------------------------|----------------------|---------------------|
| Total | 148.399                 | 53.615               | 126.422             |

C,0,2.5227036122,-0.5709255187,-0.2873808616  
 C,0,2.3847848185,0.7670175662,-0.0150119295  
 O,0,0.5290603132,-0.7302719172,-0.287787632  
 C,0,-0.1728128444,-0.5372743007,-1.4917434705  
 N,0,-1.2045429175,-1.157985001,-0.728578036  
 S,0,-2.1770626635,-0.0150610768,0.1045126881  
 O,0,-3.5126223103,-0.1152935457,-0.4997672734  
 O,0,-1.5382950187,1.3085031376,0.21900619  
 C,0,2.8116150424,-1.6703239052,0.6974359833  
 C,0,2.1780068306,1.3228774844,1.3629489645  
 C,0,2.3033274472,1.7741545873,-1.1273578402  
 C,0,-2.2246377264,-0.769636016,1.7359944597  
 H,0,2.7017055002,-0.8370026346,-1.3289330893  
 H,0,0.1667597734,-1.1655219251,-2.3224353898  
 H,0,-0.2940818473,0.5127230163,-1.7750676322  
 H,0,2.3767898225,-2.6104536018,0.346466477  
 H,0,2.4016130956,-1.4641007703,1.6889011103  
 H,0,3.8948741572,-1.8200041066,0.800783545  
 H,0,2.7979649401,2.214997899,1.5185162287  
 H,0,2.3990329222,0.608284988,2.1580656989  
 H,0,1.129457935,1.6387902414,1.4634162744  
 H,0,1.3448109639,2.3100644247,-1.0909959516  
 H,0,2.412464969,1.3162726146,-2.1152265233  
 H,0,3.089269959,2.5340038717,-1.0148921916  
 H,0,-2.9041682865,-0.1695532353,2.3454396906  
 H,0,-1.2163188476,-0.7604287364,2.1513583327  
 H,0,-2.59709464,-1.7898945397,1.6346411779

### Grid Structure C3 fixed at 2.0 / C2 fixed at 2.5

E(RB+HF-LYP) = -954.184168206

|                                              |                             |
|----------------------------------------------|-----------------------------|
| Zero-point correction=                       | 0.221086 (Hartree/Particle) |
| Thermal correction to Energy=                | 0.235541                    |
| Thermal correction to Enthalpy=              | 0.236485                    |
| Thermal correction to Gibbs Free Energy=     | 0.179510                    |
| Sum of electronic and zero-point Energies=   | -953.963082                 |
| Sum of electronic and thermal Energies=      | -953.948627                 |
| Sum of electronic and thermal Enthalpies=    | -953.947683                 |
| Sum of electronic and thermal Free Energies= | -954.004658                 |

|       | E (Thermal)<br>KCal/Mol | CV<br>Cal/Mol-Kelvin | S<br>Cal/Mol-Kelvin |
|-------|-------------------------|----------------------|---------------------|
| Total | 147.804                 | 51.664               | 119.915             |

C,0,2.4518506157,-0.5700664968,-0.2411012486  
 C,0,2.4349870627,0.7860093614,-0.0622242301  
 O,0,0.4604978424,-0.720013619,-0.3508083443  
 C,0,-0.2281643091,-0.3292545484,-1.5075396243  
 N,0,-1.2268461745,-1.0777122354,-0.8102004189  
 S,0,-2.2033672452,-0.0784931223,0.2045725095  
 O,0,-3.5517605448,-0.1466685324,-0.3724727762  
 O,0,-1.5933575344,1.235137534,0.4680252002  
 C,0,2.6081831807,-1.6150331508,0.832496336  
 C,0,2.2080472526,1.449313764,1.2663245459  
 C,0,2.5170405068,1.7184843632,-1.2399732229  
 C,0,-2.1670766155,-1.0447358915,1.7200617728

H,0,2.6606389794,-0.9240699364,-1.2504373662  
H,0,0.0998426952,-0.819216953,-2.4300701541  
H,0,-0.3639413273,0.7507941414,-1.613623828  
H,0,2.1339477164,-2.5492029111,0.5191803139  
H,0,2.1545021416,-1.3126261445,1.7797486824  
H,0,3.6708661608,-1.8224543277,1.0159913086  
H,0,2.8406209275,2.3394529588,1.3720560572  
H,0,2.3997520161,0.7907195391,2.1160070593  
H,0,1.1626289286,1.7866036613,1.3278807896  
H,0,1.6437175492,2.3843911007,-1.2802245864  
H,0,2.5920461553,1.1829360198,-2.1916158724  
H,0,3.3962062467,2.3724672946,-1.1495463859  
H,0,-2.8393669381,-0.5527488393,2.426610277  
H,0,-1.1441366693,-1.0560620959,2.0976494238  
H,0,-2.5147536196,-2.0539919337,1.495542782

## Grid Structure C3 fixed at 2.1 / C2 fixed at 1.9

E(RB+HF-LYP) = -954.184173881

|                                              |                             |
|----------------------------------------------|-----------------------------|
| Zero-point correction=                       | 0.221328 (Hartree/Particle) |
| Thermal correction to Energy=                | 0.236334                    |
| Thermal correction to Enthalpy=              | 0.237278                    |
| Thermal correction to Gibbs Free Energy=     | 0.179048                    |
| Sum of electronic and zero-point Energies=   | -953.962846                 |
| Sum of electronic and thermal Energies=      | -953.947840                 |
| Sum of electronic and thermal Enthalpies=    | -953.946896                 |
| Sum of electronic and thermal Free Energies= | -954.005126                 |

|       | E (Thermal) | CV             | S              |
|-------|-------------|----------------|----------------|
|       | KCal/Mol    | Cal/Mol-Kelvin | Cal/Mol-Kelvin |
| Total | 148.302     | 53.618         | 122.557        |

C,0,2.8385424369,-0.576164802,-0.415526957  
C,0,2.143152997,0.5787660076,-0.0059142656  
O,0,0.7625579692,-0.7203350453,-0.1335703552  
C,0,-0.1365314053,-0.7922838089,-1.2789418775  
N,0,-1.248483926,-1.1259704989,-0.4917350085  
S,0,-2.1243367072,0.2018931432,0.0309021797  
O,0,-3.3780426202,0.2743909564,-0.7397554006  
O,0,-1.3105390456,1.4383416078,0.1314095376  
C,0,3.4633510816,-1.6171567157,0.4474321313  
C,0,2.0009194173,0.9849888972,1.4350563298  
C,0,1.8511681207,1.6709372708,-0.9990489554  
C,0,-2.5396682677,-0.3189699107,1.7027124971  
H,0,2.9816460439,-0.6938077418,-1.488516747  
H,0,0.1523635639,-1.618999367,-1.9363422823  
H,0,-0.1498673412,0.1584778659,-1.8230761061  
H,0,3.2233074569,-2.618642713,0.0737146821  
H,0,3.1504237436,-1.5506711591,1.4905374401  
H,0,4.559127358,-1.5184742634,0.4118642298  
H,0,2.7897273301,1.7028516133,1.6974000476  
H,0,2.0613737715,0.1382301909,2.1206181673  
H,0,1.0323180484,1.475674648,1.5678638676  
H,0,0.8305692498,2.0399966011,-0.8558880901  
H,0,1.9811509139,1.3428056735,-2.0345902927  
H,0,2.5388371228,2.5085623929,-0.8208934591  
H,0,-3.1933998004,0.4468281836,2.1262885052  
H,0,-1.6201150355,-0.4094551084,2.2826820886  
H,0,-3.0569474764,-1.2778549181,1.6476270934

## Grid Structure C3 fixed at 2.1 / C2 fixed at 2.0

E(RB+HF-LYP) = -954.183768454

|                                              |                             |
|----------------------------------------------|-----------------------------|
| Zero-point correction=                       | 0.221456 (Hartree/Particle) |
| Thermal correction to Energy=                | 0.236479                    |
| Thermal correction to Enthalpy=              | 0.237424                    |
| Thermal correction to Gibbs Free Energy=     | 0.179195                    |
| Sum of electronic and zero-point Energies=   | -953.962312                 |
| Sum of electronic and thermal Energies=      | -953.947289                 |
| Sum of electronic and thermal Enthalpies=    | -953.946345                 |
| Sum of electronic and thermal Free Energies= | -954.004574                 |

|       | E (Thermal)<br>KCal/Mol | CV<br>Cal/Mol-Kelvin | S<br>Cal/Mol-Kelvin |
|-------|-------------------------|----------------------|---------------------|
| Total | 148.393                 | 53.564               | 122.553             |

C,0,2.7845177473,-0.5650386918,-0.3959800425  
C,0,2.1893558826,0.627185648,0.0101106893  
O,0,0.7040338156,-0.7030329987,-0.1459008246  
C,0,-0.1159727776,-0.7811022329,-1.3230049933  
N,0,-1.2145087836,-1.158294205,-0.5230658077  
S,0,-2.1305522337,0.1523806541,0.0092775119  
O,0,-3.4107976856,0.130874786,-0.7172763962  
O,0,-1.3706333075,1.4229654045,0.0395199495  
C,0,3.3494154169,-1.6478454579,0.4625765076  
C,0,2.0188744043,1.026096802,1.4484665277  
C,0,1.8991392659,1.715904614,-0.9854708417  
C,0,-2.4501361709,-0.3435428215,1.7089604472  
H,0,2.9282966945,-0.6903002555,-1.4684395565  
H,0,0.1974923474,-1.593387023,-1.9877293176  
H,0,-0.1625123786,0.1761083753,-1.8540284451  
H,0,3.0202374978,-2.6289755658,0.1033022547  
H,0,3.0647580535,-1.5528989047,1.5118098522  
H,0,4.44775663,-1.6363323115,0.4041927321  
H,0,2.7916068457,1.7561752325,1.7256803464  
H,0,2.0816319063,0.1811555219,2.1360350023  
H,0,1.0431076643,1.5066525531,1.5709498916  
H,0,0.8674918795,2.0649135427,-0.8653039428  
H,0,2.0564121229,1.3924330386,-2.0187964324  
H,0,2.5610907985,2.5712873833,-0.7934170791  
H,0,-3.1209968158,0.4023079093,2.1412839073  
H,0,-1.5031652794,-0.3753291594,2.2494816703  
H,0,-2.9233385404,-1.3264028376,1.6990753892

### Grid Structure C3 fixed at 2.1 / C2 fixed at 2.1

E(RB+HF-LYP) = -954.184311349

|                                              |                             |
|----------------------------------------------|-----------------------------|
| Zero-point correction=                       | 0.221405 (Hartree/Particle) |
| Thermal correction to Energy=                | 0.236514                    |
| Thermal correction to Enthalpy=              | 0.237458                    |
| Thermal correction to Gibbs Free Energy=     | 0.178822                    |
| Sum of electronic and zero-point Energies=   | -953.962907                 |
| Sum of electronic and thermal Energies=      | -953.947797                 |
| Sum of electronic and thermal Enthalpies=    | -953.946853                 |
| Sum of electronic and thermal Free Energies= | -954.005489                 |

|       | E (Thermal)<br>KCal/Mol | CV<br>Cal/Mol-Kelvin | S<br>Cal/Mol-Kelvin |
|-------|-------------------------|----------------------|---------------------|
| Total | 148.415                 | 53.593               | 123.409             |

C,0,2.735291824,-0.5579527761,-0.3762200866  
C,0,2.2345565765,0.6663992645,0.0186684373  
O,0,0.6500058623,-0.698503563,-0.1716889179  
C,0,-0.1102368595,-0.7629383329,-1.3717914734

N,0,-1.1837456911,-1.181294441,-0.5475775466  
 S,0,-2.1325882637,0.11171528,0.0076938038  
 O,0,-3.4285255507,0.0192527192,-0.6820801016  
 O,0,-1.4183623902,1.4056039959,-0.0067034954  
 C,0,3.2332354954,-1.6735878832,0.4870207077  
 C,0,2.0399400948,1.0736549482,1.4509472095  
 C,0,1.9592551833,1.7493318846,-0.9872844011  
 C,0,-2.371497788,-0.3794207465,1.7213148928  
 H,0,2.8852919903,-0.6964755738,-1.4465865371  
 H,0,0.2186421389,-1.5575390207,-2.0502771064  
 H,0,-0.18844335,0.203808661,-1.8807619493  
 H,0,2.8560654015,-2.6339621513,0.1196332188  
 H,0,2.9352239103,-1.5693170539,1.5319484611  
 H,0,4.3310199206,-1.7204026669,0.448662106  
 H,0,2.7778633676,1.8399397621,1.7255241033  
 H,0,2.1335768552,0.2426564774,2.1520458571  
 H,0,1.0451574687,1.5184430129,1.5642684396  
 H,0,0.925019523,2.0992442335,-0.8859726835  
 H,0,2.1283783071,1.4178476647,-2.016355814  
 H,0,2.6139603602,2.6105220145,-0.7958586057  
 H,0,-3.0534213117,0.3459905153,2.1707420251  
 H,0,-1.4047406913,-0.3701771807,2.2263353317  
 H,0,-2.8083173833,-1.378880044,1.7366631246

### Grid Structure C3 fixed at 2.1 / C2 fixed at 2.2

E(RB+HF-LYP) = -954.185319565

|                                              |                             |
|----------------------------------------------|-----------------------------|
| Zero-point correction=                       | 0.221243 (Hartree/Particle) |
| Thermal correction to Energy=                | 0.236487                    |
| Thermal correction to Enthalpy=              | 0.237431                    |
| Thermal correction to Gibbs Free Energy=     | 0.178028                    |
| Sum of electronic and zero-point Energies=   | -953.964077                 |
| Sum of electronic and thermal Energies=      | -953.948833                 |
| Sum of electronic and thermal Enthalpies=    | -953.947889                 |
| Sum of electronic and thermal Free Energies= | -954.007292                 |

|       | E (Thermal) | CV             | S              |
|-------|-------------|----------------|----------------|
|       | KCal/Mol    | Cal/Mol-Kelvin | Cal/Mol-Kelvin |
| Total | 148.398     | 53.672         | 125.024        |

C,0,2.6822387861,-0.5518268548,-0.3512490694  
 C,0,2.2709374493,0.699508679,0.0269541465  
 O,0,0.5921615246,-0.7019275304,-0.2132242378  
 C,0,-0.118014224,-0.7343874588,-1.4344444354  
 N,0,-1.1591654153,-1.2003761562,-0.58610657  
 S,0,-2.1396318968,0.0677513594,0.0108912924  
 O,0,-3.4533993787,-0.0966727653,-0.6267008095  
 O,0,-1.4774810601,1.3848409794,-0.0476812358  
 C,0,3.1093895855,-1.6910203991,0.523821192  
 C,0,2.0533717259,1.1233262855,1.4511531826  
 C,0,2.0303982818,1.777442921,-0.9939029294  
 C,0,-2.2749490198,-0.4256089023,1.7347758755  
 H,0,2.8421634852,-0.7082088771,-1.4180951616  
 H,0,0.22536574,-1.5045865253,-2.1328849274  
 H,0,-0.2270728716,0.2460291619,-1.9089306426  
 H,0,2.6954501405,-2.6325523041,0.1478597028  
 H,0,2.7896175582,-1.5741235832,1.5614052415  
 H,0,4.2040727799,-1.7891524644,0.5150553192  
 H,0,2.7779696786,1.9009464646,1.7294415853  
 H,0,2.1444292939,0.3031025679,2.1654268214  
 H,0,1.0530968798,1.5623183661,1.5477686826  
 H,0,0.9962327899,2.1374138608,-0.9243201784  
 H,0,2.2209503147,1.4345079378,-2.0156651955  
 H,0,2.6832806493,2.6389455864,-0.797452401



H,0,-2.965100096,0.2725571016,2.2137744075  
H,0,-1.2860360848,-0.3717138139,2.1915765377  
H,0,-2.6676716162,-1.4425746366,1.7730628066

### Grid Structure C3 fixed at 2.1 / C2 fixed at 2.3

E(RB+HF-LYP) = -954.186567401

|                                              |                             |
|----------------------------------------------|-----------------------------|
| Zero-point correction=                       | 0.221381 (Hartree/Particle) |
| Thermal correction to Energy=                | 0.236614                    |
| Thermal correction to Enthalpy=              | 0.237559                    |
| Thermal correction to Gibbs Free Energy=     | 0.178031                    |
| Sum of electronic and zero-point Energies=   | -953.965186                 |
| Sum of electronic and thermal Energies=      | -953.949953                 |
| Sum of electronic and thermal Enthalpies=    | -953.949009                 |
| Sum of electronic and thermal Free Energies= | -954.008537                 |

|       | E (Thermal)<br>KCal/Mol | CV<br>Cal/Mol-Kelvin | S<br>Cal/Mol-Kelvin |
|-------|-------------------------|----------------------|---------------------|
| Total | 148.478                 | 53.610               | 125.287             |

C,0,2.6351179076,-0.5576147565,-0.3163903056  
C,0,2.3176161072,0.7273729516,0.0078507598  
O,0,0.5410839017,-0.707542821,-0.2659126959  
C,0,-0.1409693351,-0.6342056566,-1.4936134799  
N,0,-1.1413845357,-1.1815842685,-0.6368715187  
S,0,-2.138155241,0.0348543188,0.0672005894  
O,0,-3.4546512356,-0.1182583037,-0.5650376352  
O,0,-1.4944546372,1.3596549467,0.0845510511  
C,0,2.9692099924,-1.6915203512,0.6087110162  
C,0,2.0687378385,1.2139270488,1.4073671015  
C,0,2.1573674856,1.7781744144,-1.0581619214  
C,0,-2.2276009818,-0.5827624376,1.752966501  
H,0,2.8151058362,-0.764891365,-1.3716637518  
H,0,0.2001225707,-1.3432442999,-2.2542223299  
H,0,-0.27417773,0.3811008167,-1.8779156872  
H,0,2.50230861,-2.6172946899,0.2568573925  
H,0,2.6330252683,-1.5168946133,1.6332208411  
H,0,4.054812311,-1.859865066,0.6329212422  
H,0,2.7294107493,2.0591649065,1.6427193651  
H,0,2.2188346588,0.4451137365,2.1678255318  
H,0,1.0368514269,1.5812375118,1.4824475845  
H,0,1.1515807657,2.2165036657,-1.0162109478  
H,0,2.3282071877,1.3812960742,-2.0640264258  
H,0,2.8665210142,2.6014132067,-0.894590519  
H,0,-2.9169333898,0.069552264,2.2937207907  
H,0,-1.2298059019,-0.5439185879,2.1915293328  
H,0,-2.6051756438,-1.6058096454,1.7270371183

### Grid Structure C3 fixed at 2.1 / C2 fixed at 2.4

E(RB+HF-LYP) = -954.187655917

|                                              |                             |
|----------------------------------------------|-----------------------------|
| Zero-point correction=                       | 0.221096 (Hartree/Particle) |
| Thermal correction to Energy=                | 0.235560                    |
| Thermal correction to Enthalpy=              | 0.236504                    |
| Thermal correction to Gibbs Free Energy=     | 0.179605                    |
| Sum of electronic and zero-point Energies=   | -953.966560                 |
| Sum of electronic and thermal Energies=      | -953.952096                 |
| Sum of electronic and thermal Enthalpies=    | -953.951152                 |
| Sum of electronic and thermal Free Energies= | -954.008051                 |

|  | E (Thermal)<br>KCal/Mol | CV<br>Cal/Mol-Kelvin | S<br>Cal/Mol-Kelvin |
|--|-------------------------|----------------------|---------------------|
|--|-------------------------|----------------------|---------------------|

Total 147.816 51.737 119.755

C,0,2.5788785303,-0.5520723811,-0.2901988715  
 C,0,2.3532717983,0.7521401298,0.010679529  
 O,0,0.4858000279,-0.7217039596,-0.3060672792  
 C,0,-0.1631174344,-0.5871240843,-1.5430039655  
 N,0,-1.1305484105,-1.190295858,-0.6799335422  
 S,0,-2.1578393804,-0.0131455207,0.0759370868  
 O,0,-3.4797583556,-0.2159324547,-0.5273934041  
 O,0,-1.5590421515,1.3305146876,0.0893915938  
 C,0,2.8530026109,-1.686563973,0.6568788403  
 C,0,2.1190976536,1.2735580665,1.4012641651  
 C,0,2.2345582658,1.7893910449,-1.0751408409  
 C,0,-2.1686480045,-0.6596252628,1.7531002726  
 H,0,2.7530946832,-0.7900449673,-1.3402509375  
 H,0,0.1874856064,-1.2582112611,-2.3320640242  
 H,0,-0.3173522899,0.4434374524,-1.8719750496  
 H,0,2.3515559894,-2.5971938907,0.3136139099  
 H,0,2.5104569808,-1.4822311107,1.6742881102  
 H,0,3.9298540228,-1.9001859836,0.7010060071  
 H,0,2.7870899855,2.1184883206,1.6156645005  
 H,0,2.2683510716,0.5204918692,2.1778065101  
 H,0,1.0904264763,1.6516883203,1.4800817832  
 H,0,1.2430488055,2.2622770855,-1.0505649432  
 H,0,2.3968046422,1.3674955639,-2.0724660882  
 H,0,2.967777408,2.594103753,-0.9258617026  
 H,0,-2.8653748505,-0.0427397206,2.3250562681  
 H,0,-1.159483164,-0.586332819,2.1601415531  
 H,0,-2.5067855173,-1.6962240463,1.7223195191

**Grid Structure C3 fixed at 2.1 / C2 fixed at 2.5**

E(RB+HF-LYP) = -954.188469551

|                                              |                             |
|----------------------------------------------|-----------------------------|
| Zero-point correction=                       | 0.221045 (Hartree/Particle) |
| Thermal correction to Energy=                | 0.235551                    |
| Thermal correction to Enthalpy=              | 0.236495                    |
| Thermal correction to Gibbs Free Energy=     | 0.179197                    |
| Sum of electronic and zero-point Energies=   | -953.967425                 |
| Sum of electronic and thermal Energies=      | -953.952919                 |
| Sum of electronic and thermal Enthalpies=    | -953.951975                 |
| Sum of electronic and thermal Free Energies= | -954.009273                 |

|       | E (Thermal) | CV             | S              |
|-------|-------------|----------------|----------------|
|       | KCal/Mol    | Cal/Mol-Kelvin | Cal/Mol-Kelvin |
| Total | 147.810     | 51.756         | 120.594        |

C,0,2.5156724615,-0.5536111017,-0.2475036132  
 C,0,2.398420455,0.7755181147,-0.0188637352  
 O,0,0.425235714,-0.7222364974,-0.3554162199  
 C,0,-0.2071469768,-0.431351648,-1.5714200431  
 N,0,-1.1431970512,-1.1493651331,-0.7570807596  
 S,0,-2.1877519842,-0.0754227834,0.1410761131  
 O,0,-3.5167835853,-0.2702025281,-0.4465059511  
 O,0,-1.62456266,1.2771821213,0.2581302604  
 C,0,2.6861114286,-1.6521674356,0.7666271788  
 C,0,2.1590106918,1.3860346417,1.3356480675  
 C,0,2.4020801138,1.7606164338,-1.1597959691  
 C,0,-2.1199365391,-0.8766474497,1.7484601299  
 H,0,2.7026851199,-0.8606847204,-1.2772689697  
 H,0,0.1433421167,-1.0002092183,-2.4362021805  
 H,0,-0.3773503418,0.6300109249,-1.763398892  
 H,0,2.145701304,-2.5499765588,0.4503792733

H,0,2.3189556583,-1.3751376654,1.7583736236  
H,0,3.7461894898,-1.9230063264,0.8662316112  
H,0,2.8411758132,2.2288935069,1.5092526301  
H,0,2.2848866399,0.6780445804,2.1577309989  
H,0,1.1365229311,1.7872033672,1.3840877786  
H,0,1.4652398116,2.3350332668,-1.1884944328  
H,0,2.5397417051,1.2717752535,-2.1300982517  
H,0,3.2096081656,2.4959697288,-1.0366279163  
H,0,-2.8133275261,-0.3384246925,2.3984523329  
H,0,-1.099131414,-0.8076905551,2.1259326634  
H,0,-2.4287865413,-1.9161886262,1.6306032723

### Grid Structure C3 fixed at 2.2 / C2 fixed at 1.9

E(RB+HF-LYP) = -954.182350026

|                                              |                             |
|----------------------------------------------|-----------------------------|
| Zero-point correction=                       | 0.221474 (Hartree/Particle) |
| Thermal correction to Energy=                | 0.236425                    |
| Thermal correction to Enthalpy=              | 0.237370                    |
| Thermal correction to Gibbs Free Energy=     | 0.179426                    |
| Sum of electronic and zero-point Energies=   | -953.960876                 |
| Sum of electronic and thermal Energies=      | -953.945925                 |
| Sum of electronic and thermal Enthalpies=    | -953.944980                 |
| Sum of electronic and thermal Free Energies= | -954.002924                 |

|       | E (Thermal)<br>KCal/Mol | CV<br>Cal/Mol-Kelvin | S<br>Cal/Mol-Kelvin |
|-------|-------------------------|----------------------|---------------------|
| Total | 148.359                 | 53.549               | 121.953             |

C,0,2.8826736138,-0.5580351034,-0.4152957143  
C,0,2.1364179883,0.5537913054,-0.0040702354  
O,0,0.7059952633,-0.6909277262,-0.1247686323  
C,0,-0.1374043825,-0.7822729621,-1.2875224998  
N,0,-1.241057538,-1.125829255,-0.4790746128  
S,0,-2.1510868143,0.1994646201,0.0155149739  
O,0,-3.4114192478,0.1920268103,-0.7462553648  
O,0,-1.3751678793,1.4599314829,0.0582388319  
C,0,3.4942525728,-1.6135541561,0.4391185268  
C,0,1.9834194224,0.9469316831,1.4425598108  
C,0,1.8445436723,1.6617040316,-0.984091647  
C,0,-2.5247450605,-0.2789044012,1.7090233117  
H,0,3.0387603701,-0.6637956832,-1.4882802907  
H,0,0.1591237911,-1.6121419171,-1.9377874079  
H,0,-0.1748300218,0.1629159267,-1.839960284  
H,0,3.2227906508,-2.6107005521,0.0725576382  
H,0,3.2027095669,-1.5381739639,1.4878449803  
H,0,4.5915534296,-1.5470347826,0.3831410338  
H,0,2.7825917631,1.6451834466,1.7248065366  
H,0,2.0191109148,0.0899902506,2.1176317486  
H,0,1.0235065153,1.454197494,1.5736207129  
H,0,0.8225391598,2.0273795185,-0.8443199324  
H,0,1.9810126928,1.3475573399,-2.0235335856  
H,0,2.5290575084,2.4990769808,-0.7935520228  
H,0,-3.1952307877,0.4806574077,2.1173691806  
H,0,-1.5937024625,-0.3211053254,2.2759450884  
H,0,-3.0128097011,-1.2543734697,1.6934488552

### Grid Structure C3 fixed at 2.2 / C2 fixed at 2.0

E(RB+HF-LYP) = -954.183113434

|                                              |                             |
|----------------------------------------------|-----------------------------|
| Zero-point correction=                       | 0.221578 (Hartree/Particle) |
| Thermal correction to Energy=                | 0.236558                    |
| Thermal correction to Enthalpy=              | 0.237502                    |
| Thermal correction to Gibbs Free Energy=     | 0.179433                    |
| Sum of electronic and zero-point Energies=   | -953.961535                 |
| Sum of electronic and thermal Energies=      | -953.946556                 |
| Sum of electronic and thermal Enthalpies=    | -953.945612                 |
| Sum of electronic and thermal Free Energies= | -954.003681                 |

|       | E (Thermal)<br>KCal/Mol | CV<br>Cal/Mol-Kelvin | S<br>Cal/Mol-Kelvin |
|-------|-------------------------|----------------------|---------------------|
| Total | 148.442                 | 53.538               | 122.217             |

C,0,2.8383010911,-0.5603658042,-0.3901621039  
 C,0,2.1865286494,0.5897340494,0.0184119408  
 O,0,0.6561182033,-0.6878669944,-0.1415317409  
 C,0,-0.1117471138,-0.7862075057,-1.3356116672  
 N,0,-1.1894217615,-1.169037317,-0.4994050685  
 S,0,-2.1430176102,0.1396639267,0.0023154137  
 O,0,-3.4251033409,0.0353761818,-0.7115525563  
 O,0,-1.4234756748,1.4301494449,-0.0287924408  
 C,0,3.3823889409,-1.6612802009,0.4589940495  
 C,0,1.9932232491,0.9713699413,1.4617652003  
 C,0,1.899688524,1.695099955,-0.9642264759  
 C,0,-2.4183486522,-0.3081011053,1.7221880401  
 H,0,3.0005402694,-0.6707005332,-1.4621801313  
 H,0,0.2100429186,-1.6042896869,-1.9887123593  
 H,0,-0.1838634082,0.1636369645,-1.8761594879  
 H,0,3.0236257624,-2.6338756434,0.1020509568  
 H,0,3.1132512248,-1.5626670624,1.5121120605  
 H,0,4.4797771846,-1.6825354422,0.3881810354  
 H,0,2.7716152014,1.68405313,1.7663486554  
 H,0,2.0302166966,0.1143632718,2.1367525907  
 H,0,1.0232744231,1.4646920564,1.5770209816  
 H,0,0.8665940169,2.0411769313,-0.8520710921  
 H,0,2.0680797329,1.3862881767,-2.0007498073  
 H,0,2.5578133858,2.5497601381,-0.7566063608  
 H,0,-3.1040523436,0.4322975334,2.1403137709  
 H,0,-1.4615465593,-0.2920343968,2.2457423216  
 H,0,-2.8616560436,-1.3042920823,1.7536057273

### Grid Structure C3 fixed at 2.2 / C2 fixed at 2.1

E(RB+HF-LYP) = -954.184837784

|                                              |                             |
|----------------------------------------------|-----------------------------|
| Zero-point correction=                       | 0.221439 (Hartree/Particle) |
| Thermal correction to Energy=                | 0.236565                    |
| Thermal correction to Enthalpy=              | 0.237509                    |
| Thermal correction to Gibbs Free Energy=     | 0.178772                    |
| Sum of electronic and zero-point Energies=   | -953.963399                 |
| Sum of electronic and thermal Energies=      | -953.948273                 |
| Sum of electronic and thermal Enthalpies=    | -953.947329                 |
| Sum of electronic and thermal Free Energies= | -954.006066                 |

|       | E (Thermal)<br>KCal/Mol | CV<br>Cal/Mol-Kelvin | S<br>Cal/Mol-Kelvin |
|-------|-------------------------|----------------------|---------------------|
| Total | 148.447                 | 53.622               | 123.623             |

C,0,2.79246567,-0.5411080745,-0.3663386144  
 C,0,2.2293860826,0.6423446962,0.0322998179  
 O,0,0.6049941282,-0.6727517867,-0.1723173557  
 C,0,-0.1032939672,-0.7567102355,-1.391385041  
 N,0,-1.1419314861,-1.1791291694,-0.5166563015  
 S,0,-2.1358628407,0.1104201715,0.0061293431  
 O,0,-3.430446624,-0.0730303927,-0.6645528579

O,0,-1.467856538,1.4228654295,-0.0768252136  
 C,0,3.2631962153,-1.677727105,0.48538338  
 C,0,1.9999025205,1.0289693512,1.4683506649  
 C,0,1.9612479019,1.7432159504,-0.9605846753  
 C,0,-2.3222562188,-0.3250147346,1.7405329635  
 H,0,2.9653446314,-0.6623913687,-1.4359736341  
 H,0,0.2359264538,-1.5579150202,-2.0556174237  
 H,0,-0.2103071019,0.2021435611,-1.9083562137  
 H,0,2.8490004359,-2.6253372244,0.1218002519  
 H,0,2.9855335627,-1.5684057415,1.5356167734  
 H,0,4.3577497658,-1.7650214154,0.4314575033  
 H,0,2.7394080864,1.7804115179,1.7772631712  
 H,0,2.066507035,0.1841138274,2.1565273275  
 H,0,1.0083891233,1.4835503805,1.5683198176  
 H,0,0.9240344759,2.0871268683,-0.8748168158  
 H,0,2.1509371451,1.4288585852,-1.9919597382  
 H,0,2.6075271863,2.6056845885,-0.7473203537  
 H,0,-3.0195813856,0.3939328459,2.1764308623  
 H,0,-1.3463283318,-0.2628502263,2.2236312797  
 H,0,-2.7242321832,-1.3372048266,1.8015342567

### Grid Structure C3 fixed at 2.2 / C2 fixed at 2.2

|                                              |                             |
|----------------------------------------------|-----------------------------|
| Zero-point correction=                       | 0.221258 (Hartree/Particle) |
| Thermal correction to Energy=                | 0.236528                    |
| Thermal correction to Enthalpy=              | 0.237472                    |
| Thermal correction to Gibbs Free Energy=     | 0.177863                    |
| Sum of electronic and zero-point Energies=   | -953.965814                 |
| Sum of electronic and thermal Energies=      | -953.950544                 |
| Sum of electronic and thermal Enthalpies=    | -953.949600                 |
| Sum of electronic and thermal Free Energies= | -954.009209                 |

|       | E (Thermal)<br>KCal/Mol | CV<br>Cal/Mol-Kelvin | S<br>Cal/Mol-Kelvin |
|-------|-------------------------|----------------------|---------------------|
| Total | 148.423                 | 53.716               | 125.457             |

C,0,2.7461384257,-0.5232607993,-0.3401974675  
 C,0,2.2672293655,0.6892535758,0.0437359652  
 O,0,0.5544960843,-0.667284458,-0.213841241  
 C,0,-0.1043144414,-0.7182637033,-1.4554615288  
 N,0,-1.0979417196,-1.1846437459,-0.5439069961  
 S,0,-2.1302314899,0.0808297534,0.014625619  
 O,0,-3.4340850092,-0.1715354317,-0.6103503494  
 O,0,-1.5128015856,1.4120389718,-0.1074490126  
 C,0,3.1438630944,-1.6848550613,0.5197272445  
 C,0,2.0074317957,1.0911707089,1.4704484757  
 C,0,2.0324965658,1.7853351681,-0.9635853657  
 C,0,-2.2230069833,-0.3540631028,1.7563412383  
 H,0,2.9297049337,-0.6613315705,-1.4065533691  
 H,0,0.2496876548,-1.4966068229,-2.1373627034  
 H,0,-0.244345473,0.2536352229,-1.9366907791  
 H,0,2.6853748075,-2.6093676157,0.150023729  
 H,0,2.8522968561,-1.5621430628,1.5651816861  
 H,0,4.2328069163,-1.8302635443,0.4883827616  
 H,0,2.7183008037,1.8693036246,1.7808108115  
 H,0,2.0886021119,0.2606427774,2.1747300052  
 H,0,1.0021624422,1.5212219195,1.5527276336  
 H,0,0.996084868,2.1404887032,-0.9075956127  
 H,0,2.2415245722,1.4589601374,-1.9877017059  
 H,0,2.6777418709,2.6480219566,-0.7473665553  
 H,0,-2.9271517206,0.3407139123,2.2195430512  
 H,0,-1.2295777337,-0.2514667874,2.1947409747  
 H,0,-2.5838198855,-1.3802320566,1.8375425954

### Grid Structure C3 fixed at 2.2 / C2 fixed at 2.3

E(RB+HF-LYP) = -954.189428451

|                                              |                             |
|----------------------------------------------|-----------------------------|
| Zero-point correction=                       | 0.221135 (Hartree/Particle) |
| Thermal correction to Energy=                | 0.235569                    |
| Thermal correction to Enthalpy=              | 0.236513                    |
| Thermal correction to Gibbs Free Energy=     | 0.179874                    |
| Sum of electronic and zero-point Energies=   | -953.968293                 |
| Sum of electronic and thermal Energies=      | -953.953860                 |
| Sum of electronic and thermal Enthalpies=    | -953.952915                 |
| Sum of electronic and thermal Free Energies= | -954.009554                 |

|       | E (Thermal)<br>KCal/Mol | CV<br>Cal/Mol-Kelvin | S<br>Cal/Mol-Kelvin |
|-------|-------------------------|----------------------|---------------------|
| Total | 147.822                 | 51.773               | 119.206             |

C,0,2.7013196633,-0.5102184747,-0.3164387686  
C,0,2.3041565583,0.7288535497,0.0503955651  
O,0,0.5086022203,-0.6765961619,-0.2507552327  
C,0,-0.1106080802,-0.6776581579,-1.5104559317  
N,0,-1.0687430169,-1.1868994498,-0.5781422948  
S,0,-2.1288492969,0.0547263117,0.0242219646  
O,0,-3.4362098438,-0.2378201489,-0.5719053044  
O,0,-1.5459906928,1.3986296366,-0.1071192167  
C,0,3.0406499506,-1.6823661858,0.5575659843  
C,0,2.0360879604,1.1565338259,1.4684258262  
C,0,2.1009220418,1.8165881141,-0.9736618884  
C,0,-2.1524446017,-0.4005819907,1.7628092146  
H,0,2.8830731622,-0.672695692,-1.380135942  
H,0,0.252906673,-1.429983036,-2.2146339733  
H,0,-0.2689089432,0.3106128448,-1.9479858532  
H,0,2.5419658207,-2.5884197058,0.1944543181  
H,0,2.7471706148,-1.5372110188,1.6000651045  
H,0,4.1218310503,-1.8781185847,0.537877162  
H,0,2.729002453,1.9556325737,1.7659306135  
H,0,2.1321141872,0.3436926785,2.1915683148  
H,0,1.0221578468,1.570176999,1.5431244928  
H,0,1.067285916,2.1856151877,-0.9431547768  
H,0,2.3232932693,1.4750116865,-1.9902597204  
H,0,2.7494485126,2.6774280332,-0.7595437367  
H,0,-2.8572116307,0.2725658061,2.2559705364  
H,0,-1.1474175427,-0.2762488576,2.1679296182  
H,0,-2.4856359447,-1.4359944419,1.8446364936

### Grid Structure C3 fixed at 2.2 / C2 fixed at 2.4

E(RB+HF-LYP) = -954.191493447

|                                              |                             |
|----------------------------------------------|-----------------------------|
| Zero-point correction=                       | 0.221002 (Hartree/Particle) |
| Thermal correction to Energy=                | 0.235540                    |
| Thermal correction to Enthalpy=              | 0.236484                    |
| Thermal correction to Gibbs Free Energy=     | 0.179032                    |
| Sum of electronic and zero-point Energies=   | -953.970491                 |
| Sum of electronic and thermal Energies=      | -953.955953                 |
| Sum of electronic and thermal Enthalpies=    | -953.955009                 |
| Sum of electronic and thermal Free Energies= | -954.012461                 |

|       | E (Thermal)<br>KCal/Mol | CV<br>Cal/Mol-Kelvin | S<br>Cal/Mol-Kelvin |
|-------|-------------------------|----------------------|---------------------|
| Total | 147.804                 | 51.806               | 120.918             |

C,0,2.6611057938,-0.504446407,-0.2890990137  
C,0,2.3465804119,0.7637420036,0.0434135187

O,0,0.4691402111,-0.6921662744,-0.2965047052  
 C,0,-0.1267230829,-0.6053463125,-1.5627972539  
 N,0,-1.0602407665,-1.1786876531,-0.6379158684  
 S,0,-2.1336365724,0.0257449314,0.0433554671  
 O,0,-3.4459190281,-0.2712747789,-0.5372175717  
 O,0,-1.5724920541,1.3808967114,-0.0496001949  
 C,0,2.9406608832,-1.6690448692,0.6178596389  
 C,0,2.0767623429,1.238237981,1.4466411905  
 C,0,2.1947668913,1.8315269616,-1.0109598555  
 C,0,-2.1010858475,-0.5008595249,1.7613496029  
 H,0,2.8412552534,-0.7066482916,-1.3464610971  
 H,0,0.2401119408,-1.3107277357,-2.3113515865  
 H,0,-0.2965109826,0.4088514919,-1.9287443491  
 H,0,2.3871591259,-2.5551940351,0.286974127  
 H,0,2.6660603593,-1.4760901991,1.6580317428  
 H,0,4.0086531104,-1.9266721952,0.5971342987  
 H,0,2.7537589264,2.0607401108,1.71526039  
 H,0,2.1894304889,0.4539370277,2.1985784503  
 H,0,1.0546715532,1.6352255267,1.5124297526  
 H,0,1.1792700899,2.250788162,-0.9954536605  
 H,0,2.4012562861,1.4519207601,-2.0175559044  
 H,0,2.8809611435,2.6687324985,-0.8214857867  
 H,0,-2.8063246977,0.1364615611,2.2993766447  
 H,0,-1.0881285273,-0.3690283891,2.1436938168  
 H,0,-2.4099909331,-1.5459058841,1.8094295736

### Grid Structure C3 fixed at 2.2 / C2 fixed at 2.5

E(RB+HF-LYP) = -954.193044592

|                                              |                             |
|----------------------------------------------|-----------------------------|
| Zero-point correction=                       | 0.221260 (Hartree/Particle) |
| Thermal correction to Energy=                | 0.236519                    |
| Thermal correction to Enthalpy=              | 0.237464                    |
| Thermal correction to Gibbs Free Energy=     | 0.178302                    |
| Sum of electronic and zero-point Energies=   | -953.971784                 |
| Sum of electronic and thermal Energies=      | -953.956525                 |
| Sum of electronic and thermal Enthalpies=    | -953.955581                 |
| Sum of electronic and thermal Free Energies= | -954.014743                 |

|       | E (Thermal)<br>KCal/Mol | CV<br>Cal/Mol-Kelvin | S<br>Cal/Mol-Kelvin |
|-------|-------------------------|----------------------|---------------------|
| Total | 148.418                 | 53.718               | 124.516             |

C,0,-2.5679578172,0.6206200147,-0.4855119709  
 C,0,-2.474802947,-0.5165323409,0.2298874187  
 O,0,-0.3711971021,0.5588664496,-0.5876443267  
 C,0,0.1857180228,-0.1431178202,-1.665231889  
 N,0,1.1615791944,0.7123010702,-1.0504677445  
 S,0,2.1414394017,-0.1541902381,0.1256692274  
 O,0,3.4687597052,-0.2355410975,-0.4887720871  
 O,0,1.4699185132,-1.367589746,0.6098542282  
 C,0,-2.6446264043,2.0361865987,0.0144223494  
 C,0,-2.2456791999,-0.576099273,1.7173247468  
 C,0,-2.5219792749,-1.8656566569,-0.4440281219  
 C,0,2.1560484126,1.0707164133,1.4409046331  
 H,0,-2.7341551438,0.5172565397,-1.5592258213  
 H,0,-0.1242869045,0.1814217113,-2.6602117962  
 H,0,0.2658045954,-1.2224263128,-1.528769354  
 H,0,-1.9680504347,2.6823957064,-0.5558439868  
 H,0,-2.3826930718,2.131144648,1.0716126719  
 H,0,-3.6604434544,2.4350504958,-0.1135135939  
 H,0,-2.9893777665,-1.2234499279,2.2014634156  
 H,0,-2.289012106,0.4018901695,2.202464794  
 H,0,-1.2595791334,-1.0160554927,1.9230105994  
 H,0,-1.5975040414,-2.4306993786,-0.2577829259

H,0,-2.6670969055,-1.7833249767,-1.5266972906  
H,0,-3.3426308334,-2.4763548591,-0.0420986437  
H,0,2.8059300533,0.6799511371,2.2270165487  
H,0,1.1364635532,1.1970174563,1.8070051727  
H,0,2.5523749887,2.0045534817,1.0400252006

### Grid Structure C3 fixed at 2.3 / C2 fixed at 1.9

E(RB+HF-LYP) = -954.180739213

|                                              |                             |
|----------------------------------------------|-----------------------------|
| Zero-point correction=                       | 0.221473 (Hartree/Particle) |
| Thermal correction to Energy=                | 0.236442                    |
| Thermal correction to Enthalpy=              | 0.237386                    |
| Thermal correction to Gibbs Free Energy=     | 0.179257                    |
| Sum of electronic and zero-point Energies=   | -953.959266                 |
| Sum of electronic and thermal Energies=      | -953.944297                 |
| Sum of electronic and thermal Enthalpies=    | -953.943353                 |
| Sum of electronic and thermal Free Energies= | -954.001483                 |

|       | E (Thermal)<br>KCal/Mol | CV<br>Cal/Mol-Kelvin | S<br>Cal/Mol-Kelvin |
|-------|-------------------------|----------------------|---------------------|
| Total | 148.370                 | 53.541               | 122.344             |

C,0,2.9282311605,-0.5413213976,-0.4213559511  
C,0,2.1311846271,0.5242399573,-0.002033115  
O,0,0.6528999587,-0.6645710873,-0.1088316703  
C,0,-0.1439889245,-0.7841462456,-1.2859729567  
N,0,-1.2385542738,-1.1240049029,-0.4534735952  
S,0,-2.179959914,0.2031139039,0.0000551372  
O,0,-3.4383799873,0.123480481,-0.759467843  
O,0,-1.4357010169,1.4803378666,-0.011382086  
C,0,3.5408495439,-1.6072644557,0.4196821286  
C,0,1.9746266957,0.8999152173,1.4518423145  
C,0,1.8320421544,1.6488915747,-0.9650071704  
C,0,-2.5295291472,-0.2244934497,1.7114950273  
H,0,3.1006565017,-0.6255463468,-1.4942377105  
H,0,0.1602006789,-1.6244609554,-1.9191560156  
H,0,-0.1991596833,0.1501016897,-1.855176014  
H,0,3.2884501938,-2.6013173108,0.0297658453  
H,0,3.233897027,-1.5574853143,1.4656725296  
H,0,4.6381998247,-1.5288660409,0.3813828674  
H,0,2.7781660943,1.5868437033,1.7482328394  
H,0,2.0002028643,0.0328644056,2.114854437  
H,0,1.0188337741,1.4130726574,1.5885203857  
H,0,0.8087343792,2.0090029903,-0.8223060083  
H,0,1.9694707762,1.3503802227,-2.009290857  
H,0,2.5132771577,2.486536953,-0.7645935416  
H,0,-3.2144986803,0.5336035117,2.0979114035  
H,0,-1.5930900503,-0.2239492119,2.2710019775  
H,0,-2.9944567346,-1.2109994155,1.7341766417

### Grid Structure C3 fixed at 2.3 / C2 fixed at 2.0

E(RB+HF-LYP) = -954.182706418

|                                            |                             |
|--------------------------------------------|-----------------------------|
| Zero-point correction=                     | 0.221574 (Hartree/Particle) |
| Thermal correction to Energy=              | 0.236581                    |
| Thermal correction to Enthalpy=            | 0.237525                    |
| Thermal correction to Gibbs Free Energy=   | 0.179293                    |
| Sum of electronic and zero-point Energies= | -953.961133                 |
| Sum of electronic and thermal Energies=    | -953.946126                 |



Sum of electronic and thermal Enthalpies= -953.945182  
 Sum of electronic and thermal Free Energies= -954.003413

|       | E (Thermal)<br>KCal/Mol | CV<br>Cal/Mol-Kelvin | S<br>Cal/Mol-Kelvin |
|-------|-------------------------|----------------------|---------------------|
| Total | 148.457                 | 53.564               | 122.559             |

C,0,2.8941506415,-0.5407106647,-0.3860790161  
 C,0,2.185212502,0.5629715653,0.0314256299  
 O,0,0.6114602154,-0.6604926981,-0.1311851483  
 C,0,-0.1075390586,-0.788877686,-1.3417893476  
 N,0,-1.1652508385,-1.1641263507,-0.468763142  
 S,0,-2.1560183103,0.1457973676,-0.0101442544  
 O,0,-3.4381798947,-0.0447392428,-0.7033932974  
 O,0,-1.4762858185,1.4508315412,-0.1160701845  
 C,0,3.4309992654,-1.6585106196,0.4465074826  
 C,0,1.9724414174,0.9177618554,1.4819219176  
 C,0,1.8945767316,1.6880430381,-0.9315763642  
 C,0,-2.3869142977,-0.2331722162,1.7321629722  
 H,0,3.0792939004,-0.6250448312,-1.4572634063  
 H,0,0.2248575238,-1.619498888,-1.9726129621  
 H,0,-0.199271099,0.1486724281,-1.8997030334  
 H,0,3.0696900228,-2.6253821009,0.0743079083  
 H,0,3.1590116809,-1.5761743651,1.5004774104  
 H,0,4.528348042,-1.6864635733,0.3795371813  
 H,0,2.7496751776,1.6194694273,1.8131391458  
 H,0,1.9960460987,0.046476131,2.1395825864  
 H,0,1.0038506798,1.4135655664,1.5968979181  
 H,0,0.8582490517,2.0248570829,-0.8245576259  
 H,0,2.0743417544,1.3998470734,-1.9724996509  
 H,0,2.5442086653,2.5443374016,-0.7048117934  
 H,0,-3.0902342609,0.5029494691,2.1279697475  
 H,0,-1.4226142943,-0.1604233115,2.2368132411  
 H,0,-2.7959233375,-1.2408893729,1.8161227919

### Grid Structure C3 fixed at 2.3 / C2 fixed at 2.1

E(RB+HF-LYP) = -954.185713273

|                                              |                             |
|----------------------------------------------|-----------------------------|
| Zero-point correction=                       | 0.221490 (Hartree/Particle) |
| Thermal correction to Energy=                | 0.236630                    |
| Thermal correction to Enthalpy=              | 0.237575                    |
| Thermal correction to Gibbs Free Energy=     | 0.178628                    |
| Sum of electronic and zero-point Energies=   | -953.964223                 |
| Sum of electronic and thermal Energies=      | -953.949083                 |
| Sum of electronic and thermal Enthalpies=    | -953.948139                 |
| Sum of electronic and thermal Free Energies= | -954.007085                 |

|       | E (Thermal)<br>KCal/Mol | CV<br>Cal/Mol-Kelvin | S<br>Cal/Mol-Kelvin |
|-------|-------------------------|----------------------|---------------------|
| Total | 148.488                 | 53.631               | 124.063             |

C,0,2.8460491535,-0.5169444572,-0.3652150818  
 C,0,2.221038862,0.6186854139,0.0517781107  
 O,0,0.5593402458,-0.6483977361,-0.1562010042  
 C,0,-0.0944535377,-0.7732694995,-1.3948974196  
 N,0,-1.1035321677,-1.1763685325,-0.4700176592  
 S,0,-2.1462211175,0.1165898066,-0.0111267235  
 O,0,-3.4324453708,-0.1655293358,-0.6599059698  
 O,0,-1.5231251394,1.4394613874,-0.184030243  
 C,0,3.3166049922,-1.6741151477,0.4600787187  
 C,0,1.9714144157,0.9673554834,1.4972279628  
 C,0,1.9399040605,1.7433409171,-0.9141578118  
 C,0,-2.2917226071,-0.2246011444,1.7474980589  
 H,0,3.0383735703,-0.605986139,-1.4353379861

H,0,0.2597002204,-1.5935855185,-2.0254979965  
H,0,-0.2217126428,0.1683176617,-1.9366111259  
H,0,2.8920608763,-2.6141873073,0.0860219408  
H,0,3.0515921354,-1.5823563268,1.5155355753  
H,0,4.4094898963,-1.7717684234,0.3939695761  
H,0,2.7173298333,1.6960977275,1.8427227716  
H,0,2.0133054633,0.1004812535,2.1600993786  
H,0,0.9865138743,1.4353194803,1.5994363397  
H,0,0.8952439771,2.065195161,-0.8360068492  
H,0,2.1496829927,1.4601358465,-1.9510843661  
H,0,2.5657011777,2.613392302,-0.67214477  
H,0,-3.0110748511,0.4917274743,2.1506298195  
H,0,-1.3125516476,-0.0944004947,2.2101257907  
H,0,-2.6525617413,-1.2462237926,1.8735156002

### Grid Structure C3 fixed at 2.3 / C2 fixed at 2.2

E(RB+HF-LYP) = -954.189182691

|                                              |                             |
|----------------------------------------------|-----------------------------|
| Zero-point correction=                       | 0.221251 (Hartree/Particle) |
| Thermal correction to Energy=                | 0.236579                    |
| Thermal correction to Enthalpy=              | 0.237523                    |
| Thermal correction to Gibbs Free Energy=     | 0.177188                    |
| Sum of electronic and zero-point Energies=   | -953.967932                 |
| Sum of electronic and thermal Energies=      | -953.952604                 |
| Sum of electronic and thermal Enthalpies=    | -953.951660                 |
| Sum of electronic and thermal Free Energies= | -954.011995                 |

|       | E (Thermal)<br>KCal/Mol | CV<br>Cal/Mol-Kelvin | S<br>Cal/Mol-Kelvin |
|-------|-------------------------|----------------------|---------------------|
| Total | 148.455                 | 53.740               | 126.985             |

C,0,2.8013673343,-0.49548213,-0.3451822445  
C,0,2.2543080051,0.6687720099,0.0692959512  
O,0,0.5124017585,-0.6511747139,-0.1826954643  
C,0,-0.089276778,-0.7585433595,-1.4455665104  
N,0,-1.0554232375,-1.1874232442,-0.4806650754  
S,0,-2.1400289059,0.0894428989,-0.0102843474  
O,0,-3.4272308241,-0.2595597224,-0.6193616295  
O,0,-1.5614618586,1.4233604604,-0.2300685822  
C,0,3.211855335,-1.6806531958,0.4769823817  
C,0,1.9814229061,1.0206746641,1.5094247643  
C,0,1.9889280007,1.7927936981,-0.9019046798  
C,0,-2.2111618834,-0.2280379481,1.7571254136  
H,0,2.9960594127,-0.5945484737,-1.4145890206  
H,0,0.2825381512,-1.5662746209,-2.0801073538  
H,0,-0.2434372161,0.1900014407,-1.965109935  
H,0,2.7319817078,-2.594897881,0.105562744  
H,0,2.95613229,-1.577136495,1.5341137479  
H,0,4.2969941441,-1.8404809759,0.4087958688  
H,0,2.7021339946,1.7723043108,1.8600268908  
H,0,2.0396373035,0.1614115969,2.1812223242  
H,0,0.9840204833,1.4663879962,1.6021829434  
H,0,0.9389391523,2.1064639986,-0.8516157427  
H,0,2.2251601137,1.5112686723,-1.9338052687  
H,0,2.597057338,2.6721011987,-0.6479029655  
H,0,-2.9351347805,0.4750076523,2.1750300943  
H,0,-1.2194832131,-0.0618443827,2.1799973702  
H,0,-2.5385038512,-1.2570383333,1.9113583408

### Grid Structure C3 fixed at 2.3 / C2 fixed at 2.3

E(RB+HF-LYP) = -954.192427254

|                                              |                             |
|----------------------------------------------|-----------------------------|
| Zero-point correction=                       | 0.221247 (Hartree/Particle) |
| Thermal correction to Energy=                | 0.236560                    |
| Thermal correction to Enthalpy=              | 0.237504                    |
| Thermal correction to Gibbs Free Energy=     | 0.177691                    |
| Sum of electronic and zero-point Energies=   | -953.971181                 |
| Sum of electronic and thermal Energies=      | -953.955868                 |
| Sum of electronic and thermal Enthalpies=    | -953.954923                 |
| Sum of electronic and thermal Free Energies= | -954.014737                 |

|       | E (Thermal)<br>KCal/Mol | CV<br>Cal/Mol-Kelvin | S<br>Cal/Mol-Kelvin |
|-------|-------------------------|----------------------|---------------------|
| Total | 148.443                 | 53.751               | 125.888             |

C,0,2.7552493249,-0.5515222101,-0.3098797807  
 C,0,2.3038956263,0.6820039967,-0.0142269185  
 O,0,0.4641897305,-0.6904144461,-0.1623758612  
 C,0,-0.1282005836,-0.8627136276,-1.4213150754  
 N,0,-1.0574485105,-1.2204270113,-0.3892136305  
 S,0,-2.1372120267,0.0978328498,0.0171507628  
 O,0,-3.4372354366,-0.3000582962,-0.5290987365  
 O,0,-1.5607570863,1.4065903249,-0.3204437325  
 C,0,3.1037146027,-1.6732356046,0.6246894197  
 C,0,2.03719737,1.1878368636,1.3799637876  
 C,0,2.0705807106,1.7069785217,-1.0970534433  
 C,0,-2.150749529,-0.0904533692,1.8044376101  
 H,0,2.9346725574,-0.7709761885,-1.3643041715  
 H,0,0.2304023422,-1.7112745104,-2.0068642482  
 H,0,-0.2914583015,0.0553181003,-1.9888358538  
 H,0,2.5591090642,-2.586414532,0.3537416124  
 H,0,2.8720903672,-1.4480146165,1.6686720391  
 H,0,4.1751070577,-1.9096355274,0.5637248756  
 H,0,2.7363884704,1.9961559406,1.6352646938  
 H,0,2.1277333402,0.4137776336,2.1454247544  
 H,0,1.027320107,1.6138795795,1.4359916319  
 H,0,1.0285521178,2.0524986564,-1.0848668935  
 H,0,2.2984931245,1.3131083237,-2.0935654057  
 H,0,2.699179147,2.5939529252,-0.9363311011  
 H,0,-2.8574693669,0.6460780447,2.1931340317  
 H,0,-1.144895753,0.1002726342,2.1811810232  
 H,0,-2.4773933491,-1.1033948031,2.0433716701

### Grid Structure C3 fixed at 2.3 / C2 fixed at 2.4

E(RB+HF-LYP) = -954.195059136

|                                              |                             |
|----------------------------------------------|-----------------------------|
| Zero-point correction=                       | 0.221481 (Hartree/Particle) |
| Thermal correction to Energy=                | 0.236555                    |
| Thermal correction to Enthalpy=              | 0.237499                    |
| Thermal correction to Gibbs Free Energy=     | 0.179249                    |
| Sum of electronic and zero-point Energies=   | -953.973578                 |
| Sum of electronic and thermal Energies=      | -953.958504                 |
| Sum of electronic and thermal Enthalpies=    | -953.957560                 |
| Sum of electronic and thermal Free Energies= | -954.015810                 |

|       | E (Thermal)<br>KCal/Mol | CV<br>Cal/Mol-Kelvin | S<br>Cal/Mol-Kelvin |
|-------|-------------------------|----------------------|---------------------|
| Total | 148.440                 | 53.635               | 122.597             |

C,0,2.7231183304,-0.5579352,-0.2791047385  
 C,0,2.3495729412,0.7108773755,-0.039041716  
 O,0,0.4294127807,-0.7174653141,-0.2202013475  
 C,0,-0.1525612782,-0.7675720154,-1.4943413576  
 N,0,-1.0633971548,-1.2126389734,-0.476901473  
 S,0,-2.1400459636,0.0751045358,0.0535848389

O,0,-3.4513087984,-0.2931991453,-0.484796047  
O,0,-1.5723853564,1.4042311506,-0.2091628053  
C,0,2.9981984504,-1.6593755773,0.7039955463  
C,0,2.0584224303,1.2795739792,1.3255006952  
C,0,2.1834543071,1.7010411849,-1.1662248152  
C,0,-2.0993059676,-0.2375081642,1.8230078923  
H,0,2.9109395966,-0.8290196437,-1.3200623375  
H,0,0.2007568293,-1.5620177956,-2.1534442667  
H,0,-0.3185676388,0.1997601891,-1.9700945075  
H,0,2.409206773,-2.5517598825,0.4592538197  
H,0,2.7638283737,-1.3814217189,1.7347889199  
H,0,4.056460306,-1.9531694324,0.6705888271  
H,0,2.7259957393,2.1245454257,1.5437903901  
H,0,2.169361627,0.550514786,2.1316948335  
H,0,1.0331160281,1.6720619511,1.3530145378  
H,0,1.1607646018,2.102023368,-1.1854413559  
H,0,2.40326087,1.256133157,-2.142997122  
H,0,2.8532297391,2.5622926312,-1.0335123743  
H,0,-2.7953302764,0.4677558713,2.282543667  
H,0,-1.0828246305,-0.0682197071,2.1807700779  
H,0,-2.4168267255,-1.2658219836,2.0005923403

### Grid Structure C3 fixed at 2.3 / C2 fixed at 2.5

E(RB+HF-LYP) = -954.196944633

|                                              |                             |
|----------------------------------------------|-----------------------------|
| Zero-point correction=                       | 0.221478 (Hartree/Particle) |
| Thermal correction to Energy=                | 0.236594                    |
| Thermal correction to Enthalpy=              | 0.237539                    |
| Thermal correction to Gibbs Free Energy=     | 0.178537                    |
| Sum of electronic and zero-point Energies=   | -953.975467                 |
| Sum of electronic and thermal Energies=      | -953.960350                 |
| Sum of electronic and thermal Enthalpies=    | -953.959406                 |
| Sum of electronic and thermal Free Energies= | -954.018407                 |

|       | E (Thermal) | CV             | S              |
|-------|-------------|----------------|----------------|
|       | KCal/Mol    | Cal/Mol-Kelvin | Cal/Mol-Kelvin |
| Total | 148.465     | 53.548         | 124.179        |

C,0,2.6918550222,-0.5438699781,-0.2595381026  
C,0,2.3960156421,0.7481455792,-0.0397719174  
O,0,0.4005555215,-0.7434181725,-0.2480328788  
C,0,-0.1716867793,-0.740249407,-1.5275035248  
N,0,-1.0735894135,-1.2221305781,-0.5168741783  
S,0,-2.1510599802,0.0514907264,0.0625118131  
O,0,-3.4654832282,-0.3083670354,-0.4729492033  
O,0,-1.5881592063,1.3875804702,-0.1708702579  
C,0,2.9358074006,-1.6362169145,0.7429706852  
C,0,2.1323735098,1.3498849465,1.3161671354  
C,0,2.2501664414,1.7201751673,-1.1851557534  
C,0,-2.0869338187,-0.3100473315,1.821909917  
H,0,2.8574872125,-0.843926773,-1.2963586461  
H,0,0.1809086243,-1.5103305367,-2.2148128279  
H,0,-0.3394636938,0.2451529816,-1.9632378298  
H,0,2.3221530798,-2.5154574577,0.5132715651  
H,0,2.7097384352,-1.334179979,1.7690406875  
H,0,3.9856821593,-1.9595454115,0.7156593816  
H,0,2.8112909188,2.1920326047,1.5086141931  
H,0,2.2458016828,0.6364904452,2.1358597394  
H,0,1.1111995919,1.7541150249,1.3513541651  
H,0,1.2365826753,2.1446692404,-1.2092867243  
H,0,2.4542951018,1.2505673278,-2.1537679041  
H,0,2.9397076133,2.5686302454,-1.0730923835

H,0,-2.7781470253,0.3808727574,2.309611736  
H,0,-1.0660266174,-0.1476919071,2.1701507464  
H,0,-2.400013385,-1.3436306074,1.9752724242

### Grid Structure C3 fixed at 2.4 / C2 fixed at 2.0

E(RB+HF-LYP) = -954.182298629

|                                              |                             |
|----------------------------------------------|-----------------------------|
| Zero-point correction=                       | 0.221289 (Hartree/Particle) |
| Thermal correction to Energy=                | 0.236455                    |
| Thermal correction to Enthalpy=              | 0.237400                    |
| Thermal correction to Gibbs Free Energy=     | 0.178485                    |
| Sum of electronic and zero-point Energies=   | -953.961009                 |
| Sum of electronic and thermal Energies=      | -953.945843                 |
| Sum of electronic and thermal Enthalpies=    | -953.944899                 |
| Sum of electronic and thermal Free Energies= | -954.003813                 |

|       | E (Thermal)<br>KCal/Mol | CV<br>Cal/Mol-Kelvin | S<br>Cal/Mol-Kelvin |
|-------|-------------------------|----------------------|---------------------|
| Total | 148.378                 | 53.700               | 123.995             |

C,0,2.9448117623,-0.5034223205,-0.3966468438  
C,0,2.1894668605,0.5417816656,0.069118244  
O,0,0.5702114092,-0.6238466737,-0.0698963838  
C,0,-0.0870766574,-0.8426690606,-1.2938951573  
N,0,-1.1348887191,-1.1699158021,-0.3830576527  
S,0,-2.1814475755,0.1477196781,-0.0528618976  
O,0,-3.4461583274,-0.1712897276,-0.7283469726  
O,0,-1.5504767936,1.457392284,-0.2894277212  
C,0,3.5151618343,-1.6442661107,0.3826437251  
C,0,2.001448431,0.8357624937,1.5396266376  
C,0,1.8598713153,1.7011840606,-0.8427494939  
C,0,-2.3983073747,-0.0725138874,1.7177688636  
H,0,3.1259810946,-0.5371096238,-1.4717186879  
H,0,0.2692890632,-1.7102940168,-1.8573960957  
H,0,-0.1930879351,0.0540270761,-1.9128135438  
H,0,3.1663653874,-2.6042136642,-0.0204128036  
H,0,3.2590397105,-1.6087378701,1.4434118428  
H,0,4.6115840781,-1.6518909591,0.2985933452  
H,0,2.7995833232,1.5015200022,1.8938362532  
H,0,2.0107669854,-0.0660547471,2.1556156327  
H,0,1.0480429628,1.3493197063,1.6960039471  
H,0,0.8138589211,2.0016558362,-0.7250702515  
H,0,2.0465293088,1.4635825505,-1.8955329896  
H,0,2.4840437625,2.5669209764,-0.582306007  
H,0,-3.1278886453,0.6722368432,2.0436273885  
H,0,-1.4371331723,0.0835998677,2.2093617897  
H,0,-2.7704599364,-1.0818543159,1.8981668788

### Grid Structure C3 fixed at 2.4 / C2 fixed at 2.1

E(RB+HF-LYP) = -954.186638158

|                                              |                             |
|----------------------------------------------|-----------------------------|
| Zero-point correction=                       | 0.221268 (Hartree/Particle) |
| Thermal correction to Energy=                | 0.236530                    |
| Thermal correction to Enthalpy=              | 0.237474                    |
| Thermal correction to Gibbs Free Energy=     | 0.177884                    |
| Sum of electronic and zero-point Energies=   | -953.965370                 |
| Sum of electronic and thermal Energies=      | -953.950108                 |
| Sum of electronic and thermal Enthalpies=    | -953.949164                 |
| Sum of electronic and thermal Free Energies= | -954.008754                 |

|  | E (Thermal)<br>KCal/Mol | CV<br>Cal/Mol-Kelvin | S<br>Cal/Mol-Kelvin |
|--|-------------------------|----------------------|---------------------|
|--|-------------------------|----------------------|---------------------|

Total 148.425 53.740 125.418

C,0,2.8990333427,-0.4738143334,-0.3821053149  
 C,0,2.2205751588,0.60226507,0.0875018093  
 O,0,0.5199651099,-0.6155253054,-0.0993368509  
 C,0,-0.0754531946,-0.8465624467,-1.3475157453  
 N,0,-1.0646793228,-1.1818748286,-0.3692795447  
 S,0,-2.1662410834,0.1200569173,-0.0507779007  
 O,0,-3.4278507893,-0.2852653137,-0.6794118263  
 O,0,-1.5861962506,1.4361689581,-0.3562684778  
 C,0,3.3990485797,-1.6608736401,0.3833418593  
 C,0,1.9836665453,0.8793227525,1.5529556271  
 C,0,1.8978661951,1.7644744337,-0.8222456299  
 C,0,-2.3113260789,-0.0511603322,1.7323433802  
 H,0,3.0941462331,-0.5035110359,-1.455483331  
 H,0,0.3024393303,-1.7109137896,-1.8988548906  
 H,0,-0.2197776194,0.0468510673,-1.9607376822  
 H,0,2.9970563552,-2.5929629554,-0.0354320358  
 H,0,3.1333887978,-1.6289336081,1.4423601779  
 H,0,4.4937084797,-1.7324216025,0.3133308728  
 H,0,2.7418311346,1.5784925169,1.931040284  
 H,0,2.0179482128,-0.0215745602,2.1696714742  
 H,0,1.0069706319,1.3551413461,1.6920529102  
 H,0,0.8416273838,2.0437156226,-0.7385452373  
 H,0,2.1223124601,1.5401505592,-1.8707290722  
 H,0,2.489863007,2.6452636061,-0.537018995  
 H,0,-3.0566132881,0.6772949005,2.0594157546  
 H,0,-1.3404740972,0.1575286226,2.1839641322  
 H,0,-2.6396222772,-1.0668432998,1.9568501876

### Grid Structure C3 fixed at 2.4 / C2 fixed at 2.2

E(RB+HF-LYP) = -954.191116605

|                                              |                             |
|----------------------------------------------|-----------------------------|
| Zero-point correction=                       | 0.221126 (Hartree/Particle) |
| Thermal correction to Energy=                | 0.236471                    |
| Thermal correction to Enthalpy=              | 0.237415                    |
| Thermal correction to Gibbs Free Energy=     | 0.176874                    |
| Sum of electronic and zero-point Energies=   | -953.969991                 |
| Sum of electronic and thermal Energies=      | -953.954646                 |
| Sum of electronic and thermal Enthalpies=    | -953.953701                 |
| Sum of electronic and thermal Free Energies= | -954.014243                 |

|       | E (Thermal)<br>KCal/Mol | CV<br>Cal/Mol-Kelvin | S<br>Cal/Mol-Kelvin |
|-------|-------------------------|----------------------|---------------------|
| Total | 148.388                 | 53.815               | 127.420             |

C,0,2.8629856219,-0.4563857665,-0.368673527  
 C,0,2.2576024437,0.6533214262,0.0990903954  
 O,0,0.4819035214,-0.6267308185,-0.120808404  
 C,0,-0.072820203,-0.8406235659,-1.3893058599  
 N,0,-1.0255152819,-1.1928260991,-0.3762987686  
 S,0,-2.1607847131,0.0974363064,-0.0465490735  
 O,0,-3.4184846369,-0.3478120793,-0.6523776554  
 O,0,-1.6081787493,1.4185071,-0.374534233  
 C,0,3.3065608567,-1.6701164488,0.3935297577  
 C,0,1.991785121,0.933249325,1.5578890516  
 C,0,1.9472344348,1.8124360752,-0.8179475063  
 C,0,-2.2634653978,-0.0664818985,1.7402364861  
 H,0,3.0585887892,-0.4966727174,-1.4421042015  
 H,0,0.3181691586,-1.6945052608,-1.9455149123  
 H,0,-0.2377487828,0.0609708845,-1.9828109825

H,0,2.839936396,-2.5780045361,-0.0114680418  
H,0,3.0626094953,-1.619788528,1.4573743315  
H,0,4.3932088135,-1.808640803,0.3056502764  
H,0,2.7141950186,1.667038758,1.9411368717  
H,0,2.0537940787,0.0416420085,2.1859427211  
H,0,0.9952675097,1.3732237,1.6818565478  
H,0,0.8853217769,2.0809687415,-0.7607510877  
H,0,2.1977295522,1.5896909775,-1.8609611256  
H,0,2.5188835274,2.7030705734,-0.5214433524  
H,0,-3.0118594511,0.6532481785,2.0793115118  
H,0,-1.2860178047,0.1600117386,2.1686289993  
H,0,-2.5721340391,-1.0855604212,1.9768785534

### Grid Structure C3 fixed at 2.4 / C2 fixed at 2.3

E(RB+HF-LYP) = -954.194937885

|                                              |                             |
|----------------------------------------------|-----------------------------|
| Zero-point correction=                       | 0.221438 (Hartree/Particle) |
| Thermal correction to Energy=                | 0.236555                    |
| Thermal correction to Enthalpy=              | 0.237499                    |
| Thermal correction to Gibbs Free Energy=     | 0.179028                    |
| Sum of electronic and zero-point Energies=   | -953.973500                 |
| Sum of electronic and thermal Energies=      | -953.958383                 |
| Sum of electronic and thermal Enthalpies=    | -953.957439                 |
| Sum of electronic and thermal Free Energies= | -954.015910                 |

|       | E (Thermal)<br>KCal/Mol | CV<br>Cal/Mol-Kelvin | S<br>Cal/Mol-Kelvin |
|-------|-------------------------|----------------------|---------------------|
| Total | 148.440                 | 53.667               | 123.063             |

C,0,2.8349292395,-0.469668457,-0.3373756205  
C,0,2.2966285519,0.6861239397,0.0885172935  
O,0,0.4475770194,-0.6558181476,-0.1764260128  
C,0,-0.092836046,-0.7674721639,-1.4643010275  
N,0,-1.0238975727,-1.1910100347,-0.4555863975  
S,0,-2.1574855989,0.0821438241,-0.0201066959  
O,0,-3.4273914411,-0.3299888423,-0.6220698265  
O,0,-1.606347454,1.4178148341,-0.2832043847  
C,0,3.2136027096,-1.6798963975,0.4659258394  
C,0,1.9996185629,1.0179578274,1.5294209877  
C,0,2.0260770435,1.8194262061,-0.8718517835  
C,0,-2.2104631627,-0.1896048095,1.7556672476  
H,0,3.0386946137,-0.5558376652,-1.4068523025  
H,0,0.2961584141,-1.578707084,-2.0811444984  
H,0,-0.2637981461,0.1776582559,-1.9817925546  
H,0,2.6836971489,-2.5702689611,0.1024166271  
H,0,2.98865248,-1.5747735683,1.530220146  
H,0,4.2880370253,-1.8894463242,0.3711195127  
H,0,2.6871481132,1.7945072712,1.892629677  
H,0,2.0847619688,0.1576946293,2.1973869489  
H,0,0.9856270096,1.4269283995,1.6207490898  
H,0,0.9689531905,2.1132287334,-0.838555252  
H,0,2.2845594196,1.5552062109,-1.9032476105  
H,0,2.6099397232,2.7098612477,-0.5994597852  
H,0,-2.9411390907,0.5146095576,2.1596974483  
H,0,-1.2182007743,0.0034838539,2.165888355  
H,0,-2.5220848896,-1.2186351248,1.9393402863

### Grid Structure C3 fixed at 2.4 / C2 fixed at 2.4

E(RB+HF-LYP) = -954.197917260

|                               |                             |
|-------------------------------|-----------------------------|
| Zero-point correction=        | 0.221623 (Hartree/Particle) |
| Thermal correction to Energy= | 0.236667                    |

Thermal correction to Enthalpy= 0.237611  
 Thermal correction to Gibbs Free Energy= 0.179288  
 Sum of electronic and zero-point Energies= -953.976294  
 Sum of electronic and thermal Energies= -953.961251  
 Sum of electronic and thermal Enthalpies= -953.960307  
 Sum of electronic and thermal Free Energies= -954.018629

|       | E (Thermal) | CV             | S              |
|-------|-------------|----------------|----------------|
|       | KCal/Mol    | Cal/Mol-Kelvin | Cal/Mol-Kelvin |
| Total | 148.510     | 53.507         | 122.751        |

C,0,2.806906593,-0.4674649797,-0.3186771719  
 C,0,2.3344965819,0.7229525543,0.0843427934  
 O,0,0.419494517,-0.6916192433,-0.2185602587  
 C,0,-0.11701333,-0.7397260384,-1.5118548199  
 N,0,-1.0342873964,-1.2002448702,-0.5046004053  
 S,0,-2.155955073,0.067126153,-0.0023924894  
 O,0,-3.4364385317,-0.3153958509,-0.600552019  
 O,0,-1.5966172159,1.4065518514,-0.2240786967  
 C,0,3.1376025521,-1.6768654092,0.5078306511  
 C,0,2.0221649748,1.0871336316,1.5134275517  
 C,0,2.0996692881,1.8425048362,-0.9010338288  
 C,0,-2.179964122,-0.2728183289,1.7623995943  
 H,0,3.0108531691,-0.5831185087,-1.3855005475  
 H,0,0.2636104108,-1.5266736159,-2.1637694291  
 H,0,-0.288118838,0.2281319168,-1.9843235585  
 H,0,2.5774915346,-2.5530177865,0.1562753627  
 H,0,2.9106317222,-1.5457334544,1.5689655753  
 H,0,4.2045654109,-1.9256337603,0.4237111595  
 H,0,2.6808255256,1.8964500274,1.8581473281  
 H,0,2.1314468412,0.2500749093,2.2069400302  
 H,0,0.9941736009,1.4654008719,1.5882689935  
 H,0,1.0484252733,2.1602231053,-0.8849781526  
 H,0,2.361460237,1.5517570474,-1.9244096093  
 H,0,2.6984285045,2.7268699851,-0.6414866998  
 H,0,-2.8971789982,0.4211724449,2.2062332094  
 H,0,-1.1788454896,-0.1030982466,2.1614372486  
 H,0,-2.4971613445,-1.3057009469,1.9118909326

## Interpolated Grid of Non-Stationary Point Structures

\*The predicted KIEs were calculated from the non-stationary point structures listed above. From the predicted KIEs and C-O bond distances a grid was used to calculate 2800 geometries and predicted KIEs.

### Predicted KIE at C3

|                        | C2 C-O Bond Distance→ |        |        |        |        |        |        |        |        |
|------------------------|-----------------------|--------|--------|--------|--------|--------|--------|--------|--------|
| C3 C-O Bond Distance ↓ | 1.90                  | 1.91   | 1.92   | 1.93   | 1.94   | 1.95   | 1.96   | 1.97   | 1.98   |
| 1.90                   | 1.0225                | 1.0226 | 1.0227 | 1.0228 | 1.0228 | 1.0229 | 1.0230 | 1.0231 | 1.0232 |
| 1.91                   | 1.0222                | 1.0222 | 1.0223 | 1.0224 | 1.0224 | 1.0225 | 1.0226 | 1.0226 | 1.0227 |
| 1.92                   | 1.0218                | 1.0218 | 1.0219 | 1.0219 | 1.0220 | 1.0221 | 1.0221 | 1.0222 | 1.0222 |
| 1.93                   | 1.0214                | 1.0215 | 1.0215 | 1.0215 | 1.0216 | 1.0216 | 1.0217 | 1.0217 | 1.0217 |
| 1.94                   | 1.0211                | 1.0211 | 1.0211 | 1.0211 | 1.0212 | 1.0212 | 1.0212 | 1.0212 | 1.0213 |
| 1.95                   | 1.0207                | 1.0207 | 1.0207 | 1.0207 | 1.0207 | 1.0207 | 1.0208 | 1.0208 | 1.0208 |
| 1.96                   | 1.0203                | 1.0203 | 1.0203 | 1.0203 | 1.0203 | 1.0203 | 1.0203 | 1.0203 | 1.0203 |
| 1.97                   | 1.0199                | 1.0199 | 1.0199 | 1.0199 | 1.0199 | 1.0199 | 1.0199 | 1.0198 | 1.0198 |
| 1.98                   | 1.0196                | 1.0195 | 1.0195 | 1.0195 | 1.0195 | 1.0194 | 1.0194 | 1.0194 | 1.0194 |
| 1.99                   | 1.0192                | 1.0192 | 1.0191 | 1.0191 | 1.0190 | 1.0190 | 1.0190 | 1.0189 | 1.0189 |



|      |        |        |        |        |        |        |        |        |        |
|------|--------|--------|--------|--------|--------|--------|--------|--------|--------|
| 2.00 | 1.0188 | 1.0188 | 1.0187 | 1.0187 | 1.0186 | 1.0186 | 1.0185 | 1.0185 | 1.0184 |
| 2.01 | 1.0184 | 1.0183 | 1.0183 | 1.0182 | 1.0182 | 1.0181 | 1.0181 | 1.0180 | 1.0179 |
| 2.02 | 1.0180 | 1.0179 | 1.0179 | 1.0178 | 1.0177 | 1.0177 | 1.0176 | 1.0175 | 1.0175 |
| 2.03 | 1.0176 | 1.0175 | 1.0174 | 1.0174 | 1.0173 | 1.0172 | 1.0171 | 1.0171 | 1.0170 |
| 2.04 | 1.0172 | 1.0171 | 1.0170 | 1.0169 | 1.0168 | 1.0168 | 1.0167 | 1.0166 | 1.0165 |
| 2.05 | 1.0167 | 1.0167 | 1.0166 | 1.0165 | 1.0164 | 1.0163 | 1.0162 | 1.0161 | 1.0160 |
| 2.06 | 1.0163 | 1.0162 | 1.0161 | 1.0160 | 1.0159 | 1.0158 | 1.0157 | 1.0157 | 1.0156 |
| 2.07 | 1.0159 | 1.0158 | 1.0157 | 1.0156 | 1.0155 | 1.0154 | 1.0153 | 1.0152 | 1.0151 |
| 2.08 | 1.0155 | 1.0154 | 1.0153 | 1.0152 | 1.0151 | 1.0149 | 1.0148 | 1.0147 | 1.0146 |
| 2.09 | 1.0151 | 1.0150 | 1.0148 | 1.0147 | 1.0146 | 1.0145 | 1.0144 | 1.0142 | 1.0141 |
| 2.10 | 1.0147 | 1.0145 | 1.0144 | 1.0143 | 1.0142 | 1.0140 | 1.0139 | 1.0138 | 1.0137 |
| 2.11 | 1.0143 | 1.0142 | 1.0141 | 1.0139 | 1.0138 | 1.0137 | 1.0135 | 1.0134 | 1.0133 |
| 2.12 | 1.0140 | 1.0139 | 1.0137 | 1.0136 | 1.0134 | 1.0133 | 1.0132 | 1.0130 | 1.0129 |
| 2.13 | 1.0137 | 1.0135 | 1.0134 | 1.0132 | 1.0131 | 1.0129 | 1.0128 | 1.0126 | 1.0125 |
| 2.14 | 1.0133 | 1.0132 | 1.0130 | 1.0129 | 1.0127 | 1.0126 | 1.0124 | 1.0123 | 1.0121 |
| 2.15 | 1.0130 | 1.0128 | 1.0127 | 1.0125 | 1.0124 | 1.0122 | 1.0120 | 1.0119 | 1.0117 |
| 2.16 | 1.0127 | 1.0125 | 1.0123 | 1.0122 | 1.0120 | 1.0118 | 1.0117 | 1.0115 | 1.0113 |
| 2.17 | 1.0123 | 1.0122 | 1.0120 | 1.0118 | 1.0116 | 1.0115 | 1.0113 | 1.0111 | 1.0110 |
| 2.18 | 1.0120 | 1.0118 | 1.0116 | 1.0115 | 1.0113 | 1.0111 | 1.0109 | 1.0108 | 1.0106 |
| 2.19 | 1.0117 | 1.0115 | 1.0113 | 1.0111 | 1.0109 | 1.0107 | 1.0106 | 1.0104 | 1.0102 |
| 2.20 | 1.0113 | 1.0111 | 1.0110 | 1.0108 | 1.0106 | 1.0104 | 1.0102 | 1.0100 | 1.0098 |
| 2.21 | 1.0111 | 1.0109 | 1.0107 | 1.0105 | 1.0103 | 1.0101 | 1.0099 | 1.0097 | 1.0095 |
| 2.22 | 1.0109 | 1.0107 | 1.0105 | 1.0103 | 1.0101 | 1.0099 | 1.0097 | 1.0095 | 1.0093 |
| 2.23 | 1.0107 | 1.0105 | 1.0103 | 1.0101 | 1.0098 | 1.0096 | 1.0094 | 1.0092 | 1.0090 |
| 2.24 | 1.0105 | 1.0102 | 1.0100 | 1.0098 | 1.0096 | 1.0094 | 1.0092 | 1.0090 | 1.0088 |
| 2.25 | 1.0102 | 1.0100 | 1.0098 | 1.0096 | 1.0094 | 1.0091 | 1.0089 | 1.0087 | 1.0085 |
| 2.26 | 1.0100 | 1.0098 | 1.0096 | 1.0093 | 1.0091 | 1.0089 | 1.0087 | 1.0085 | 1.0082 |
| 2.27 | 1.0098 | 1.0096 | 1.0093 | 1.0091 | 1.0089 | 1.0087 | 1.0084 | 1.0082 | 1.0080 |
| 2.28 | 1.0096 | 1.0093 | 1.0091 | 1.0089 | 1.0086 | 1.0084 | 1.0082 | 1.0079 | 1.0077 |
| 2.29 | 1.0094 | 1.0091 | 1.0089 | 1.0086 | 1.0084 | 1.0082 | 1.0079 | 1.0077 | 1.0074 |
| 2.30 | 1.0091 | 1.0089 | 1.0086 | 1.0084 | 1.0082 | 1.0079 | 1.0077 | 1.0074 | 1.0072 |

| C3 C-O<br>Bond<br>Distance<br>↓ | C2 C-O<br>Bond<br>Distance → |        |        |        |        |        |        |        |        |  |
|---------------------------------|------------------------------|--------|--------|--------|--------|--------|--------|--------|--------|--|
|                                 | 1.99                         | 2.00   | 2.01   | 2.02   | 2.03   | 2.04   | 2.05   | 2.06   | 2.07   |  |
| 1.90                            | 1.0232                       | 1.0233 | 1.0234 | 1.0236 | 1.0237 | 1.0239 | 1.0240 | 1.0241 | 1.0243 |  |
| 1.91                            | 1.0227                       | 1.0228 | 1.0229 | 1.0231 | 1.0232 | 1.0233 | 1.0234 | 1.0235 | 1.0237 |  |
| 1.92                            | 1.0223                       | 1.0223 | 1.0224 | 1.0225 | 1.0226 | 1.0227 | 1.0229 | 1.0230 | 1.0231 |  |
| 1.93                            | 1.0218                       | 1.0218 | 1.0219 | 1.0220 | 1.0221 | 1.0222 | 1.0223 | 1.0224 | 1.0225 |  |
| 1.94                            | 1.0213                       | 1.0213 | 1.0214 | 1.0215 | 1.0216 | 1.0216 | 1.0217 | 1.0218 | 1.0219 |  |
| 1.95                            | 1.0208                       | 1.0208 | 1.0209 | 1.0209 | 1.0210 | 1.0211 | 1.0212 | 1.0212 | 1.0213 |  |
| 1.96                            | 1.0203                       | 1.0203 | 1.0204 | 1.0204 | 1.0205 | 1.0205 | 1.0206 | 1.0206 | 1.0207 |  |
| 1.97                            | 1.0198                       | 1.0198 | 1.0198 | 1.0199 | 1.0199 | 1.0200 | 1.0200 | 1.0201 | 1.0201 |  |
| 1.98                            | 1.0193                       | 1.0193 | 1.0193 | 1.0194 | 1.0194 | 1.0194 | 1.0195 | 1.0195 | 1.0195 |  |
| 1.99                            | 1.0188                       | 1.0188 | 1.0188 | 1.0188 | 1.0189 | 1.0189 | 1.0189 | 1.0189 | 1.0189 |  |
| 2.00                            | 1.0184                       | 1.0183 | 1.0183 | 1.0183 | 1.0183 | 1.0183 | 1.0183 | 1.0183 | 1.0183 |  |
| 2.01                            | 1.0179                       | 1.0178 | 1.0178 | 1.0178 | 1.0178 | 1.0178 | 1.0178 | 1.0178 | 1.0178 |  |
| 2.02                            | 1.0174                       | 1.0173 | 1.0173 | 1.0173 | 1.0173 | 1.0173 | 1.0172 | 1.0172 | 1.0172 |  |
| 2.03                            | 1.0169                       | 1.0168 | 1.0168 | 1.0168 | 1.0168 | 1.0167 | 1.0167 | 1.0167 | 1.0166 |  |
| 2.04                            | 1.0164                       | 1.0163 | 1.0163 | 1.0163 | 1.0162 | 1.0162 | 1.0162 | 1.0161 | 1.0161 |  |
| 2.05                            | 1.0159                       | 1.0159 | 1.0158 | 1.0158 | 1.0157 | 1.0157 | 1.0156 | 1.0156 | 1.0155 |  |
| 2.06                            | 1.0155                       | 1.0154 | 1.0153 | 1.0152 | 1.0152 | 1.0151 | 1.0151 | 1.0150 | 1.0150 |  |
| 2.07                            | 1.0150                       | 1.0149 | 1.0148 | 1.0147 | 1.0147 | 1.0146 | 1.0145 | 1.0145 | 1.0144 |  |
| 2.08                            | 1.0145                       | 1.0144 | 1.0143 | 1.0142 | 1.0141 | 1.0141 | 1.0140 | 1.0139 | 1.0138 |  |
| 2.09                            | 1.0140                       | 1.0139 | 1.0138 | 1.0137 | 1.0136 | 1.0135 | 1.0135 | 1.0134 | 1.0133 |  |
| 2.10                            | 1.0135                       | 1.0134 | 1.0133 | 1.0132 | 1.0131 | 1.0130 | 1.0129 | 1.0128 | 1.0127 |  |
| 2.11                            | 1.0131                       | 1.0130 | 1.0129 | 1.0128 | 1.0127 | 1.0126 | 1.0125 | 1.0124 | 1.0123 |  |
| 2.12                            | 1.0127                       | 1.0126 | 1.0125 | 1.0124 | 1.0123 | 1.0122 | 1.0120 | 1.0119 | 1.0118 |  |

|             |        |        |        |        |        |        |        |        |        |
|-------------|--------|--------|--------|--------|--------|--------|--------|--------|--------|
| <b>2.13</b> | 1.0124 | 1.0122 | 1.0121 | 1.0120 | 1.0118 | 1.0117 | 1.0116 | 1.0115 | 1.0114 |
| <b>2.14</b> | 1.0120 | 1.0118 | 1.0117 | 1.0116 | 1.0114 | 1.0113 | 1.0112 | 1.0110 | 1.0109 |
| <b>2.15</b> | 1.0116 | 1.0114 | 1.0113 | 1.0111 | 1.0110 | 1.0109 | 1.0107 | 1.0106 | 1.0105 |
| <b>2.16</b> | 1.0112 | 1.0110 | 1.0109 | 1.0107 | 1.0106 | 1.0104 | 1.0103 | 1.0102 | 1.0100 |
| <b>2.17</b> | 1.0108 | 1.0106 | 1.0105 | 1.0103 | 1.0102 | 1.0100 | 1.0099 | 1.0097 | 1.0096 |
| <b>2.18</b> | 1.0104 | 1.0102 | 1.0101 | 1.0099 | 1.0097 | 1.0096 | 1.0094 | 1.0093 | 1.0091 |
| <b>2.19</b> | 1.0100 | 1.0098 | 1.0097 | 1.0095 | 1.0093 | 1.0092 | 1.0090 | 1.0088 | 1.0087 |
| <b>2.20</b> | 1.0096 | 1.0094 | 1.0092 | 1.0091 | 1.0089 | 1.0087 | 1.0086 | 1.0084 | 1.0082 |
| <b>2.21</b> | 1.0093 | 1.0091 | 1.0090 | 1.0088 | 1.0086 | 1.0084 | 1.0083 | 1.0081 | 1.0079 |
| <b>2.22</b> | 1.0091 | 1.0089 | 1.0087 | 1.0085 | 1.0083 | 1.0082 | 1.0080 | 1.0078 | 1.0076 |
| <b>2.23</b> | 1.0088 | 1.0086 | 1.0084 | 1.0082 | 1.0080 | 1.0079 | 1.0077 | 1.0075 | 1.0073 |
| <b>2.24</b> | 1.0085 | 1.0083 | 1.0081 | 1.0080 | 1.0078 | 1.0076 | 1.0074 | 1.0072 | 1.0070 |
| <b>2.25</b> | 1.0083 | 1.0081 | 1.0079 | 1.0077 | 1.0075 | 1.0073 | 1.0071 | 1.0069 | 1.0067 |
| <b>2.26</b> | 1.0080 | 1.0078 | 1.0076 | 1.0074 | 1.0072 | 1.0070 | 1.0068 | 1.0066 | 1.0064 |
| <b>2.27</b> | 1.0077 | 1.0075 | 1.0073 | 1.0071 | 1.0069 | 1.0067 | 1.0065 | 1.0063 | 1.0061 |
| <b>2.28</b> | 1.0075 | 1.0072 | 1.0070 | 1.0068 | 1.0066 | 1.0064 | 1.0062 | 1.0060 | 1.0058 |
| <b>2.29</b> | 1.0072 | 1.0070 | 1.0068 | 1.0065 | 1.0063 | 1.0061 | 1.0059 | 1.0057 | 1.0055 |
| <b>2.30</b> | 1.0069 | 1.0067 | 1.0065 | 1.0063 | 1.0061 | 1.0058 | 1.0056 | 1.0054 | 1.0052 |
| <b>2.31</b> |        | 1.0065 | 1.0063 | 1.0061 | 1.0059 | 1.0057 | 1.0055 | 1.0053 | 1.0050 |
| <b>2.32</b> |        | 1.0063 | 1.0061 | 1.0059 | 1.0057 | 1.0055 | 1.0053 | 1.0051 | 1.0049 |
| <b>2.33</b> |        | 1.0062 | 1.0060 | 1.0058 | 1.0056 | 1.0053 | 1.0051 | 1.0049 | 1.0047 |
| <b>2.34</b> |        | 1.0060 | 1.0058 | 1.0056 | 1.0054 | 1.0052 | 1.0050 | 1.0048 | 1.0046 |
| <b>2.35</b> |        | 1.0058 | 1.0056 | 1.0054 | 1.0052 | 1.0050 | 1.0048 | 1.0046 | 1.0044 |
| <b>2.36</b> |        | 1.0057 | 1.0055 | 1.0053 | 1.0051 | 1.0049 | 1.0046 | 1.0044 | 1.0042 |
| <b>2.37</b> |        | 1.0055 | 1.0053 | 1.0051 | 1.0049 | 1.0047 | 1.0045 | 1.0043 | 1.0041 |
| <b>2.38</b> |        | 1.0053 | 1.0051 | 1.0049 | 1.0047 | 1.0045 | 1.0043 | 1.0041 | 1.0039 |
| <b>2.39</b> |        | 1.0052 | 1.0050 | 1.0048 | 1.0046 | 1.0044 | 1.0042 | 1.0040 | 1.0038 |
| <b>2.40</b> |        | 1.0050 | 1.0048 | 1.0046 | 1.0044 | 1.0042 | 1.0040 | 1.0038 | 1.0036 |

|                               | <b>C2 C-O Bond Distance →</b> |             |             |             |             |             |             |             |             |  |
|-------------------------------|-------------------------------|-------------|-------------|-------------|-------------|-------------|-------------|-------------|-------------|--|
| <b>C3 C-O Bond Distance ↓</b> | <b>2.08</b>                   | <b>2.09</b> | <b>2.10</b> | <b>2.11</b> | <b>2.12</b> | <b>2.13</b> | <b>2.14</b> | <b>2.15</b> | <b>2.16</b> |  |
| <b>1.90</b>                   | 1.0244                        | 1.0245      | 1.0247      | 1.0248      | 1.0248      | 1.0249      | 1.0250      | 1.0251      | 1.0252      |  |
| <b>1.91</b>                   | 1.0238                        | 1.0239      | 1.0240      | 1.0241      | 1.0242      | 1.0242      | 1.0243      | 1.0244      | 1.0245      |  |
| <b>1.92</b>                   | 1.0232                        | 1.0233      | 1.0234      | 1.0235      | 1.0235      | 1.0236      | 1.0236      | 1.0237      | 1.0238      |  |
| <b>1.93</b>                   | 1.0226                        | 1.0227      | 1.0228      | 1.0228      | 1.0229      | 1.0229      | 1.0229      | 1.0230      | 1.0230      |  |
| <b>1.94</b>                   | 1.0220                        | 1.0220      | 1.0221      | 1.0222      | 1.0222      | 1.0222      | 1.0223      | 1.0223      | 1.0223      |  |
| <b>1.95</b>                   | 1.0214                        | 1.0214      | 1.0215      | 1.0215      | 1.0215      | 1.0216      | 1.0216      | 1.0216      | 1.0216      |  |
| <b>1.96</b>                   | 1.0208                        | 1.0208      | 1.0209      | 1.0209      | 1.0209      | 1.0209      | 1.0209      | 1.0209      | 1.0209      |  |
| <b>1.97</b>                   | 1.0201                        | 1.0202      | 1.0202      | 1.0202      | 1.0202      | 1.0202      | 1.0202      | 1.0202      | 1.0202      |  |
| <b>1.98</b>                   | 1.0195                        | 1.0196      | 1.0196      | 1.0196      | 1.0195      | 1.0195      | 1.0195      | 1.0195      | 1.0195      |  |
| <b>1.99</b>                   | 1.0189                        | 1.0189      | 1.0190      | 1.0189      | 1.0189      | 1.0189      | 1.0188      | 1.0188      | 1.0187      |  |
| <b>2.00</b>                   | 1.0183                        | 1.0183      | 1.0183      | 1.0183      | 1.0182      | 1.0182      | 1.0181      | 1.0181      | 1.0180      |  |
| <b>2.01</b>                   | 1.0178                        | 1.0177      | 1.0177      | 1.0177      | 1.0176      | 1.0176      | 1.0175      | 1.0174      | 1.0174      |  |
| <b>2.02</b>                   | 1.0172                        | 1.0172      | 1.0171      | 1.0171      | 1.0170      | 1.0169      | 1.0169      | 1.0168      | 1.0167      |  |
| <b>2.03</b>                   | 1.0166                        | 1.0166      | 1.0166      | 1.0165      | 1.0164      | 1.0163      | 1.0162      | 1.0162      | 1.0161      |  |
| <b>2.04</b>                   | 1.0160                        | 1.0160      | 1.0160      | 1.0159      | 1.0158      | 1.0157      | 1.0156      | 1.0155      | 1.0154      |  |
| <b>2.05</b>                   | 1.0155                        | 1.0154      | 1.0154      | 1.0153      | 1.0152      | 1.0151      | 1.0150      | 1.0149      | 1.0148      |  |
| <b>2.06</b>                   | 1.0149                        | 1.0148      | 1.0148      | 1.0147      | 1.0146      | 1.0145      | 1.0143      | 1.0142      | 1.0141      |  |
| <b>2.07</b>                   | 1.0143                        | 1.0143      | 1.0142      | 1.0141      | 1.0140      | 1.0138      | 1.0137      | 1.0136      | 1.0135      |  |
| <b>2.08</b>                   | 1.0138                        | 1.0137      | 1.0136      | 1.0135      | 1.0133      | 1.0132      | 1.0131      | 1.0130      | 1.0128      |  |
| <b>2.09</b>                   | 1.0132                        | 1.0131      | 1.0130      | 1.0129      | 1.0127      | 1.0126      | 1.0125      | 1.0123      | 1.0122      |  |
| <b>2.10</b>                   | 1.0126                        | 1.0125      | 1.0124      | 1.0123      | 1.0121      | 1.0120      | 1.0118      | 1.0117      | 1.0115      |  |
| <b>2.11</b>                   | 1.0122                        | 1.0121      | 1.0119      | 1.0118      | 1.0116      | 1.0115      | 1.0113      | 1.0112      | 1.0110      |  |
| <b>2.12</b>                   | 1.0117                        | 1.0116      | 1.0115      | 1.0113      | 1.0112      | 1.0110      | 1.0109      | 1.0107      | 1.0106      |  |
| <b>2.13</b>                   | 1.0112                        | 1.0111      | 1.0110      | 1.0108      | 1.0107      | 1.0105      | 1.0104      | 1.0102      | 1.0101      |  |
| <b>2.14</b>                   | 1.0108                        | 1.0107      | 1.0105      | 1.0104      | 1.0102      | 1.0101      | 1.0099      | 1.0098      | 1.0096      |  |
| <b>2.15</b>                   | 1.0103                        | 1.0102      | 1.0101      | 1.0099      | 1.0097      | 1.0096      | 1.0094      | 1.0093      | 1.0091      |  |

|             |        |        |        |        |        |        |        |        |        |
|-------------|--------|--------|--------|--------|--------|--------|--------|--------|--------|
| <b>2.16</b> | 1.0099 | 1.0097 | 1.0096 | 1.0094 | 1.0093 | 1.0091 | 1.0090 | 1.0088 | 1.0086 |
| <b>2.17</b> | 1.0094 | 1.0093 | 1.0091 | 1.0090 | 1.0088 | 1.0086 | 1.0085 | 1.0083 | 1.0082 |
| <b>2.18</b> | 1.0090 | 1.0088 | 1.0086 | 1.0085 | 1.0083 | 1.0082 | 1.0080 | 1.0078 | 1.0077 |
| <b>2.19</b> | 1.0085 | 1.0083 | 1.0082 | 1.0080 | 1.0078 | 1.0077 | 1.0075 | 1.0074 | 1.0072 |
| <b>2.20</b> | 1.0080 | 1.0079 | 1.0077 | 1.0075 | 1.0074 | 1.0072 | 1.0070 | 1.0069 | 1.0067 |
| <b>2.21</b> | 1.0077 | 1.0076 | 1.0074 | 1.0072 | 1.0071 | 1.0069 | 1.0067 | 1.0066 | 1.0064 |
| <b>2.22</b> | 1.0074 | 1.0072 | 1.0071 | 1.0069 | 1.0068 | 1.0066 | 1.0065 | 1.0063 | 1.0062 |
| <b>2.23</b> | 1.0071 | 1.0069 | 1.0068 | 1.0066 | 1.0065 | 1.0063 | 1.0062 | 1.0060 | 1.0059 |
| <b>2.24</b> | 1.0068 | 1.0066 | 1.0064 | 1.0063 | 1.0062 | 1.0060 | 1.0059 | 1.0058 | 1.0056 |
| <b>2.25</b> | 1.0065 | 1.0063 | 1.0061 | 1.0060 | 1.0059 | 1.0057 | 1.0056 | 1.0055 | 1.0053 |
| <b>2.26</b> | 1.0062 | 1.0060 | 1.0058 | 1.0057 | 1.0056 | 1.0054 | 1.0053 | 1.0052 | 1.0051 |
| <b>2.27</b> | 1.0059 | 1.0057 | 1.0055 | 1.0054 | 1.0053 | 1.0051 | 1.0050 | 1.0049 | 1.0048 |
| <b>2.28</b> | 1.0056 | 1.0054 | 1.0052 | 1.0051 | 1.0050 | 1.0049 | 1.0047 | 1.0046 | 1.0045 |
| <b>2.29</b> | 1.0053 | 1.0051 | 1.0049 | 1.0048 | 1.0047 | 1.0046 | 1.0045 | 1.0044 | 1.0042 |
| <b>2.30</b> | 1.0050 | 1.0048 | 1.0046 | 1.0045 | 1.0044 | 1.0043 | 1.0042 | 1.0041 | 1.0040 |
| <b>2.31</b> | 1.0048 | 1.0046 | 1.0044 | 1.0043 | 1.0042 | 1.0041 | 1.0040 | 1.0039 | 1.0038 |
| <b>2.32</b> | 1.0047 | 1.0045 | 1.0043 | 1.0042 | 1.0041 | 1.0040 | 1.0039 | 1.0038 | 1.0037 |
| <b>2.33</b> | 1.0045 | 1.0043 | 1.0041 | 1.0040 | 1.0039 | 1.0038 | 1.0037 | 1.0036 | 1.0035 |
| <b>2.34</b> | 1.0044 | 1.0041 | 1.0039 | 1.0038 | 1.0037 | 1.0036 | 1.0036 | 1.0035 | 1.0034 |
| <b>2.35</b> | 1.0042 | 1.0040 | 1.0038 | 1.0037 | 1.0036 | 1.0035 | 1.0034 | 1.0033 | 1.0032 |
| <b>2.36</b> | 1.0040 | 1.0038 | 1.0036 | 1.0035 | 1.0034 | 1.0033 | 1.0032 | 1.0031 | 1.0030 |
| <b>2.37</b> | 1.0039 | 1.0037 | 1.0035 | 1.0034 | 1.0033 | 1.0032 | 1.0031 | 1.0030 | 1.0029 |
| <b>2.38</b> | 1.0037 | 1.0035 | 1.0033 | 1.0032 | 1.0031 | 1.0030 | 1.0029 | 1.0028 | 1.0027 |
| <b>2.39</b> | 1.0036 | 1.0034 | 1.0032 | 1.0031 | 1.0030 | 1.0029 | 1.0028 | 1.0027 | 1.0026 |
| <b>2.40</b> | 1.0034 | 1.0032 | 1.0030 | 1.0029 | 1.0028 | 1.0027 | 1.0026 | 1.0025 | 1.0024 |

|                                  | <b>C2 C-O Bond Distance→</b> |             |             |             |             |             |             |             |             |        |
|----------------------------------|------------------------------|-------------|-------------|-------------|-------------|-------------|-------------|-------------|-------------|--------|
| <b>C3 C-O Bond Distance</b><br>↓ | <b>2.17</b>                  | <b>2.18</b> | <b>2.19</b> | <b>2.20</b> | <b>2.21</b> | <b>2.22</b> | <b>2.23</b> | <b>2.24</b> | <b>2.25</b> |        |
| <b>1.90</b>                      | 1.0253                       | 1.0254      | 1.0254      | 1.0255      | 1.0255      | 1.0256      | 1.0256      | 1.0256      | 1.0256      | 1.0256 |
| <b>1.91</b>                      | 1.0245                       | 1.0246      | 1.0247      | 1.0248      | 1.0248      | 1.0248      | 1.0248      | 1.0248      | 1.0248      | 1.0248 |
| <b>1.92</b>                      | 1.0238                       | 1.0239      | 1.0239      | 1.0240      | 1.0240      | 1.0240      | 1.0240      | 1.0240      | 1.0240      | 1.0240 |
| <b>1.93</b>                      | 1.0231                       | 1.0231      | 1.0232      | 1.0232      | 1.0232      | 1.0232      | 1.0232      | 1.0232      | 1.0232      | 1.0231 |
| <b>1.94</b>                      | 1.0224                       | 1.0224      | 1.0224      | 1.0224      | 1.0224      | 1.0224      | 1.0224      | 1.0224      | 1.0223      | 1.0223 |
| <b>1.95</b>                      | 1.0216                       | 1.0216      | 1.0217      | 1.0217      | 1.0216      | 1.0216      | 1.0216      | 1.0216      | 1.0215      | 1.0215 |
| <b>1.96</b>                      | 1.0209                       | 1.0209      | 1.0209      | 1.0209      | 1.0209      | 1.0208      | 1.0208      | 1.0208      | 1.0207      | 1.0207 |
| <b>1.97</b>                      | 1.0202                       | 1.0202      | 1.0201      | 1.0201      | 1.0201      | 1.0200      | 1.0200      | 1.0200      | 1.0199      | 1.0199 |
| <b>1.98</b>                      | 1.0194                       | 1.0194      | 1.0194      | 1.0194      | 1.0193      | 1.0192      | 1.0192      | 1.0192      | 1.0191      | 1.0190 |
| <b>1.99</b>                      | 1.0187                       | 1.0187      | 1.0186      | 1.0186      | 1.0185      | 1.0184      | 1.0184      | 1.0184      | 1.0183      | 1.0182 |
| <b>2.00</b>                      | 1.0180                       | 1.0179      | 1.0179      | 1.0178      | 1.0177      | 1.0177      | 1.0176      | 1.0175      | 1.0174      | 1.0174 |
| <b>2.01</b>                      | 1.0173                       | 1.0173      | 1.0172      | 1.0171      | 1.0170      | 1.0170      | 1.0169      | 1.0168      | 1.0167      | 1.0167 |
| <b>2.02</b>                      | 1.0167                       | 1.0166      | 1.0165      | 1.0164      | 1.0164      | 1.0163      | 1.0162      | 1.0161      | 1.0160      | 1.0160 |
| <b>2.03</b>                      | 1.0160                       | 1.0159      | 1.0158      | 1.0158      | 1.0157      | 1.0156      | 1.0155      | 1.0154      | 1.0153      | 1.0153 |
| <b>2.04</b>                      | 1.0153                       | 1.0152      | 1.0152      | 1.0151      | 1.0150      | 1.0149      | 1.0148      | 1.0147      | 1.0146      | 1.0146 |
| <b>2.05</b>                      | 1.0147                       | 1.0146      | 1.0145      | 1.0144      | 1.0143      | 1.0142      | 1.0141      | 1.0140      | 1.0138      | 1.0138 |
| <b>2.06</b>                      | 1.0140                       | 1.0139      | 1.0138      | 1.0137      | 1.0136      | 1.0135      | 1.0134      | 1.0132      | 1.0131      | 1.0131 |
| <b>2.07</b>                      | 1.0134                       | 1.0132      | 1.0131      | 1.0130      | 1.0129      | 1.0128      | 1.0127      | 1.0125      | 1.0124      | 1.0124 |
| <b>2.08</b>                      | 1.0127                       | 1.0126      | 1.0124      | 1.0123      | 1.0122      | 1.0121      | 1.0120      | 1.0118      | 1.0117      | 1.0117 |
| <b>2.09</b>                      | 1.0120                       | 1.0119      | 1.0118      | 1.0116      | 1.0115      | 1.0114      | 1.0113      | 1.0111      | 1.0110      | 1.0110 |
| <b>2.10</b>                      | 1.0114                       | 1.0112      | 1.0111      | 1.0109      | 1.0108      | 1.0107      | 1.0106      | 1.0104      | 1.0103      | 1.0103 |
| <b>2.11</b>                      | 1.0109                       | 1.0107      | 1.0106      | 1.0104      | 1.0103      | 1.0102      | 1.0101      | 1.0100      | 1.0098      | 1.0098 |
| <b>2.12</b>                      | 1.0104                       | 1.0103      | 1.0101      | 1.0100      | 1.0098      | 1.0097      | 1.0096      | 1.0095      | 1.0094      | 1.0094 |
| <b>2.13</b>                      | 1.0099                       | 1.0098      | 1.0096      | 1.0095      | 1.0094      | 1.0092      | 1.0091      | 1.0090      | 1.0089      | 1.0089 |
| <b>2.14</b>                      | 1.0094                       | 1.0093      | 1.0091      | 1.0090      | 1.0089      | 1.0088      | 1.0086      | 1.0085      | 1.0084      | 1.0084 |
| <b>2.15</b>                      | 1.0090                       | 1.0088      | 1.0086      | 1.0085      | 1.0084      | 1.0083      | 1.0082      | 1.0081      | 1.0080      | 1.0080 |
| <b>2.16</b>                      | 1.0085                       | 1.0083      | 1.0082      | 1.0080      | 1.0079      | 1.0078      | 1.0077      | 1.0076      | 1.0075      | 1.0075 |
| <b>2.17</b>                      | 1.0080                       | 1.0078      | 1.0077      | 1.0075      | 1.0074      | 1.0073      | 1.0072      | 1.0071      | 1.0070      | 1.0070 |
| <b>2.18</b>                      | 1.0075                       | 1.0073      | 1.0072      | 1.0070      | 1.0069      | 1.0068      | 1.0067      | 1.0066      | 1.0065      | 1.0065 |

|             |        |        |        |        |        |        |        |        |        |
|-------------|--------|--------|--------|--------|--------|--------|--------|--------|--------|
| <b>2.19</b> | 1.0070 | 1.0069 | 1.0067 | 1.0065 | 1.0064 | 1.0064 | 1.0063 | 1.0062 | 1.0061 |
| <b>2.20</b> | 1.0065 | 1.0064 | 1.0062 | 1.0060 | 1.0060 | 1.0059 | 1.0058 | 1.0057 | 1.0056 |
| <b>2.21</b> | 1.0063 | 1.0061 | 1.0060 | 1.0058 | 1.0057 | 1.0056 | 1.0055 | 1.0055 | 1.0054 |
| <b>2.22</b> | 1.0060 | 1.0059 | 1.0057 | 1.0056 | 1.0055 | 1.0054 | 1.0053 | 1.0052 | 1.0051 |
| <b>2.23</b> | 1.0057 | 1.0056 | 1.0055 | 1.0053 | 1.0052 | 1.0051 | 1.0051 | 1.0050 | 1.0049 |
| <b>2.24</b> | 1.0055 | 1.0053 | 1.0052 | 1.0051 | 1.0050 | 1.0049 | 1.0048 | 1.0048 | 1.0047 |
| <b>2.25</b> | 1.0052 | 1.0051 | 1.0049 | 1.0048 | 1.0047 | 1.0047 | 1.0046 | 1.0045 | 1.0045 |
| <b>2.26</b> | 1.0049 | 1.0048 | 1.0047 | 1.0046 | 1.0045 | 1.0044 | 1.0044 | 1.0043 | 1.0042 |
| <b>2.27</b> | 1.0047 | 1.0046 | 1.0044 | 1.0043 | 1.0043 | 1.0042 | 1.0041 | 1.0041 | 1.0040 |
| <b>2.28</b> | 1.0044 | 1.0043 | 1.0042 | 1.0041 | 1.0040 | 1.0039 | 1.0039 | 1.0038 | 1.0038 |
| <b>2.29</b> | 1.0041 | 1.0040 | 1.0039 | 1.0038 | 1.0038 | 1.0037 | 1.0037 | 1.0036 | 1.0035 |
| <b>2.30</b> | 1.0039 | 1.0038 | 1.0037 | 1.0036 | 1.0035 | 1.0035 | 1.0034 | 1.0034 | 1.0033 |
| <b>2.31</b> | 1.0037 | 1.0036 | 1.0035 | 1.0034 | 1.0034 | 1.0033 | 1.0033 | 1.0033 | 1.0032 |
| <b>2.32</b> | 1.0036 | 1.0035 | 1.0034 | 1.0033 | 1.0032 | 1.0032 | 1.0032 | 1.0031 | 1.0031 |
| <b>2.33</b> | 1.0034 | 1.0033 | 1.0032 | 1.0031 | 1.0031 | 1.0031 | 1.0031 | 1.0030 | 1.0030 |
| <b>2.34</b> | 1.0033 | 1.0032 | 1.0031 | 1.0030 | 1.0030 | 1.0029 | 1.0029 | 1.0029 | 1.0029 |
| <b>2.35</b> | 1.0031 | 1.0030 | 1.0029 | 1.0028 | 1.0028 | 1.0028 | 1.0028 | 1.0028 | 1.0028 |
| <b>2.36</b> | 1.0029 | 1.0029 | 1.0028 | 1.0027 | 1.0027 | 1.0027 | 1.0027 | 1.0027 | 1.0027 |
| <b>2.37</b> | 1.0028 | 1.0027 | 1.0026 | 1.0025 | 1.0025 | 1.0025 | 1.0026 | 1.0026 | 1.0026 |
| <b>2.38</b> | 1.0026 | 1.0025 | 1.0024 | 1.0024 | 1.0024 | 1.0024 | 1.0024 | 1.0025 | 1.0025 |
| <b>2.39</b> | 1.0025 | 1.0024 | 1.0023 | 1.0022 | 1.0022 | 1.0023 | 1.0023 | 1.0024 | 1.0024 |
| <b>2.40</b> | 1.0023 | 1.0022 | 1.0021 | 1.0020 | 1.0021 | 1.0021 | 1.0022 | 1.0022 | 1.0023 |

|                                  | <b>C2 C-O Bond Distance→</b> |             |             |             |             |             |             |             |             |  |
|----------------------------------|------------------------------|-------------|-------------|-------------|-------------|-------------|-------------|-------------|-------------|--|
| <b>C3 C-O Bond Distance</b><br>↓ | <b>2.26</b>                  | <b>2.27</b> | <b>2.28</b> | <b>2.29</b> | <b>2.30</b> | <b>2.31</b> | <b>2.32</b> | <b>2.33</b> | <b>2.34</b> |  |
| <b>1.90</b>                      | 1.0256                       | 1.0256      | 1.0257      | 1.0257      | 1.0257      |             |             |             |             |  |
| <b>1.91</b>                      | 1.0248                       | 1.0248      | 1.0248      | 1.0248      | 1.0248      |             |             |             |             |  |
| <b>1.92</b>                      | 1.0240                       | 1.0240      | 1.0240      | 1.0239      | 1.0239      |             |             |             |             |  |
| <b>1.93</b>                      | 1.0231                       | 1.0231      | 1.0231      | 1.0231      | 1.0231      |             |             |             |             |  |
| <b>1.94</b>                      | 1.0223                       | 1.0223      | 1.0222      | 1.0222      | 1.0222      |             |             |             |             |  |
| <b>1.95</b>                      | 1.0215                       | 1.0214      | 1.0214      | 1.0214      | 1.0213      |             |             |             |             |  |
| <b>1.96</b>                      | 1.0206                       | 1.0206      | 1.0205      | 1.0205      | 1.0205      |             |             |             |             |  |
| <b>1.97</b>                      | 1.0198                       | 1.0197      | 1.0197      | 1.0196      | 1.0196      |             |             |             |             |  |
| <b>1.98</b>                      | 1.0190                       | 1.0189      | 1.0188      | 1.0188      | 1.0187      |             |             |             |             |  |
| <b>1.99</b>                      | 1.0181                       | 1.0181      | 1.0180      | 1.0179      | 1.0178      |             |             |             |             |  |
| <b>2.00</b>                      | 1.0173                       | 1.0172      | 1.0171      | 1.0170      | 1.0170      | 1.0168      | 1.0167      | 1.0166      | 1.0164      |  |
| <b>2.01</b>                      | 1.0166                       | 1.0165      | 1.0164      | 1.0163      | 1.0162      | 1.0161      | 1.0160      | 1.0158      | 1.0157      |  |
| <b>2.02</b>                      | 1.0159                       | 1.0158      | 1.0157      | 1.0156      | 1.0155      | 1.0154      | 1.0152      | 1.0151      | 1.0150      |  |
| <b>2.03</b>                      | 1.0152                       | 1.0151      | 1.0150      | 1.0149      | 1.0148      | 1.0146      | 1.0145      | 1.0144      | 1.0143      |  |
| <b>2.04</b>                      | 1.0145                       | 1.0144      | 1.0142      | 1.0141      | 1.0140      | 1.0139      | 1.0138      | 1.0137      | 1.0135      |  |
| <b>2.05</b>                      | 1.0137                       | 1.0136      | 1.0135      | 1.0134      | 1.0133      | 1.0132      | 1.0131      | 1.0129      | 1.0128      |  |
| <b>2.06</b>                      | 1.0130                       | 1.0129      | 1.0128      | 1.0127      | 1.0126      | 1.0125      | 1.0123      | 1.0122      | 1.0121      |  |
| <b>2.07</b>                      | 1.0123                       | 1.0122      | 1.0121      | 1.0120      | 1.0119      | 1.0117      | 1.0116      | 1.0115      | 1.0113      |  |
| <b>2.08</b>                      | 1.0116                       | 1.0115      | 1.0114      | 1.0112      | 1.0111      | 1.0110      | 1.0109      | 1.0107      | 1.0106      |  |
| <b>2.09</b>                      | 1.0109                       | 1.0108      | 1.0106      | 1.0105      | 1.0104      | 1.0103      | 1.0101      | 1.0100      | 1.0099      |  |
| <b>2.10</b>                      | 1.0102                       | 1.0100      | 1.0099      | 1.0098      | 1.0097      | 1.0095      | 1.0094      | 1.0093      | 1.0092      |  |
| <b>2.11</b>                      | 1.0097                       | 1.0096      | 1.0095      | 1.0093      | 1.0092      | 1.0091      | 1.0090      | 1.0089      | 1.0088      |  |
| <b>2.12</b>                      | 1.0092                       | 1.0091      | 1.0090      | 1.0089      | 1.0088      | 1.0087      | 1.0086      | 1.0085      | 1.0084      |  |
| <b>2.13</b>                      | 1.0088                       | 1.0087      | 1.0085      | 1.0084      | 1.0083      | 1.0082      | 1.0082      | 1.0081      | 1.0080      |  |
| <b>2.14</b>                      | 1.0083                       | 1.0082      | 1.0081      | 1.0080      | 1.0079      | 1.0078      | 1.0077      | 1.0077      | 1.0076      |  |
| <b>2.15</b>                      | 1.0078                       | 1.0077      | 1.0076      | 1.0075      | 1.0074      | 1.0074      | 1.0073      | 1.0073      | 1.0073      |  |
| <b>2.16</b>                      | 1.0074                       | 1.0073      | 1.0072      | 1.0071      | 1.0070      | 1.0069      | 1.0069      | 1.0069      | 1.0069      |  |
| <b>2.17</b>                      | 1.0069                       | 1.0068      | 1.0067      | 1.0066      | 1.0065      | 1.0065      | 1.0065      | 1.0065      | 1.0065      |  |
| <b>2.18</b>                      | 1.0064                       | 1.0063      | 1.0062      | 1.0062      | 1.0061      | 1.0061      | 1.0061      | 1.0061      | 1.0061      |  |
| <b>2.19</b>                      | 1.0060                       | 1.0059      | 1.0058      | 1.0057      | 1.0056      | 1.0056      | 1.0057      | 1.0057      | 1.0057      |  |
| <b>2.20</b>                      | 1.0055                       | 1.0054      | 1.0053      | 1.0052      | 1.0052      | 1.0052      | 1.0053      | 1.0053      | 1.0054      |  |
| <b>2.21</b>                      | 1.0053                       | 1.0052      | 1.0051      | 1.0050      | 1.0049      | 1.0050      | 1.0050      | 1.0051      | 1.0051      |  |

|             |        |        |        |        |        |        |        |        |        |
|-------------|--------|--------|--------|--------|--------|--------|--------|--------|--------|
| <b>2.22</b> | 1.0051 | 1.0050 | 1.0049 | 1.0048 | 1.0047 | 1.0048 | 1.0048 | 1.0049 | 1.0049 |
| <b>2.23</b> | 1.0048 | 1.0048 | 1.0047 | 1.0046 | 1.0045 | 1.0046 | 1.0046 | 1.0046 | 1.0047 |
| <b>2.24</b> | 1.0046 | 1.0045 | 1.0045 | 1.0044 | 1.0043 | 1.0043 | 1.0044 | 1.0044 | 1.0044 |
| <b>2.25</b> | 1.0044 | 1.0043 | 1.0042 | 1.0042 | 1.0041 | 1.0041 | 1.0042 | 1.0042 | 1.0042 |
| <b>2.26</b> | 1.0042 | 1.0041 | 1.0040 | 1.0040 | 1.0039 | 1.0039 | 1.0039 | 1.0040 | 1.0040 |
| <b>2.27</b> | 1.0039 | 1.0039 | 1.0038 | 1.0037 | 1.0037 | 1.0037 | 1.0037 | 1.0037 | 1.0037 |
| <b>2.28</b> | 1.0037 | 1.0036 | 1.0036 | 1.0035 | 1.0035 | 1.0035 | 1.0035 | 1.0035 | 1.0035 |
| <b>2.29</b> | 1.0035 | 1.0034 | 1.0034 | 1.0033 | 1.0033 | 1.0033 | 1.0033 | 1.0033 | 1.0033 |
| <b>2.30</b> | 1.0033 | 1.0032 | 1.0031 | 1.0031 | 1.0030 | 1.0030 | 1.0030 | 1.0031 | 1.0031 |
| <b>2.31</b> | 1.0032 | 1.0031 | 1.0031 | 1.0030 | 1.0030 | 1.0030 | 1.0030 | 1.0030 | 1.0030 |
| <b>2.32</b> | 1.0031 | 1.0030 | 1.0030 | 1.0030 | 1.0029 | 1.0029 | 1.0029 | 1.0029 | 1.0029 |
| <b>2.33</b> | 1.0030 | 1.0030 | 1.0029 | 1.0029 | 1.0029 | 1.0029 | 1.0029 | 1.0029 | 1.0029 |
| <b>2.34</b> | 1.0029 | 1.0029 | 1.0029 | 1.0029 | 1.0028 | 1.0028 | 1.0028 | 1.0028 | 1.0028 |
| <b>2.35</b> | 1.0028 | 1.0028 | 1.0028 | 1.0028 | 1.0028 | 1.0028 | 1.0028 | 1.0028 | 1.0028 |
| <b>2.36</b> | 1.0027 | 1.0027 | 1.0027 | 1.0027 | 1.0027 | 1.0027 | 1.0027 | 1.0027 | 1.0027 |
| <b>2.37</b> | 1.0026 | 1.0026 | 1.0027 | 1.0027 | 1.0027 | 1.0027 | 1.0027 | 1.0027 | 1.0027 |
| <b>2.38</b> | 1.0025 | 1.0026 | 1.0026 | 1.0026 | 1.0027 | 1.0026 | 1.0026 | 1.0026 | 1.0026 |
| <b>2.39</b> | 1.0024 | 1.0025 | 1.0025 | 1.0026 | 1.0026 | 1.0026 | 1.0026 | 1.0026 | 1.0026 |
| <b>2.40</b> | 1.0024 | 1.0024 | 1.0025 | 1.0025 | 1.0026 | 1.0025 | 1.0025 | 1.0025 | 1.0025 |

| C3 C-O<br>Bond<br>Distance<br>↓ | C2 C-O<br>Bond<br>Distance→ |        |        |        |        |        |        |        |        |
|---------------------------------|-----------------------------|--------|--------|--------|--------|--------|--------|--------|--------|
|                                 | 2.35                        | 2.36   | 2.37   | 2.38   | 2.39   | 2.40   | 2.41   | 2.42   | 2.43   |
| <b>2.00</b>                     | 1.0163                      | 1.0162 | 1.0161 | 1.0159 | 1.0158 | 1.0157 | 1.0155 | 1.0153 | 1.0152 |
| <b>2.01</b>                     | 1.0156                      | 1.0155 | 1.0153 | 1.0152 | 1.0151 | 1.0149 | 1.0148 | 1.0146 | 1.0145 |
| <b>2.02</b>                     | 1.0149                      | 1.0147 | 1.0146 | 1.0145 | 1.0143 | 1.0142 | 1.0141 | 1.0139 | 1.0137 |
| <b>2.03</b>                     | 1.0141                      | 1.0140 | 1.0139 | 1.0137 | 1.0136 | 1.0135 | 1.0133 | 1.0132 | 1.0130 |
| <b>2.04</b>                     | 1.0134                      | 1.0133 | 1.0131 | 1.0130 | 1.0129 | 1.0128 | 1.0126 | 1.0125 | 1.0123 |
| <b>2.05</b>                     | 1.0127                      | 1.0125 | 1.0124 | 1.0123 | 1.0122 | 1.0120 | 1.0119 | 1.0118 | 1.0116 |
| <b>2.06</b>                     | 1.0119                      | 1.0118 | 1.0117 | 1.0116 | 1.0114 | 1.0113 | 1.0112 | 1.0110 | 1.0109 |
| <b>2.07</b>                     | 1.0112                      | 1.0111 | 1.0110 | 1.0108 | 1.0107 | 1.0106 | 1.0104 | 1.0103 | 1.0102 |
| <b>2.08</b>                     | 1.0105                      | 1.0104 | 1.0102 | 1.0101 | 1.0100 | 1.0098 | 1.0097 | 1.0096 | 1.0095 |
| <b>2.09</b>                     | 1.0098                      | 1.0096 | 1.0095 | 1.0094 | 1.0092 | 1.0091 | 1.0090 | 1.0089 | 1.0088 |
| <b>2.10</b>                     | 1.0090                      | 1.0089 | 1.0088 | 1.0086 | 1.0085 | 1.0084 | 1.0083 | 1.0082 | 1.0081 |
| <b>2.11</b>                     | 1.0087                      | 1.0086 | 1.0084 | 1.0083 | 1.0082 | 1.0081 | 1.0080 | 1.0079 | 1.0078 |
| <b>2.12</b>                     | 1.0083                      | 1.0082 | 1.0081 | 1.0080 | 1.0079 | 1.0078 | 1.0077 | 1.0076 | 1.0075 |
| <b>2.13</b>                     | 1.0079                      | 1.0079 | 1.0078 | 1.0077 | 1.0076 | 1.0076 | 1.0075 | 1.0073 | 1.0072 |
| <b>2.14</b>                     | 1.0076                      | 1.0075 | 1.0075 | 1.0074 | 1.0073 | 1.0073 | 1.0072 | 1.0071 | 1.0070 |
| <b>2.15</b>                     | 1.0072                      | 1.0072 | 1.0071 | 1.0071 | 1.0071 | 1.0070 | 1.0069 | 1.0068 | 1.0067 |
| <b>2.16</b>                     | 1.0069                      | 1.0068 | 1.0068 | 1.0068 | 1.0068 | 1.0067 | 1.0066 | 1.0065 | 1.0064 |
| <b>2.17</b>                     | 1.0065                      | 1.0065 | 1.0065 | 1.0065 | 1.0065 | 1.0065 | 1.0064 | 1.0062 | 1.0061 |
| <b>2.18</b>                     | 1.0061                      | 1.0061 | 1.0062 | 1.0062 | 1.0062 | 1.0062 | 1.0061 | 1.0060 | 1.0059 |
| <b>2.19</b>                     | 1.0058                      | 1.0058 | 1.0058 | 1.0059 | 1.0059 | 1.0059 | 1.0058 | 1.0057 | 1.0056 |
| <b>2.20</b>                     | 1.0054                      | 1.0055 | 1.0055 | 1.0056 | 1.0056 | 1.0057 | 1.0055 | 1.0054 | 1.0053 |
| <b>2.21</b>                     | 1.0052                      | 1.0052 | 1.0053 | 1.0053 | 1.0053 | 1.0054 | 1.0053 | 1.0052 | 1.0051 |
| <b>2.22</b>                     | 1.0049                      | 1.0050 | 1.0050 | 1.0051 | 1.0051 | 1.0051 | 1.0050 | 1.0050 | 1.0049 |
| <b>2.23</b>                     | 1.0047                      | 1.0047 | 1.0048 | 1.0048 | 1.0048 | 1.0049 | 1.0048 | 1.0047 | 1.0046 |
| <b>2.24</b>                     | 1.0045                      | 1.0045 | 1.0045 | 1.0046 | 1.0046 | 1.0046 | 1.0046 | 1.0045 | 1.0044 |
| <b>2.25</b>                     | 1.0042                      | 1.0043 | 1.0043 | 1.0043 | 1.0043 | 1.0044 | 1.0043 | 1.0043 | 1.0042 |
| <b>2.26</b>                     | 1.0040                      | 1.0040 | 1.0040 | 1.0041 | 1.0041 | 1.0041 | 1.0041 | 1.0040 | 1.0040 |
| <b>2.27</b>                     | 1.0038                      | 1.0038 | 1.0038 | 1.0038 | 1.0038 | 1.0039 | 1.0038 | 1.0038 | 1.0038 |
| <b>2.28</b>                     | 1.0035                      | 1.0035 | 1.0036 | 1.0036 | 1.0036 | 1.0036 | 1.0036 | 1.0036 | 1.0036 |
| <b>2.29</b>                     | 1.0033                      | 1.0033 | 1.0033 | 1.0033 | 1.0033 | 1.0033 | 1.0033 | 1.0033 | 1.0033 |
| <b>2.30</b>                     | 1.0031                      | 1.0031 | 1.0031 | 1.0031 | 1.0031 | 1.0031 | 1.0031 | 1.0031 | 1.0031 |
| <b>2.31</b>                     | 1.0030                      | 1.0030 | 1.0030 | 1.0030 | 1.0030 | 1.0030 |        |        |        |
| <b>2.32</b>                     | 1.0029                      | 1.0029 | 1.0029 | 1.0029 | 1.0029 | 1.0029 |        |        |        |
| <b>2.33</b>                     | 1.0029                      | 1.0029 | 1.0029 | 1.0029 | 1.0029 | 1.0029 |        |        |        |
| <b>2.34</b>                     | 1.0028                      | 1.0028 | 1.0028 | 1.0028 | 1.0028 | 1.0028 |        |        |        |

|             |        |        |        |        |        |        |
|-------------|--------|--------|--------|--------|--------|--------|
| <b>2.35</b> | 1.0028 | 1.0028 | 1.0028 | 1.0028 | 1.0027 | 1.0027 |
| <b>2.36</b> | 1.0027 | 1.0027 | 1.0027 | 1.0027 | 1.0027 | 1.0027 |
| <b>2.37</b> | 1.0027 | 1.0026 | 1.0026 | 1.0026 | 1.0026 | 1.0026 |
| <b>2.38</b> | 1.0026 | 1.0026 | 1.0026 | 1.0026 | 1.0026 | 1.0025 |
| <b>2.39</b> | 1.0025 | 1.0025 | 1.0025 | 1.0025 | 1.0025 | 1.0025 |
| <b>2.40</b> | 1.0025 | 1.0025 | 1.0025 | 1.0024 | 1.0024 | 1.0024 |

|                             | <b>C2 C-O Bond Distance→</b> |             |             |             |             |             |             |
|-----------------------------|------------------------------|-------------|-------------|-------------|-------------|-------------|-------------|
| <b>C3 C-O Bond Distance</b> | <b>2.44</b>                  | <b>2.45</b> | <b>2.46</b> | <b>2.47</b> | <b>2.48</b> | <b>2.49</b> | <b>2.50</b> |
| <b>2.00</b>                 | 1.0150                       | 1.0148      | 1.0147      | 1.0145      | 1.0143      | 1.0142      | 1.0140      |
| <b>2.01</b>                 | 1.0143                       | 1.0141      | 1.0140      | 1.0138      | 1.0137      | 1.0135      | 1.0133      |
| <b>2.02</b>                 | 1.0136                       | 1.0134      | 1.0133      | 1.0131      | 1.0130      | 1.0128      | 1.0127      |
| <b>2.03</b>                 | 1.0129                       | 1.0127      | 1.0126      | 1.0125      | 1.0123      | 1.0122      | 1.0120      |
| <b>2.04</b>                 | 1.0122                       | 1.0120      | 1.0119      | 1.0118      | 1.0116      | 1.0115      | 1.0113      |
| <b>2.05</b>                 | 1.0115                       | 1.0114      | 1.0112      | 1.0111      | 1.0109      | 1.0108      | 1.0107      |
| <b>2.06</b>                 | 1.0108                       | 1.0107      | 1.0105      | 1.0104      | 1.0103      | 1.0101      | 1.0100      |
| <b>2.07</b>                 | 1.0101                       | 1.0100      | 1.0098      | 1.0097      | 1.0096      | 1.0095      | 1.0093      |
| <b>2.08</b>                 | 1.0094                       | 1.0093      | 1.0091      | 1.0090      | 1.0089      | 1.0088      | 1.0087      |
| <b>2.09</b>                 | 1.0087                       | 1.0086      | 1.0085      | 1.0083      | 1.0082      | 1.0081      | 1.0080      |
| <b>2.10</b>                 | 1.0080                       | 1.0079      | 1.0078      | 1.0077      | 1.0076      | 1.0075      | 1.0074      |
| <b>2.11</b>                 | 1.0077                       | 1.0076      | 1.0075      | 1.0074      | 1.0073      | 1.0072      | 1.0071      |
| <b>2.12</b>                 | 1.0074                       | 1.0073      | 1.0072      | 1.0071      | 1.0070      | 1.0069      | 1.0068      |
| <b>2.13</b>                 | 1.0071                       | 1.0070      | 1.0069      | 1.0068      | 1.0067      | 1.0066      | 1.0065      |
| <b>2.14</b>                 | 1.0069                       | 1.0067      | 1.0066      | 1.0065      | 1.0064      | 1.0063      | 1.0062      |
| <b>2.15</b>                 | 1.0066                       | 1.0065      | 1.0064      | 1.0062      | 1.0061      | 1.0060      | 1.0059      |
| <b>2.16</b>                 | 1.0063                       | 1.0062      | 1.0061      | 1.0060      | 1.0058      | 1.0057      | 1.0056      |
| <b>2.17</b>                 | 1.0060                       | 1.0059      | 1.0058      | 1.0057      | 1.0056      | 1.0055      | 1.0053      |
| <b>2.18</b>                 | 1.0057                       | 1.0056      | 1.0055      | 1.0054      | 1.0053      | 1.0052      | 1.0050      |
| <b>2.19</b>                 | 1.0055                       | 1.0053      | 1.0052      | 1.0051      | 1.0050      | 1.0049      | 1.0048      |
| <b>2.20</b>                 | 1.0052                       | 1.0051      | 1.0049      | 1.0048      | 1.0047      | 1.0046      | 1.0045      |
| <b>2.21</b>                 | 1.0050                       | 1.0049      | 1.0048      | 1.0047      | 1.0046      | 1.0045      | 1.0044      |
| <b>2.22</b>                 | 1.0048                       | 1.0047      | 1.0046      | 1.0045      | 1.0044      | 1.0043      | 1.0042      |
| <b>2.23</b>                 | 1.0046                       | 1.0045      | 1.0044      | 1.0043      | 1.0043      | 1.0042      | 1.0041      |
| <b>2.24</b>                 | 1.0044                       | 1.0043      | 1.0042      | 1.0042      | 1.0041      | 1.0040      | 1.0040      |
| <b>2.25</b>                 | 1.0042                       | 1.0041      | 1.0041      | 1.0040      | 1.0040      | 1.0039      | 1.0039      |
| <b>2.26</b>                 | 1.0040                       | 1.0039      | 1.0039      | 1.0038      | 1.0038      | 1.0038      | 1.0037      |
| <b>2.27</b>                 | 1.0038                       | 1.0037      | 1.0037      | 1.0037      | 1.0037      | 1.0036      | 1.0036      |
| <b>2.28</b>                 | 1.0036                       | 1.0035      | 1.0035      | 1.0035      | 1.0035      | 1.0035      | 1.0035      |
| <b>2.29</b>                 | 1.0033                       | 1.0034      | 1.0034      | 1.0034      | 1.0034      | 1.0034      | 1.0034      |
| <b>2.30</b>                 | 1.0031                       | 1.0032      | 1.0032      | 1.0032      | 1.0032      | 1.0032      | 1.0032      |

## Predicted KIE at C2

|                             | <b>C2 C-O Bond Distance→</b> |             |             |             |             |             |             |             |             |
|-----------------------------|------------------------------|-------------|-------------|-------------|-------------|-------------|-------------|-------------|-------------|
| <b>C3 C-O Bond Distance</b> | <b>1.90</b>                  | <b>1.91</b> | <b>1.92</b> | <b>1.93</b> | <b>1.94</b> | <b>1.95</b> | <b>1.96</b> | <b>1.97</b> | <b>1.98</b> |
| <b>1.90</b>                 | 1.0216                       | 1.0212      | 1.0209      | 1.0205      | 1.0202      | 1.0199      | 1.0195      | 1.0192      | 1.0188      |
| <b>1.91</b>                 | 1.0217                       | 1.0213      | 1.0210      | 1.0206      | 1.0203      | 1.0199      | 1.0195      | 1.0192      | 1.0188      |
| <b>1.92</b>                 | 1.0218                       | 1.0214      | 1.0211      | 1.0207      | 1.0203      | 1.0199      | 1.0195      | 1.0192      | 1.0188      |
| <b>1.93</b>                 | 1.0220                       | 1.0216      | 1.0212      | 1.0208      | 1.0204      | 1.0200      | 1.0196      | 1.0192      | 1.0188      |
| <b>1.94</b>                 | 1.0221                       | 1.0217      | 1.0212      | 1.0208      | 1.0204      | 1.0200      | 1.0196      | 1.0191      | 1.0187      |
| <b>1.95</b>                 | 1.0222                       | 1.0218      | 1.0213      | 1.0209      | 1.0205      | 1.0200      | 1.0196      | 1.0191      | 1.0187      |
| <b>1.96</b>                 | 1.0223                       | 1.0219      | 1.0214      | 1.0210      | 1.0205      | 1.0200      | 1.0196      | 1.0191      | 1.0187      |
| <b>1.97</b>                 | 1.0225                       | 1.0220      | 1.0215      | 1.0210      | 1.0206      | 1.0201      | 1.0196      | 1.0191      | 1.0187      |
| <b>1.98</b>                 | 1.0226                       | 1.0221      | 1.0216      | 1.0211      | 1.0206      | 1.0201      | 1.0196      | 1.0191      | 1.0186      |

|      |        |        |        |        |        |        |        |        |        |
|------|--------|--------|--------|--------|--------|--------|--------|--------|--------|
| 1.99 | 1.0227 | 1.0222 | 1.0217 | 1.0212 | 1.0207 | 1.0201 | 1.0196 | 1.0191 | 1.0186 |
| 2.00 | 1.0228 | 1.0223 | 1.0218 | 1.0212 | 1.0207 | 1.0202 | 1.0196 | 1.0191 | 1.0186 |
| 2.01 | 1.0229 | 1.0224 | 1.0218 | 1.0213 | 1.0207 | 1.0202 | 1.0196 | 1.0191 | 1.0185 |
| 2.02 | 1.0230 | 1.0224 | 1.0219 | 1.0213 | 1.0208 | 1.0202 | 1.0196 | 1.0191 | 1.0185 |
| 2.03 | 1.0231 | 1.0225 | 1.0219 | 1.0214 | 1.0208 | 1.0202 | 1.0196 | 1.0191 | 1.0185 |
| 2.04 | 1.0232 | 1.0226 | 1.0220 | 1.0214 | 1.0208 | 1.0202 | 1.0196 | 1.0191 | 1.0185 |
| 2.05 | 1.0233 | 1.0227 | 1.0221 | 1.0215 | 1.0209 | 1.0202 | 1.0196 | 1.0190 | 1.0184 |
| 2.06 | 1.0234 | 1.0227 | 1.0221 | 1.0215 | 1.0209 | 1.0203 | 1.0196 | 1.0190 | 1.0184 |
| 2.07 | 1.0234 | 1.0228 | 1.0222 | 1.0215 | 1.0209 | 1.0203 | 1.0196 | 1.0190 | 1.0184 |
| 2.08 | 1.0235 | 1.0229 | 1.0222 | 1.0216 | 1.0209 | 1.0203 | 1.0196 | 1.0190 | 1.0184 |
| 2.09 | 1.0236 | 1.0230 | 1.0223 | 1.0216 | 1.0210 | 1.0203 | 1.0196 | 1.0190 | 1.0183 |
| 2.10 | 1.0237 | 1.0230 | 1.0224 | 1.0217 | 1.0210 | 1.0203 | 1.0196 | 1.0190 | 1.0183 |
| 2.11 | 1.0238 | 1.0231 | 1.0224 | 1.0217 | 1.0210 | 1.0203 | 1.0196 | 1.0190 | 1.0183 |
| 2.12 | 1.0238 | 1.0231 | 1.0224 | 1.0217 | 1.0210 | 1.0203 | 1.0196 | 1.0189 | 1.0182 |
| 2.13 | 1.0239 | 1.0232 | 1.0225 | 1.0218 | 1.0211 | 1.0204 | 1.0196 | 1.0189 | 1.0182 |
| 2.14 | 1.0240 | 1.0233 | 1.0225 | 1.0218 | 1.0211 | 1.0204 | 1.0196 | 1.0189 | 1.0182 |
| 2.15 | 1.0241 | 1.0233 | 1.0226 | 1.0218 | 1.0211 | 1.0204 | 1.0196 | 1.0189 | 1.0182 |
| 2.16 | 1.0241 | 1.0234 | 1.0226 | 1.0219 | 1.0211 | 1.0204 | 1.0196 | 1.0189 | 1.0181 |
| 2.17 | 1.0242 | 1.0234 | 1.0227 | 1.0219 | 1.0211 | 1.0204 | 1.0196 | 1.0189 | 1.0181 |
| 2.18 | 1.0243 | 1.0235 | 1.0227 | 1.0219 | 1.0212 | 1.0204 | 1.0196 | 1.0188 | 1.0181 |
| 2.19 | 1.0243 | 1.0235 | 1.0228 | 1.0220 | 1.0212 | 1.0204 | 1.0196 | 1.0188 | 1.0180 |
| 2.20 | 1.0244 | 1.0236 | 1.0228 | 1.0220 | 1.0212 | 1.0204 | 1.0196 | 1.0188 | 1.0180 |
| 2.21 | 1.0245 | 1.0237 | 1.0228 | 1.0220 | 1.0212 | 1.0204 | 1.0196 | 1.0188 | 1.0180 |
| 2.22 | 1.0245 | 1.0237 | 1.0229 | 1.0221 | 1.0212 | 1.0204 | 1.0196 | 1.0188 | 1.0180 |
| 2.23 | 1.0246 | 1.0238 | 1.0229 | 1.0221 | 1.0213 | 1.0204 | 1.0196 | 1.0188 | 1.0179 |
| 2.24 | 1.0247 | 1.0238 | 1.0230 | 1.0221 | 1.0213 | 1.0204 | 1.0196 | 1.0187 | 1.0179 |
| 2.25 | 1.0247 | 1.0239 | 1.0230 | 1.0221 | 1.0213 | 1.0204 | 1.0196 | 1.0187 | 1.0179 |
| 2.26 | 1.0248 | 1.0239 | 1.0230 | 1.0222 | 1.0213 | 1.0204 | 1.0196 | 1.0187 | 1.0178 |
| 2.27 | 1.0248 | 1.0240 | 1.0231 | 1.0222 | 1.0213 | 1.0204 | 1.0196 | 1.0187 | 1.0178 |
| 2.28 | 1.0249 | 1.0240 | 1.0231 | 1.0222 | 1.0213 | 1.0204 | 1.0196 | 1.0187 | 1.0178 |
| 2.29 | 1.0250 | 1.0241 | 1.0232 | 1.0223 | 1.0214 | 1.0204 | 1.0195 | 1.0186 | 1.0177 |
| 2.30 | 1.0250 | 1.0241 | 1.0232 | 1.0223 | 1.0214 | 1.0205 | 1.0195 | 1.0186 | 1.0177 |

| C3 C-O<br>Bond<br>Distance<br>↓ | C2 C-O<br>Bond<br>Distance→ |        |        |        |        |        |        |        |        |        |
|---------------------------------|-----------------------------|--------|--------|--------|--------|--------|--------|--------|--------|--------|
|                                 | 1.99                        | 2.00   | 2.01   | 2.02   | 2.03   | 2.04   | 2.05   | 2.06   | 2.07   |        |
| 1.90                            | 1.0185                      | 1.0182 | 1.0177 | 1.0173 | 1.0168 | 1.0164 | 1.0159 | 1.0155 | 1.0150 | 1.0150 |
| 1.91                            | 1.0184                      | 1.0181 | 1.0176 | 1.0172 | 1.0167 | 1.0163 | 1.0158 | 1.0154 | 1.0150 | 1.0149 |
| 1.92                            | 1.0184                      | 1.0180 | 1.0176 | 1.0171 | 1.0166 | 1.0162 | 1.0157 | 1.0152 | 1.0150 | 1.0148 |
| 1.93                            | 1.0184                      | 1.0180 | 1.0175 | 1.0170 | 1.0165 | 1.0161 | 1.0156 | 1.0151 | 1.0150 | 1.0147 |
| 1.94                            | 1.0183                      | 1.0179 | 1.0174 | 1.0169 | 1.0165 | 1.0160 | 1.0155 | 1.0150 | 1.0150 | 1.0145 |
| 1.95                            | 1.0183                      | 1.0178 | 1.0173 | 1.0168 | 1.0164 | 1.0159 | 1.0154 | 1.0149 | 1.0149 | 1.0144 |
| 1.96                            | 1.0182                      | 1.0178 | 1.0173 | 1.0168 | 1.0163 | 1.0158 | 1.0153 | 1.0148 | 1.0148 | 1.0143 |
| 1.97                            | 1.0182                      | 1.0177 | 1.0172 | 1.0167 | 1.0162 | 1.0157 | 1.0152 | 1.0147 | 1.0147 | 1.0141 |
| 1.98                            | 1.0181                      | 1.0176 | 1.0171 | 1.0166 | 1.0161 | 1.0156 | 1.0150 | 1.0145 | 1.0145 | 1.0140 |
| 1.99                            | 1.0181                      | 1.0176 | 1.0170 | 1.0165 | 1.0160 | 1.0155 | 1.0149 | 1.0144 | 1.0144 | 1.0139 |
| 2.00                            | 1.0180                      | 1.0175 | 1.0170 | 1.0164 | 1.0159 | 1.0154 | 1.0148 | 1.0143 | 1.0143 | 1.0138 |
| 2.01                            | 1.0180                      | 1.0174 | 1.0169 | 1.0164 | 1.0158 | 1.0153 | 1.0147 | 1.0142 | 1.0142 | 1.0136 |
| 2.02                            | 1.0180                      | 1.0174 | 1.0168 | 1.0163 | 1.0157 | 1.0152 | 1.0146 | 1.0141 | 1.0141 | 1.0135 |
| 2.03                            | 1.0179                      | 1.0173 | 1.0168 | 1.0162 | 1.0157 | 1.0151 | 1.0145 | 1.0140 | 1.0140 | 1.0134 |
| 2.04                            | 1.0179                      | 1.0173 | 1.0167 | 1.0161 | 1.0156 | 1.0150 | 1.0144 | 1.0139 | 1.0139 | 1.0133 |
| 2.05                            | 1.0178                      | 1.0172 | 1.0166 | 1.0161 | 1.0155 | 1.0149 | 1.0143 | 1.0138 | 1.0138 | 1.0132 |
| 2.06                            | 1.0178                      | 1.0172 | 1.0166 | 1.0160 | 1.0154 | 1.0148 | 1.0142 | 1.0137 | 1.0137 | 1.0131 |
| 2.07                            | 1.0177                      | 1.0171 | 1.0165 | 1.0159 | 1.0153 | 1.0147 | 1.0142 | 1.0136 | 1.0136 | 1.0130 |
| 2.08                            | 1.0177                      | 1.0171 | 1.0165 | 1.0159 | 1.0153 | 1.0147 | 1.0141 | 1.0135 | 1.0135 | 1.0129 |
| 2.09                            | 1.0177                      | 1.0170 | 1.0164 | 1.0158 | 1.0152 | 1.0146 | 1.0140 | 1.0133 | 1.0133 | 1.0127 |
| 2.10                            | 1.0176                      | 1.0169 | 1.0163 | 1.0157 | 1.0151 | 1.0145 | 1.0139 | 1.0132 | 1.0132 | 1.0126 |
| 2.11                            | 1.0176                      | 1.0169 | 1.0163 | 1.0156 | 1.0150 | 1.0144 | 1.0138 | 1.0131 | 1.0131 | 1.0125 |
| 2.12                            | 1.0175                      | 1.0168 | 1.0162 | 1.0156 | 1.0149 | 1.0143 | 1.0137 | 1.0130 | 1.0130 | 1.0124 |
| 2.13                            | 1.0175                      | 1.0168 | 1.0161 | 1.0155 | 1.0149 | 1.0142 | 1.0136 | 1.0129 | 1.0129 | 1.0123 |

|      |        |        |        |        |        |        |        |        |        |
|------|--------|--------|--------|--------|--------|--------|--------|--------|--------|
| 2.14 | 1.0175 | 1.0167 | 1.0161 | 1.0154 | 1.0148 | 1.0141 | 1.0135 | 1.0128 | 1.0122 |
| 2.15 | 1.0174 | 1.0167 | 1.0160 | 1.0154 | 1.0147 | 1.0141 | 1.0134 | 1.0127 | 1.0121 |
| 2.16 | 1.0174 | 1.0166 | 1.0160 | 1.0153 | 1.0146 | 1.0140 | 1.0133 | 1.0126 | 1.0120 |
| 2.17 | 1.0173 | 1.0166 | 1.0159 | 1.0152 | 1.0146 | 1.0139 | 1.0132 | 1.0125 | 1.0119 |
| 2.18 | 1.0173 | 1.0165 | 1.0158 | 1.0152 | 1.0145 | 1.0138 | 1.0131 | 1.0124 | 1.0118 |
| 2.19 | 1.0173 | 1.0165 | 1.0158 | 1.0151 | 1.0144 | 1.0137 | 1.0130 | 1.0123 | 1.0116 |
| 2.20 | 1.0172 | 1.0164 | 1.0157 | 1.0150 | 1.0143 | 1.0136 | 1.0129 | 1.0122 | 1.0115 |
| 2.21 | 1.0172 | 1.0164 | 1.0157 | 1.0150 | 1.0143 | 1.0135 | 1.0128 | 1.0121 | 1.0114 |
| 2.22 | 1.0171 | 1.0163 | 1.0156 | 1.0149 | 1.0142 | 1.0135 | 1.0128 | 1.0120 | 1.0113 |
| 2.23 | 1.0171 | 1.0163 | 1.0155 | 1.0148 | 1.0141 | 1.0134 | 1.0127 | 1.0120 | 1.0112 |
| 2.24 | 1.0171 | 1.0162 | 1.0155 | 1.0148 | 1.0140 | 1.0133 | 1.0126 | 1.0119 | 1.0111 |
| 2.25 | 1.0170 | 1.0162 | 1.0154 | 1.0147 | 1.0140 | 1.0132 | 1.0125 | 1.0118 | 1.0110 |
| 2.26 | 1.0170 | 1.0161 | 1.0154 | 1.0146 | 1.0139 | 1.0131 | 1.0124 | 1.0117 | 1.0109 |
| 2.27 | 1.0169 | 1.0160 | 1.0153 | 1.0146 | 1.0138 | 1.0131 | 1.0123 | 1.0116 | 1.0108 |
| 2.28 | 1.0169 | 1.0160 | 1.0152 | 1.0145 | 1.0137 | 1.0130 | 1.0122 | 1.0115 | 1.0107 |
| 2.29 | 1.0168 | 1.0159 | 1.0152 | 1.0144 | 1.0137 | 1.0129 | 1.0121 | 1.0114 | 1.0106 |
| 2.30 | 1.0168 | 1.0159 | 1.0151 | 1.0144 | 1.0136 | 1.0128 | 1.0121 | 1.0113 | 1.0105 |
| 2.31 |        | 1.0158 | 1.0150 | 1.0142 | 1.0135 | 1.0127 | 1.0119 | 1.0112 | 1.0104 |
| 2.32 |        | 1.0157 | 1.0149 | 1.0141 | 1.0134 | 1.0126 | 1.0118 | 1.0111 | 1.0103 |
| 2.33 |        | 1.0155 | 1.0148 | 1.0140 | 1.0132 | 1.0125 | 1.0117 | 1.0109 | 1.0102 |
| 2.34 |        | 1.0154 | 1.0147 | 1.0139 | 1.0131 | 1.0124 | 1.0116 | 1.0108 | 1.0101 |
| 2.35 |        | 1.0153 | 1.0146 | 1.0138 | 1.0130 | 1.0123 | 1.0115 | 1.0107 | 1.0100 |
| 2.36 |        | 1.0152 | 1.0144 | 1.0137 | 1.0129 | 1.0121 | 1.0114 | 1.0106 | 1.0098 |
| 2.37 |        | 1.0151 | 1.0143 | 1.0136 | 1.0128 | 1.0120 | 1.0113 | 1.0105 | 1.0097 |
| 2.38 |        | 1.0150 | 1.0142 | 1.0134 | 1.0127 | 1.0119 | 1.0111 | 1.0104 | 1.0096 |
| 2.39 |        | 1.0149 | 1.0141 | 1.0133 | 1.0126 | 1.0118 | 1.0110 | 1.0103 | 1.0095 |
| 2.40 |        | 1.0147 | 1.0140 | 1.0132 | 1.0125 | 1.0117 | 1.0109 | 1.0102 | 1.0094 |

| C3 C-O<br>Bond<br>Distance<br>↓ | C2 C-O<br>Bond<br>Distance→ |        |        |        |        |        |        |        |        |  |
|---------------------------------|-----------------------------|--------|--------|--------|--------|--------|--------|--------|--------|--|
|                                 | 2.08                        | 2.09   | 2.10   | 2.11   | 2.12   | 2.13   | 2.14   | 2.15   | 2.16   |  |
| 1.90                            | 1.0146                      | 1.0142 | 1.0137 | 1.0134 | 1.0130 | 1.0127 | 1.0124 | 1.0121 | 1.0117 |  |
| 1.91                            | 1.0145                      | 1.0140 | 1.0136 | 1.0132 | 1.0129 | 1.0125 | 1.0122 | 1.0119 | 1.0115 |  |
| 1.92                            | 1.0143                      | 1.0139 | 1.0134 | 1.0131 | 1.0127 | 1.0124 | 1.0120 | 1.0117 | 1.0114 |  |
| 1.93                            | 1.0142                      | 1.0137 | 1.0132 | 1.0129 | 1.0126 | 1.0122 | 1.0119 | 1.0115 | 1.0112 |  |
| 1.94                            | 1.0140                      | 1.0136 | 1.0131 | 1.0127 | 1.0124 | 1.0120 | 1.0117 | 1.0113 | 1.0110 |  |
| 1.95                            | 1.0139                      | 1.0134 | 1.0129 | 1.0126 | 1.0122 | 1.0119 | 1.0115 | 1.0112 | 1.0108 |  |
| 1.96                            | 1.0138                      | 1.0133 | 1.0128 | 1.0124 | 1.0121 | 1.0117 | 1.0113 | 1.0110 | 1.0106 |  |
| 1.97                            | 1.0136                      | 1.0131 | 1.0126 | 1.0123 | 1.0119 | 1.0115 | 1.0112 | 1.0108 | 1.0104 |  |
| 1.98                            | 1.0135                      | 1.0130 | 1.0125 | 1.0121 | 1.0117 | 1.0114 | 1.0110 | 1.0106 | 1.0102 |  |
| 1.99                            | 1.0134                      | 1.0128 | 1.0123 | 1.0119 | 1.0116 | 1.0112 | 1.0108 | 1.0104 | 1.0101 |  |
| 2.00                            | 1.0132                      | 1.0127 | 1.0122 | 1.0118 | 1.0114 | 1.0110 | 1.0106 | 1.0103 | 1.0099 |  |
| 2.01                            | 1.0131                      | 1.0126 | 1.0120 | 1.0116 | 1.0112 | 1.0109 | 1.0105 | 1.0101 | 1.0097 |  |
| 2.02                            | 1.0130                      | 1.0124 | 1.0119 | 1.0115 | 1.0111 | 1.0107 | 1.0103 | 1.0099 | 1.0095 |  |
| 2.03                            | 1.0129                      | 1.0123 | 1.0117 | 1.0113 | 1.0109 | 1.0105 | 1.0102 | 1.0098 | 1.0094 |  |
| 2.04                            | 1.0127                      | 1.0122 | 1.0116 | 1.0112 | 1.0108 | 1.0104 | 1.0100 | 1.0096 | 1.0092 |  |
| 2.05                            | 1.0126                      | 1.0120 | 1.0115 | 1.0111 | 1.0106 | 1.0102 | 1.0098 | 1.0094 | 1.0090 |  |
| 2.06                            | 1.0125                      | 1.0119 | 1.0113 | 1.0109 | 1.0105 | 1.0101 | 1.0097 | 1.0093 | 1.0088 |  |
| 2.07                            | 1.0124                      | 1.0118 | 1.0112 | 1.0108 | 1.0104 | 1.0099 | 1.0095 | 1.0091 | 1.0087 |  |
| 2.08                            | 1.0123                      | 1.0117 | 1.0111 | 1.0106 | 1.0102 | 1.0098 | 1.0094 | 1.0089 | 1.0085 |  |
| 2.09                            | 1.0121                      | 1.0115 | 1.0109 | 1.0105 | 1.0101 | 1.0096 | 1.0092 | 1.0088 | 1.0083 |  |
| 2.10                            | 1.0120                      | 1.0114 | 1.0108 | 1.0103 | 1.0099 | 1.0095 | 1.0090 | 1.0086 | 1.0082 |  |
| 2.11                            | 1.0119                      | 1.0113 | 1.0106 | 1.0102 | 1.0098 | 1.0093 | 1.0089 | 1.0084 | 1.0080 |  |
| 2.12                            | 1.0118                      | 1.0111 | 1.0105 | 1.0101 | 1.0096 | 1.0092 | 1.0087 | 1.0083 | 1.0079 |  |
| 2.13                            | 1.0117                      | 1.0110 | 1.0104 | 1.0099 | 1.0095 | 1.0090 | 1.0086 | 1.0081 | 1.0077 |  |
| 2.14                            | 1.0115                      | 1.0109 | 1.0102 | 1.0098 | 1.0093 | 1.0089 | 1.0084 | 1.0080 | 1.0075 |  |
| 2.15                            | 1.0114                      | 1.0108 | 1.0101 | 1.0097 | 1.0092 | 1.0088 | 1.0083 | 1.0079 | 1.0074 |  |
| 2.16                            | 1.0113                      | 1.0106 | 1.0100 | 1.0095 | 1.0091 | 1.0086 | 1.0082 | 1.0077 | 1.0072 |  |
| 2.17                            | 1.0112                      | 1.0105 | 1.0098 | 1.0094 | 1.0089 | 1.0085 | 1.0080 | 1.0076 | 1.0071 |  |
| 2.18                            | 1.0111                      | 1.0104 | 1.0097 | 1.0092 | 1.0088 | 1.0083 | 1.0079 | 1.0074 | 1.0069 |  |



|      |        |        |        |        |        |        |        |        |        |
|------|--------|--------|--------|--------|--------|--------|--------|--------|--------|
| 2.19 | 1.0110 | 1.0103 | 1.0096 | 1.0091 | 1.0086 | 1.0082 | 1.0077 | 1.0073 | 1.0068 |
| 2.20 | 1.0108 | 1.0101 | 1.0094 | 1.0090 | 1.0085 | 1.0080 | 1.0076 | 1.0071 | 1.0066 |
| 2.21 | 1.0107 | 1.0100 | 1.0093 | 1.0089 | 1.0084 | 1.0079 | 1.0075 | 1.0070 | 1.0065 |
| 2.22 | 1.0106 | 1.0099 | 1.0092 | 1.0087 | 1.0083 | 1.0078 | 1.0074 | 1.0069 | 1.0064 |
| 2.23 | 1.0105 | 1.0098 | 1.0091 | 1.0086 | 1.0082 | 1.0077 | 1.0073 | 1.0068 | 1.0063 |
| 2.24 | 1.0104 | 1.0097 | 1.0090 | 1.0085 | 1.0081 | 1.0076 | 1.0071 | 1.0067 | 1.0062 |
| 2.25 | 1.0103 | 1.0096 | 1.0088 | 1.0084 | 1.0079 | 1.0075 | 1.0070 | 1.0066 | 1.0061 |
| 2.26 | 1.0102 | 1.0095 | 1.0087 | 1.0083 | 1.0078 | 1.0074 | 1.0069 | 1.0065 | 1.0060 |
| 2.27 | 1.0101 | 1.0093 | 1.0086 | 1.0082 | 1.0077 | 1.0073 | 1.0068 | 1.0064 | 1.0059 |
| 2.28 | 1.0100 | 1.0092 | 1.0085 | 1.0080 | 1.0076 | 1.0072 | 1.0067 | 1.0063 | 1.0058 |
| 2.29 | 1.0099 | 1.0091 | 1.0083 | 1.0079 | 1.0075 | 1.0070 | 1.0066 | 1.0062 | 1.0058 |
| 2.30 | 1.0098 | 1.0090 | 1.0082 | 1.0078 | 1.0074 | 1.0069 | 1.0065 | 1.0061 | 1.0057 |
| 2.31 | 1.0096 | 1.0089 | 1.0081 | 1.0077 | 1.0073 | 1.0069 | 1.0065 | 1.0061 | 1.0057 |
| 2.32 | 1.0095 | 1.0088 | 1.0080 | 1.0076 | 1.0072 | 1.0068 | 1.0064 | 1.0060 | 1.0057 |
| 2.33 | 1.0094 | 1.0087 | 1.0079 | 1.0075 | 1.0071 | 1.0068 | 1.0064 | 1.0060 | 1.0057 |
| 2.34 | 1.0093 | 1.0085 | 1.0078 | 1.0074 | 1.0071 | 1.0067 | 1.0064 | 1.0060 | 1.0057 |
| 2.35 | 1.0092 | 1.0084 | 1.0077 | 1.0073 | 1.0070 | 1.0067 | 1.0063 | 1.0060 | 1.0057 |
| 2.36 | 1.0091 | 1.0083 | 1.0075 | 1.0072 | 1.0069 | 1.0066 | 1.0063 | 1.0060 | 1.0057 |
| 2.37 | 1.0090 | 1.0082 | 1.0074 | 1.0071 | 1.0068 | 1.0066 | 1.0063 | 1.0060 | 1.0057 |
| 2.38 | 1.0089 | 1.0081 | 1.0073 | 1.0070 | 1.0068 | 1.0065 | 1.0062 | 1.0059 | 1.0057 |
| 2.39 | 1.0087 | 1.0080 | 1.0072 | 1.0070 | 1.0067 | 1.0064 | 1.0062 | 1.0059 | 1.0057 |
| 2.40 | 1.0086 | 1.0079 | 1.0071 | 1.0069 | 1.0066 | 1.0064 | 1.0061 | 1.0059 | 1.0057 |

C2 C-O  
Bond  
Distance→

C3 C-O  
Bond  
Distance  
↓

|      | 2.17   | 2.18   | 2.19   | 2.20   | 2.21   | 2.22   | 2.23   | 2.24   | 2.25   |
|------|--------|--------|--------|--------|--------|--------|--------|--------|--------|
| 1.90 | 1.0114 | 1.0111 | 1.0107 | 1.0104 | 1.0102 | 1.0100 | 1.0097 | 1.0095 | 1.0093 |
| 1.91 | 1.0112 | 1.0109 | 1.0105 | 1.0102 | 1.0100 | 1.0097 | 1.0095 | 1.0093 | 1.0091 |
| 1.92 | 1.0110 | 1.0107 | 1.0103 | 1.0100 | 1.0098 | 1.0095 | 1.0093 | 1.0091 | 1.0088 |
| 1.93 | 1.0108 | 1.0105 | 1.0101 | 1.0098 | 1.0096 | 1.0093 | 1.0091 | 1.0088 | 1.0086 |
| 1.94 | 1.0106 | 1.0103 | 1.0099 | 1.0096 | 1.0093 | 1.0091 | 1.0089 | 1.0086 | 1.0084 |
| 1.95 | 1.0104 | 1.0101 | 1.0097 | 1.0094 | 1.0091 | 1.0089 | 1.0086 | 1.0084 | 1.0082 |
| 1.96 | 1.0103 | 1.0099 | 1.0095 | 1.0092 | 1.0089 | 1.0087 | 1.0084 | 1.0082 | 1.0079 |
| 1.97 | 1.0101 | 1.0097 | 1.0093 | 1.0090 | 1.0087 | 1.0085 | 1.0082 | 1.0080 | 1.0077 |
| 1.98 | 1.0099 | 1.0095 | 1.0091 | 1.0088 | 1.0085 | 1.0083 | 1.0080 | 1.0077 | 1.0075 |
| 1.99 | 1.0097 | 1.0093 | 1.0089 | 1.0086 | 1.0083 | 1.0080 | 1.0078 | 1.0075 | 1.0073 |
| 2.00 | 1.0095 | 1.0091 | 1.0087 | 1.0084 | 1.0081 | 1.0078 | 1.0076 | 1.0073 | 1.0070 |
| 2.01 | 1.0093 | 1.0089 | 1.0085 | 1.0082 | 1.0079 | 1.0076 | 1.0074 | 1.0071 | 1.0069 |
| 2.02 | 1.0091 | 1.0087 | 1.0084 | 1.0080 | 1.0077 | 1.0074 | 1.0072 | 1.0069 | 1.0067 |
| 2.03 | 1.0090 | 1.0086 | 1.0082 | 1.0078 | 1.0075 | 1.0073 | 1.0070 | 1.0067 | 1.0065 |
| 2.04 | 1.0088 | 1.0084 | 1.0080 | 1.0076 | 1.0073 | 1.0071 | 1.0068 | 1.0065 | 1.0063 |
| 2.05 | 1.0086 | 1.0082 | 1.0078 | 1.0074 | 1.0071 | 1.0069 | 1.0066 | 1.0064 | 1.0061 |
| 2.06 | 1.0084 | 1.0080 | 1.0076 | 1.0072 | 1.0069 | 1.0067 | 1.0064 | 1.0062 | 1.0059 |
| 2.07 | 1.0083 | 1.0078 | 1.0074 | 1.0070 | 1.0067 | 1.0065 | 1.0062 | 1.0060 | 1.0057 |
| 2.08 | 1.0081 | 1.0076 | 1.0072 | 1.0068 | 1.0065 | 1.0063 | 1.0060 | 1.0058 | 1.0055 |
| 2.09 | 1.0079 | 1.0075 | 1.0070 | 1.0066 | 1.0064 | 1.0061 | 1.0059 | 1.0056 | 1.0054 |
| 2.10 | 1.0077 | 1.0073 | 1.0068 | 1.0064 | 1.0062 | 1.0059 | 1.0057 | 1.0054 | 1.0052 |
| 2.11 | 1.0076 | 1.0071 | 1.0067 | 1.0062 | 1.0060 | 1.0057 | 1.0055 | 1.0053 | 1.0050 |
| 2.12 | 1.0074 | 1.0070 | 1.0065 | 1.0061 | 1.0058 | 1.0056 | 1.0053 | 1.0051 | 1.0048 |
| 2.13 | 1.0073 | 1.0068 | 1.0064 | 1.0059 | 1.0057 | 1.0054 | 1.0052 | 1.0049 | 1.0047 |
| 2.14 | 1.0071 | 1.0067 | 1.0062 | 1.0058 | 1.0055 | 1.0053 | 1.0050 | 1.0048 | 1.0045 |
| 2.15 | 1.0069 | 1.0065 | 1.0060 | 1.0056 | 1.0053 | 1.0051 | 1.0049 | 1.0046 | 1.0044 |
| 2.16 | 1.0068 | 1.0063 | 1.0059 | 1.0054 | 1.0052 | 1.0049 | 1.0047 | 1.0044 | 1.0042 |
| 2.17 | 1.0066 | 1.0062 | 1.0057 | 1.0053 | 1.0050 | 1.0048 | 1.0045 | 1.0043 | 1.0040 |
| 2.18 | 1.0065 | 1.0060 | 1.0056 | 1.0051 | 1.0049 | 1.0046 | 1.0044 | 1.0041 | 1.0039 |
| 2.19 | 1.0063 | 1.0059 | 1.0054 | 1.0049 | 1.0047 | 1.0044 | 1.0042 | 1.0040 | 1.0037 |
| 2.20 | 1.0062 | 1.0057 | 1.0052 | 1.0048 | 1.0045 | 1.0043 | 1.0040 | 1.0038 | 1.0035 |
| 2.21 | 1.0061 | 1.0056 | 1.0052 | 1.0047 | 1.0045 | 1.0042 | 1.0040 | 1.0038 | 1.0035 |
| 2.22 | 1.0060 | 1.0055 | 1.0051 | 1.0046 | 1.0044 | 1.0042 | 1.0040 | 1.0038 | 1.0035 |
| 2.23 | 1.0059 | 1.0054 | 1.0050 | 1.0045 | 1.0043 | 1.0041 | 1.0039 | 1.0037 | 1.0035 |
| 2.24 | 1.0058 | 1.0053 | 1.0049 | 1.0044 | 1.0043 | 1.0041 | 1.0039 | 1.0037 | 1.0035 |

|      |        |        |        |        |        |        |        |        |        |
|------|--------|--------|--------|--------|--------|--------|--------|--------|--------|
| 2.25 | 1.0057 | 1.0053 | 1.0048 | 1.0044 | 1.0042 | 1.0040 | 1.0039 | 1.0037 | 1.0035 |
| 2.26 | 1.0056 | 1.0052 | 1.0047 | 1.0043 | 1.0041 | 1.0040 | 1.0038 | 1.0037 | 1.0035 |
| 2.27 | 1.0055 | 1.0051 | 1.0046 | 1.0042 | 1.0041 | 1.0039 | 1.0038 | 1.0037 | 1.0035 |
| 2.28 | 1.0054 | 1.0050 | 1.0045 | 1.0041 | 1.0040 | 1.0039 | 1.0038 | 1.0036 | 1.0035 |
| 2.29 | 1.0053 | 1.0049 | 1.0045 | 1.0040 | 1.0039 | 1.0038 | 1.0037 | 1.0036 | 1.0035 |
| 2.30 | 1.0052 | 1.0048 | 1.0044 | 1.0039 | 1.0039 | 1.0038 | 1.0037 | 1.0036 | 1.0035 |
| 2.31 | 1.0052 | 1.0048 | 1.0044 | 1.0040 | 1.0039 | 1.0038 | 1.0037 | 1.0036 | 1.0036 |
| 2.32 | 1.0053 | 1.0049 | 1.0045 | 1.0041 | 1.0040 | 1.0039 | 1.0038 | 1.0037 | 1.0036 |
| 2.33 | 1.0053 | 1.0049 | 1.0045 | 1.0042 | 1.0041 | 1.0039 | 1.0038 | 1.0037 | 1.0036 |
| 2.34 | 1.0053 | 1.0050 | 1.0046 | 1.0042 | 1.0041 | 1.0040 | 1.0039 | 1.0037 | 1.0036 |
| 2.35 | 1.0053 | 1.0050 | 1.0047 | 1.0043 | 1.0042 | 1.0041 | 1.0039 | 1.0038 | 1.0036 |
| 2.36 | 1.0053 | 1.0050 | 1.0047 | 1.0044 | 1.0043 | 1.0041 | 1.0040 | 1.0038 | 1.0037 |
| 2.37 | 1.0054 | 1.0051 | 1.0048 | 1.0045 | 1.0043 | 1.0042 | 1.0040 | 1.0038 | 1.0037 |
| 2.38 | 1.0054 | 1.0051 | 1.0048 | 1.0046 | 1.0044 | 1.0042 | 1.0040 | 1.0039 | 1.0037 |
| 2.39 | 1.0054 | 1.0052 | 1.0049 | 1.0046 | 1.0045 | 1.0043 | 1.0041 | 1.0039 | 1.0037 |
| 2.40 | 1.0054 | 1.0052 | 1.0050 | 1.0047 | 1.0045 | 1.0043 | 1.0041 | 1.0039 | 1.0037 |

C2 C-O  
Bond  
Distance→

C3 C-O  
Bond  
Distance  
↓

|      | 2.26   | 2.27   | 2.28   | 2.29   | 2.30   | 2.31   | 2.32   | 2.33   | 2.34   |
|------|--------|--------|--------|--------|--------|--------|--------|--------|--------|
| 1.90 | 1.0091 | 1.0088 | 1.0086 | 1.0084 | 1.0082 |        |        |        |        |
| 1.91 | 1.0088 | 1.0086 | 1.0084 | 1.0081 | 1.0079 |        |        |        |        |
| 1.92 | 1.0086 | 1.0084 | 1.0081 | 1.0079 | 1.0077 |        |        |        |        |
| 1.93 | 1.0084 | 1.0081 | 1.0079 | 1.0077 | 1.0074 |        |        |        |        |
| 1.94 | 1.0081 | 1.0079 | 1.0077 | 1.0074 | 1.0072 |        |        |        |        |
| 1.95 | 1.0079 | 1.0077 | 1.0074 | 1.0072 | 1.0069 |        |        |        |        |
| 1.96 | 1.0077 | 1.0074 | 1.0072 | 1.0069 | 1.0067 |        |        |        |        |
| 1.97 | 1.0075 | 1.0072 | 1.0070 | 1.0067 | 1.0065 |        |        |        |        |
| 1.98 | 1.0072 | 1.0070 | 1.0067 | 1.0065 | 1.0062 |        |        |        |        |
| 1.99 | 1.0070 | 1.0067 | 1.0065 | 1.0062 | 1.0060 |        |        |        |        |
| 2.00 | 1.0068 | 1.0065 | 1.0062 | 1.0060 | 1.0057 | 1.0056 | 1.0054 | 1.0053 | 1.0051 |
| 2.01 | 1.0066 | 1.0063 | 1.0061 | 1.0058 | 1.0055 | 1.0054 | 1.0052 | 1.0051 | 1.0049 |
| 2.02 | 1.0064 | 1.0061 | 1.0059 | 1.0056 | 1.0054 | 1.0052 | 1.0051 | 1.0049 | 1.0048 |
| 2.03 | 1.0062 | 1.0060 | 1.0057 | 1.0054 | 1.0052 | 1.0050 | 1.0049 | 1.0047 | 1.0046 |
| 2.04 | 1.0060 | 1.0058 | 1.0055 | 1.0053 | 1.0050 | 1.0049 | 1.0047 | 1.0045 | 1.0044 |
| 2.05 | 1.0059 | 1.0056 | 1.0053 | 1.0051 | 1.0048 | 1.0047 | 1.0045 | 1.0044 | 1.0042 |
| 2.06 | 1.0057 | 1.0054 | 1.0052 | 1.0049 | 1.0047 | 1.0045 | 1.0043 | 1.0042 | 1.0040 |
| 2.07 | 1.0055 | 1.0052 | 1.0050 | 1.0047 | 1.0045 | 1.0043 | 1.0042 | 1.0040 | 1.0038 |
| 2.08 | 1.0053 | 1.0050 | 1.0048 | 1.0045 | 1.0043 | 1.0041 | 1.0040 | 1.0038 | 1.0037 |
| 2.09 | 1.0051 | 1.0049 | 1.0046 | 1.0044 | 1.0041 | 1.0040 | 1.0038 | 1.0036 | 1.0035 |
| 2.10 | 1.0049 | 1.0047 | 1.0044 | 1.0042 | 1.0039 | 1.0038 | 1.0036 | 1.0035 | 1.0033 |
| 2.11 | 1.0048 | 1.0045 | 1.0043 | 1.0040 | 1.0038 | 1.0036 | 1.0035 | 1.0033 | 1.0032 |
| 2.12 | 1.0046 | 1.0044 | 1.0041 | 1.0039 | 1.0036 | 1.0035 | 1.0033 | 1.0032 | 1.0031 |
| 2.13 | 1.0044 | 1.0042 | 1.0039 | 1.0037 | 1.0035 | 1.0033 | 1.0032 | 1.0031 | 1.0029 |
| 2.14 | 1.0043 | 1.0040 | 1.0038 | 1.0035 | 1.0033 | 1.0032 | 1.0031 | 1.0029 | 1.0028 |
| 2.15 | 1.0041 | 1.0039 | 1.0036 | 1.0034 | 1.0031 | 1.0030 | 1.0029 | 1.0028 | 1.0027 |
| 2.16 | 1.0040 | 1.0037 | 1.0035 | 1.0032 | 1.0030 | 1.0029 | 1.0028 | 1.0027 | 1.0026 |
| 2.17 | 1.0038 | 1.0035 | 1.0033 | 1.0031 | 1.0028 | 1.0027 | 1.0026 | 1.0026 | 1.0025 |
| 2.18 | 1.0036 | 1.0034 | 1.0031 | 1.0029 | 1.0026 | 1.0026 | 1.0025 | 1.0024 | 1.0024 |
| 2.19 | 1.0035 | 1.0032 | 1.0030 | 1.0027 | 1.0025 | 1.0024 | 1.0024 | 1.0023 | 1.0022 |
| 2.20 | 1.0033 | 1.0031 | 1.0028 | 1.0026 | 1.0023 | 1.0023 | 1.0022 | 1.0022 | 1.0021 |
| 2.21 | 1.0033 | 1.0031 | 1.0029 | 1.0026 | 1.0024 | 1.0023 | 1.0023 | 1.0022 | 1.0022 |
| 2.22 | 1.0033 | 1.0031 | 1.0029 | 1.0027 | 1.0025 | 1.0024 | 1.0024 | 1.0023 | 1.0023 |
| 2.23 | 1.0033 | 1.0031 | 1.0030 | 1.0028 | 1.0026 | 1.0025 | 1.0024 | 1.0024 | 1.0023 |
| 2.24 | 1.0034 | 1.0032 | 1.0030 | 1.0028 | 1.0026 | 1.0026 | 1.0025 | 1.0025 | 1.0024 |
| 2.25 | 1.0034 | 1.0032 | 1.0030 | 1.0029 | 1.0027 | 1.0027 | 1.0026 | 1.0025 | 1.0025 |
| 2.26 | 1.0034 | 1.0032 | 1.0031 | 1.0029 | 1.0028 | 1.0027 | 1.0027 | 1.0026 | 1.0025 |
| 2.27 | 1.0034 | 1.0033 | 1.0031 | 1.0030 | 1.0029 | 1.0028 | 1.0027 | 1.0027 | 1.0026 |
| 2.28 | 1.0034 | 1.0033 | 1.0032 | 1.0031 | 1.0030 | 1.0029 | 1.0028 | 1.0027 | 1.0027 |
| 2.29 | 1.0034 | 1.0033 | 1.0032 | 1.0031 | 1.0030 | 1.0030 | 1.0029 | 1.0028 | 1.0027 |
| 2.30 | 1.0035 | 1.0034 | 1.0033 | 1.0032 | 1.0031 | 1.0030 | 1.0030 | 1.0029 | 1.0028 |

|             |        |        |        |        |        |        |        |        |        |
|-------------|--------|--------|--------|--------|--------|--------|--------|--------|--------|
| <b>2.31</b> | 1.0035 | 1.0034 | 1.0033 | 1.0032 | 1.0031 | 1.0030 | 1.0029 | 1.0029 | 1.0028 |
| <b>2.32</b> | 1.0035 | 1.0034 | 1.0033 | 1.0032 | 1.0031 | 1.0030 | 1.0029 | 1.0028 | 1.0028 |
| <b>2.33</b> | 1.0035 | 1.0034 | 1.0033 | 1.0031 | 1.0030 | 1.0030 | 1.0029 | 1.0028 | 1.0028 |
| <b>2.34</b> | 1.0035 | 1.0034 | 1.0032 | 1.0031 | 1.0030 | 1.0029 | 1.0029 | 1.0028 | 1.0027 |
| <b>2.35</b> | 1.0035 | 1.0034 | 1.0032 | 1.0031 | 1.0030 | 1.0029 | 1.0028 | 1.0028 | 1.0027 |
| <b>2.36</b> | 1.0035 | 1.0034 | 1.0032 | 1.0031 | 1.0029 | 1.0029 | 1.0028 | 1.0027 | 1.0027 |
| <b>2.37</b> | 1.0035 | 1.0034 | 1.0032 | 1.0030 | 1.0029 | 1.0028 | 1.0028 | 1.0027 | 1.0027 |
| <b>2.38</b> | 1.0035 | 1.0034 | 1.0032 | 1.0030 | 1.0028 | 1.0028 | 1.0028 | 1.0027 | 1.0027 |
| <b>2.39</b> | 1.0035 | 1.0034 | 1.0032 | 1.0030 | 1.0028 | 1.0028 | 1.0027 | 1.0027 | 1.0026 |
| <b>2.40</b> | 1.0036 | 1.0034 | 1.0032 | 1.0030 | 1.0028 | 1.0027 | 1.0027 | 1.0027 | 1.0026 |

C2 C-O  
Bond  
Distance→

C3 C-O  
Bond  
Distance  
↓

|             | <b>2.35</b> | <b>2.36</b> | <b>2.37</b> | <b>2.38</b> | <b>2.39</b> | <b>2.40</b> | <b>2.41</b> | <b>2.42</b> | <b>2.43</b> |
|-------------|-------------|-------------|-------------|-------------|-------------|-------------|-------------|-------------|-------------|
| <b>2.00</b> | 1.0050      | 1.0048      | 1.0047      | 1.0045      | 1.0044      | 1.0042      | 1.0042      | 1.0041      | 1.0040      |
| <b>2.01</b> | 1.0048      | 1.0046      | 1.0045      | 1.0043      | 1.0042      | 1.0040      | 1.0040      | 1.0039      | 1.0038      |
| <b>2.02</b> | 1.0046      | 1.0045      | 1.0043      | 1.0042      | 1.0040      | 1.0039      | 1.0038      | 1.0037      | 1.0037      |
| <b>2.03</b> | 1.0044      | 1.0043      | 1.0041      | 1.0040      | 1.0038      | 1.0037      | 1.0036      | 1.0035      | 1.0035      |
| <b>2.04</b> | 1.0042      | 1.0041      | 1.0039      | 1.0038      | 1.0036      | 1.0035      | 1.0034      | 1.0034      | 1.0033      |
| <b>2.05</b> | 1.0041      | 1.0039      | 1.0037      | 1.0036      | 1.0034      | 1.0033      | 1.0032      | 1.0032      | 1.0031      |
| <b>2.06</b> | 1.0039      | 1.0037      | 1.0036      | 1.0034      | 1.0032      | 1.0031      | 1.0030      | 1.0030      | 1.0029      |
| <b>2.07</b> | 1.0037      | 1.0035      | 1.0034      | 1.0032      | 1.0031      | 1.0029      | 1.0028      | 1.0028      | 1.0027      |
| <b>2.08</b> | 1.0035      | 1.0033      | 1.0032      | 1.0030      | 1.0029      | 1.0027      | 1.0027      | 1.0026      | 1.0026      |
| <b>2.09</b> | 1.0033      | 1.0032      | 1.0030      | 1.0028      | 1.0027      | 1.0025      | 1.0025      | 1.0024      | 1.0024      |
| <b>2.10</b> | 1.0031      | 1.0030      | 1.0028      | 1.0027      | 1.0025      | 1.0023      | 1.0023      | 1.0022      | 1.0022      |
| <b>2.11</b> | 1.0030      | 1.0029      | 1.0027      | 1.0026      | 1.0024      | 1.0023      | 1.0022      | 1.0022      | 1.0022      |
| <b>2.12</b> | 1.0029      | 1.0028      | 1.0026      | 1.0025      | 1.0024      | 1.0022      | 1.0022      | 1.0022      | 1.0022      |
| <b>2.13</b> | 1.0028      | 1.0027      | 1.0026      | 1.0024      | 1.0023      | 1.0022      | 1.0022      | 1.0022      | 1.0022      |
| <b>2.14</b> | 1.0027      | 1.0026      | 1.0025      | 1.0024      | 1.0022      | 1.0021      | 1.0021      | 1.0021      | 1.0021      |
| <b>2.15</b> | 1.0026      | 1.0025      | 1.0024      | 1.0023      | 1.0022      | 1.0021      | 1.0021      | 1.0021      | 1.0021      |
| <b>2.16</b> | 1.0025      | 1.0024      | 1.0023      | 1.0022      | 1.0021      | 1.0020      | 1.0021      | 1.0021      | 1.0021      |
| <b>2.17</b> | 1.0024      | 1.0023      | 1.0022      | 1.0021      | 1.0021      | 1.0020      | 1.0020      | 1.0021      | 1.0021      |
| <b>2.18</b> | 1.0023      | 1.0022      | 1.0021      | 1.0021      | 1.0020      | 1.0019      | 1.0020      | 1.0020      | 1.0021      |
| <b>2.19</b> | 1.0022      | 1.0021      | 1.0021      | 1.0020      | 1.0019      | 1.0019      | 1.0019      | 1.0020      | 1.0021      |
| <b>2.20</b> | 1.0021      | 1.0020      | 1.0020      | 1.0019      | 1.0019      | 1.0018      | 1.0019      | 1.0020      | 1.0021      |
| <b>2.21</b> | 1.0021      | 1.0021      | 1.0020      | 1.0020      | 1.0019      | 1.0019      | 1.0020      | 1.0020      | 1.0021      |
| <b>2.22</b> | 1.0022      | 1.0021      | 1.0021      | 1.0020      | 1.0020      | 1.0019      | 1.0020      | 1.0021      | 1.0021      |
| <b>2.23</b> | 1.0023      | 1.0022      | 1.0022      | 1.0021      | 1.0020      | 1.0020      | 1.0020      | 1.0021      | 1.0022      |
| <b>2.24</b> | 1.0023      | 1.0023      | 1.0022      | 1.0022      | 1.0021      | 1.0020      | 1.0021      | 1.0021      | 1.0022      |
| <b>2.25</b> | 1.0024      | 1.0023      | 1.0023      | 1.0022      | 1.0022      | 1.0021      | 1.0021      | 1.0022      | 1.0022      |
| <b>2.26</b> | 1.0025      | 1.0024      | 1.0023      | 1.0023      | 1.0022      | 1.0021      | 1.0022      | 1.0022      | 1.0023      |
| <b>2.27</b> | 1.0025      | 1.0025      | 1.0024      | 1.0023      | 1.0023      | 1.0022      | 1.0022      | 1.0023      | 1.0023      |
| <b>2.28</b> | 1.0026      | 1.0025      | 1.0025      | 1.0024      | 1.0023      | 1.0022      | 1.0023      | 1.0023      | 1.0023      |
| <b>2.29</b> | 1.0027      | 1.0026      | 1.0025      | 1.0024      | 1.0024      | 1.0023      | 1.0023      | 1.0023      | 1.0023      |
| <b>2.30</b> | 1.0027      | 1.0027      | 1.0026      | 1.0025      | 1.0024      | 1.0023      | 1.0024      | 1.0024      | 1.0024      |
| <b>2.31</b> | 1.0027      | 1.0026      | 1.0026      | 1.0025      | 1.0024      | 1.0023      |             |             |             |
| <b>2.32</b> | 1.0027      | 1.0026      | 1.0026      | 1.0025      | 1.0024      | 1.0023      |             |             |             |
| <b>2.33</b> | 1.0027      | 1.0026      | 1.0026      | 1.0025      | 1.0024      | 1.0024      |             |             |             |
| <b>2.34</b> | 1.0027      | 1.0026      | 1.0025      | 1.0025      | 1.0024      | 1.0024      |             |             |             |
| <b>2.35</b> | 1.0027      | 1.0026      | 1.0025      | 1.0025      | 1.0024      | 1.0024      |             |             |             |
| <b>2.36</b> | 1.0026      | 1.0026      | 1.0025      | 1.0025      | 1.0024      | 1.0024      |             |             |             |
| <b>2.37</b> | 1.0026      | 1.0026      | 1.0025      | 1.0025      | 1.0024      | 1.0024      |             |             |             |
| <b>2.38</b> | 1.0026      | 1.0026      | 1.0025      | 1.0025      | 1.0024      | 1.0024      |             |             |             |
| <b>2.39</b> | 1.0026      | 1.0025      | 1.0025      | 1.0024      | 1.0024      | 1.0024      |             |             |             |
| <b>2.40</b> | 1.0026      | 1.0025      | 1.0025      | 1.0024      | 1.0024      | 1.0024      |             |             |             |

C2 C-O  
Bond  
Distance→

C3 C-O  
Bond  
Distance

|  | <b>2.44</b> | <b>2.45</b> | <b>2.46</b> | <b>2.47</b> | <b>2.48</b> | <b>2.49</b> | <b>2.50</b> |
|--|-------------|-------------|-------------|-------------|-------------|-------------|-------------|
|--|-------------|-------------|-------------|-------------|-------------|-------------|-------------|

↓

|      |        |        |        |        |        |        |        |
|------|--------|--------|--------|--------|--------|--------|--------|
| 2.00 | 1.0040 | 1.0039 | 1.0038 | 1.0037 | 1.0037 | 1.0036 | 1.0035 |
| 2.01 | 1.0038 | 1.0037 | 1.0036 | 1.0036 | 1.0035 | 1.0034 | 1.0034 |
| 2.02 | 1.0036 | 1.0035 | 1.0035 | 1.0034 | 1.0033 | 1.0033 | 1.0032 |
| 2.03 | 1.0034 | 1.0033 | 1.0033 | 1.0032 | 1.0031 | 1.0031 | 1.0030 |
| 2.04 | 1.0032 | 1.0032 | 1.0031 | 1.0030 | 1.0030 | 1.0029 | 1.0029 |
| 2.05 | 1.0030 | 1.0030 | 1.0029 | 1.0029 | 1.0028 | 1.0027 | 1.0027 |
| 2.06 | 1.0029 | 1.0028 | 1.0028 | 1.0027 | 1.0026 | 1.0026 | 1.0025 |
| 2.07 | 1.0027 | 1.0026 | 1.0026 | 1.0025 | 1.0025 | 1.0024 | 1.0024 |
| 2.08 | 1.0025 | 1.0025 | 1.0024 | 1.0023 | 1.0023 | 1.0022 | 1.0022 |
| 2.09 | 1.0023 | 1.0023 | 1.0022 | 1.0022 | 1.0021 | 1.0021 | 1.0020 |
| 2.10 | 1.0021 | 1.0021 | 1.0020 | 1.0020 | 1.0020 | 1.0019 | 1.0019 |
| 2.11 | 1.0021 | 1.0021 | 1.0021 | 1.0020 | 1.0020 | 1.0020 | 1.0019 |
| 2.12 | 1.0021 | 1.0021 | 1.0021 | 1.0021 | 1.0021 | 1.0020 | 1.0020 |
| 2.13 | 1.0021 | 1.0021 | 1.0021 | 1.0021 | 1.0021 | 1.0021 | 1.0021 |
| 2.14 | 1.0021 | 1.0022 | 1.0022 | 1.0022 | 1.0022 | 1.0022 | 1.0022 |
| 2.15 | 1.0021 | 1.0022 | 1.0022 | 1.0022 | 1.0022 | 1.0022 | 1.0023 |
| 2.16 | 1.0021 | 1.0022 | 1.0022 | 1.0022 | 1.0023 | 1.0023 | 1.0023 |
| 2.17 | 1.0022 | 1.0022 | 1.0022 | 1.0023 | 1.0023 | 1.0024 | 1.0024 |
| 2.18 | 1.0022 | 1.0022 | 1.0023 | 1.0023 | 1.0024 | 1.0024 | 1.0025 |
| 2.19 | 1.0022 | 1.0022 | 1.0023 | 1.0024 | 1.0024 | 1.0025 | 1.0026 |
| 2.20 | 1.0022 | 1.0022 | 1.0023 | 1.0024 | 1.0025 | 1.0026 | 1.0026 |
| 2.21 | 1.0022 | 1.0023 | 1.0023 | 1.0024 | 1.0025 | 1.0026 | 1.0026 |
| 2.22 | 1.0022 | 1.0023 | 1.0023 | 1.0024 | 1.0025 | 1.0025 | 1.0026 |
| 2.23 | 1.0022 | 1.0023 | 1.0023 | 1.0024 | 1.0025 | 1.0025 | 1.0026 |
| 2.24 | 1.0022 | 1.0023 | 1.0024 | 1.0024 | 1.0025 | 1.0025 | 1.0026 |
| 2.25 | 1.0023 | 1.0023 | 1.0024 | 1.0024 | 1.0024 | 1.0025 | 1.0025 |
| 2.26 | 1.0023 | 1.0023 | 1.0024 | 1.0024 | 1.0024 | 1.0025 | 1.0025 |
| 2.27 | 1.0023 | 1.0023 | 1.0024 | 1.0024 | 1.0024 | 1.0025 | 1.0025 |
| 2.28 | 1.0023 | 1.0024 | 1.0024 | 1.0024 | 1.0024 | 1.0025 | 1.0025 |
| 2.29 | 1.0024 | 1.0024 | 1.0024 | 1.0024 | 1.0024 | 1.0024 | 1.0025 |
| 2.30 | 1.0024 | 1.0024 | 1.0024 | 1.0024 | 1.0024 | 1.0024 | 1.0024 |

## Geometry Predictions from Non-Stationary Point Grid

| GAS            | Predicted C-O Bond Distances from Non-Stationary Point Grid |      | C-O Bond Distance Difference between Stationary and Non-Stationary Point Geometries |       |
|----------------|-------------------------------------------------------------|------|-------------------------------------------------------------------------------------|-------|
|                | C3                                                          | C2   | C3                                                                                  | C2    |
| b3lyp/6-31+G** |                                                             |      |                                                                                     |       |
| ts 2           | 2.04                                                        | 2.19 | -0.01                                                                               | 0.05  |
| ts 3           | 2.05                                                        | 2.18 | 0.03                                                                                | 0.03  |
| ts 4           | 2.10                                                        | 2.12 | 0.01                                                                                | 0.04  |
| ts 5           | 1.99                                                        | 2.24 | 0.01                                                                                | 0.00  |
| ts 6           | 2.04                                                        | 2.21 | 0.01                                                                                | 0.03  |
| ts 7           | 2.00                                                        | 2.21 | -0.02                                                                               | 0.03  |
| ts 8           | 2.02                                                        | 2.20 | 0.01                                                                                | -0.01 |
| ts 9           | 2.05                                                        | 2.14 | -0.02                                                                               | 0.02  |

| PCM            | Predicted C-O Bond Distances from Non-Stationary Point Grid |      | C-O Bond Distance Difference between Stationary and Non-Stationary Point Geometries |      |
|----------------|-------------------------------------------------------------|------|-------------------------------------------------------------------------------------|------|
|                | C3                                                          | C2   | C3                                                                                  | C2   |
| b3lyp/6-31+G** |                                                             |      |                                                                                     |      |
| ts 2           | 2.10                                                        | 2.21 | 0.06                                                                                | 0.13 |
| ts 3           | 2.09                                                        | 2.25 | 0.08                                                                                | 0.09 |
| ts 4           | 2.12                                                        | 2.19 | 0.06                                                                                | 0.13 |
| ts 5           | 2.09                                                        | 2.22 | 0.06                                                                                | 0.10 |
| ts 6           | 2.10                                                        | 2.21 | 0.07                                                                                | 0.12 |

|      |      |      |      |      |
|------|------|------|------|------|
| ts 7 | 2.11 | 2.18 | 0.03 | 0.13 |
| ts 8 | 2.09 | 2.20 | 0.06 | 0.12 |
| ts 9 | 2.11 | 2.19 | 0.05 | 0.11 |

| <b>GAS PHASE TRANS</b> | Predicted C-O Bond Distances from Non-Stationary Point Grid |      | C-O Bond Distance Difference between Stationary and Non-Stationary Point Geometries |       |
|------------------------|-------------------------------------------------------------|------|-------------------------------------------------------------------------------------|-------|
| <b>b3lyp/6-31+G**</b>  |                                                             |      |                                                                                     |       |
| ts 3                   | 2.04                                                        | 2.17 | 0.02                                                                                | 0.02  |
| ts 5                   | 1.95                                                        | 2.30 | 0.01                                                                                | 0.00  |
| ts 7                   | 1.95                                                        | 2.27 | -0.02                                                                               | 0.02  |
| ts 8                   | 2.00                                                        | 2.20 | -0.01                                                                               | -0.02 |
| ts 9                   | 2.12                                                        | 2.04 | -0.03                                                                               | 0.02  |

| <b>GAS PHASE CIS</b>  | Predicted C-O Bond Distances from Non-Stationary Point Grid |      | C-O Bond Distance Difference between Stationary and Non-Stationary Point Geometries |      |
|-----------------------|-------------------------------------------------------------|------|-------------------------------------------------------------------------------------|------|
| <b>b3lyp/6-31+G**</b> |                                                             |      |                                                                                     |      |
| ts 3                  | 1.94                                                        | 2.30 | 0.02                                                                                | 0.04 |
| ts 5                  | 2.00                                                        | 2.19 | -0.02                                                                               | 0.02 |
| ts 7                  | 2.23                                                        | 1.97 | -0.07                                                                               | 0.01 |
| ts 8                  | 1.94                                                        | 2.30 | 0.02                                                                                | 0.04 |
| ts 9                  | 1.95                                                        | 2.28 | 0.00                                                                                | 0.00 |

| <b>PCM TRANS</b>      | Predicted C-O Bond Distances from Non-Stationary Point Grid |      | C-O Bond Distance Difference between Stationary and Non-Stationary Point Geometries |      |
|-----------------------|-------------------------------------------------------------|------|-------------------------------------------------------------------------------------|------|
| <b>b3lyp/6-31+G**</b> |                                                             |      |                                                                                     |      |
| ts 3                  | 2.08                                                        | 2.20 | 0.05                                                                                | 0.09 |
| ts 5                  | 2.02                                                        | 2.27 | 0.06                                                                                | 0.07 |
| ts 7                  | 2.02                                                        | 2.26 | 0.03                                                                                | 0.11 |
| ts 8                  | 2.07                                                        | 2.20 | 0.04                                                                                | 0.07 |
| ts 9                  | 2.11                                                        | 2.13 | 0.03                                                                                | 0.08 |

| <b>PCM CIS</b>        | Predicted C-O Bond Distances from Non-Stationary Point Grid |      | C-O Bond Distance Difference between Stationary and Non-Stationary Point Geometries |      |
|-----------------------|-------------------------------------------------------------|------|-------------------------------------------------------------------------------------|------|
| <b>b3lyp/6-31+G**</b> |                                                             |      |                                                                                     |      |
| ts 3                  | 2.00                                                        | 2.35 | 0.09                                                                                | 0.03 |
| ts 5                  | 2.06                                                        | 2.20 | 0.03                                                                                | 0.09 |
| ts 7                  | 2.21                                                        | 2.04 | 0.03                                                                                | 0.06 |
| ts 8                  | 2.00                                                        | 2.31 | 0.06                                                                                | 0.07 |
| ts 9                  | 2.01                                                        | 2.28 | 0.04                                                                                | 0.13 |

## Experimental NMR Results.

The integrations of the C4 methyl carbon of 2-methyl-2-butene was in each spectrum set to 1000. The average integrations for the other carbons for each reaction are shown in Table A, along with the standard results for starting material that had not been subjected to the reaction conditions. In each case the averages are based on 6 spectra. Table A also shows the relative isotopic enhancements ( $R/R_0$ ), calculated as the ratio of integrations for the recovered versus standard materials. The standard deviations ( $\Delta R/R_0$ ) were calculated from eq 1, where IntSample is the

average integration for each sample peak (listed in the table), IntStandard is the average integration for the corresponding peak in the standard (listed in the table), and  $\Delta$ IntSample and  $\Delta$ IntStandard are the standard deviations in the sample and standard peaks, respectively. From the  $R/R_0$ 's,  $\Delta R/R_0$ 's, and uncertainties in the % conversion, the KIEs and errors were calculated as previously described. (Singleton, D. A.; Thomas, A. A. *J. Am. Chem. Soc.* **1995**, *117*, 9357.)

$$\Delta R/R_0 = R/R_0 * ((\Delta \text{IntSample}/\text{IntSample})^2 + (\Delta \text{IntStandard}/\text{IntStandard})^2)^{1/2} \quad (1)$$

Table A. Average  $^{13}\text{C}$  Integration and  $R/R_0$ 's for epoxidation of 2-methyl-2-butene.

|                | C1     | C2      | C3      | C4      | C5     |
|----------------|--------|---------|---------|---------|--------|
| standard       | 977.62 | 1047.54 | 1032.90 | 1000.00 | 978.23 |
| exp 1          | 989.17 | 1067.17 | 1033.90 | 1000.00 | 977.67 |
| $R/R_0$        | 1.012  | 1.019   | 1.001   | 1.000   | 0.999  |
| $\Delta R/R_0$ | 0.005  | 0.004   | 0.003   |         | 0.003  |
| standard       | 977.62 | 1047.54 | 1032.90 | 1000.00 | 978.23 |
| exp 2          | 989.29 | 1067.62 | 1032.70 | 1000.00 | 978.75 |
| $R/R_0$        | 1.012  | 1.019   | 1.000   | 1.000   | 1.001  |
| $\Delta R/R_0$ | 0.004  | 0.002   | 0.003   | 0.000   | 0.003  |
